# Supplementary material for: A review of PFAS fingerprints in fish from Norwegian freshwater bodies subject to different source inputs
Source: Royal Society of Chemistry journal article supplement (doi:10.1039/d1em00408e), 2022-01-01
Supplement: d1em00408e1.pdf [file d1em00408e1.pdf]

1  
2  
3  
4  
5  
6  
7  
8  
9  
  
10  
11  
12  
13  
14  
15  
16  
17  
18  
19  
20  
21  
22  
23  
24  
25  
26  
27  
28

## Supplementary Information

### A review of PFAS fingerprints in fish from Norwegian freshwater bodies subject to different source inputs

Håkon A. Langberg <sup>a, b, \*</sup>, Sarah E. Hale <sup>a</sup>, Gijs D. Breedveld <sup>a, c</sup>, Bjørn M. Jenssen <sup>b</sup>, and Morten Jartun <sup>d</sup>

<sup>a</sup> Environment and Geotechnics, Norwegian Geotechnical Institute (NGI), Oslo, Norway

<sup>b</sup> Department of Biology, Norwegian University of Science and Technology (NTNU), Trondheim, Norway

<sup>c</sup> Department of Geosciences, University of Oslo, Oslo, Norway

<sup>d</sup> Norwegian Institute for Water Research (NIVA), Oslo, Norway

---

Pages: 29

Tables: 9

Figures: 6

### Table of content

|                                                                          |    |
|--------------------------------------------------------------------------|----|
| Lake descriptions.....                                                   | 2  |
| Lake Mjøsa.....                                                          | 2  |
| Femunden.....                                                            | 2  |
| Lake Randsfjorden.....                                                   | 3  |
| Chemical analyses.....                                                   | 3  |
| Eurofins Environment Testing Norway AS.....                              | 3  |
| Norwegian Institute for Water Research (NIVA).....                       | 3  |
| Statistical analyses.....                                                | 4  |
| Selection of sites and PFAS for Principal Components Analyses (PCA)..... | 5  |
| Brown trout muscle.....                                                  | 6  |
| Perch muscle.....                                                        | 7  |
| Supplementary tables.....                                                | 8  |
| Supplementary figures.....                                               | 24 |
| References.....                                                          | 29 |

## 29 **Lake descriptions**

30 Short descriptions of each of the large lakes: lake Mjøsa, lake Femunden, and lake Randsfjorden is  
31 given below. A summary of all the investigated water bodies is shown in Table S1.

### 32 **Lake Mjøsa**

33 Lake Mjøsa is the largest lake in Norway (surface area: 369 km<sup>2</sup>). It is a deep lake (maximum 453 m)  
34 situated in the central-eastern part of Norway and is subject to several possible environmental  
35 impacts. These include runoff from major roads, industries, urban areas (five cities located at the lake),  
36 and discharge from waste water treatment plants (WWTPs), including three large and several smaller  
37 plants, with a total of 200 000 population equivalents (PE) (Blytt and Stang, 2019). Agricultural runoff  
38 and input from major rivers also provide significant pollutant fluxes to the lake. Theoretical mean  
39 residence time for Lake Mjøsa is 4.9 years. Lake Mjøsa contains over 20 different fish species, such as  
40 brown trout (*Salmo trutta*), pike (*Esox Lucius*), perch (*Perca fluviatilis*) and burbot (*Lota lota*) (e.g.  
41 (Spikkeland *et al.*, 2016; Fjeld *et al.*, 2017; Sandlund *et al.*, 2017). The biodiversity of Lake Mjøsa is rich  
42 and it causes the top-predator brown trout and E. smelt to be at a higher trophic level in this lake  
43 compared to similar lakes in Norway.

### 44 **Femunden**

45 Lake Femunden is the third largest lake in Norway (surface area: 203 km<sup>2</sup>) and is, contrary to Lake  
46 Mjøsa, situated in a forested and mountainous catchment area. It is characterized as a low productive  
47 oligotrophic lake with no artificial regulation and with limited anthropogenic impacts, mostly from  
48 backpacking hikers and some minor roads. 62 % of the catchment area consist of bare mountain,  
49 whereas 26 % is forests, 12 % water bodies and only 0.2 % agriculture. To the best of our knowledge,  
50 the main environmental impact comes from long-range transport. There is a small wastewater facility  
51 close to the lake (PE: ~200), but it has infiltration to the ground and no direct discharges to the lake.  
52 The lake is 60 km long and 10 km wide (widest area). Several areas are quite deep, at up to 90 m deep  
53 in the northern part and 150 m deep in the southern end of the lake. Riverine inputs peak in the snow  
54 melting season in May/June with a mean discharge of 12-16 Ls<sup>-1</sup>km<sup>-2</sup>. The theoretical mean residence  
55 time is 7.6 years. The ecosystem in lake Femunden consist of eight species of fish including brown  
56 trout, European whitefish (*Coregonus lavaretus*) and Arctic char (*Salvelinus alpinus*). E. whitefish is the  
57 main prey for brown trout as they become piscivorous at the age of 3-9 years, or approximately 30 cm  
58 (Sandlund *et al.*, 2012). Only a small proportion of the brown trout population in Lake Femunden is  
59 pelagic, the majority prey in the littoral zone on benthic or terrestrial (insects) organisms (Næsje *et al.*,  
60 1996; Jonsson *et al.*, 1999).

## 61 **Lake Randsfjorden**

62 Lake Randsfjorden is the fourth largest lake in Norway (surface area: 140 km<sup>2</sup>), containing 11 fish  
63 species. Local human impact to Lake Randsfjorden takes the form of a significant amount of agricultural  
64 runoff with limited local sources of contaminants. Treated sewage from approximately 30 000 PE runs  
65 into the lake in addition to private scattered drains. The lake is 77 km long and has an area of 140 km<sup>2</sup>,  
66 with a theoretical mean residence time of 2.5 years. Top predators in the pelagic food web include  
67 brown trout and arctic char (*Salvelinus alpinus*). Planktivore fish species are dominated by European  
68 smelt and whitefish. Contrary to Lake Mjøsa, the pelagic food web in Lake Randsfjorden does not  
69 contain the invertebrate opossum shrimp *Mysis relicta* consequently making the pelagic food web  
70 chain in Lake Randsfjorden shorter than in Lake Mjøsa.

## 71 **Chemical analyses**

### 72 **Eurofins Environment Testing Norway AS**

73 Chemical analysis of samples from sites 1-3 (Oslo airport, Evenes airport, and Fagernes airport), as well  
74 as muscle samples from site 4 (Rygge airport) were carried out by Eurofins Environment Testing  
75 Norway AS. Up to 22 PFAS were targeted according to method DIN EN ISO/IEC 17025:2005 using high  
76 performance liquid chromatography and mass spectrometric detection (HPLC/MS-MS). Approximately  
77 1.5 g material was freeze dried and 18 surrogate standards (<sup>13</sup>C-PFOS, <sup>13</sup>C<sub>2</sub>-PFDoA, <sup>18</sup>O<sub>2</sub>-PFHxS, <sup>18</sup>O<sub>2</sub>-  
78 PFHxS, <sup>13</sup>C<sub>8</sub>-PFOSA, <sup>13</sup>C<sub>2</sub>-PFTeDA, <sup>13</sup>C-PFBS, <sup>13</sup>C-PFBS, <sup>13</sup>C<sub>4</sub>-PFHpA, <sup>13</sup>C<sub>5</sub>-PFPeA, <sup>13</sup>C<sub>2</sub>-6:2FTS, <sup>13</sup>C<sub>2</sub>-6:2FTS,  
79 <sup>13</sup>C<sub>4</sub>-PFBA, <sup>13</sup>C<sub>2</sub>-PFHxA, <sup>13</sup>C<sub>8</sub>-PFOA, <sup>13</sup>C<sub>5</sub>-PFNA, <sup>13</sup>C<sub>2</sub>-PFDA, and <sup>13</sup>C<sub>2</sub>-PFUnA) were added. Extraction was  
80 performed using methanol in an ultrasonic bath followed by vaporization. Acetonitrile and hexane  
81 were added for solvent exchange. The acetonitrile phase was cleaned up, vaporized, and dissolved in  
82 methanol. <sup>13</sup>C<sub>4</sub>-PFOA was used as internal standard. Sample intake weights were used to calculate  
83 sample specific limits of quantifications (LOQ).

### 84 **Norwegian Institute for Water Research (NIVA)**

85 Analysis of samples from sites 5-8, as well as liver samples from site 4, were performed by the  
86 Norwegian Institute for Water Research (NIVA) following previously described methods (Langberg *et*  
87 *al.*, 2020). Analyses were performed using liquid chromatography quadrupole time-of-flight mass  
88 spectrometry (LC-qTOF-MS). A mixture of isotope labelled PFAS (MPFAC-MX\_C-ES purchased from  
89 Wellington Laboratories: M8PFOSA, M2-6:2FTS, M2-8:2FTS, d5-N-MeFOSA-M, d9-N-etFOSE-M, d5-N-  
90 EtFOSAA-M, M4-8:2 diPAP) was added as internal standards (IS) for quantification before extraction.  
91 Approximately 2 grams of wet biota sample was weighed and IS was added. Extraction was carried out  
92 twice using acetonitrile (5+4 mL), ultrasonic bath (30+30 min) and shaking (30+30 min). Extracts were

93 concentrated under a nitrogen flow. Aliquots of 7  $\mu\text{L}$  extract were injected onto a Waters Acquity BEH  
94 C8 reversed phase column (100 x 2.1 mm, 1.8  $\mu\text{m}$  particles, using an Acquity Ultra Performance HPLC  
95 system (Waters). The target compounds were separated at a flow rate of 0.5  $\text{mL min}^{-1}$  using acetonitrile  
96 (A) and 5.2 mM  $\text{NH}_4\text{OAc}$  in water (B). The following binary gradient was applied: 0-1.5 min, 12% of A;  
97 1.5-11 min, linear change to 99% of A; 11-13 min, 99% of A. The Acquity system was coupled to a Xevo  
98 G2-S Q-ToF-HRMS instrument (Waters) using negative ion electrospray ionization (ESI(-)). Mass spectra  
99 were registered in full scan mode (mass range  $m/z$  of 150-1100). The following optimized parameters  
100 were applied: Capillary voltage, 0.7 kV; desolvation temperature, 500  $^\circ\text{C}$ ; source temperature, 120  $^\circ\text{C}$ ;  
101 nitrogen desolvation gas flow, 800  $\text{L h}^{-1}$ . Quantitative analysis was performed employing extracted  
102 mass chromatograms from full scan recording using the  $m/z$  (typical mass tolerance of 0.03  $\mu$ ) for the  
103 different analytes.

104 Blank samples and standard addition samples were used for each batch of samples for analyses (20-25  
105 samples). Concentrations in the blank samples were low ( $<0.5 \text{ ng g}^{-1}$  or  $\text{ng L}^{-1}$ ) and consistent regardless  
106 of different equipment, indicating little cross contamination. Blank values were subtracted from results  
107 when calculating concentrations in samples. The autosampler was set up with a stainless-steel needle  
108 and a washing program using MeOH/Isopropyl alcohol (IPA) as a strong washing solution. Instruments  
109 were cleaned daily, and blank samples were run before and after each analysis batch (typically 20-30  
110 samples). A random sample was selected for duplicate analysis to control for repeatability. Recoveries  
111 of QA samples (matrix matched standard addition samples) in the present work were satisfactory  
112 (within the range of 70-110%). LOQ for individual PFAS are reported in Table S3.

## 113 **Statistical analyses**

114 Concentrations are given on a wet weight basis (w.w.). Averages are presented as arithmetic means  
115 with the standard error of the mean (SEM) where appropriate. Differences in PFAS profiles  
116 (composition, expressed as relative distribution profiles of the total  $\Sigma\text{PFAS}$ ) between sites were  
117 explored using PCA. For each individual PCA, the PFAS profiles were standardized to have mean zero  
118 and standard deviation of one before performing PCA. According to the Shapiro-Wilk  $w$ -test and shape  
119 of data histograms, not all of the datasets were normally distributed. Therefore, differences in PFAS  
120 concentrations, percentages, and ratios, as well as differences in PC1 scores were tested using the non-  
121 parametric Kruskal-Wallis test and Bonferroni correction. The level of significance was set to 0.05.  
122 Statistical analyses were carried out using R version 3.4.2; R Core Team; Vienna, Austria (R Core Team,  
123 2017) (packages agricolae (de Mendiburu, 2019) factoextra (Kassambara and Mundt, 2017) and  
124 FactoMineR (Lê *et al.*, 2008), functions: kruskal.test, kruskal, prcomp (scale=T and center=T)).

## 125 **Selection of sites and PFAS for Principal Components Analyses (PCA)**

126 The number of targeted PFAS varied between sites and sampling year, summarised in Table S4 and  
127 Table S5. The same PFAS need to be targeted in all samples that are included in a PCA in order to make  
128 a meaningful comparison. Therefore, the number of PFAS that could be included in the different PCAs  
129 differed, and was limited by the PFAS that were targeted at the different sites. The selection of the  
130 sites and PFAS for the PCA are described in the following.

131 Seven PFAS were targeted for all muscle samples: perfluorohexanoic acid (PFHxA), perfluoroheptanoic  
132 acid (PFHpA), perfluorononanoic acid (PFNA), perfluorodecanoic acid (PFDA),  
133 perfluorobutanesulfonate (PFBS), perfluorohexanesulfonate (PFHxS), and perfluorooctanesulfonate  
134 (PFOS). Perfluorobutanoic acid (PFBA) and perfluoropentanoic acid (PFPA) were analysed in most  
135 samples. PFBA was only detected in one sample (one brown trout muscle from Evenes airport), while  
136 PFPA was not detected in any sample. Therefore, these two PFAS were not included in further data  
137 analyses and interpretations. Perfluorooctanoic acid (PFOA) was targeted in all samples except for in  
138 brown trout sampled in lake Mjøsa in 2016. 6:2 fluorotelomer sulfonate (6:2 FTS) was analysed in all  
139 samples, except samples from lake Mjøsa. Perfluorodecanesulfonate (PFDS) and  
140 perfluorooctanesulfonamide (FOSA) were analysed in all samples, except those from Rygge airport.  
141 Perfluoroundecanoic acid (PFUnDA), perfluorododecanoic acid (PFDoDA), perfluorotridecanoic acid  
142 (PFTrDA), and perfluorotetradecanoic acid (PFTeDA) were analysed in all samples, except those from  
143 lake Mjøsa and Rygge airport. 8:2 FTS was targeted in all samples, except from samples from lake Mjøsa  
144 and a few samples from lake Randsfjorden.

145 23 PFAS were targeted for all liver samples: PFPA, PFHxA, PFHpA, PFOA, PFNA, PFDA, PFUnDA, PFDoDA,  
146 PFTrDA, PFTeDA, PFBS, PFHxS, PFOS, PFDS, Perfluorododecansulfonate (PFDoDS), FOSA, *N*-methyl  
147 perfluorooctanesulfonamide (MeFOSA), *N*-ethyl perfluorooctanesulfonamide (EtFOSA), *N*-methyl  
148 perfluorooctanesulfonamido ethanol (MeFOSE), *N*-ethyl perfluorooctanesulfonamido ethanol  
149 (EtFOSE), *N*-methyl perfluorooctanesulfonamido acetic acid (MeFOSAA), *N*-ethyl  
150 perfluorooctanesulfonamido acetic acid (EtFOSAA), and 6:2 FTS. Of these, six were not detected in any  
151 of the samples: PFPA, PFDoDS, MeFOSA, MeFOSE, EtFOSE, MeFOSAA. 8:2 FTS was targeted for all  
152 samples, except samples from 2014 in lake Femunden, lake Mjøsa, and lake Randsfjorden. PFBA was  
153 targeted in most samples, but not detected in any and was therefore not included in the statistical  
154 analyses.

155 **Brown trout muscle**

156 PFAS profiles in brown trout muscle were used to explore if and how PFAS fingerprints in fish affected  
157 by each of the three source types differed from each other. Brown trout muscle was the only tissue  
158 where PFAS was targeted in multiple samples covering all three source types.

159 PFOA was targeted for all brown trout muscle samples, except for brown trout sampled in lake Mjøsa  
160 in 2016. Therefore, the brown trout from lake Mjøsa in 2016 was not included in the PCA. Ten PFAS  
161 (PFHxA, PFHpA, PFOA, PFNA, PFDA, PFBS, PFHxS, PFOS, PFDS, and FOSA) were targeted for all the  
162 remaining samples of brown trout. PFHpA and PFBS were not detected in any sample and they were  
163 excluded from the analysis. Three individuals from Fagernes airport did not contain PFAS  
164 concentrations above the LOQ (0.5-1.0  $\mu\text{g kg}^{-1}$ ) and were excluded from the PCA shown in Figure S3.

165 The PCA plot (Figure S3) showed groupings according to the different sites and hence, the different  
166 sources. In the score plot, samples from AFFF impacted sites (Evenes airport and Fagernes airport)  
167 grouped to the right, while samples from the other sites plotted generally to the left of the AFFF  
168 samples. In the loading plot, PFOS plotted to the right, while PFOA and PFDA plotted to the left. This  
169 reflects the fact that the samples from AFFF impacted sites generally had higher percentages of PFOS  
170 compared to the other sites.

171 It is also clear from Figure S3 that some trout muscle samples from the different sites plotted together  
172 in the PCA. Some of the samples from the sites not expected to be directly affected by AFFF (lake  
173 Randsfjorden and lake Mjøsa) plotted together with some samples from the sites expected to be  
174 directly affected by AFFF (Evenes airport and Fagernes airport). The main reason for this was that there  
175 were few PFAS above the LOQ in many samples. PFOS was the only above the LOQ in 20 of 34 samples  
176 from Evenes airport, 29 of 43 from Fagernes airport, 31 of 121 from lake Mjøsa, 17 of 24 from lake  
177 Randsfjorden, and one of six samples from lake Tyrifjorden. Therefore, to further explore differences  
178 in trout muscle profiles depending on the sources, samples from lake Mjøsa were excluded in order to  
179 include the C11-C14 PFCA in the analysis, shown in Figure 2 in the main paper (the C11-C14 PFCA:  
180 PFUnDA; PFDoDA; PFTrDA; and PFTeDA, were targeted for all sites but lake Mjøsa). PFOA was only  
181 detected in samples from lake Mjøsa and was therefore excluded from this PCA. 6:2 FTS and 8:2 FTS  
182 were not detected in any sample and were therefore not included in the PCA. When including the C11-  
183 C14 PFCA in the analysis, a clear grouping according to the different sites were observed reflecting  
184 distinct differences in PFAS profiles between the sites (Figure 2 in the main paper).

185 **Perch muscle**

186 A similar pattern as in trout muscle was observed for PFAS profiles (ten PFAS) in perch muscle from  
187 Fagernes airport, Rygge airport and lake Tyrifjorden, shown in Figure S4. Concentrations below the  
188 LOQ and varying number of targeted PFAS between sites complicated interpretations (e.g. PFOS was  
189 the only detected PFAS in 21 of 34 samples from Fagernes airport and in two of 42 samples from lake  
190 Tyrifjorden). However, a general trend was observed where samples from the AFFF affected sites  
191 (Fagernes airport and Rygge airport) were dominated by PFOS, while samples from lake Tyrifjorden  
192 had higher percentages of PFCA.

193 Due to the fact that some PFAS (PFUnDA, PFDoDA, PFTrDA, PFTeDA, PFDS, and FOSA) were not  
194 targeted for samples from Rygge airport, a separate PCA for samples from Fagernes airport and lake  
195 Tyrifjorden (16 PFAS) was carried out, shown in Figure S5. As for trout muscle, a more distinct grouping  
196 according to percentages of PFOS (and other PFSA: PFHxS, PFHpS, and PFDS) and long chained PFCA  
197 was shown when more PFAS were included. However, PFOS was the only compound of the 16 targeted  
198 PFAS which was found at concentrations above the LOQ in 11 samples from Fagernes airport, reflecting  
199 the low concentrations in muscle tissue. PC 1 (X-axis) explained 34% of the variance. PFSA plotted to  
200 the right, while C10-C14 PFCA plotted to the left. As for trout muscle, perch muscle samples from the  
201 AFFF impacted site (Fagernes airport) grouped on the side of the plot dominated by PFOS and other  
202 PFSA (right) while samples from lake Tyrifjorden (paper industry) plotted on the side associated with  
203 long chained PFCA (left) or close to the centre. A few samples plotted low on the Y-axis (PC 2) due to  
204 having concentrations of one or several of PFHpA, PFOA, and/or PFNA above the LOQ, which were only  
205 detected in a few individuals.

## Supplementary tables

Table S1. Overview of the investigated water bodies, including the main known (and suspected) contaminant sources.

|                                                      | Location<br>(UTM33 EUREF89) |           | Volume (km <sup>3</sup> ) | Surface area<br>(km <sup>2</sup> ) | Max<br>depth (m) | Catchment area<br>(km <sup>2</sup> ) | Person<br>equivalents | Main contaminant sources                                                               |
|------------------------------------------------------|-----------------------------|-----------|---------------------------|------------------------------------|------------------|--------------------------------------|-----------------------|----------------------------------------------------------------------------------------|
| Lake Mjøsa                                           | N: 6746114                  | E: 282000 | 65                        | 369                                | 453              | 17 251                               | 200 000               | Five urban areas, major roads, (old) industry, 3 major WWTP <sup>a</sup> , agriculture |
| Lake Femunden                                        | N: 6898700                  | E: 338500 | 6                         | 203                                | 153              | 1 790                                | ~200                  | Long range transport                                                                   |
| Lake Randsfjorden                                    | N: 6717603                  | E: 244543 | 7                         | 140                                | 131              | 3 700                                | 29 000                | Long range transport (Rural areas, agriculture, roads)                                 |
| Lake Tyrifjorden                                     | N: 6642656                  | E: 554074 | 13                        | 138                                | 288              | 9 900                                | 35 000                | Paper industry, urban areas, agriculture                                               |
| Lake Vansjø (Rygge airport)                          | N: 6590832                  | E: 263411 | 0.3                       | 36                                 | 35               | 680                                  | 30 000                | Military/civil airport, fire training facility, agriculture                            |
| Lake Lavangsvatnet (Evenes airport)                  | N: 7599017                  | E: 568141 | -                         | 1.60                               |                  | 76                                   | -                     | Evenes airport, fire training facility                                                 |
| Lake Langvatnet (Evenes airport)                     | N: 7599400                  | E: 569040 |                           | 0.9                                |                  | 76                                   |                       | Evenes airport, fire training facility, outlet to Lavangsvatnet                        |
| Lake Leirin, included lake Kalken (Fagernes airport) | N: 6778672                  | E: 568141 |                           | 1.70                               |                  | 35                                   |                       | Fagernes airport, fire training facility                                               |
| River Leira (Oslo airport)                           | N: 6676300                  | E: 281245 |                           | Length: 101 km                     |                  | 670                                  |                       | Oslo airport, (agriculture)                                                            |

WWTP: wastewater treatment plant



Table S2. Number of samples (liver and muscle) of different fish species at the different sites.

| PFAS source   |                             | AFFF           |                  |                     |                  | Paper industry | Diffuse              | Long-range transport |                     |
|---------------|-----------------------------|----------------|------------------|---------------------|------------------|----------------|----------------------|----------------------|---------------------|
| Site          | Oslo Airport                | Evenes Airport | Fagernes Airport | Rygge Airport       | Lake Tyrifjorden | Lake Mjøsa     | Lake Femunden        | Lake Randsfjorden    |                     |
| <i>Liver</i>  |                             |                |                  |                     |                  |                |                      |                      |                     |
| Species       | Arctic char                 |                |                  |                     |                  | 1              |                      |                      | 7                   |
|               | Bream                       |                |                  |                     |                  | 2              |                      |                      |                     |
|               | Brown trout                 |                |                  |                     |                  | 6              | 84                   | 66                   | 34                  |
|               | E. smelt <sup>a</sup>       |                |                  |                     |                  |                | 61                   |                      | 28                  |
|               | Perch                       |                |                  |                     | 15               | 42             |                      |                      |                     |
|               | Pike                        |                |                  |                     |                  | 14             |                      |                      |                     |
|               | Roach                       |                |                  |                     |                  | 8              |                      |                      |                     |
|               | Vendace                     |                |                  |                     |                  |                | 37                   |                      |                     |
|               | Whitefish                   |                |                  |                     |                  | 13             |                      | 36                   |                     |
| <i>Muscle</i> |                             |                |                  |                     |                  |                |                      |                      |                     |
| Species       | Arctic char                 |                | 15               |                     |                  | 1              |                      |                      | 1                   |
|               | Brown trout                 |                | 34               | 46 (3) <sup>c</sup> |                  | 6              | 125                  |                      | 24                  |
|               | E. smelt <sup>a</sup>       |                |                  |                     |                  |                | 120 (1) <sup>c</sup> |                      | 21 (7) <sup>c</sup> |
|               | Perch                       |                |                  | 34                  | 16               | 42             |                      |                      |                     |
|               | Pike                        | 2              |                  |                     | 14               | 14             |                      |                      |                     |
|               | <i>E. chub</i> <sup>b</sup> | 1              |                  |                     |                  |                |                      |                      |                     |
|               | Whitefish                   |                |                  | 30 (2) <sup>c</sup> |                  |                |                      | 24 (23) <sup>c</sup> |                     |
|               | Zander                      |                |                  |                     | 11               |                |                      |                      |                     |

<sup>a</sup> *European smelt*

<sup>b</sup> *European chub*

<sup>c</sup> *Numbers inside brackets () are the number of samples where PFAS were not detected*

Table S3. Full name and abbreviations for the per- and polyfluorinated alkyl substances (PFAS) included in the present study <sup>a</sup>

| Full name                                               | Abbreviation | LOQ (NIVA analyses) |
|---------------------------------------------------------|--------------|---------------------|
| Perfluorobutanoic acid                                  | PFBA         | 1.0                 |
| Perfluoropentanoic acid                                 | PFPA         | 0.5                 |
| Perfluorohexanoic acid                                  | PFHxA        | 0.5                 |
| Perfluoroheptanoic acid                                 | PFHpA        | 0.5                 |
| Perfluorooctanoic acid                                  | PFOA         | 0.5                 |
| Perfluorononanoic acid                                  | PFNA         | 0.4                 |
| Perfluorodecanoic acid                                  | PFDA         | 0.4                 |
| Perfluoroundecanoic acid                                | PFUnDA       | 0.4                 |
| Perfluorododecanoic acid                                | PFDoDA       | 0.4                 |
| Perfluorotridecanoic acid                               | PFTTrDA      | 0.4                 |
| Perfluorotetradecanoic acid                             | PFTeDA       | 0.4                 |
| Perfluoropentadecanoic acid <sup>b, c</sup>             | PFPeDA       | 0.4                 |
| Perfluorohexadecanoic acid                              | PFHxDA       | 0.4                 |
| Perfluorobutanesulfonate                                | PFBS         | 0.1                 |
| Perfluoropentanesulfonate                               | PFPeS        | 0.1                 |
| Perfluorohexanesulfonate                                | PFHxS        | 0.1                 |
| Perfluoroheptanesulfonate                               | PFHpS        | 0.1                 |
| Linear perfluorooctanesulfonate                         | PFOS         | 0.1                 |
| Branched perfluorooctanesulfonate isomers <sup>d</sup>  | Br-PFOS      | 0.2                 |
| Perfluorononanesulfonate                                | PFNS         | 0.1                 |
| Perfluorodecanesulfonate                                | PFDS         | 0.1                 |
| Perfluorododecansulfonate                               | PFDoDS       | 0.2                 |
| Perfluorooctanesulfonamide                              | FOSA         | 0.1                 |
| <i>N</i> -methyl perfluorooctanesulfonamide             | MeFOSA       | 0.2                 |
| <i>N</i> -ethyl perfluorooctanesulfonamide              | EtFOSA       | 0.2                 |
| <i>N</i> -methyl perfluorooctanesulfonamido ethanol     | MeFOSE       | 2.0                 |
| <i>N</i> -ethyl perfluorooctanesulfonamido ethanol      | EtFOSE       | 2.0                 |
| Perfluorooctanesulfonamido acetic acid                  | FOSAA        | 0.3                 |
| <i>N</i> -methyl perfluorooctanesulfonamido acetic acid | MeFOSAA      | 0.3                 |
| <i>N</i> -ethyl perfluorooctanesulfonamido acetic acid  | EtFOSAA      | 0.3                 |

| Full name                                         | Abbreviation | LOQ (NIVA analyses) |
|---------------------------------------------------|--------------|---------------------|
| 4:2 fluorotelomer sulfonate                       | 4:2 FTS      | 0.3                 |
| 6:2 fluorotelomer sulfonate                       | 6:2 FTS      | 0.3                 |
| 8:2 fluorotelomer sulfonate                       | 8:2 FTS      | 0.3                 |
| 10:2 fluorotelomer sulfonate                      | 10:2 FTS     | 0.3                 |
| 12:2 fluorotelomer sulfonate                      | 12:2 FTS     | 0.3                 |
| 14:2 fluorotelomer sulfonate                      | 14:2 FTS     | 0.3                 |
| Perfluoro(3,7-dimethyloctanoic acid) <sup>e</sup> | PF-3,7-DMOA  |                     |
| 7H-Dodecafluoroheptanoic acid <sup>e</sup>        | HPFHpA       |                     |

<sup>a</sup> PFAS that were targeted or screened for, but not detected in Langberg et al. (2020) are not included.

<sup>b</sup> For analyses at NIVA: standard was not available, detected using exact mass and estimated retention time.

<sup>c</sup> For analyses at NIVA: quantified using the standard for PFHxDA.

<sup>d</sup> For analyses at NIVA: quantified using the standard for linear PFOS.

<sup>e</sup> Not analysed at NIVA

Table S4. Targeted PFAS in muscle samples at the different sites and species (X marks targeted PFAS).

| Site     | Lake/stream/<br>year | Species        | Latin                      | PFBA | PFPA | PFHxA | PFHpA | PFOA | PFNA | PFDA | PFUnDA | PFDoDA | PFTTrDA | PFTeDA | PFPeDA | PFHxDA | PFBS | PFPeS | PFHxS | PFHpS | PFOS | Br-<br>PFOS |
|----------|----------------------|----------------|----------------------------|------|------|-------|-------|------|------|------|--------|--------|---------|--------|--------|--------|------|-------|-------|-------|------|-------------|
| Evenes   | Langvatnet/2019      | Arctic char    | <i>Salvelinus alpinus</i>  | X    | X    | X     | X     | X    | X    | X    | X      | X      | X       | X      |        |        | X    |       | X     | X     | X    |             |
| Evenes   | Lavangsvatnet/2019   | Arctic char    | <i>Salvelinus alpinus</i>  | X    | X    | X     | X     | X    | X    | X    | X      | X      | X       | X      |        |        | X    |       | X     | X     | X    |             |
| Evenes   | Kjerkvatnet/2019     | Brown Trout    | <i>Salmo trutta</i>        | X    | X    | X     | X     | X    | X    | X    | X      | X      | X       | X      |        |        | X    |       | X     | X     | X    |             |
| Evenes   | Lavangsvatnet/2019   | Brown Trout    | <i>Salmo trutta</i>        | X    | X    | X     | X     | X    | X    | X    | X      | X      | X       | X      |        |        | X    |       | X     | X     | X    |             |
| Fagernes | Kalken/2018          | Brown Trout    | <i>Salmo trutta</i>        | X    | X    | X     | X     | X    | X    | X    | X      | X      | X       | X      |        |        | X    |       | X     | X     | X    |             |
| Fagernes | Storfjorden/2018     | Brown Trout    | <i>Salmo trutta</i>        | X    | X    | X     | X     | X    | X    | X    | X      | X      | X       | X      |        |        | X    |       | X     | X     | X    |             |
| Fagernes | Leirin midt/2018     | Brown Trout    | <i>Salmo trutta</i>        | X    | X    | X     | X     | X    | X    | X    | X      | X      | X       | X      |        |        | X    |       | X     | X     | X    |             |
| Fagernes | Susfjorden/2018      | Brown Trout    | <i>Salmo trutta</i>        | X    | X    | X     | X     | X    | X    | X    | X      | X      | X       | X      |        |        | X    |       | X     | X     | X    |             |
| Fagernes | Kalken/2018          | Perch          | <i>Perca fluviatilis</i>   | X    | X    | X     | X     | X    | X    | X    | X      | X      | X       | X      |        |        | X    |       | X     | X     | X    |             |
| Fagernes | Storfjorden/2018     | Perch          | <i>Perca fluviatilis</i>   | X    | X    | X     | X     | X    | X    | X    | X      | X      | X       | X      |        |        | X    |       | X     | X     | X    |             |
| Fagernes | Leirin midt/2018     | Perch          | <i>Perca fluviatilis</i>   | X    | X    | X     | X     | X    | X    | X    | X      | X      | X       | X      |        |        | X    |       | X     | X     | X    |             |
| Fagernes | Kalken/2018          | Whitefish      | <i>Coregonus lavaretus</i> | X    | X    | X     | X     | X    | X    | X    | X      | X      | X       | X      |        |        | X    |       | X     | X     | X    |             |
| Fagernes | Storfjorden/2018     | Whitefish      | <i>Coregonus lavaretus</i> | X    | X    | X     | X     | X    | X    | X    | X      | X      | X       | X      |        |        | X    |       | X     | X     | X    |             |
| Fagernes | Leirin midt/2018     | Whitefish      | <i>Coregonus lavaretus</i> | X    | X    | X     | X     | X    | X    | X    | X      | X      | X       | X      |        |        | X    |       | X     | X     | X    |             |
| Femunden | Femunden/2013-2016   | Whitefish      | <i>Coregonus lavaretus</i> |      | X    | X     | X     | X    | X    | X    | X      | X      | X       | X      | X      |        | X    | X     | X     | X     | X    |             |
| Mjøsa    | 2009                 | Brown trout    | <i>Salmo trutta</i>        | X    |      | X     | X     | X    | X    | X    | X      |        |         |        |        |        | X    |       | X     |       | X    |             |
| Mjøsa    | 2010                 | Brown trout    | <i>Salmo trutta</i>        | X    |      | X     | X     | X    | X    | X    | X      |        |         |        |        |        | X    |       | X     |       | X    |             |
| Mjøsa    | 2011                 | Brown trout    | <i>Salmo trutta</i>        | X    |      | X     | X     | X    | X    | X    | X      |        |         |        |        |        | X    |       | X     |       | X    |             |
| Mjøsa    | 2012                 | Brown trout    | <i>Salmo trutta</i>        | X    |      | X     | X     | X    | X    | X    | X      |        |         |        |        |        | X    |       | X     |       | X    |             |
| Mjøsa    | 2008                 | Brown trout    | <i>Salmo trutta</i>        | X    |      | X     | X     | X    | X    | X    | X      |        |         |        |        |        | X    |       | X     |       | X    |             |
| Mjøsa    | 2013                 | Brown trout    | <i>Salmo trutta</i>        | X    |      |       | X     | X    | X    | X    | X      |        |         |        |        |        | X    |       | X     |       | X    |             |
| Mjøsa    | 2014                 | Brown trout    | <i>Salmo trutta</i>        |      |      | X     | X     | X    | X    | X    | X      |        |         |        |        |        | X    |       | X     |       | X    |             |
| Mjøsa    | 2015                 | Brown trout    | <i>Salmo trutta</i>        |      |      | X     | X     | X    | X    | X    | X      |        |         |        |        |        | X    |       | X     |       | X    |             |
| Mjøsa    | 2016                 | Brown trout    | <i>Salmo trutta</i>        |      |      | X     | X     |      | X    | X    | X      |        |         |        |        |        | X    |       | X     |       | X    |             |
| Mjøsa    | 2009                 | European smelt | <i>Osmerus eperlanus</i>   | X    |      | X     | X     | X    | X    | X    | X      |        |         |        |        |        | X    |       | X     |       | X    |             |
| Mjøsa    | 2010                 | European smelt | <i>Osmerus eperlanus</i>   | X    |      | X     | X     | X    | X    | X    | X      |        |         |        |        |        | X    |       | X     |       | X    |             |
| Mjøsa    | 2011                 | European smelt | <i>Osmerus eperlanus</i>   | X    |      | X     | X     | X    | X    | X    | X      |        |         |        |        |        | X    |       | X     |       | X    |             |
| Mjøsa    | 2012                 | European smelt | <i>Osmerus eperlanus</i>   | X    |      | X     | X     | X    | X    | X    | X      |        |         |        |        |        | X    |       | X     |       | X    |             |
| Mjøsa    | 2008                 | European smelt | <i>Osmerus eperlanus</i>   |      |      | X     | X     | X    | X    | X    | X      |        |         |        |        |        | X    |       | X     |       | X    |             |
| Mjøsa    | 2013                 | European smelt | <i>Osmerus eperlanus</i>   | X    |      | X     | X     | X    | X    | X    | X      |        |         |        |        |        | X    |       | X     |       | X    |             |
| Mjøsa    | 2014                 | European smelt | <i>Osmerus eperlanus</i>   |      |      | X     | X     | X    | X    | X    | X      |        |         |        |        |        | X    |       | X     |       | X    |             |

| Site                     | Lake/stream/<br>year | Species           | Latin                     | PFBA | PFPA | PFHxA | PFHpA | PFOA | PFNA | PFDA | PFUnDA | PFDoDA | PFTTrDA | PFTeDA | PFPeDA | PFHxDA | PFBS | PFPeS | PFHxS | PFHpS | PFOS | Br-<br>PFOS |
|--------------------------|----------------------|-------------------|---------------------------|------|------|-------|-------|------|------|------|--------|--------|---------|--------|--------|--------|------|-------|-------|-------|------|-------------|
| Mjøsa                    | 2015                 | European smelt    | <i>Osmerus eperlanus</i>  |      |      | X     | X     | X    | X    | X    | X      |        |         |        |        |        | X    |       | X     |       | X    |             |
| Oslo airport             | Leira/2018           | Pike              | <i>Esox lucius</i>        | X    | X    | X     | X     | X    | X    | X    | X      | X      | X       | X      |        |        | X    |       | X     | X     | X    |             |
| Oslo airport             | Leira/2018           | Squalius cephalus | <i>Squalius cephalus</i>  | X    | X    | X     | X     | X    | X    | X    | X      | X      | X       | X      |        |        | X    |       | X     | X     | X    |             |
| Randsfjorden             | 2015                 | Arctic char       | <i>Salvelinus alpinus</i> | X    | X    | X     | X     | X    | X    | X    | X      | X      | X       | X      |        |        | X    |       | X     |       | X    |             |
| Randsfjorden             | 2016                 | Brown trout       | <i>Salmo trutta</i>       | X    | X    | X     | X     | X    | X    | X    | X      | X      | X       | X      | X      | X      | X    | X     | X     | X     | X    |             |
| Randsfjorden             | 2015                 | Brown trout       | <i>Salmo trutta</i>       | X    | X    | X     | X     | X    | X    | X    | X      | X      | X       | X      |        |        | X    | X     | X     | X     | X    |             |
| Randsfjorden             | 2014                 | Brown trout       | <i>Salmo trutta</i>       | X    | X    | X     | X     | X    | X    | X    | X      | X      | X       | X      |        |        | X    |       | X     |       | X    |             |
| Randsfjorden             | 2013                 | Brown trout       | <i>Salmo trutta</i>       | X    | X    | X     | X     | X    | X    | X    | X      | X      | X       | X      |        |        | X    |       | X     |       | X    |             |
| Randsfjorden             | 2016                 | European smelt    | <i>Osmerus eperlanus</i>  | X    | X    | X     | X     | X    | X    | X    | X      | X      | X       | X      | X      | X      | X    | X     | X     | X     | X    |             |
| Randsfjorden             | 2014                 | European smelt    | <i>Osmerus eperlanus</i>  | X    | X    | X     | X     | X    | X    | X    | X      | X      | X       | X      |        |        | X    |       | X     |       | X    |             |
| Randsfjorden             | 2013                 | European smelt    | <i>Osmerus eperlanus</i>  | X    | X    | X     | X     | X    | X    | X    | X      | X      | X       | X      |        |        | X    |       | X     |       | X    |             |
| Tyrifjorden <sup>a</sup> | Tyrifjorden/2018     | Arctic char       | <i>Salvelinus alpinus</i> | X    | X    | X     | X     | X    | X    | X    | X      | X      | X       | X      | X      | X      | X    | X     | X     | X     | X    | X           |
| Tyrifjorden <sup>a</sup> | Tyrifjorden/2018     | Brown Trout       | <i>Salmo trutta</i>       | X    | X    | X     | X     | X    | X    | X    | X      | X      | X       | X      | X      | X      | X    | X     | X     | X     | X    | X           |
| Tyrifjorden <sup>a</sup> | Tyrifjorden/2018     | Perch             | <i>Perca fluviatilis</i>  | X    | X    | X     | X     | X    | X    | X    | X      | X      | X       | X      | X      | X      | X    | X     | X     | X     | X    | X           |
| Tyrifjorden <sup>a</sup> | Tyrifjorden/2018     | Pike              | <i>Esox lucius</i>        | X    | X    | X     | X     | X    | X    | X    | X      | X      | X       | X      | X      | X      | X    | X     | X     | X     | X    | X           |
| Rygge airport            | Lake Vansjø/2013     | Perch             | <i>Perca fluviatilis</i>  | X    | X    | X     | X     | X    | X    | X    |        |        |         |        |        |        | X    |       | X     |       | X    |             |
| Rygge airport            | Lake Vansjø/2013     | Pike              | <i>Esox lucius</i>        | X    | X    | X     | X     | X    | X    | X    |        |        |         |        |        |        | X    |       | X     |       | X    |             |
| Rygge airport            | Lake Vansjø/2013     | Zander            | <i>Sander lucioperca</i>  | X    | X    | X     | X     | X    | X    | X    |        |        |         |        |        |        | X    |       | X     |       | X    |             |
| Oslo airport             | Leira/2018           | Brown trout       | <i>Salmo trutta</i>       | X    | X    | X     | X     | X    | X    | X    | X      | X      | X       | X      |        |        | X    |       | X     | X     | X    |             |
| Oslo airport             | Sogna/2018           | Brown trout       | <i>Salmo trutta</i>       | X    | X    | X     | X     | X    | X    | X    | X      | X      | X       | X      |        |        | X    |       | X     | X     | X    |             |

<sup>a</sup> PFAS analysed/screened for in lake Tyrifjorden (Langberg *et al.*, 2020), but not detected are not included in the table.

Table S4 (continuation, showing remaining PFAS). Targeted PFAS in muscle samples at the different sites and species (X marks targeted PFAS).

| Site     | Lake/stream/<br>year | Species        | Latin                      | PFNS | PFDS | PFD <sub>o</sub> DS | FOSA | MeFOSA | EtFOSA | MeFOSE | EtFOSE | FOSAA | MeFOSAA | EtFOSAA | 4:2<br>FTS | 6:2<br>FTS | 8:2<br>FTS | 10:2<br>FTS | 12:2<br>FTS | 14:2<br>FTS | PF-3,7-<br>DMOA | HPFH <sub>p</sub> A |
|----------|----------------------|----------------|----------------------------|------|------|---------------------|------|--------|--------|--------|--------|-------|---------|---------|------------|------------|------------|-------------|-------------|-------------|-----------------|---------------------|
| Evenes   | Langvatnet/2019      | Arctic char    | <i>Salvelinus alpinus</i>  |      | X    |                     | X    |        |        |        |        |       |         |         | X          | X          | X          |             |             |             | X               | X                   |
| Evenes   | Lavangsvatnet/2019   | Arctic char    | <i>Salvelinus alpinus</i>  |      | X    |                     | X    |        |        |        |        |       |         |         | X          | X          | X          |             |             |             | X               | X                   |
| Evenes   | Kjerkvatnet/2019     | Brown Trout    | <i>Salmo trutta</i>        |      | X    |                     | X    |        |        |        |        |       |         |         | X          | X          | X          |             |             |             | X               | X                   |
| Evenes   | Lavangsvatnet/2019   | Brown Trout    | <i>Salmo trutta</i>        |      | X    |                     | X    |        |        |        |        |       |         |         | X          | X          | X          |             |             |             | X               | X                   |
| Fagernes | Kalken/2018          | Brown Trout    | <i>Salmo trutta</i>        |      | X    |                     | X    |        |        |        |        |       |         |         | X          | X          | X          |             |             |             | X               | X                   |
| Fagernes | Storfjorden/2018     | Brown Trout    | <i>Salmo trutta</i>        |      | X    |                     | X    |        |        |        |        |       |         |         | X          | X          | X          |             |             |             | X               | X                   |
| Fagernes | Leirin midt/2018     | Brown Trout    | <i>Salmo trutta</i>        |      | X    |                     | X    |        |        |        |        |       |         |         | X          | X          | X          |             |             |             | X               | X                   |
| Fagernes | Susfjorden/2018      | Brown Trout    | <i>Salmo trutta</i>        |      | X    |                     | X    |        |        |        |        |       |         |         | X          | X          | X          |             |             |             | X               | X                   |
| Fagernes | Kalken/2018          | Perch          | <i>Perca fluviatilis</i>   |      | X    |                     | X    |        |        |        |        |       |         |         | X          | X          | X          |             |             |             | X               | X                   |
| Fagernes | Storfjorden/2018     | Perch          | <i>Perca fluviatilis</i>   |      | X    |                     | X    |        |        |        |        |       |         |         | X          | X          | X          |             |             |             | X               | X                   |
| Fagernes | Leirin midt/2018     | Perch          | <i>Perca fluviatilis</i>   |      | X    |                     | X    |        |        |        |        |       |         |         | X          | X          | X          |             |             |             | X               | X                   |
| Fagernes | Kalken/2018          | Whitefish      | <i>Coregonus lavaretus</i> |      | X    |                     | X    |        |        |        |        |       |         |         | X          | X          | X          |             |             |             | X               | X                   |
| Fagernes | Storfjorden/2018     | Whitefish      | <i>Coregonus lavaretus</i> |      | X    |                     | X    |        |        |        |        |       |         |         | X          | X          | X          |             |             |             | X               | X                   |
| Fagernes | Leirin midt/2018     | Whitefish      | <i>Coregonus lavaretus</i> |      | X    |                     | X    |        |        |        |        |       |         |         | X          | X          | X          |             |             |             | X               | X                   |
| Femunden | Femunden/2013-2016   | Whitefish      | <i>Coregonus lavaretus</i> | X    | X    | X                   | X    | X      | X      | X      | X      |       | X       | X       | X          | X          | X          |             |             |             |                 |                     |
| Mjøsa    | 2009                 | Brown trout    | <i>Salmo trutta</i>        |      | X    |                     | X    |        |        |        |        |       |         |         |            |            |            |             |             |             |                 |                     |
| Mjøsa    | 2010                 | Brown trout    | <i>Salmo trutta</i>        |      | X    |                     | X    |        |        |        |        |       |         |         |            |            |            |             |             |             |                 |                     |
| Mjøsa    | 2011                 | Brown trout    | <i>Salmo trutta</i>        |      | X    |                     | X    |        |        |        |        |       |         |         |            |            |            |             |             |             |                 |                     |
| Mjøsa    | 2012                 | Brown trout    | <i>Salmo trutta</i>        |      | X    |                     | X    |        |        |        |        |       |         |         |            |            |            |             |             |             |                 |                     |
| Mjøsa    | 2008                 | Brown trout    | <i>Salmo trutta</i>        |      | X    |                     | X    |        |        |        |        |       |         |         |            |            |            |             |             |             |                 |                     |
| Mjøsa    | 2013                 | Brown trout    | <i>Salmo trutta</i>        |      | X    |                     | X    |        |        |        |        |       |         |         |            |            |            |             |             |             |                 |                     |
| Mjøsa    | 2014                 | Brown trout    | <i>Salmo trutta</i>        |      | X    |                     | X    |        |        |        |        |       |         |         |            |            |            |             |             |             |                 |                     |
| Mjøsa    | 2015                 | Brown trout    | <i>Salmo trutta</i>        |      | X    |                     | X    |        |        |        |        |       |         |         |            |            |            |             |             |             |                 |                     |
| Mjøsa    | 2016                 | Brown trout    | <i>Salmo trutta</i>        |      | X    |                     | X    |        |        |        |        |       |         |         |            |            |            |             |             |             |                 |                     |
| Mjøsa    | 2009                 | European smelt | <i>Osmerus eperlanus</i>   |      | X    |                     | X    |        |        |        |        |       |         |         |            |            |            |             |             |             |                 |                     |
| Mjøsa    | 2010                 | European smelt | <i>Osmerus eperlanus</i>   |      | X    |                     | X    |        |        |        |        |       |         |         |            |            |            |             |             |             |                 |                     |
| Mjøsa    | 2011                 | European smelt | <i>Osmerus eperlanus</i>   |      | X    |                     | X    |        |        |        |        |       |         |         |            |            |            |             |             |             |                 |                     |
| Mjøsa    | 2012                 | European smelt | <i>Osmerus eperlanus</i>   |      | X    |                     | X    |        |        |        |        |       |         |         |            |            |            |             |             |             |                 |                     |
| Mjøsa    | 2008                 | European smelt | <i>Osmerus eperlanus</i>   |      | X    |                     | X    |        |        |        |        |       |         |         |            |            |            |             |             |             |                 |                     |

| Site                     | Lake/stream/<br>year | Species           | Latin                     | PFNS | PFDS | PFDoS | FOSA | MeFOSA | EtFOSA | MeFOSE | EtFOSE | FOSAA | MeFOSAA | EtFOSAA | 4:2 FTS | 6:2 FTS | 8:2 FTS | 10:2 FTS | 12:2 FTS | 14:2 FTS | PF-3,7-<br>DMOA | HPFHpA |
|--------------------------|----------------------|-------------------|---------------------------|------|------|-------|------|--------|--------|--------|--------|-------|---------|---------|---------|---------|---------|----------|----------|----------|-----------------|--------|
| Mjøsa                    | 2013                 | European smelt    | <i>Osmerus eperlanus</i>  |      | X    |       | X    |        |        |        |        |       |         |         |         |         |         |          |          |          |                 |        |
| Mjøsa                    | 2014                 | European smelt    | <i>Osmerus eperlanus</i>  |      | X    |       | X    |        |        |        |        |       |         |         |         |         |         |          |          |          |                 |        |
| Mjøsa                    | 2015                 | European smelt    | <i>Osmerus eperlanus</i>  |      | X    |       | X    |        |        |        |        |       |         |         |         |         |         |          |          |          |                 |        |
| Oslo airport             | Leira/2018           | Pike              | <i>Esox lucius</i>        |      | X    |       | X    |        |        |        |        |       |         |         | X       | X       | X       |          |          |          | X               | X      |
| Oslo airport             | Leira/2018           | Squalius cephalus | <i>Squalius cephalus</i>  |      | X    |       | X    |        |        |        |        |       |         |         | X       | X       | X       |          |          |          | X               | X      |
| Randsfjorden             | 2015                 | Arctic char       | <i>Salvelinus alpinus</i> |      | X    | X     | X    | X      | X      | X      | X      |       | X       | X       |         |         | X       | X        |          |          |                 |        |
| Randsfjorden             | 2016                 | Brown trout       | <i>Salmo trutta</i>       | X    | X    | X     | X    | X      | X      | X      | X      |       | X       | X       | X       | X       | X       |          |          |          |                 |        |
| Randsfjorden             | 2015                 | Brown trout       | <i>Salmo trutta</i>       |      | X    | X     | X    | X      | X      | X      | X      |       | X       | X       |         |         | X       | X        |          |          |                 |        |
| Randsfjorden             | 2014                 | Brown trout       | <i>Salmo trutta</i>       |      | X    | X     | X    | X      | X      | X      | X      |       | X       | X       |         |         | X       |          |          |          |                 |        |
| Randsfjorden             | 2013                 | Brown trout       | <i>Salmo trutta</i>       | X    | X    | X     | X    | X      | X      | X      | X      |       |         |         |         |         | X       |          |          |          |                 |        |
| Randsfjorden             | 2016                 | European smelt    | <i>Osmerus eperlanus</i>  | X    | X    | X     | X    | X      | X      | X      | X      |       | X       | X       | X       | X       | X       |          |          |          |                 |        |
| Randsfjorden             | 2014                 | European smelt    | <i>Osmerus eperlanus</i>  |      | X    | X     | X    | X      | X      | X      | X      |       | X       | X       |         |         | X       |          |          |          |                 |        |
| Randsfjorden             | 2013                 | European smelt    | <i>Osmerus eperlanus</i>  | X    | X    | X     | X    | X      | X      | X      | X      |       |         |         |         |         | X       |          |          |          |                 |        |
| Tyrifjorden <sup>a</sup> | 2018                 | Arctic char       | <i>Salvelinus alpinus</i> | X    | X    | X     | X    | X      | X      | X      | X      | X     | X       | X       | X       | X       | X       | X        | X        | X        | X               | X      |
| Tyrifjorden <sup>a</sup> | 2018                 | Brown Trout       | <i>Salmo trutta</i>       | X    | X    | X     | X    | X      | X      | X      | X      | X     | X       | X       | X       | X       | X       | X        | X        | X        | X               | X      |
| Tyrifjorden <sup>a</sup> | 2018                 | Perch             | <i>Perca fluviatilis</i>  | X    | X    | X     | X    | X      | X      | X      | X      | X     | X       | X       | X       | X       | X       | X        | X        | X        | X               | X      |
| Tyrifjorden <sup>a</sup> | 2018                 | Pike              | <i>Esox lucius</i>        | X    | X    | X     | X    | X      | X      | X      | X      | X     | X       | X       | X       | X       | X       | X        | X        | X        | X               | X      |
| Rygge airport            | 2013                 | Perch             | <i>Perca fluviatilis</i>  |      |      |       |      |        |        |        |        |       |         |         |         | X       | X       |          |          |          |                 |        |
| Rygge airport            | 2013                 | Pike              | <i>Esox lucius</i>        |      |      |       |      |        |        |        |        |       |         |         |         | X       | X       |          |          |          |                 |        |
| Rygge airport            | 2013                 | Zander            | <i>Sander lucioperca</i>  |      |      |       |      |        |        |        |        |       |         |         |         | X       | X       |          |          |          |                 |        |

<sup>a</sup> PFAS analysed/screened for in lake Tyrifjorden (Langberg *et al.*, 2020), but not detected are not included in the table.

Table S5. Targeted PFAS in liver samples at the different sites and species (X marks Targeted PFAS).

| Site         | Year | Species        | Latin                      | PFBA | PFPA | PFHxA | PFHpA | PFOA | PFNA | PFDA | PFUnDA | PFDoDA | PFTrDA | PFTeDA | PFPeDA | PFHxD | PFBS | PFPeS | PFHxS | PFHpS | PFOS | Br-PFOS |
|--------------|------|----------------|----------------------------|------|------|-------|-------|------|------|------|--------|--------|--------|--------|--------|-------|------|-------|-------|-------|------|---------|
| Femunden     | 2014 | Brown trout    | <i>Salmo trutta</i>        | X    | X    | X     | X     | X    | X    | X    | X      | X      | X      | X      |        | X     |      | X     |       | X     |      |         |
| Femunden     | 2015 | Brown trout    | <i>Salmo trutta</i>        | X    | X    | X     | X     | X    | X    | X    | X      | X      | X      | X      |        | X     |      | X     |       | X     |      |         |
| Femunden     | 2016 | Brown trout    | <i>Salmo trutta</i>        | X    | X    | X     | X     | X    | X    | X    | X      | X      | X      | X      | X      | X     | X    | X     | X     | X     | X    | X       |
| Femunden     | 2017 | Brown trout    | <i>Salmo trutta</i>        | X    | X    | X     | X     | X    | X    | X    | X      | X      | X      | X      | X      | X     | X    | X     | X     | X     | X    | X       |
| Femunden     | 2018 | Brown trout    | <i>Salmo trutta</i>        | X    | X    | X     | X     | X    | X    | X    | X      | X      | X      | X      | X      | X     | X    | X     | X     | X     | X    | X       |
| Femunden     | 2019 | Brown trout    | <i>Salmo trutta</i>        | X    | X    | X     | X     | X    | X    | X    | X      | X      | X      | X      | X      | X     | X    | X     | X     | X     | X    | X       |
| Femunden     | 2014 | Whitefish      | <i>Coregonus lavaretus</i> | X    | X    | X     | X     | X    | X    | X    | X      | X      | X      | X      |        | X     |      | X     |       | X     |      |         |
| Femunden     | 2015 | Whitefish      | <i>Coregonus lavaretus</i> | X    | X    | X     | X     | X    | X    | X    | X      | X      | X      | X      |        | X     |      | X     |       | X     |      |         |
| Femunden     | 2016 | Whitefish      | <i>Coregonus lavaretus</i> | X    | X    | X     | X     | X    | X    | X    | X      | X      | X      | X      | X      | X     | X    | X     | X     | X     | X    | X       |
| Mjøsa        | 2014 | Brown trout    | <i>Salmo trutta</i>        | X    | X    | X     | X     | X    | X    | X    | X      | X      | X      | X      |        | X     |      | X     |       | X     |      |         |
| Mjøsa        | 2015 | Brown trout    | <i>Salmo trutta</i>        | X    | X    | X     | X     | X    | X    | X    | X      | X      | X      | X      |        | X     |      | X     |       | X     |      |         |
| Mjøsa        | 2016 | Brown trout    | <i>Salmo trutta</i>        | X    | X    | X     | X     | X    | X    | X    | X      | X      | X      | X      | X      | X     | X    | X     | X     | X     | X    | X       |
| Mjøsa        | 2017 | Brown trout    | <i>Salmo trutta</i>        | X    | X    | X     | X     | X    | X    | X    | X      | X      | X      | X      | X      | X     | X    | X     | X     | X     | X    | X       |
| Mjøsa        | 2018 | Brown trout    | <i>Salmo trutta</i>        | X    | X    | X     | X     | X    | X    | X    | X      | X      | X      | X      | X      | X     | X    | X     | X     | X     | X    | X       |
| Mjøsa        | 2019 | Brown trout    | <i>Salmo trutta</i>        | X    | X    | X     | X     | X    | X    | X    | X      | X      | X      | X      | X      | X     | X    | X     | X     | X     | X    | X       |
| Mjøsa        | 2014 | European smelt | <i>Osmerus eperlanus</i>   | X    | X    | X     | X     | X    | X    | X    | X      | X      | X      | X      |        | X     |      | X     |       | X     |      |         |
| Mjøsa        | 2015 | European smelt | <i>Osmerus eperlanus</i>   | X    | X    | X     | X     | X    | X    | X    | X      | X      | X      | X      |        | X     |      | X     |       | X     |      |         |
| Mjøsa        | 2016 | European smelt | <i>Osmerus eperlanus</i>   | X    | X    | X     | X     | X    | X    | X    | X      | X      | X      | X      | X      | X     | X    | X     | X     | X     | X    | X       |
| Mjøsa        | 2017 | European smelt | <i>Osmerus eperlanus</i>   | X    | X    | X     | X     | X    | X    | X    | X      | X      | X      | X      | X      | X     | X    | X     | X     | X     | X    | X       |
| Mjøsa        | 2018 | European smelt | <i>Osmerus eperlanus</i>   | X    | X    | X     | X     | X    | X    | X    | X      | X      | X      | X      | X      | X     | X    | X     | X     | X     | X    | X       |
| Mjøsa        | 2019 | European smelt | <i>Osmerus eperlanus</i>   | X    | X    | X     | X     | X    | X    | X    | X      | X      | X      | X      | X      | X     | X    | X     | X     | X     | X    | X       |
| Mjøsa        | 2014 | Vendace        | <i>Coregonus albula</i>    | X    | X    | X     | X     | X    | X    | X    | X      | X      | X      | X      |        | X     |      | X     |       | X     |      |         |
| Mjøsa        | 2016 | Vendace        | <i>Coregonus albula</i>    | X    | X    | X     | X     | X    | X    | X    | X      | X      | X      | X      | X      | X     | X    | X     | X     | X     | X    | X       |
| Mjøsa        | 2017 | Vendace        | <i>Coregonus albula</i>    | X    | X    | X     | X     | X    | X    | X    | X      | X      | X      | X      | X      | X     | X    | X     | X     | X     | X    | X       |
| Mjøsa        | 2018 | Vendace        | <i>Coregonus albula</i>    | X    | X    | X     | X     | X    | X    | X    | X      | X      | X      | X      | X      | X     | X    | X     | X     | X     | X    | X       |
| Mjøsa        | 2019 | Vendace        | <i>Coregonus albula</i>    | X    | X    | X     | X     | X    | X    | X    | X      | X      | X      | X      | X      | X     | X    | X     | X     | X     | X    | X       |
| Randsfjorden | 2015 | Arctic char    | <i>Salvelinus alpinus</i>  | X    | X    | X     | X     | X    | X    | X    | X      | X      | X      | X      |        | X     |      | X     |       | X     |      |         |
| Randsfjorden | 2016 | Arctic char    | <i>Salvelinus alpinus</i>  | X    | X    | X     | X     | X    | X    | X    | X      | X      | X      | X      | X      | X     | X    | X     | X     | X     | X    | X       |
| Randsfjorden | 2014 | Brown trout    | <i>Salmo trutta</i>        | X    | X    | X     | X     | X    | X    | X    | X      | X      | X      | X      |        | X     |      | X     |       | X     |      |         |
| Randsfjorden | 2015 | Brown trout    | <i>Salmo trutta</i>        | X    | X    | X     | X     | X    | X    | X    | X      | X      | X      | X      |        | X     |      | X     |       | X     |      |         |
| Randsfjorden | 2016 | Brown trout    | <i>Salmo trutta</i>        | X    | X    | X     | X     | X    | X    | X    | X      | X      | X      | X      | X      | X     | X    | X     | X     | X     | X    | X       |
| Randsfjorden | 2014 | European smelt | <i>Osmerus eperlanus</i>   | X    | X    | X     | X     | X    | X    | X    | X      | X      | X      | X      |        | X     |      | X     |       | X     |      |         |
| Randsfjorden | 2015 | European smelt | <i>Osmerus eperlanus</i>   | X    | X    | X     | X     | X    | X    | X    | X      | X      | X      | X      |        | X     |      | X     |       | X     |      |         |
| Randsfjorden | 2016 | European smelt | <i>Osmerus eperlanus</i>   | X    | X    | X     | X     | X    | X    | X    | X      | X      | X      | X      | X      | X     | X    | X     | X     | X     | X    | X       |
| Tyrifjorden  | 2014 | Perch          | <i>Perca fluviatilis</i>   | X    | X    | X     | X     | X    | X    | X    | X      | X      | X      | X      |        | X     |      | X     |       | X     |      |         |
| Tyrifjorden  | 2015 | Perch          | <i>Perca fluviatilis</i>   | X    | X    | X     | X     | X    | X    | X    | X      | X      | X      | X      |        | X     |      | X     |       | X     |      |         |
| Tyrifjorden  | 2016 | Perch          | <i>Perca fluviatilis</i>   | X    | X    | X     | X     | X    | X    | X    | X      | X      | X      | X      | X      | X     | X    | X     | X     | X     | X    | X       |
| Tyrifjorden  | 2018 | Arctic char    | <i>Salvelinus alpinus</i>  | X    | X    | X     | X     | X    | X    | X    | X      | X      | X      | X      | X      | X     | X    | X     | X     | X     | X    | X       |
| Tyrifjorden  | 2018 | Bream          | <i>Abramis brama</i>       | X    | X    | X     | X     | X    | X    | X    | X      | X      | X      | X      | X      | X     | X    | X     | X     | X     | X    | X       |
| Tyrifjorden  | 2018 | Perch          | <i>Perca fluviatilis</i>   | X    | X    | X     | X     | X    | X    | X    | X      | X      | X      | X      | X      | X     | X    | X     | X     | X     | X    | X       |
| Tyrifjorden  | 2018 | Pike           | <i>Esox lucius</i>         | X    | X    | X     | X     | X    | X    | X    | X      | X      | X      | X      | X      | X     | X    | X     | X     | X     | X    | X       |
| Tyrifjorden  | 2018 | Roach          | <i>Rutilus rutilus</i>     | X    | X    | X     | X     | X    | X    | X    | X      | X      | X      | X      | X      | X     | X    | X     | X     | X     | X    | X       |



| Site          | Year | Species   | Latin                      | PFBA | PFPA | PFHxA | PFHpA | PFOA | PFNA | PFDA | PFUnDA | PFDoDA | PFTrDA | PFTeDA | PFPeDA | PFHxDA | PFBS | PFPeS | PFHxS | PFHpS | PFOS | Br-PFOS |
|---------------|------|-----------|----------------------------|------|------|-------|-------|------|------|------|--------|--------|--------|--------|--------|--------|------|-------|-------|-------|------|---------|
| Tyrifjorden   | 2018 | Trout     | <i>Salmo trutta</i>        | X    | X    | X     | X     | X    | X    | X    | X      | X      | X      | X      | X      | X      | X    | X     | X     | X     | X    | X       |
| Tyrifjorden   | 2018 | Whitefish | <i>Coregonus lavaretus</i> | X    | X    | X     | X     | X    | X    | X    | X      | X      | X      | X      | X      | X      | X    | X     | X     | X     | X    | X       |
| Rygge airport | 2014 | Perch     | <i>Perca fluviatilis</i>   | X    | X    | X     | X     | X    | X    | X    | X      | X      | X      | X      |        |        | X    |       | X     |       | X    |         |
| Rygge airport | 2015 | Perch     | <i>Perca fluviatilis</i>   | X    | X    | X     | X     | X    | X    | X    | X      | X      | X      | X      |        |        | X    |       | X     |       | X    |         |
| Rygge airport | 2016 | Perch     | <i>Perca fluviatilis</i>   | X    | X    | X     | X     | X    | X    | X    | X      | X      | X      | X      | X      |        | X    | X     | X     | X     | X    |         |

Table S5 (continuation). Targeted PFAS in liver samples at the different sites and species (X marks targeted PFAS).

| Site     | Year | Species        | Latin                      | PFNS | PFDS | PFDoDS | FOSA | MeFOSA | EtFOSA | MeFOSE | EtFOSE | FOSAA | MeFOSAA | EtFOSAA | 4:2 FTS | 6:2 FTS | 8:2 FTS | 10:2 FTS | 12:2 FTS | 14:2 FTS | PF-3,7-DMOA | HPFHpA |
|----------|------|----------------|----------------------------|------|------|--------|------|--------|--------|--------|--------|-------|---------|---------|---------|---------|---------|----------|----------|----------|-------------|--------|
| Femunden | 2014 | Brown trout    | <i>Salmo trutta</i>        |      | X    | X      | X    | X      | X      | X      | X      |       | X       | X       |         |         | X       |          |          |          |             |        |
| Femunden | 2015 | Brown trout    | <i>Salmo trutta</i>        |      | X    | X      | X    | X      | X      | X      | X      |       | X       | X       |         |         | X       |          |          |          |             |        |
| Femunden | 2016 | Brown trout    | <i>Salmo trutta</i>        | X    | X    | X      | X    | X      | X      | X      | X      |       | X       | X       | X       | X       | X       |          |          |          |             |        |
| Femunden | 2017 | Brown trout    | <i>Salmo trutta</i>        | X    | X    | X      | X    | X      | X      | X      | X      |       | X       | X       | X       | X       | X       |          |          |          |             |        |
| Femunden | 2018 | Brown trout    | <i>Salmo trutta</i>        | X    | X    | X      | X    | X      | X      | X      | X      |       | X       | X       | X       | X       | X       |          |          |          | X           |        |
| Femunden | 2019 | Brown trout    | <i>Salmo trutta</i>        | X    | X    | X      | X    | X      | X      | X      | X      |       | X       | X       | X       | X       | X       |          |          |          | X           |        |
| Femunden | 2014 | Whitefish      | <i>Coregonus lavaretus</i> |      | X    | X      | X    | X      | X      | X      | X      |       | X       | X       |         |         | X       |          |          |          |             |        |
| Femunden | 2015 | Whitefish      | <i>Coregonus lavaretus</i> |      | X    | X      | X    | X      | X      | X      | X      |       | X       | X       |         |         | X       |          | X        |          |             |        |
| Femunden | 2016 | Whitefish      | <i>Coregonus lavaretus</i> | X    | X    | X      | X    | X      | X      | X      | X      |       | X       | X       | X       | X       | X       |          |          |          |             |        |
| Mjøsa    | 2014 | Brown trout    | <i>Salmo trutta</i>        |      | X    | X      | X    | X      | X      | X      | X      |       | X       | X       |         |         | X       |          |          |          |             |        |
| Mjøsa    | 2015 | Brown trout    | <i>Salmo trutta</i>        |      | X    | X      | X    | X      | X      | X      | X      |       | X       | X       |         |         | X       |          | X        |          |             |        |
| Mjøsa    | 2016 | Brown trout    | <i>Salmo trutta</i>        | X    | X    | X      | X    | X      | X      | X      | X      |       | X       | X       | X       | X       | X       |          |          |          |             |        |
| Mjøsa    | 2017 | Brown trout    | <i>Salmo trutta</i>        | X    | X    | X      | X    | X      | X      | X      | X      |       | X       | X       | X       | X       | X       |          |          |          |             |        |
| Mjøsa    | 2018 | Brown trout    | <i>Salmo trutta</i>        | X    | X    | X      | X    | X      | X      | X      | X      |       | X       | X       | X       | X       | X       |          |          |          | X           |        |
| Mjøsa    | 2019 | Brown trout    | <i>Salmo trutta</i>        | X    | X    | X      | X    | X      | X      | X      | X      |       | X       | X       | X       | X       | X       |          |          |          | X           |        |
| Mjøsa    | 2014 | European smelt | <i>Osmerus eperlanus</i>   |      | X    | X      | X    | X      | X      | X      | X      |       | X       | X       |         |         | X       |          |          |          |             |        |
| Mjøsa    | 2015 | European smelt | <i>Osmerus eperlanus</i>   |      | X    | X      | X    | X      | X      | X      | X      |       | X       | X       |         |         | X       |          | X        |          |             |        |
| Mjøsa    | 2016 | European smelt | <i>Osmerus eperlanus</i>   | X    | X    | X      | X    | X      | X      | X      | X      |       | X       | X       | X       | X       | X       |          |          |          |             |        |
| Mjøsa    | 2017 | European smelt | <i>Osmerus eperlanus</i>   | X    | X    | X      | X    | X      | X      | X      | X      |       | X       | X       | X       | X       | X       |          |          |          |             |        |
| Mjøsa    | 2018 | European smelt | <i>Osmerus eperlanus</i>   | X    | X    | X      | X    | X      | X      | X      | X      |       | X       | X       | X       | X       | X       |          |          |          | X           |        |
| Mjøsa    | 2019 | European smelt | <i>Osmerus eperlanus</i>   | X    | X    | X      | X    | X      | X      | X      | X      |       | X       | X       | X       | X       | X       |          |          |          | X           |        |
| Mjøsa    | 2014 | Vendace        | <i>Coregonus albula</i>    |      | X    | X      | X    | X      | X      | X      | X      |       | X       | X       |         |         | X       |          |          |          |             |        |
| Mjøsa    | 2016 | Vendace        | <i>Coregonus albula</i>    | X    | X    | X      | X    | X      | X      | X      | X      |       | X       | X       | X       | X       | X       |          |          |          |             |        |
| Mjøsa    | 2017 | Vendace        | <i>Coregonus albula</i>    | X    | X    | X      | X    | X      | X      | X      | X      |       | X       | X       | X       | X       | X       |          |          |          |             |        |
| Mjøsa    | 2018 | Vendace        | <i>Coregonus albula</i>    | X    | X    | X      | X    | X      | X      | X      | X      |       | X       | X       | X       | X       | X       |          |          |          | X           |        |
| Mjøsa    | 2019 | Vendace        | <i>Coregonus albula</i>    | X    | X    | X      | X    | X      | X      | X      | X      |       | X       | X       | X       | X       | X       |          |          |          | X           |        |

| Site         | Year | Species        | Latin                     | PFNS | PFDS | PFDoDS | FOSA | MeFOSA | EtFOSA | MeFOSE | EtFOSE | FOSAA | MeFOSAA | EtFOSAA | 4:2 FTS | 6:2 FTS | 8:2 FTS | 10:2 FTS | 12:2 FTS | 14:2 FTS | PF-3,7-DMOA | HPFHpA |
|--------------|------|----------------|---------------------------|------|------|--------|------|--------|--------|--------|--------|-------|---------|---------|---------|---------|---------|----------|----------|----------|-------------|--------|
| Randsfjorden | 2015 | Arctic char    | <i>Salvelinus alpinus</i> |      | X    | X      | X    | X      | X      | X      | X      |       | X       | X       |         | X       | X       |          |          |          |             |        |
| Randsfjorden | 2016 | Arctic char    | <i>Salvelinus alpinus</i> | X    | X    | X      | X    | X      | X      | X      | X      |       | X       | X       | X       | X       | X       |          |          |          |             |        |
| Randsfjorden | 2014 | Brown trout    | <i>Salmo trutta</i>       |      | X    | X      | X    | X      | X      | X      | X      |       | X       | X       |         | X       |         |          |          |          |             |        |
| Randsfjorden | 2015 | Brown trout    | <i>Salmo trutta</i>       |      | X    | X      | X    | X      | X      | X      | X      |       | X       | X       |         | X       |         |          |          |          |             |        |
| Randsfjorden | 2016 | Brown trout    | <i>Salmo trutta</i>       | X    | X    | X      | X    | X      | X      | X      | X      |       | X       | X       | X       | X       | X       |          |          |          |             |        |
| Randsfjorden | 2014 | European smelt | <i>Osmerus eperlanus</i>  |      | X    | X      | X    | X      | X      | X      | X      |       | X       | X       |         | X       |         |          |          |          |             |        |
| Randsfjorden | 2015 | European smelt | <i>Osmerus eperlanus</i>  |      | X    | X      | X    | X      | X      | X      | X      |       | X       | X       |         | X       |         |          |          |          |             |        |
| Randsfjorden | 2016 | European smelt | <i>Osmerus eperlanus</i>  | X    | X    | X      | X    | X      | X      | X      | X      |       | X       | X       | X       | X       | X       |          |          |          |             |        |
| Tyrifjorden  | 2014 | Perch          | <i>Perca fluviatilis</i>  |      | X    | X      | X    | X      | X      | X      | X      |       | X       | X       |         | X       |         |          |          |          |             |        |
| Tyrifjorden  | 2015 | Perch          | <i>Perca fluviatilis</i>  |      | X    | X      | X    | X      | X      | X      | X      |       | X       | X       |         | X       |         |          |          |          |             |        |
| Tyrifjorden  | 2016 | Perch          | <i>Perca fluviatilis</i>  | X    | X    | X      | X    | X      | X      | X      | X      |       | X       | X       | X       | X       | X       |          |          |          |             |        |
| Tyrifjorden  | 2018 | Arctic char    | <i>Salvelinus alpinus</i> | X    | X    | X      | X    | X      | X      | X      | X      | X     | X       | X       | X       | X       | X       | X        | X        | X        | X           | X      |
| Tyrifjorden  | 2018 | Bream          | <i>Abramis brama</i>      | X    | X    | X      | X    | X      | X      | X      | X      | X     | X       | X       | X       | X       | X       | X        | X        | X        | X           | X      |
| Tyrifjorden  | 2018 | Perch          | <i>Perca fluviatilis</i>  | X    | X    | X      | X    | X      | X      | X      | X      | X     | X       | X       | X       | X       | X       | X        | X        | X        | X           | X      |

| Site          | Year | Species   | Latin                      | PFNS | PFDS | PFDoDS | FOSA | MeFOSA | EtFOSA | MeFOSE | EtFOSE | FOSAA | MeFOSAA | EtFOSAA | 4:2 FTS | 6:2 FTS | 8:2 FTS | 10:2 FTS | 12:2 FTS | 14:2 FTS | PF-3,7-DMOA | HPFHpA |  |
|---------------|------|-----------|----------------------------|------|------|--------|------|--------|--------|--------|--------|-------|---------|---------|---------|---------|---------|----------|----------|----------|-------------|--------|--|
| Tyrifjorden   | 2018 | Pike      | <i>Esox lucius</i>         | X    | X    | X      | X    | X      | X      | X      | X      | X     | X       | X       | X       | X       | X       | X        | X        | X        | X           |        |  |
| Tyrifjorden   | 2018 | Roach     | <i>Rutilus rutilus</i>     | X    | X    | X      | X    | X      | X      | X      | X      | X     | X       | X       | X       | X       | X       | X        | X        | X        | X           |        |  |
| Tyrifjorden   | 2018 | Trout     | <i>Salmo trutta</i>        | X    | X    | X      | X    | X      | X      | X      | X      | X     | X       | X       | X       | X       | X       | X        | X        | X        | X           |        |  |
| Tyrifjorden   | 2018 | Whitefish | <i>Coregonus lavaretus</i> | X    | X    | X      | X    | X      | X      | X      | X      | X     | X       | X       | X       | X       | X       | X        | X        | X        | X           |        |  |
| Rygge airport | 2014 | Perch     | <i>Perca fluviatilis</i>   |      | X    | X      | X    | X      | X      | X      | X      |       | X       | X       |         | X       |         |          |          |          |             |        |  |
| Rygge airport | 2015 | Perch     | <i>Perca fluviatilis</i>   |      | X    | X      | X    | X      | X      | X      | X      |       | X       | X       |         | X       | X       |          |          |          |             |        |  |
| Rygge airport | 2016 | Perch     | <i>Perca fluviatilis</i>   | X    | X    | X      | X    | X      | X      | X      | X      |       | X       | X       | X       | X       | X       |          |          |          |             |        |  |

Table S6. Mean concentrations of  $\Sigma$ PFAS 17 in liver samples of various fish species at the different sites. Significant differences (Kruskal-Wallis and Bonferroni correction) are indicated by different significance letters. Limit of significance was set to 0.05. Mean concentrations are shown with the standard error of the mean (SEM).

| Site, Species                     | Significance letter | Mean concentration ( $\mu\text{g kg}^{-1}$ ) |
|-----------------------------------|---------------------|----------------------------------------------|
| Rygge airport, Perch              | a                   | 298.9 $\pm$ 37.6                             |
| Lake Tyrifjorden, Arctic char     | ab                  | 232.5 <sup>a</sup>                           |
| Lake Tyrifjorden, Perch           | ab                  | 287.5 $\pm$ 37.3                             |
| Lake Tyrifjorden, Brown trout     | ab                  | 241.6 $\pm$ 58.9                             |
| Lake Tyrifjorden, Bream           | ab                  | 167.5 $\pm$ 9.5                              |
| Lake Tyrifjorden, Whitefish       | ab                  | 181.4 $\pm$ 52.7                             |
| Lake Tyrifjorden, Pike            | ab                  | 121.8 $\pm$ 17.1                             |
| Lake Tyrifjorden, Roach           | ab                  | 90.5 $\pm$ 21.9                              |
| Lake Randsfjorden, Brown trout    | b                   | 71.4 $\pm$ 10.7                              |
| Lake Femunden, Brown trout        | b                   | 58.9 $\pm$ 7.2                               |
| Lake Mjøsa, Brown trout           | b                   | 41.8 $\pm$ 3.2                               |
| Lake Mjøsa, European smelt        | b                   | 36.9 $\pm$ 3.2                               |
| Lake Randsfjorden, Arctic char    | bc                  | 27.7 $\pm$ 4.5                               |
| Lake Randsfjorden, European smelt | bc                  | 21.6 $\pm$ 2.0                               |
| Lake Femunden, Whitefish          | bc                  | 20.6 $\pm$ 1.6                               |
| Lake Mjøsa, Vendace               | c                   | 9.7 $\pm$ 1.1                                |

<sup>a</sup> Only one sample

Table S7. Mean concentrations of  $\Sigma$ PFAS 7 in muscle samples of various fish species at the different sites. Significant differences (Kruskal-Wallis and Bonferroni correction) are indicated by different significance letters. The level of significance was set to 0.05. Mean concentrations are shown with the standard error of the mean (SEM).

| Site, Species                          | Significance letter | Mean concentration ( $\mu\text{g kg}^{-1}$ ) |
|----------------------------------------|---------------------|----------------------------------------------|
| Oslo Airport, Pike                     | a                   | 22.9 $\pm$ 1.25                              |
| Fagernes, Perch                        | a                   | 64.4 $\pm$ 13.3                              |
| Rygge airport, Perch                   | a                   | 20.0 $\pm$ 2.6                               |
| Evenes, Arctic char                    | a                   | 19.1 $\pm$ 2.6                               |
| Rygge airport, Pike                    | a                   | 22.1 $\pm$ 6.1                               |
| Lake Tyrifjorden, Perch                | a                   | 15.0 $\pm$ 1.6                               |
| Evenes, Brown Trout                    | a                   | 18.8 $\pm$ 2.6                               |
| Rygge airport, Zander                  | a                   | 13.0 $\pm$ 2.5                               |
| Oslo airport, Brown trout              | a                   | 271.5 $\pm$ 118.4                            |
| Oslo airport, <i>Squalius cephalus</i> | ab                  | 7.9 <sup>a</sup>                             |
| Fagernes, Brown Trout                  | ab                  | 11.3 $\pm$ 1.5                               |
| Lake Tyrifjorden, Arctic char          | ab                  | 5.9 <sup>a</sup>                             |
| Fagernes, Whitefish                    | ab                  | 14.0 $\pm$ 4.3                               |
| Lake Tyrifjorden, Pike                 | ab                  | 5.4 $\pm$ 0.9                                |
| Lake Tyrifjorden, Brown Trout          | ab                  | 5.0 $\pm$ 1.2                                |
| Lake Mjøsa, European Smelt             | b                   | 4.1 $\pm$ 0.3                                |
| Lake Mjøsa, Brown Trout                | b                   | 3.2 $\pm$ 0.2                                |
| Lake Randsfjorden, Arctic Char         | b                   | 1.6 <sup>a</sup>                             |
| Lake Randsfjorden, Brown Trout         | b                   | 1.4 $\pm$ 0.1                                |
| Lake Femunden, Whitefish               | b                   | 1.2 $\pm$ 0.004                              |
| Lake Randsfjorden, European Smelt      | b                   | 1.2 $\pm$ 0.04                               |

<sup>a</sup> Only one sample

Table S8. Mean values in ratios between PFUnDA and PFDA in brown trout livers. Significant differences (Kruskal-Wallis and Bonferroni correction) are indicated by different significance letters. The level of significance was set to 0.05. Mean values are shown with the standard error of the mean (SEM).

| <b>Site, Species</b> | <b>Mean value</b> | <b>Significance letter</b> |
|----------------------|-------------------|----------------------------|
| Lake Randsfjorden    | 5.0±0.3           | a                          |
| Lake Femunden        | 4.9±0.3           | a                          |
| Lake Mjøsa           | 2.8±0.1           | b                          |
| Lake Tyrifjorden     | 1.8±0.3           | b                          |

Table S9. Mean values in ratios between PFTrDA and PFDoDA in brown trout livers. Significant differences (Kruskal-Wallis and Bonferroni correction) are indicated by different significance letters. The level of significance was set to 0.05. Mean values are shown with the standard error of the mean (SEM).

| <b>Site, Species</b> | <b>Mean value</b> | <b>Significance letter</b> |
|----------------------|-------------------|----------------------------|
| Lake Randsfjorden    | 4.3±0.4           | a                          |
| Lake Femunden        | 4.7±0.3           | a                          |
| Lake Mjøsa           | 1.7±0.1           | b                          |
| Lake Tyrifjorden     | 0.7±0.3           | b                          |

Supplementary figures

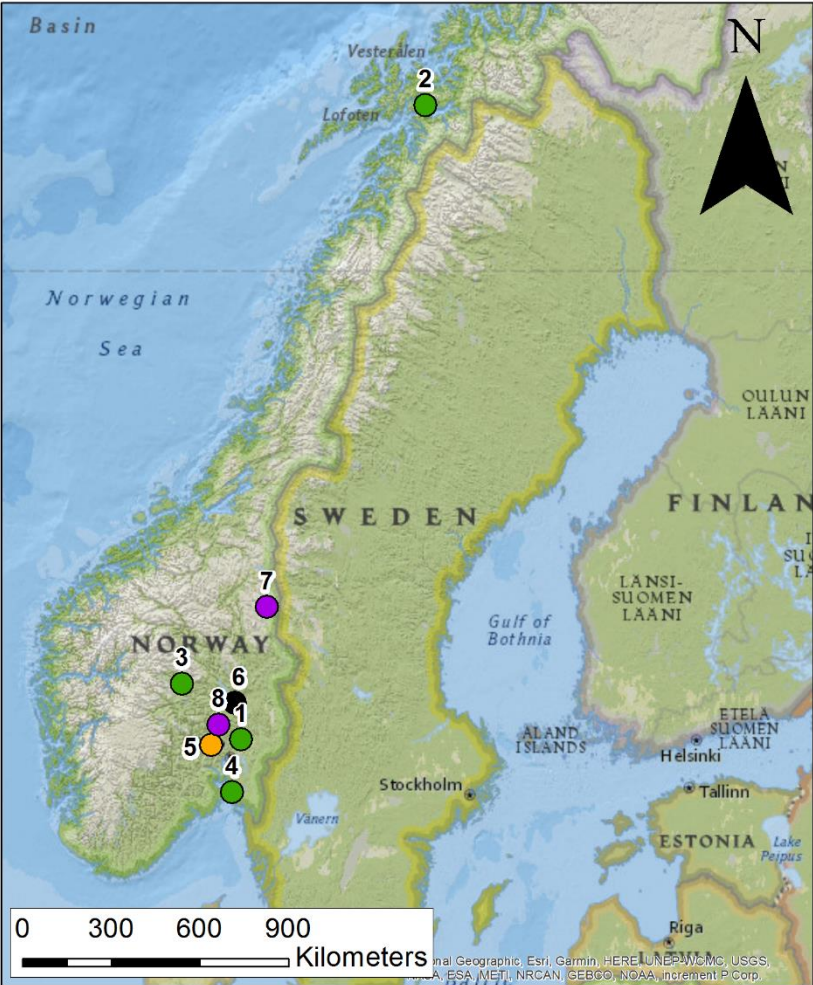

Figure S1. Overview map showing the investigated point sources, AFFF sources (green dots); production of paper products (orange dot); urban runoff, and mixed sources (black dot); and long range transport (purple dots): 1) Oslo Airport; 2) Evenes Airport; 3) Fagernes Airport; 4) Rygge Airport; 5) Lake Tyrifjorden; 6) Lake Mjøsa; 7) Lake Femunden; and 8) Lake Randsfjorden.



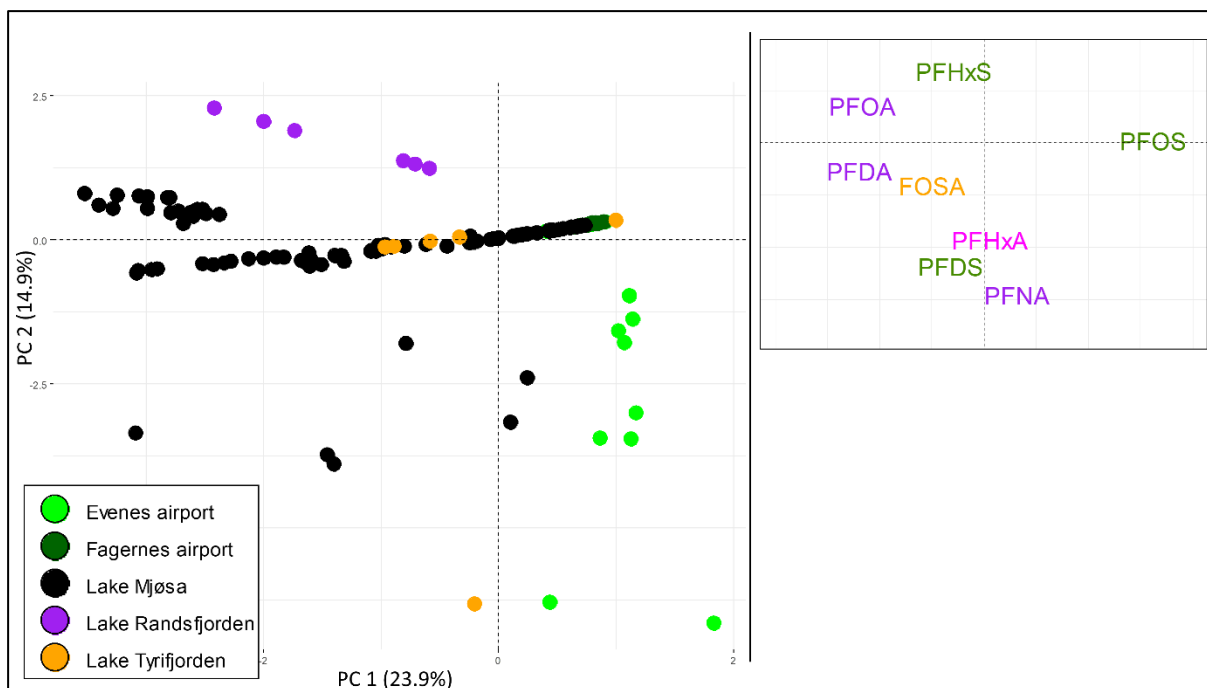

Figure S2. Principal Component Analysis (PCA) for PFAS profiles in Brown trout muscle from two sites affected by AFFF (Evenes airport and Fagernes airport), lake Mjøsa, polluted by diffuse sources including industry, WWTP, and urban runoff, lake Randsfjorden that was considered to receive the majority of PFAS pollution from long range transport, and lake Tyrifjorden polluted by PFAS from production of paper products. The score plot is shown to the left and the loading plot is shown to the right. In the loading plot, PFCA are coloured purple and pink, PFSA are coloured green, and preFOS are coloured yellow. Only PFAS targeted at all sites and detected above the LOQ in at least one sample were included. Concentrations below the LOQ were treated as 0.

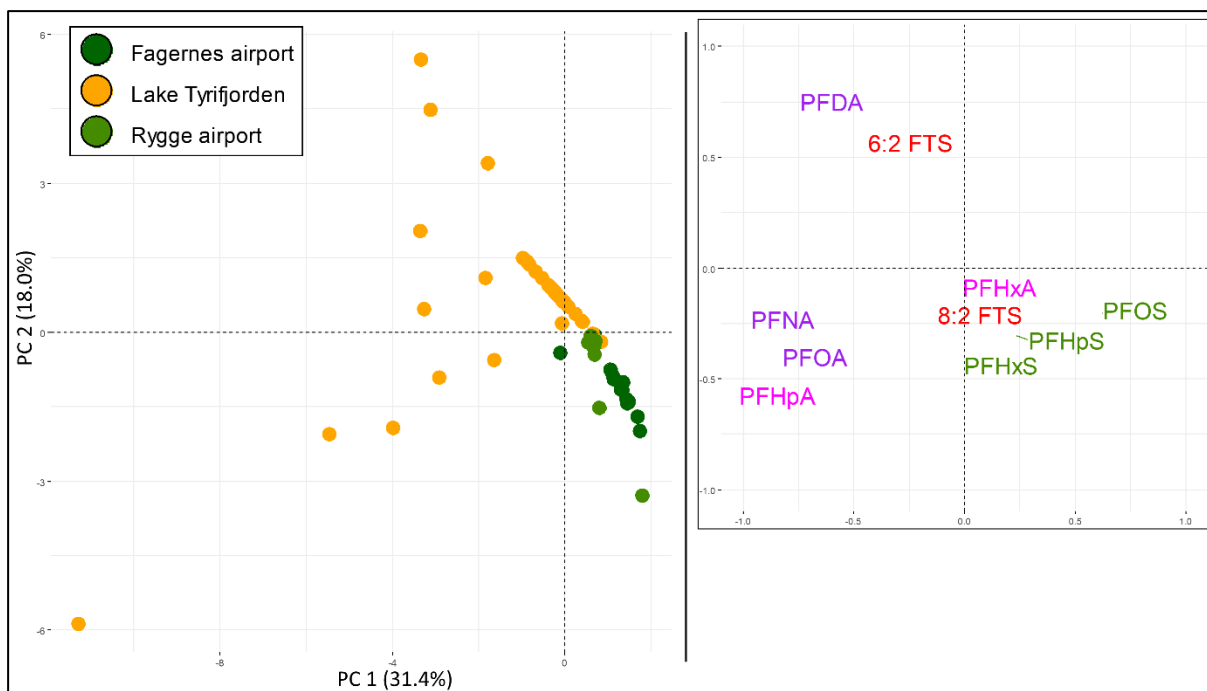

Figure S3. Principal Component Analysis (PCA) for PFAS profiles in perch muscle from two sites affected by AFFF (Fagernes airport and Rygge airport), and lake Tyrifjorden polluted by PFAS from production of paper products. The score plot is shown to the left and the loading plot is shown to the right. In the loading plot, PFCA are coloured purple and pink, PFSA are coloured green, and preFOS are coloured yellow. Only PFAS targeted at all sites and detected above the LOQ in at least one sample were included. Concentrations below the LOQ were treated as 0.

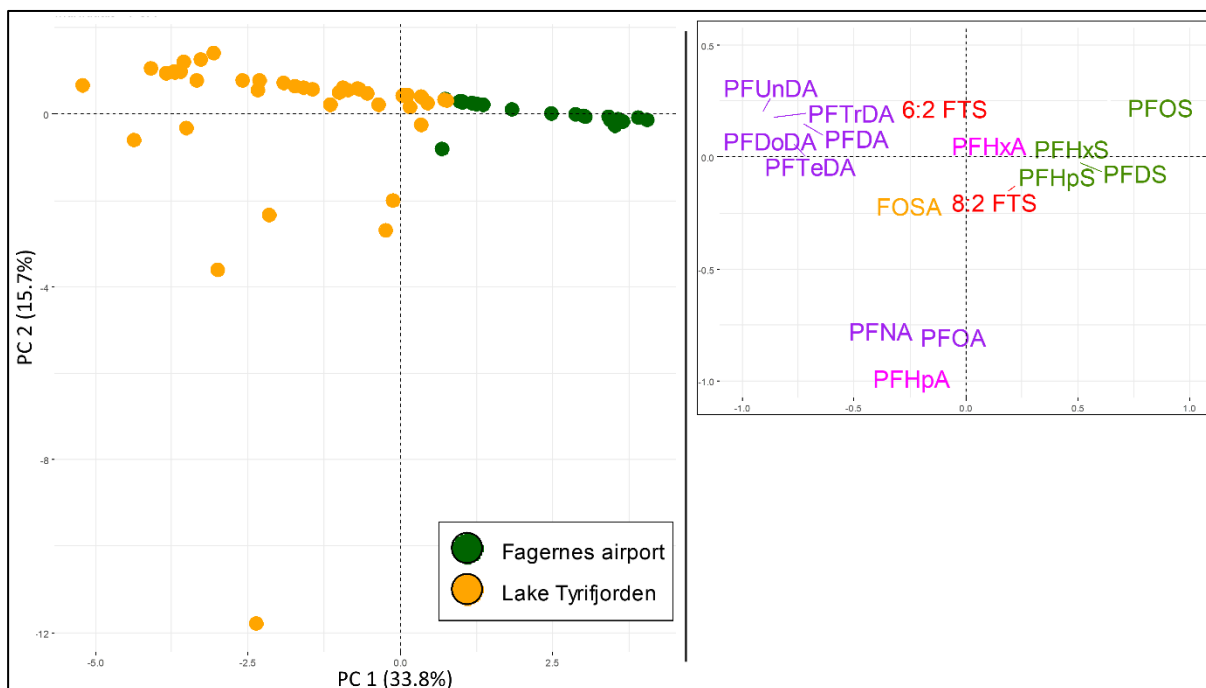

Figure S4. Principal Component Analysis (PCA) for PFAS profiles in perch muscle from Fagernes airport, polluted by AFFF, and lake Tyrifjorden polluted by PFAS from production of paper products. The score plot is shown to the left and the loading plot is shown to the right. In the loading plot, PFCA are coloured purple and pink, PFSA are coloured green, and preFOS are coloured yellow. Only PFAS targeted at all sites and detected above the LOQ in at least one sample were included. Concentrations below the LOQ were treated as 0.

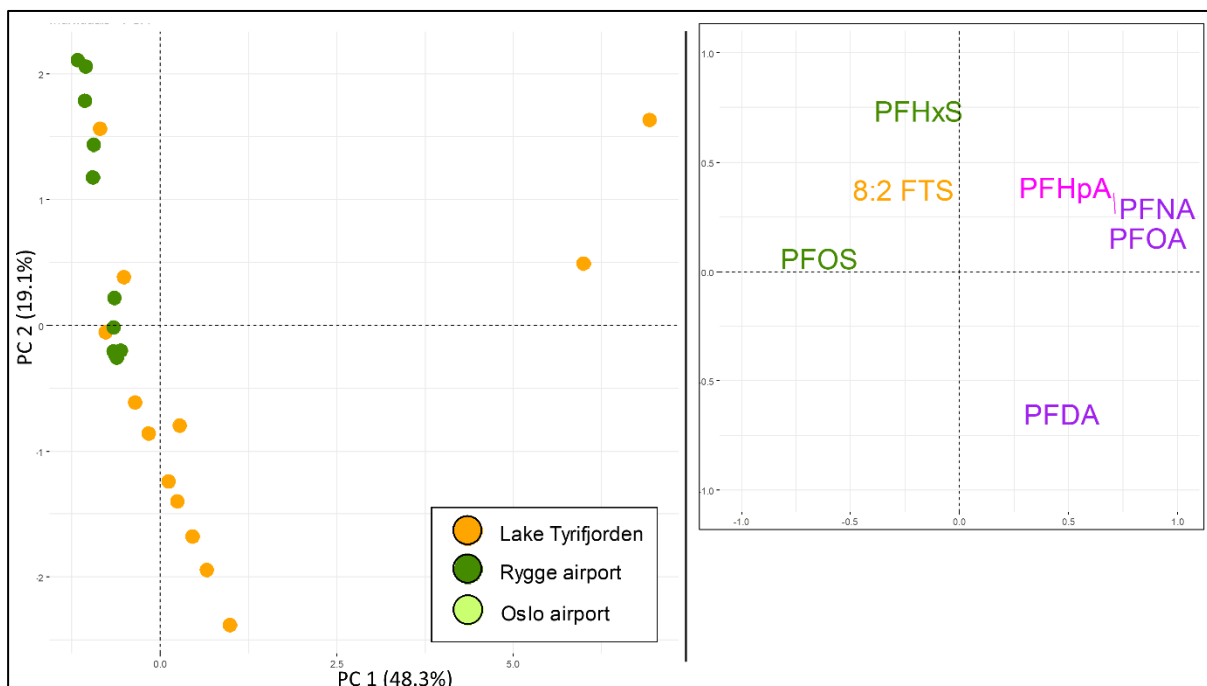

Figure S5. Principal Component Analysis (PCA) for PFAS profiles in pike muscle from two sites affected by AFFF (lake Vansjø (Rygge airport) and Oslo airport), and lake Tyrifjorden polluted by PFAS from production of paper products. The score plot is shown to the left and the loading plot is shown to the right. In the loading plot, PFCA are coloured purple and pink, PFSA are coloured green, and preFOS are coloured yellow. Only PFAS targeted at all sites and detected above the LOQ in at least one sample were included. Concentrations below the LOQ were treated as 0.

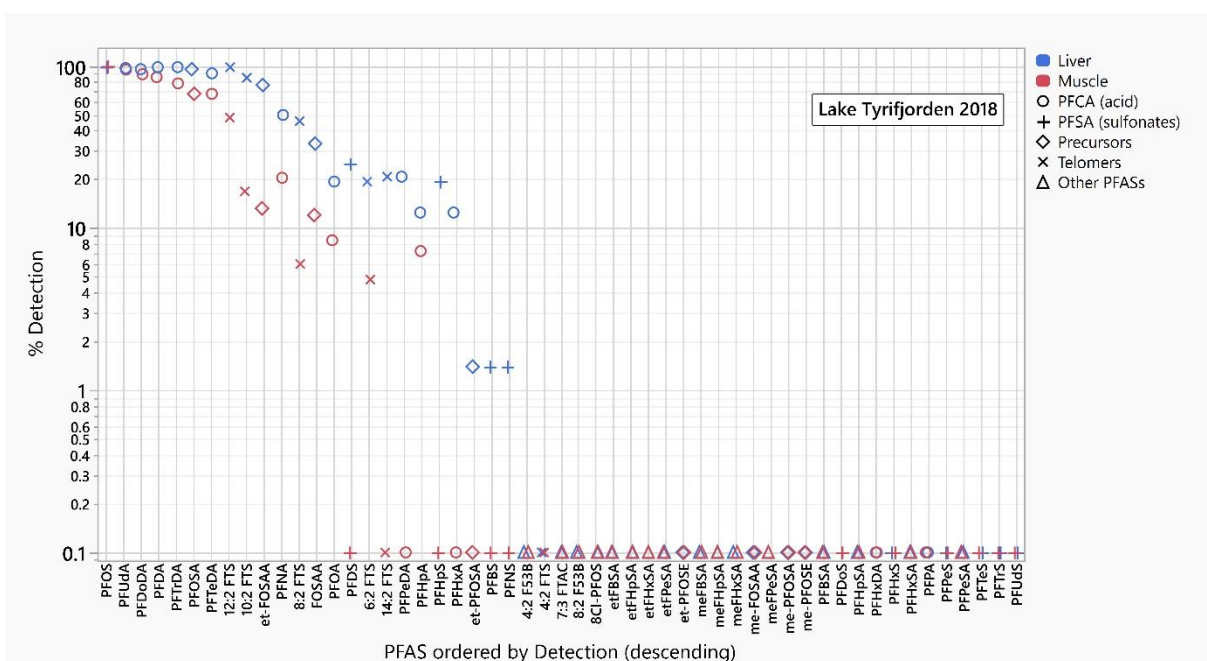

Figure S6. Overview of PFAS detections in liver (blue) and muscle (red) for target PFAS in samples of perch and trout from Lake Tyrifjorden (data from Langberg et al. (2020)).

## References

- Blytt, L. D. and Stang, P. (2019) *Report 242/2018, Organiske miljøgifter i norsk avløps slam – Resultater fra undersøkelsen i 2017/18, In Norwegian.* Available at: <https://norskvann.no/index.php/component/hikashop/produkt/845-a242-organiske-miljogifter-i-norsk-avlopslam---resultater-fra-undersokelsen-i-2017-18?Itemid=780>.
- Fjeld, E.; Bæk, K.; Rundberget, J. T.; Schlabach, M. and Warner, N. A. (2017) *Miljøgifter i store norske innsjøer, 2016. In Norwegian. Report M-807. The Norwegian Institute for Water Research (NIVA) and the Norwegian Institute for Air Research (NILU).*
- Jonsson, N.; Næsje, T. F.; Jonsson, B.; Saksgård, R. and Sandlund, O. T. (1999) 'The influence of piscivory on life history traits of brown trout', *Journal of Fish Biology*, 55(6), pp. 1129–1141. doi: 10.1006/jfbi.1999.1115.
- Kassambara, A. and Mundt, F. (2017) 'factoextra: Extract and Visualize the Results of Multivariate Data Analyses'. Available at: <https://cran.r-project.org/package=factoextra>.
- Langberg, H. A.; Breedveld, G. D.; Slinde, G. A.; Grønning, H. M.; Høisæter, Å.; Jartun, M.; Rundberget, T.; Jensen, B. M. and Hale, S. E. (2020) 'Fluorinated precursor compounds in sediments as a Source of perfluorinated alkyl acids (PFAs) to Biota', *Environmental Science & Technology*, 54(20), pp. 13077–13089. doi: 10.1021/acs.est.0c04587.
- Lê, S.; Josse, J. and Husson, F. (2008) '{FactoMineR}: A Package for Multivariate Analysis', *Journal of Statistical Software*, 25(1), pp. 1–18. doi: 10.18637/jss.v025.i01.
- de Mendiburu, F. (2019) 'agricolae: Statistical Procedures for Agricultural Research'. Available at: <https://cran.r-project.org/package=agricolae>.
- Næsje, T. F.; Forseth, T.; Saksgård, R.; Hårsaker, K. and Sandlund, O. T. (1996) *Production and management of piscivorous brown trout in Lake Femund. Annual report 1995. NINA Oppdragsmelding 436. The Norwegian Institute for Nature Research (NINA).*
- R Core Team (2017) 'R: A language and environment for statistical computing'. Vienna, Austria. Available at: <https://www.r-project.org/>.
- Sandlund, O. T.; Grøndahl, F. A.; Kjellberg, G. and Næsje, T. F. (2017) 'Variabel livshistorie hos krøkle (*Osmerus eperlanus*) i Mjøsa og Randsfjorden. In Norwegian with an English abstract', *Vann (Norwegian Journal)*, 01, pp. 81–92.
- Spikkeland, I.; Kinsten, B.; Kjellberg, G.; Nilssen, J. P. and Väinölä, R. (2016) 'The aquatic glacial relict fauna of Norway – an update of distribution and conservation status', *Fauna Norvegica*, 36(51), pp. 51–65. doi: 10.5324/fn.v36i0.1994.
