# Supplementary material for: A review of PFAS fingerprints in fish from Norwegian freshwater bodies subject to different source inputs
Source: Royal Society of Chemistry journal article supplement (doi:10.1039/d1em00408e), 2022-01-01
Supplement: d1em00408e2.xlsx [file d1em00408e2.xlsx]

## Sheet: Raw data
											ng/g
Sample name	Year	PFAS source	Lake/stream	Comment	Koordinates	Species	Scientific name	Tissue	Length, cm	Weight, g	PFBA	PFPA	PFHxA	PFHpA	PFOA	PFNA	PFDA	PFUnDA	PFDoDA	PFTrDA	PFTeDA	PFPeDA	PFHxDA	PFBS	PFPeS	PFHxS	PFHpS	L-PFOS	Br-PFOS	PFNS	PFDS	PFDoS	FOSA	Me-PFOSA	Et-PFOSA	Me-PFOSE	Et-PFOSE	FOSAA	Me-FOSAA	Et-FOSAA	4:2 FTS	6:2 FTS	8:2 FTS	10:2 FTS	12:2 FTS	14:2 FTS	PF-3,7-DMOA	HPFHpA
ENEV-LAV-B01	2019	AFFF	Evenes-Lavangsvatnet		7598616,27N/568246,3Ø	Brown Trout	Salmo trutta	Muscle	38	600	0.543	<0,500	<0,500	<0,500	<0,500	<0,500	<0,500	<0,500	<0,500	<0,500	<0,500			<0,750		<0,750	<0,750	2.47			<0,750		<0,500								<1,00	<0,750	<1,00				<1,00	<1,00
ENEV-LAV-B02	2019	AFFF	Evenes-Lavangsvatnet		7598616,27N/568246,3Ø	Brown Trout	Salmo trutta	Muscle	40	700	<0,500	<0,500	<0,500	<0,500	<0,500	<0,500	<0,500	<0,500	<0,500	<0,500	<0,500			<0,750		<0,750	<0,750	2.23			<0,750		<0,500								<1,00	<0,750	<1,00				<1,00	<1,00
ENEV-LAV-B03	2019	AFFF	Evenes-Lavangsvatnet		7598616,27N/568246,3Ø	Brown Trout	Salmo trutta	Muscle	32	500	<0,500	<0,500	<0,500	<0,500	<0,500	<0,500	<0,500	1.48	<0,500	<0,500	<0,500			<0,750		<0,750	<0,750	17.6			<0,750		<0,500								<1,00	<0,750	<1,00				<1,00	<1,00
ENEV-LAV-B04	2019	AFFF	Evenes-Lavangsvatnet		7598616,27N/568246,3Ø	Brown Trout	Salmo trutta	Muscle	38	700	<0,500	<0,500	<0,500	<0,500	<0,500	<0,500	<0,500	<0,500	<0,500	<0,500	<0,500			<0,750		<0,750	<0,750	0.737			<0,750		<0,500								<1,00	<0,750	<1,00				<1,00	<1,00
ENEV-LAV-B05	2019	AFFF	Evenes-Lavangsvatnet		7598616,27N/568246,3Ø	Brown Trout	Salmo trutta	Muscle	33	361	<0,500	<0,500	<0,500	<0,500	<0,500	<0,500	<0,500	0.679	<0,500	<0,500	<0,500			<0,750		<0,750	<0,750	11.4			<0,750		<0,500								<1,00	<0,750	<1,00				<1,00	<1,00
ENEV-LAV-B06	2019	AFFF	Evenes-Lavangsvatnet		7598616,27N/568246,3Ø	Brown Trout	Salmo trutta	Muscle	38	631	<0,500	<0,500	<0,500	<0,500	<0,500	<0,500	<0,500	0.633	<0,500	<0,500	<0,500			<0,750		<0,750	<0,750	11.4			<0,750		<0,500								<1,00	<0,750	<1,00				<1,00	<1,00
ENEV-LAV-B07	2019	AFFF	Evenes-Lavangsvatnet		7598616,27N/568246,3Ø	Brown Trout	Salmo trutta	Muscle	30	261	<0,500	<0,500	<0,500	<0,500	<0,500	1.03	<0,500	3.79	<0,500	<0,500	<0,500			<0,750		<0,750	<0,750	41.6			<0,750		1.13								<1,00	<0,750	<1,00				<1,00	<1,00
ENEV-LAV-B08	2019	AFFF	Evenes-Lavangsvatnet		7598616,27N/568246,3Ø	Brown Trout	Salmo trutta	Muscle	30	275	<0,500	<0,500	<0,500	<0,500	<0,500	<0,500	<0,500	0.54	<0,500	<0,500	<0,500			<0,750		<0,750	<0,750	8.36			<0,750		<0,500								<1,00	<0,750	<1,00				<1,00	<1,00
ENEV-LAV-B09	2019	AFFF	Evenes-Lavangsvatnet		7598616,27N/568246,3Ø	Brown Trout	Salmo trutta	Muscle	28.24	205.191	<0,500	<0,500	<0,500	<0,500	<0,500	0.594	<0,500	3.96	<0,500	<0,500	<0,500			<0,750		<0,750	<0,750	39.5			<0,750		<0,500								<1,00	<0,750	<1,00				<1,00	<1,00
ENEV-LAV-B10	2019	AFFF	Evenes-Lavangsvatnet		7598616,27N/568246,3Ø	Brown Trout	Salmo trutta	Muscle	28.28	195.2	<0,500	<0,500	<0,500	<0,500	<0,500	<0,500	<0,500	1.39	<0,500	<0,500	<0,500			<0,750		<0,750	<0,750	17.6			<0,750		<0,500								<1,00	<0,750	<1,00				<1,00	<1,00
ENEV-LAV-B11	2019	AFFF	Evenes-Lavangsvatnet		7598616,27N/568246,3Ø	Brown Trout	Salmo trutta	Muscle	24.2	109.1	<0,500	<0,500	<0,500	<0,500	<0,500	0.675	<0,500	1.79	<0,500	<0,500	<0,500			<0,750		<0,750	<0,750	34.3			<0,750		<0,500								<1,00	<0,750	<1,00				<1,00	<1,00
ENEV-LAV-B12	2019	AFFF	Evenes-Lavangsvatnet		7598616,27N/568246,3Ø	Brown Trout	Salmo trutta	Muscle	29.18	132.11	<0,500	<0,500	<0,500	<0,500	<0,500	0.558	<0,500	2.5	<0,500	0.522	<0,500			<0,750		<0,750	<0,750	25			<0,750		0.879								<1,00	<0,750	<1,00				<1,00	<1,00
ENEV-LAV-B01	2019	AFFF	Evenes-Lavangsvatnet		7598616,27N/568246,3Ø	Arctic char	Salvelinus alpinus	Muscle	34	473	<0,500	<0,500	1.73	<0,200	<0,400	<0,500	<0,500	<0,500	<0,500	<0,500	<0,500			<0,100		0.276	<0,300	7.51			<0,500		<0,500								<0,300	<0,300	<0,300				<1,00	<1,00
ENEV-LAV-B02	2019	AFFF	Evenes-Lavangsvatnet		7598616,27N/568246,3Ø	Arctic char	Salvelinus alpinus	Muscle	34	391	<0,500	<0,500	0.759	<0,300	<0,500	<0,300	<0,300	0.813	<0,300	<0,300	<0,300			<0,300		<0,300	<0,300	12.7			<0,300		<0,500								<0,300	<0,300	<0,300				<1,00	<1,00
ENEV-LAV-B03	2019	AFFF	Evenes-Lavangsvatnet		7598616,27N/568246,3Ø	Arctic char	Salvelinus alpinus	Muscle	38	428	<0,500	<0,500	1.02	<0,300	<0,500	0.385	<0,300	0.823	<0,300	<0,300	<0,300			<0,300		0.411	<0,300	34			<0,300		<0,500								<0,300	<0,300	<0,300				<1,00	<1,00
ENEV-LAV-B04	2019	AFFF	Evenes-Lavangsvatnet		7598616,27N/568246,3Ø	Arctic char	Salvelinus alpinus	Muscle	30	278	<0,500	<0,500	1.96	<0,300	<0,500	0.317	<0,300	<0,300	<0,300	<0,300	<0,300			<0,300		<0,300	<0,300	23.8			<0,300		<0,500								<0,300	<0,300	<0,300				<1,00	<1,00
ENEV-LAV-B05	2019	AFFF	Evenes-Lavangsvatnet		7598616,27N/568246,3Ø	Arctic char	Salvelinus alpinus	Muscle	30	279	<0,500	<0,500	1.52	<0,300	<0,500	0.574	<0,300	1.21	<0,300	<0,300	<0,300			<0,300		0.345	<0,300	25.1			<0,300		<0,500								<0,300	<0,300	<0,300				<1,00	<1,00
ENEV-LAV-B06	2019	AFFF	Evenes-Lavangsvatnet		7598616,27N/568246,3Ø	Arctic char	Salvelinus alpinus	Muscle	33	289	<0,500	<0,500	1.34	<0,300	<0,500	0.332	<0,300	<0,300	<0,300	<0,300	<0,300			<0,300		<0,300	<0,300	29.5			<0,300		<0,500								<0,300	<0,300	<0,300				<1,00	<1,00
ENEV-LAV-B07	2019	AFFF	Evenes-Lavangsvatnet		7598616,27N/568246,3Ø	Arctic char	Salvelinus alpinus	Muscle	30	280	<0,500	<0,500	1.93	<0,300	<0,500	0.584	<0,300	0.307	<0,300	<0,300	<0,300			<0,300		<0,300	<0,300	31.9			<0,300		<0,500								<0,300	<0,300	<0,300				<1,00	<1,00
ENEV-LAN-B01	2019	AFFF	Evenes-Langvatnet		7599071,13N/569224,77Ø	Brown Trout	Salmo trutta	Muscle	40	633	<0,500	<0,500	<0,500	<0,500	<0,500	<0,500	<0,500	4.98	<0,500	<0,500	<0,500			<0,750		<0,750	<0,750	34.3			<0,750		0.817								<1,00	<0,750	<1,00				<1,00	<1,00
ENEV-LAN-B02	2019	AFFF	Evenes-Langvatnet		7599071,13N/569224,77Ø	Brown Trout	Salmo trutta	Muscle	36	481	<0,500	<0,500	<0,500	<0,500	<0,500	0.574	<0,500	1.75	<0,500	<0,500	<0,500			<0,750		<0,750	<0,750	12.4			<0,750		0.621								<1,00	<0,750	<1,00				<1,00	<1,00
ENEV-LAN-B03	2019	AFFF	Evenes-Langvatnet		7599071,13N/569224,77Ø	Brown Trout	Salmo trutta	Muscle	36	452	<0,500	<0,500	<0,500	<0,500	<0,500	<0,500	<0,500	2.16	<0,500	<0,500	<0,500			<0,750		<0,750	<0,750	18.5			<0,750		<0,500								<1,00	<0,750	<1,00				<1,00	<1,00
ENEV-LAN-B04	2019	AFFF	Evenes-Langvatnet		7599071,13N/569224,77Ø	Brown Trout	Salmo trutta	Muscle	38	568	<0,500	<0,500	<0,500	<0,500	<0,500	1.34	0.725	8.41	<0,500	0.966	<0,500			<0,750		<0,750	<0,750	53.3			0.84		<0,500								<1,00	<0,750	<1,00				<1,00	<1,00
ENEV-LAN-B05	2019	AFFF	Evenes-Langvatnet		7599071,13N/569224,77Ø	Brown Trout	Salmo trutta	Muscle	37	520	<0,500	<0,500	<0,500	<0,500	<0,500	<0,500	<0,500	1.72	<0,500	<0,500	<0,500			<0,750		<0,750	<0,750	17.5			<0,750		0.92								<1,00	<0,750	<1,00				<1,00	<1,00
ENEV-LAN-B06	2019	AFFF	Evenes-Langvatnet		7599071,13N/569224,77Ø	Brown Trout	Salmo trutta	Muscle	37	457	<0,500	<0,500	<0,500	<0,500	<0,500	<0,500	<0,500	2.17	<0,500	<0,500	<0,500			<0,750		<0,750	<0,750	14.5			<0,750		<0,500								<1,00	<0,750	<1,00				<1,00	<1,00
ENEV-LAN-B07	2019	AFFF	Evenes-Langvatnet		7599071,13N/569224,77Ø	Brown Trout	Salmo trutta	Muscle	32	415	<0,500	<0,500	<0,500	<0,500	<0,500	1.44	<0,500	21.6	<0,500	6.34	<0,500			<0,750		0.848	<0,750	44.6			1.85		1.42								<1,00	<0,750	<1,00				<1,00	<1,00
ENEV-LAN-B08	2019	AFFF	Evenes-Langvatnet		7599071,13N/569224,77Ø	Brown Trout	Salmo trutta	Muscle	40	509	<0,500	<0,500	<0,500	<0,500	<0,500	<0,500	<0,500	2.29	<0,500	<0,500	<0,500			<0,750		<0,750	<0,750	9.17			<0,750		0.549								<1,00	<0,750	<1,00				<1,00	<1,00
ENEV-LAN-B09	2019	AFFF	Evenes-Langvatnet		7599071,13N/569224,77Ø	Brown Trout	Salmo trutta	Muscle	36	560	<0,500	<0,500	<0,500	<0,500	<0,500	<0,500	<0,500	0.514	<0,500	<0,500	<0,500			<0,750		<0,750	<0,750	3.75			<0,750		0.624								<1,00	<0,750	<1,00				<1,00	<1,00
ENEV-LAN-B10	2019	AFFF	Evenes-Langvatnet		7599071,13N/569224,77Ø	Brown Trout	Salmo trutta	Muscle	34	282	<0,500	<0,500	<0,500	<0,500	<0,500	<0,500	<0,500	1.5	<0,500	<0,500	<0,500			<0,750		<0,750	<0,750	9.04			<0,750		0.593								<1,00	<0,750	<1,00				<1,00	<1,00
ENEV-LAN-B11	2019	AFFF	Evenes-Langvatnet		7599071,13N/569224,77Ø	Brown Trout	Salmo trutta	Muscle	25.25	190.2	<0,500	<0,500	<0,500	<0,500	<0,500	0.735	<0,500	3.63	<0,500	0.631	<0,500			<0,750		<0,750	<0,750	18.4			<0,750		0.514								<1,00	<0,750	<1,00				<1,00	<1,00
ENEV-LAN-B12	2019	AFFF	Evenes-Langvatnet		7599071,13N/569224,77Ø	Brown Trout	Salmo trutta	Muscle	33	343	<0,500	<0,500	0.55	<0,100	<0,400	0.496	0.211	3.73	<0,200	0.979	<0,200			<0,100		0.373	<0,100	52.3			0.281		0.544								<0,300	<0,300	<0,300				<1,00	<1,00
ENEV-LAN-B01	2019	AFFF	Evenes-Langvatnet		7599071,13N/569224,77Ø	Arctic char	Salvelinus alpinus	Muscle	47	890	<0,500	<0,500	1.24	<0,300	<0,500	<0,300	<0,300	<0,300	<0,300	<0,300	<0,300			<0,300		0.941	<0,300	2.86			<0,300		<0,500								<0,300	<0,300	<0,300				<1,00	<1,00
ENEV-LAN-B02	2019	AFFF	Evenes-Langvatnet		7599071,13N/569224,77Ø	Arctic char	Salvelinus alpinus	Muscle	33	357	<0,500	<0,500	1.78	<0,300	<0,500	<0,300	<0,300	<0,300	<0,300	<0,300	<0,300			<0,300		<0,300	<0,300	6.94			<0,300		<0,500								<0,300	<0,300	<0,300				<1,00	<1,00
ENEV-LAN-B03	2019	AFFF	Evenes-Langvatnet		7599071,13N/569224,77Ø	Arctic char	Salvelinus alpinus	Muscle	34	325	<0,500	<0,500	1.5	<0,300	<0,500	0.532	<0,300	0.351	<0,300	<0,300	<0,300			<0,300		<0,300	<0,300	14.1			<0,300		<0,500								<0,300	<0,300	<0,300				<1,00	<1,00
ENEV-LAN-B04	2019	AFFF	Evenes-Langvatnet		7599071,13N/569224,77Ø	Arctic char	Salvelinus alpinus	Muscle	31	320	<0,500	<0,500	1.68	<0,300	<0,500	0.392	<0,300	<0,300	<0,300	<0,300	<0,300			<0,300		<0,300	<0,300	8.52			<0,300		<0,500								<0,300	<0,300	<0,300				<1,00	<1,00
ENEV-LAN-B05	2019	AFFF	Evenes-Langvatnet		7599071,13N/569224,77Ø	Arctic char	Salvelinus alpinus	Muscle	32	313	<0,500	<0,500	1.88	<0,300	<0,500	0.36	<0,300	<0,300	<0,300	<0,300	<0,300			<0,300		<0,300	<0,300	13.3			<0,300		<0,500								<0,300	<0,300	<0,300				<1,00	<1,00
ENEV-LAN-B06	2019	AFFF	Evenes-Langvatnet		7599071,13N/569224,77Ø	Arctic char	Salvelinus alpinus	Muscle	33	345	<0,500	<0,500	1.52	<0,300	<0,500	0.345	<0,300	<0,300	<0,300	<0,300	<0,300			<0,300		<0,300	<0,300	8.36			<0,300		<0,500								<0,300	<0,300	<0,300				<1,00	<1,00
ENEV-LAN-B07	2019	AFFF	Evenes-Langvatnet		7599071,13N/569224,77Ø	Arctic char	Salvelinus alpinus	Muscle	30	265	<0,500	<0,500	1.47	<0,100	<0,400	0.514	<0,100	0.308	<0,200	<0,200	<0,200			<0,100		<0,100	<0,100	11.7			<0,100		<0,500								<0,300	<0,300	<0,300				<1,00	<1,00
ENEV-LAN-B08	2019	AFFF	Evenes-Langvatnet		7599071,13N/569224,77Ø	Arctic char	Salvelinus alpinus	Muscle	30	285	<0,500	<0,500	2.28	<0,100	<0,400	0.52	<0,100	0.359	<0,200	<0,200	<0,200			<0,100		0.126	<0,100	17			<0,100		<0,500								<0,300	<0,300	<0,300				<1,00	<1,00
ENEV-KJV-B01	2019	AFFF	Evenes-Kjerkvatnet		7596236,19N/568822,8Ø	Brown Trout	Salmo trutta	Muscle	57	1700	<0,500	<0,500	<0,500	<0,500	<0,500	<0,500	<0,500	<0,500	<0,500	<0,500	<0,500			<0,750		<0,750	<0,750	13.1			<0,750		<0,500								<1,00	<0,750	<1,00				<1,00	<1,00
ENEV-KJV-B02	2019	AFFF	Evenes-Kjerkvatnet		7596236,19N/568822,8Ø	Brown Trout	Salmo trutta	Muscle	49	1200	<0,500	<0,500	<0,500	<0,500	<0,500	<0,500	<0,500	<0,500	<0,500	<0,500	<0,500			<0,750		<0,750	<0,750	2.91			<0,750		<0,500								<1,00	<0,750	<1,00				<1,00	<1,00
ENEV-KJV-B03	2019	AFFF	Evenes-Kjerkvatnet		7596236,19N/568822,8Ø	Brown Trout	Salmo trutta	Muscle	55	2000	<0,500	<0,500	<0,500	<0,500	<0,500	<0,500	<0,500	<0,500	<0,500	<0,500	<0,500			<0,750		<0,750	<0,750	12.1			<0,750		<0,500								<1,00	<0,750	<1,00				<1,00	<1,00
ENEV-KJV-B04	2019	AFFF	Evenes-Kjerkvatnet		7596236,19N/568822,8Ø	Brown Trout	Salmo trutta	Muscle	49	1500	<0,500	<0,500	<0,500	<0,500	<0,500	<0,500	<0,500	<0,500	<0,500	<0,500	<0,500			<0,750		<0,750	<0,750	3.29			<0,750		<0,500								<1,00	<0,750	<1,00				<1,00	<1,00
ENEV-KJV-B05	2019	AFFF	Evenes-Kjerkvatnet		7596236,19N/568822,8Ø	Brown Trout	Salmo trutta	Muscle	41	850	<0,500	<0,500	<0,500	<0,500	<0,500	<0,500	<0,500	<0,500	<0,500	<0,500	<0,500			<0,750		<0,750	<0,750	3.88			<0,750		<0,500								<1,00	<0,750	<1,00				<1,00	<1,00
ENEV-KJV-B06	2019	AFFF	Evenes-Kjerkvatnet		7596236,19N/568822,8Ø	Brown Trout	Salmo trutta	Muscle	32	1300	<0,500	<0,500	<0,500	<0,500	<0,500	<0,500	<0,500	<0,500	<0,500	<0,500	<0,500			<0,750		<0,750	<0,750	8.96			<0,750		<0,500								<1,00	<0,750	<1,00				<1,00	<1,00
ENEV-KJV-B07	2019	AFFF	Evenes-Kjerkvatnet		7596236,19N/568822,8Ø	Brown Trout	Salmo trutta	Muscle	34	450	<0,500	<0,500	<0,500	<0,500	<0,500	<0,500	<0,500	<0,500	<0,500	<0,500	<0,500			<0,750		<0,750	<0,750	1.33			<0,750		<0,500								<1,00	<0,750	<1,00				<1,00	<1,00
ENEV-KJV-B08	2019	AFFF	Evenes-Kjerkvatnet		7596236,19N/568822,8Ø	Brown Trout	Salmo trutta	Muscle	45	2200	<0,500	<0,500	<0,500	<0,500	<0,500	<0,500	<0,500	<0,500	<0,500	<0,500	<0,500			<0,750		<0,750	<0,750	3.27			<0,750		<0,500								<1,00	<0,750	<1,00				<1,00	<1,00
ENEV-KJV-B09	2019	AFFF	Evenes-Kjerkvatnet		7596236,19N/568822,8Ø	Brown Trout	Salmo trutta	Muscle	38	1400	<0,500	<0,500	<0,500	<0,500	<0,500	<0,500	<0,500	<0,500	<0,500	<0,500	<0,500			<0,750		<0,750	<0,750	12.9			<0,750		<0,500								<1,00	<0,750	<1,00				<1,00	<1,00
ENEV-KJV-B10	2019	AFFF	Evenes-Kjerkvatnet		7596236,19N/568822,8Ø	Brown Trout	Salmo trutta	Muscle	35	1100	<0,500	<0,500	<0,500	<0,500	<0,500	<0,500	<0,500	<0,500	<0,500	<0,500	<0,500			<0,750		<0,750	<0,750	12.8			<0,750		<0,500								<1,00	<0,750	<1,00				<1,00	<1,00
SB-Liten-Abbor	2013	AFFF	Rygge-Vansjø			Perch	Perca fluviatilis	Muscle	26	205	<0,0446	<0,0446	<0,0446	<0,0446	<0,0446	<0,0446	0.227							<0,0669		<0,0669		10														<0,0669	0.17
SB-Middels-Abbor	2013	AFFF	Rygge-Vansjø			Perch	Perca fluviatilis	Muscle	33.1	433	<0,0528	<0,0528	<0,0528	<0,0528	<0,0528	<0,0528	0.425							<0,0791		<0,0791		21.2														<0,0791	0.583
SB-Stor-Abbor	2013	AFFF	Rygge-Vansjø			Perch	Perca fluviatilis	Muscle	35.75	555	<0,0488	<0,0488	<0,0488	<0,0488	<0,0488	<0,0488	0.29							<0,0732		<0,0732		15.4														<0,0732	0.607
SB-XL-Abbor	2013	AFFF	Rygge-Vansjø			Perch	Perca fluviatilis	Muscle	43	1135	<0,0472	<0,0472	<0,0472	<0,0472	<0,0472	<0,0472	0.488							<0,0708		<0,0708		24.3														<0,0708	0.35
SB-Liten-Gjedde	2013	AFFF	Rygge-Vansjø			Pike	Esox lucius	Muscle	58.5	1025	<0,0456	<0,0456	<0,0456	<0,0456	<0,0456	<0,0456	0.105							<0,0684		<0,0684		6.47														<0,0684	<0,0912
SB-Middels/Liten - Gjedde	2013	AFFF	Rygge-Vansjø			Pike	Esox lucius	Muscle	66.25	1564.75	<0,0532	<0,0532	<0,0532	<0,0532	<0,0532	<0,0532	0.176							<0,0798		<0,0798		8.3														<0,0798	<0,106
SB-Middels-Gjedde	2013	AFFF	Rygge-Vansjø			Pike	Esox lucius	Muscle	70.3333	2045	<0,0503	<0,0503	<0,0503	<0,0503	<0,0503	0.061	0.268							<0,0754		0.151		24														<0,0754	0.267
SB-Stor-Gjedde	2013	AFFF	Rygge-Vansjø			Pike	Esox lucius	Muscle	87	3400	<0,0544	<0,0544	<0,0544	<0,0544	<0,0544	<0,0544	0.185							<0,0816		<0,0816		10.3														<0,0816	0.118
SB-Liten-Gjørs	2013	AFFF	Rygge-Vansjø			Zander	Sander lucioperca	Muscle	33.25	266.25	<0,0397	<0,0397	<0,0397	<0,0397	<0,0397	<0,0397	0.18							<0,0596		<0,0596		10.5														<0,0596	<0,0795
SB-Stor-Gjørs	2013	AFFF	Rygge-Vansjø			Zander	Sander lucioperca	Muscle	50.5	912.5	<0,045	<0,045	<0,045	<0,045	<0,045	<0,045	0.178							<0,0676		<0,0676		12														<0,0676	0.165
KØ-Middels-Abbor	2013	AFFF	Rygge-Vansjø			Perch	Perca fluviatilis	Muscle	32.75	447.5	<0,0503	<0,0503	<0,0503	<0,0503	<0,0503	<0,0503	0.324							<0,0755		<0,0755		15.1														<0,0755	0.202
KØ-Middels+ -Abbor	2013	AFFF	Rygge-Vansjø			Perch	Perca fluviatilis	Muscle	34	525	<0,0428	<0,0428	<0,0428	<0,0428	<0,0428	0.0446	0.416							<0,0642		<0,0642		20.4														<0,0642	0.257
KØ-XL-Abbor	2013	AFFF	Rygge-Vansjø			Perch	Perca fluviatilis	Muscle	44	1247.5	<0,0527	<0,0527	<0,0527	<0,0527	<0,0527	<0,0527	0.338							<0,079		<0,079		17.8														<0,079	0.462
KØ-Middles/liten-Gjedde	2013	AFFF	Rygge-Vansjø			Pike	Esox lucius	Muscle	63.5	1585	<0,0612	<0,0612	<0,0612	<0,0612	<0,0612	<0,0612	0.211							<0,0918		<0,0918		10														<0,0918	0.268
KØ-Stor-Gjedde	2013	AFFF	Rygge-Vansjø			Pike	Esox lucius	Muscle	85.3333	3895	<0,0628	<0,0628	<0,0628	<0,0628	<0,0628	<0,0628	0.1							<0,0941		<0,0941		5.39														<0,0941	<0,126
KØ-Liten-Gjørs	2013	AFFF	Rygge-Vansjø			Zander	Sander lucioperca	Muscle	31.6667	240	<0,0494	<0,0494	<0,0494	<0,0494	<0,0494	<0,0494	0.196							<0,0741		<0,0741		12.8														<0,0741	<0,0988
KØ-Stor-Gjørs	2013	AFFF	Rygge-Vansjø			Zander	Sander lucioperca	Muscle	51.75	1092.5	<0,0536	<0,0536	<0,0536	<0,0536	<0,0536	<0,0536	0.196							<0,0804		<0,0804		11.5														<0,0804	<0,107
GB-Middels+ - Abbor	2013	AFFF	Rygge-Vansjø			Perch	Perca fluviatilis	Muscle	34	454	<0,0469	<0,0469	<0,0469	<0,0469	<0,0469	<0,0469	0.391							<0,0703		<0,0703		21.2														<0,0703	0.402
GB-Middels++ - Abbor	2013	AFFF	Rygge-Vansjø			Perch	Perca fluviatilis	Muscle	35.25	509.5	<0,0461	<0,0461	<0,0461	<0,0461	<0,0461	<0,0461	0.35							<0,0691		<0,0691		17.8														<0,0691	0.332
GB-XL-Abbor	2013	AFFF	Rygge-Vansjø			Perch	Perca fluviatilis	Muscle	41	889.667	<0,0492	<0,0492	<0,0492	<0,0492	<0,0492	<0,0492	0.4							<0,0738		<0,0738		25.2														<0,0738	0.3
GB-Liten/Middels-Gjedde	2013	AFFF	Rygge-Vansjø			Pike	Esox lucius	Muscle	63.3333	1415	<0,0462	<0,0462	<0,0462	<0,0462	<0,0462	<0,0462	0.189							<0,0693		0.0721		11.5														<0,0693	<0,0924
GB-Middels-Gjedde	2013	AFFF	Rygge-Vansjø			Pike	Esox lucius	Muscle	69.25	1912.5	<0,0492	<0,0492	<0,0492	<0,0492	<0,0492	<0,0492	0.175							<0,0737		<0,0737		9.52														<0,0737	<0,0983
GB-Stor-Gjedde	2013	AFFF	Rygge-Vansjø			Pike	Esox lucius	Muscle	81	3277.5	<0,0518	<0,0518	<0,0518	<0,0518	<0,0518	0.0643	0.374							<0,0778		<0,0778		20.2														<0,0778	<0,104
GB-Liten-Gjørs	2013	AFFF	Rygge-Vansjø			Zander	Sander lucioperca	Muscle	30	236.333	<0,0443	<0,0443	<0,0443	<0,0443	<0,0443	<0,0443	0.137							<0,0664		<0,0664		9.71														<0,0664	0.1
GB-Stor-Gjørs	2013	AFFF	Rygge-Vansjø			Zander	Sander lucioperca	Muscle	48	827.75	<0,0678	<0,0678	<0,0678	<0,0678	<0,0678	<0,0678	0.157							0.102		<0,102		8.97														<0,102	0.166
FK-Stor-Abbor	2013	AFFF	Rygge-Vansjø			Perch	Perca fluviatilis	Muscle	34.6667	468.333	<0,0547	<0,0547	<0,0547	<0,0547	<0,0547	<0,0547	0.372							<0,0821		0.215		54.6														<0,0821	4.84
FK-XL-Abbor	2013	AFFF	Rygge-Vansjø			Perch	Perca fluviatilis	Muscle	42	835	<0,0571	<0,0571	<0,0571	<0,0571	<0,0571	<0,0571	0.176							<0,0856		<0,0856		18.7														<0,0856	2.83
FK-Liten/Middels-Gjedde	2013	AFFF	Rygge-Vansjø			Pike	Esox lucius	Muscle	64.6667	1533.33	<0,0588	<0,0588	<0,0588	<0,0588	<0,0588	<0,0588	0.218							<0,0882		0.215		36.9														<0,0882	2.01
FK-Middels-Gjedde	2013	AFFF	Rygge-Vansjø			Pike	Esox lucius	Muscle	75	2560	<0,0536	<0,0536	<0,0536	<0,0536	<0,0536	0.0552	0.4							<0,0804		0.485		67.7														<0,0804	1.22
FK-Stor-Gjedde	2013	AFFF	Rygge-Vansjø			Pike	Esox lucius	Muscle	87	4045	<0,0592	<0,0592	<0,0592	<0,0592	<0,0592	0.0641	0.244							<0,0888		0.657		73.4														<0,0888	0.905
FK-Middels-Gjørs	2013	AFFF	Rygge-Vansjø			Zander	Sander lucioperca	Muscle	47.25	836.75	<0,0505	<0,0505	<0,0505	<0,0505	<0,0505	<0,0505	0.134							<0,0758		0.142		21														<0,0758	1.18
FK-Stor-Gjørs	2013	AFFF	Rygge-Vansjø			Zander	Sander lucioperca	Muscle	54	1300	<0,0496	<0,0496	<0,0496	<0,0496	<0,0496	<0,0496	0.223							<0,0744		0.258		34.1														<0,0744	1.52
GØ-Liten-Abbor	2013	AFFF	Rygge-Vansjø			Perch	Perca fluviatilis	Muscle	28.3333	270	<0,0513	<0,0513	<0,0513	<0,0513	<0,0513	<0,0513	0.321							<0,0769		<0,0769		12.4														<0,0769	0.212
GØ-Middels-Abbor	2013	AFFF	Rygge-Vansjø			Perch	Perca fluviatilis	Muscle	32.25	392.5	<0,0463	<0,0463	<0,0463	<0,0463	<0,0463	<0,0463	0.29							<0,0694		<0,0694		10.4														<0,0694	0.112
GØ-Middels+ -Abbor	2013	AFFF	Rygge-Vansjø			Perch	Perca fluviatilis	Muscle	35	460	<0,0484	<0,0484	<0,0484	<0,0484	<0,0484	<0,0484	0.368							<0,0726		<0,0726		13.9														<0,0726	0.131
GØ-Stor-Abbor	2013	AFFF	Rygge-Vansjø			Perch	Perca fluviatilis	Muscle	42	925	<0,0509	<0,0509	<0,0509	<0,0509	<0,0509	<0,0509	0.365							<0,0763		<0,0763		13.6														<0,0763	0.228
GØ-Liten/Middels-Gjedde	2013	AFFF	Rygge-Vansjø			Pike	Esox lucius	Muscle	62.6	1343	<0,0455	<0,0455	<0,0455	<0,0455	<0,0455	<0,0455	0.169							<0,0682		<0,0682		7.88														<0,0682	<0,091
GØ-Stor-Gjedde	2013	AFFF	Rygge-Vansjø			Pike	Esox lucius	Muscle	90.5	4800	<0,0541	<0,0541	<0,0541	<0,0541	<0,0541	<0,0541	0.214							<0,0812		<0,0812		10.9														<0,0812	<0,108
GØ-Liten-Gjørs	2013	AFFF	Rygge-Vansjø			Zander	Sander lucioperca	Muscle	29	160	<0,0637	<0,0637	<0,0637	<0,0637	<0,0637	<0,0637	0.123							<0,0955		<0,0955		5.15														<0,0955	<0,127
GØ-Middels-Gjørs	2013	AFFF	Rygge-Vansjø			Zander	Sander lucioperca	Muscle	44	547.5	<0,053	<0,053	<0,053	<0,053	<0,053	<0,053	0.127							<0,0795		<0,0795		8.27														<0,0795	<0,106
GØ-Stor-Gjørs	2013	AFFF	Rygge-Vansjø			Zander	Sander lucioperca	Muscle	53	1100	<0,0547	<0,0547	<0,0547	<0,0547	<0,0547	<0,0547	0.117							<0,0821		<0,0821		5.66														<0,0821	<0,109
BR-A-1	2018	Paper industry	Lake Tyrifjorden			Perch	Perca fluviatilis	Liver	28.5	253.9		<0,5	<0,5	<0,5	<0,5	0.44	17.96	17.81	24.95	2.67	5.58	<0,4	<0,4	<0,1	<0,1	<0,1	<0,1	91.7	2.32	<0,1	0.24	<0,2	0.69	<0,3	<0,3	<2	<2	<0,3	<0,3	0.31	<0,3	<0,3	<0,3	0.41	4.7	<0,3
BR-A-2	2018	Paper industry	Lake Tyrifjorden			Perch	Perca fluviatilis	Liver	32.5	525.1		<0,5	<0,5	<0,5	<0,5	<0,4	5.09	9.56	14.58	10	6.75	<0,4	<0,4	<0,1	<0,1	<0,1	<0,1	77.6	4.07	<0,1	<0,1	<0,2	0.6	<0,3	<0,3	<2	<2	<0,3	<0,3	1.06	<0,3	<0,3	1.28	2.21	10.2	0.42
NF-A-1	2018	Paper industry	Lake Tyrifjorden			Perch	Perca fluviatilis	Liver	24	177.8		<0,5	<0,5	<0,5	<0,5	<0,5	14.0267	20.5651	33.8852	21.18	10.4673	0.87	<0,4	<0,1	<0,1	<0,1	0.27	101	9	<0,1	<0,1	<0,2	3.56401	<0,3	<0,3	<2	<2	0.35423	<0,3	2.43249	<0,3	<0,3	0.7099	4.00315	18.4445	1
NF-A-2	2018	Paper industry	Lake Tyrifjorden			Perch	Perca fluviatilis	Liver	24.4	171.4		<0,5	<0,5	<0,5	<0,5	<0,5	3.81319	5.94306	11.023	6.70727	3.60071	<0,4	<0,4	<0,1	<0,1	<0,1	0.17	131	3.9	<0,1	<0,1	<0,2	0.19117	<0,3	<0,3	<2	<2	<0,3	<0,3	1.91043	<0,3	<0,3	2.94689	3.67976	7.13717	0.4
NF-A-3	2018	Paper industry	Lake Tyrifjorden			Perch	Perca fluviatilis	Liver	27.4	204.4		<0,5	<0,5	<0,5	<0,5	<0,5	22.201	26.5757	42.6373	28.7667	13.2535	1.1	<0,4	<0,1	<0,1	<0,1	<0,1	109	5	<0,1	<0,1	<0,2	0.9482	<0,3	<0,3	<2	<2	<0,3	<0,3	1.07948	<0,3	<0,3	0.35241	2.60374	14.7684	0.6
NF-A-4	2018	Paper industry	Lake Tyrifjorden			Perch	Perca fluviatilis	Liver	26.1	217.2		<0,5	<0,5	<0,5	<0,5	<0,5	4.72788	6.17605	10.3859	6.3993	3.52346	<0,4	<0,4	<0,1	<0,1	<0,1	<0,1	36	2.3	<0,1	<0,1	<0,2	2.15711	<0,3	<0,3	<2	<2	<0,3	<0,3	1.03066	<0,3	0.6	0.47819	0.96107	3.19983	<0,3
NF-A-5	2018	Paper industry	Lake Tyrifjorden			Perch	Perca fluviatilis	Liver	22.5	139.9		<0,5	<0,5	<0,5	<0,5	<0,5	1.6005	2.14614	7.88444	4.43389	3.66367	<0,4	<0,4	<0,1	<0,1	<0,1	0.19	84	3.6	<0,1	<0,1	<0,2	0.72336	<0,3	<0,3	<2	<2	<0,3	<0,3	5.11367	<0,3	<0,3	0.83015	3.87909	6.91479	0.5
SF-A-1	2018	Paper industry	Lake Tyrifjorden			Perch	Perca fluviatilis	Liver	31.7	321.7		<0,5	<0,5	5.2	3.9	1.3	18.1575	11.3729	12.0255	8.8915	1.93751	<0,4	<0,4	<0,1	<0,1	<0,1	<0,1	163	1	<0,1	<0,1	<0,2	0.14702	<0,3	<0,3	<2	<2	<0,3	<0,3	0.25025	<0,3	<0,3	0.14702	0.2618	0.40988	<0,3
SF-A-2	2018	Paper industry	Lake Tyrifjorden			Perch	Perca fluviatilis	Liver	26.5	195.2		<0,5	<0,5	<0,5	<0,5	<0,5	17.9886	10.1918	6.38038	4.97305	1.20328	<0,4	<0,4	<0,1	<0,1	<0,1	<0,1	158	1.4	<0,1	<0,1	<0,2	0.36229	<0,3	<0,3	<2	<2	<0,3	<0,3	0.46714	<0,3	<0,3	0.36229	0.12202	0.32787	<0,3
SF-A-3	2018	Paper industry	Lake Tyrifjorden			Perch	Perca fluviatilis	Liver	31	319.7		<0,5	<0,5	<0,5	<0,5	<0,5	14.7702	9.52633	7.5585	7.09035	1.64566	<0,4	<0,4	<0,1	<0,1	<0,1	<0,1	146	0.8	<0,1	<0,1	<0,2	0.07863	<0,3	<0,3	<2	<2	<0,3	<0,3	<0,3	<0,3	<0,3	0.07863	0.33494	0.43615	<0,3
SF-A-4	2018	Paper industry	Lake Tyrifjorden			Perch	Perca fluviatilis	Liver	30.5	326.3		<0,5	<0,5	<0,5	<0,5	<0,5	14.9244	10.8048	9.98122	8.33717	2.28344	<0,4	<0,4	<0,1	<0,1	<0,1	<0,1	111	0.7	<0,1	<0,1	<0,2	0.23664	<0,3	<0,3	<2	<2	<0,3	<0,3	<0,3	<0,3	<0,3	0.23664	0.31057	0.59354	<0,3
SF-A-5	2018	Paper industry	Lake Tyrifjorden			Perch	Perca fluviatilis	Liver	31.5	345		<0,5	<0,5	<0,5	<0,5	<0,5	15.1023	9.70908	11.1788	7.88938	1.62643	<0,4	<0,4	<0,1	<0,1	<0,1	<0,1	133	0.9	<0,1	<0,1	<0,2	<0,1	<0,3	<0,3	<2	<2	<0,3	<0,3	<0,3	<0,3	<0,3	0.01635	0.22341	0.40786	<0,3
SØ-A-1	2018	Paper industry	Lake Tyrifjorden			Perch	Perca fluviatilis	Liver	28.3	261		<0,5	3.6	16.8	18.5	7.99192	96.8207	162.776	284.763	222.341	109.942	1.7	<0,4	<0,1	<0,1	<0,1	0.27	527.786	7.1	<0,1	1.73	<0,2	10.4985	<0,3	<0,3	<2	<2	<0,3	<0,3	0.8904	<0,3	0.6	<0,3	3.2449	14.4954	<0,3
SØ-A-2	2018	Paper industry	Lake Tyrifjorden			Perch	Perca fluviatilis	Liver	30.2	345.7		<0,5	<0,5	2.1	2.1	0.91855	10.463	17.7966	24.2464	10.2932	7.22489	1.2	<0,4	<0,1	<0,1	<0,1	<0,1	98.4079	3	<0,1	<0,1	<0,2	0.41204	<0,3	<0,3	<2	<2	<0,3	<0,3	0.33944	<0,3	1.1	<0,3	0.16535	1.22421	<0,3
SØ-A-3	2018	Paper industry	Lake Tyrifjorden			Perch	Perca fluviatilis	Liver	28.1	251.4		<0,5	1.1	8.3	8.1	4.13856	9.69697	13.1687	22.3189	12.2734	6.01689	<0,4	<0,4	<0,1	<0,1	<0,1	0.24	121.997	2.9	<0,1	0.2	<0,2	0.98306	<0,3	<0,3	<2	<2	<0,3	<0,3	0.62838	<0,3	2.2	<0,3	0.79754	2.61258	<0,3
SØ-A-4	2018	Paper industry	Lake Tyrifjorden			Perch	Perca fluviatilis	Liver	26.7	264		<0,5	<0,5	2.6	2.5	1.87647	11.3295	16.4192	24.6252	10.3678	6.88941	<0,4	<0,4	<0,1	<0,1	<0,1	0.19	108.745	3.2	<0,1	<0,1	<0,2	1.15614	<0,3	<0,3	<2	<2	<0,3	<0,3	0.4377	<0,3	0.9	<0,3	0.46963	1.76359	<0,3
SØ-A-5	2018	Paper industry	Lake Tyrifjorden			Perch	Perca fluviatilis	Liver	26.2	219.6		<0,5	0.9	5.5	5.2	2.96091	16.5442	23.6727	32.8768	17.1739	6.36097	<0,4	<0,4	<0,1	<0,1	<0,1	0.26	81.5996	2.3	<0,1	0.17	<0,2	1.31051	<0,3	<0,3	<2	<2	<0,3	<0,3	0.48264	<0,3	1.2	<0,3	0.35319	1.28978	<0,3
VI-A-1	2018	Paper industry	Lake Tyrifjorden			Perch	Perca fluviatilis	Liver	29.2	281.3		<0,5	<0,5	<0,5	<0,5	1.11788	22.7234	19.1756	14.5455	7.44821	7.01897	<0,4	<0,4	<0,1	<0,1	<0,1	<0,1	161.323	2.9	<0,1	<0,1	<0,2	0.28221	<0,3	<0,3	<2	<2	<0,3	<0,3	0.44053	<0,3	<0,3	<0,3	0.63161	4.4058	<0,3
VI-A-2	2018	Paper industry	Lake Tyrifjorden			Perch	Perca fluviatilis	Liver	27.1	228.2		<0,5	<0,5	<0,5	4.11	0.97261	29.2706	57.7548	41.1514	25.8543	15.487	<0,4	<0,4	<0,1	<0,1	<0,1	<0,1	155.573	2.3	<0,1	<0,1	<0,2	0.50652	<0,3	<0,3	<2	<2	<0,3	<0,3	0.32737	<0,3	<0,3	<0,3	1.68139	6.25809	<0,3
VI-A-3	2018	Paper industry	Lake Tyrifjorden			Perch	Perca fluviatilis	Liver	26.5	199.5		<0,5	<0,5	<0,5	<0,5	0.61266	9.68716	10.369	10.3873	7.65605	9.46929	<0,4	<0,4	<0,1	<0,1	<0,1	<0,1	57.3703	1.2	<0,1	<0,1	<0,2	0.13553	<0,3	<0,3	<2	<2	<0,3	<0,3	1.27711	<0,3	<0,3	<0,3	0.78411	5.44055	<0,3
VI-A-4	2018	Paper industry	Lake Tyrifjorden			Perch	Perca fluviatilis	Liver	25.6	196.6		<0,5	<0,5	<0,5	<0,5	0.95812	20.0282	22.12	32.5061	9.8964	9.48561	<0,4	<0,4	<0,1	<0,1	<0,1	<0,1	196.823	2.8	<0,1	<0,1	<0,2	<0,1	<0,3	<0,3	<2	<2	<0,3	<0,3	0.93458	<0,3	<0,3	<0,3	0.80405	4.23623	<0,3
VI-A-5	2018	Paper industry	Lake Tyrifjorden			Perch	Perca fluviatilis	Liver	25.2	176.3		<0,5	<0,5	<0,5	4.52	2.52939	30.8668	27.2457	22.9431	12.6899	13.0674	<0,4	<0,4	<0,1	<0,1	<0,1	<0,1	291.063	5.1	<0,1	<0,1	<0,2	1.83104	<0,3	<0,3	<2	<2	<0,3	<0,3	2.7117	<0,3	0.77	<0,3	1.82657	10.1847	0.33
VU-A-1	2018	Paper industry	Lake Tyrifjorden			Perch	Perca fluviatilis	Liver	25.2	191.8		<0,5	1.18	<0,5	<0,5	<0,5	17.3249	9.2226	22.2717	17.0674	11.0746	0.7	<0,4	<0,1	<0,1	<0,1	0.19	203	8.3	<0,1	<0,1	<0,2	5.55699	<0,3	<0,3	<2	<2	<0,3	<0,3	5.27853	<0,3	0.9	6.70446	37.509	16.1945	<0,3
VU-A-2	2018	Paper industry	Lake Tyrifjorden			Perch	Perca fluviatilis	Liver	24.1	185.3		<0,5	1.21	<0,5	<0,5	<0,5	33.7842	15.1262	39.2226	17.1757	12.5402	0.6	<0,4	<0,1	<0,1	<0,1	1.61	640.1	87.9	<0,1	<0,1	<0,2	18.5538	<0,3	<0,3	<2	<2	0.79942	<0,3	55.9261	<0,3	<0,3	3.12385	28.0621	27.8967	0.6
VU-A-3	2018	Paper industry	Lake Tyrifjorden			Perch	Perca fluviatilis	Liver	27.2	259.7		<0,5	<0,5	<0,5	<0,5	<0,5	16.0363	14.8511	96.241	31.6402	52.3293	1	<0,4	<0,1	<0,1	<0,1	0.36	291.4	38.1	<0,1	<0,1	<0,2	195.2	<0,3	<0,3	<2	<2	0.62243	<0,3	63.951	<0,3	<0,3	5.4675	42.4273	55.565	1.3
VU-A-4	2018	Paper industry	Lake Tyrifjorden			Perch	Perca fluviatilis	Liver	28.5	325.1		<0,5	<0,5	<0,5	<0,5	<0,5	36.5203	24.4978	27.1595	25.1191	10.5535	0.7	<0,4	<0,1	<0,1	<0,1	0.79	402.4	26.7	<0,1	<0,1	<0,2	2.47301	<0,3	<0,3	<2	<2	<0,3	<0,3	6.49403	<0,3	<0,3	14.25	19.6508	11.4347	<0,3
VU-A-5	2018	Paper industry	Lake Tyrifjorden			Perch	Perca fluviatilis	Liver	27	209.9		<0,5	1.1	<0,5	<0,5	<0,5	23.3198	7.76071	25.2256	9.05697	7.01711	<0,4	<0,4	<0,1	<0,1	<0,1	0.48	320.4	21.8	<0,1	<0,1	<0,2	0.46121	<0,3	<0,3	<2	<2	<0,3	<0,3	6.55482	<0,3	<0,3	5.66578	29.0618	10.2442	<0,3
SF-B-1	2018	Paper industry	Lake Tyrifjorden			Bream	Abramis brama	Liver	31.6	342.1		<0,5	<0,5	10.3	8.4	3.8	25.3998	15.1386	5.63795	2.52109	<0,4	<0,4	<0,4	<0,1	<0,1	<0,1	<0,1	83	1.03	<0,1	<0,1	<0,2	2.46213	<0,3	<0,3	<2	<2	0.27049	<0,3	0.41709	<0,3	<0,3	2.46213	0.56843	0.83979	<0,3
SF-B-2	2018	Paper industry	Lake Tyrifjorden			Bream	Abramis brama	Liver	31.2	307		<0,5	<0,5	<0,5	<0,5	<0,5	36.466	21.9778	7.31645	2.74755	<0,4	<0,4	<0,4	<0,1	<0,1	<0,1	<0,1	97	0.01	<0,1	<0,1	<0,2	8.88804	<0,3	<0,3	<2	<2	0.54531	<0,3	0.94159	<0,3	<0,3	8.88804	0.812	0.72483	<0,3
NF-G-1	2018	Paper industry	Lake Tyrifjorden			Pike	Esox lucius	Liver	56.1	1028		<0,5	<0,5	<0,5	1.01	1.11	15.51	38.18	33.5	5.1	11.27	<0,4	<0,4	<0,1	<0,1	<0,1	<0,1	29.8	1.41	<0,1	0.27	<0,2	5.1	<0,3	<0,3	<2	<2	<0,3	<0,3	<0,3	<0,3	<0,3	<0,3	<0,3	1.05	<0,3
NF-G-2	2018	Paper industry	Lake Tyrifjorden			Pike	Esox lucius	Liver	46.9	581		<0,5	<0,5	<0,5	<0,5	<0,5	8.6873	12.9265	22.2013	13.0306	5.43265	0.65	<0,4	<0,1	<0,1	<0,1	0.26	65	1.1	<0,1	<0,1	<0,2	10.6499	<0,3	<0,3	<2	<2	<0,3	<0,3	<0,3	<0,3	<0,3	0.2136	0.96094	3.55106	<0,3
SF-G-1	2018	Paper industry	Lake Tyrifjorden			Pike	Esox lucius	Liver	49.2	701.7		<0,5	<0,5	<0,5	<0,5	<0,5	9.22087	5.48954	3.91131	3.18469	1.89631	<0,4	<0,4	<0,1	<0,1	<0,1	<0,1	78	0.46	<0,1	<0,1	<0,2	1.83067	<0,3	<0,3	<2	<2	<0,3	<0,3	0.30513	<0,3	<0,3	1.83067	0.28086	0.68025	<0,3
SF-G-2	2018	Paper industry	Lake Tyrifjorden			Pike	Esox lucius	Liver	57.7	1188		<0,5	<0,5	<0,5	<0,5	<0,5	5.79726	3.30687	2.68037	2.46769	0.26387	<0,4	<0,4	<0,1	<0,1	<0,1	<0,1	51	0.17	<0,1	<0,1	<0,2	1.46852	<0,3	<0,3	<2	<2	<0,3	<0,3	<0,3	<0,3	<0,3	1.46852	0.07135	0.21339	<0,3
SF-G-3	2018	Paper industry	Lake Tyrifjorden			Pike	Esox lucius	Liver	50.3	690.3		<0,5	<0,5	<0,5	<0,5	<0,5	23.288	18.8632	13.2441	17.2586	1.85898	<0,4	<0,4	<0,1	<0,1	<0,1	<0,1	110	0.46	<0,1	<0,1	<0,2	2.30133	<0,3	<0,3	<2	<2	<0,3	<0,3	<0,3	<0,3	<0,3	2.30133	0.15819	0.45368	<0,3
SF-G-4	2018	Paper industry	Lake Tyrifjorden			Pike	Esox lucius	Liver	43.5	501.3		<0,5	<0,5	<0,5	<0,5	3.7	6.84537	4.60921	2.91603	3.65013	0.35837	<0,4	<0,4	<0,1	<0,1	<0,1	<0,1	46	0.18	<0,1	<0,1	<0,2	1.7499	<0,3	<0,3	<2	<2	<0,3	<0,3	<0,3	<0,3	<0,3	1.7499	1.40679	0.28042	<0,3
SF-G-5	2018	Paper industry	Lake Tyrifjorden			Pike	Esox lucius	Liver	51.4	816.1		<0,5	<0,5	<0,5	<0,5	2.6	7.68541	3.95631	3.0133	2.42212	<0,4	<0,4	<0,4	<0,1	<0,1	<0,1	<0,1	56	0.18	<0,1	<0,1	<0,2	0.92965	<0,3	<0,3	<2	<2	<0,3	<0,3	<0,3	<0,3	<0,3	0.92965	0.03847	0.17854	<0,3
SØ-G-1	2018	Paper industry	Lake Tyrifjorden			Pike	Esox lucius	Liver	50.5	772.1		<0,5	<0,5	<0,5	<0,5	0.47	5.63	6.45	9.56	0.41	3.03	<0,4	<0,4	<0,1	<0,1	<0,1	<0,1	26.8	0.61	<0,1	<0,1	<0,2	0.8	<0,3	<0,3	<2	<2	<0,3	<0,3	<0,3	<0,3	<0,3	<0,3	<0,3	1.58	<0,3
SØ-G-2	2018	Paper industry	Lake Tyrifjorden			Pike	Esox lucius	Liver	56.2	1027		<0,5	<0,5	<0,5	2.74	0.78	7.15	9.83	13.78	5.05	4.77	<0,4	<0,4	<0,1	<0,1	<0,1	<0,1	22.8	0.35	<0,1	<0,1	<0,2	3.7	<0,3	<0,3	<2	<2	<0,3	<0,3	<0,3	<0,3	<0,3	<0,3	<0,3	0.69	<0,3
SØ-G-3	2018	Paper industry	Lake Tyrifjorden			Pike	Esox lucius	Liver	59.9	1624		<0,5	<0,5	<0,5	<0,5	<0,4	6.24	9.72	11.64	10.25	5.23	<0,4	<0,4	<0,1	<0,1	<0,1	<0,1	57	0.81	<0,1	<0,1	<0,2	0.7	<0,3	<0,3	<2	<2	<0,3	<0,3	0.29	<0,3	<0,3	<0,3	0.52	2.67	<0,3
VU-G-1	2018	Paper industry	Lake Tyrifjorden			Pike	Esox lucius	Liver	34.8	232.8		<0,5	1.26	<0,5	<0,5	<0,5	6.436	4.06661	<0,4	3.84776	2.64486	<0,4	<0,4	<0,1	<0,1	<0,1	<0,1	47.8	0.93	<0,1	<0,1	<0,2	20.8676	<0,3	<0,3	<2	<2	0.36903	<0,3	1.34857	<0,3	<0,3	1.72938	6.9536	5.33094	<0,3
VU-G-2	2018	Paper industry	Lake Tyrifjorden			Pike	Esox lucius	Liver	46.9	691.6		<0,5	<0,5	<0,5	<0,5	<0,5	1.71072	<0,4	<0,4	2.44478	1.77538	<0,4	<0,4	<0,1	<0,1	<0,1	<0,1	22.46	0.83	<0,1	<0,1	<0,2	64.591	<0,3	<0,3	<2	<2	<0,3	<0,3	4.3475	<0,3	<0,3	0.39977	1.94715	2.01892	<0,3
VU-G-3	2018	Paper industry	Lake Tyrifjorden			Pike	Esox lucius	Liver	90.5	4965		<0,5	<0,5	<0,5	<0,5	0.76	5.28	4.98	6.69	10.2	3.44	<0,4	<0,4	<0,1	<0,1	<0,1	<0,1	83.4	3.45	<0,1	<0,1	<0,2	139.5	<0,3	<0,3	<2	<2	<0,3	<0,3	2.78	<0,3	<0,3	1.19	3.65	2.92	<0,3
VU-G-4	2018	Paper industry	Lake Tyrifjorden			Pike	Esox lucius	Liver	49.9	572.1		<0,5	1.37	<0,5	<0,5	<0,5	3.76836	2.4349	4.1478	3.26225	3.08273	<0,4	<0,4	<0,1	<0,1	<0,1	<0,1	40.3	0.98	<0,1	<0,1	<0,2	168.8	<0,3	1.43469	<2	<2	<0,3	<0,3	6.38657	<0,3	<0,3	1.11927	3.99118	4.36685	<0,3
NF-M-01	2018	Paper industry	Lake Tyrifjorden			Roach	Rutilus rutilus	Liver	28.86	276.68		<0,5	<0,5	<0,5	<0,5	<0,5	4.44094	6.32753	10.9088	2.62753	3.1665	<0,4	<0,4	<0,1	<0,1	<0,1	<0,1	27	1.6	<0,1	<0,1	<0,2	6.9	<0,3	<0,3	<2	<2	0.67286	<0,3	0.36243	<0,3	<0,3	<0,3	1.7	4.01251	<0,3
SF-M-1	2018	Paper industry	Lake Tyrifjorden			Roach	Rutilus rutilus	Liver	27.04	216.78		<0,5	<0,5	<0,5	<0,5	<0,5	3.93426	6.34809	5.40142	4.18499	<0,4	<0,4	<0,4	<0,1	<0,1	<0,1	<0,1	8	0.12	<0,1	0.71	<0,2	0.26424	<0,3	<0,3	<2	<2	<0,3	<0,3	<0,3	<0,3	<0,3	0.26424	0.88126	1.01039	<0,3
SØ-M-1	2018	Paper industry	Lake Tyrifjorden			Roach	Rutilus rutilus	Liver	28.32	264.24		<0,5	<0,5	<0,5	<0,5	<0,5	17.4747	31.1293	44.4322	9.89417	10.5002	<0,4	<0,4	<0,1	<0,1	<0,1	<0,1	71	1.27	<0,1	0.84	<0,2	10.8872	<0,3	<0,3	<2	<2	2.16084	<0,3	0.27997	<0,3	<0,3	10.8872	7.29152	25.3195	<0,3
SØ-M-6	2018	Paper industry	Lake Tyrifjorden			Roach	Rutilus rutilus	Liver	29.12	291.04		<0,5	<0,5	<0,5	<0,5	0.17505	2.16199	4.6939	4.48179	2.34956	2.63674	<0,4	<0,4	<0,1	<0,1	<0,1	<0,1	24.0626	0.24	<0,1	<0,1	<0,2	0.75851	<0,3	<0,3	<2	<2	<0,3	<0,3	<0,3	<0,3	0.41	<0,3	0.71176	4.01993	<0,3
SØ-M-11	2018	Paper industry	Lake Tyrifjorden			Roach	Rutilus rutilus	Liver	28.82	286.32		<0,5	<0,5	<0,5	<0,5	0.39532	10.5445	24.7464	46.6478	11.7055	14.9486	<0,4	<0,4	<0,1	<0,1	<0,1	<0,1	60.5263	0.57	<0,1	<0,1	<0,2	2.83724	<0,3	<0,3	<2	<2	1.33332	<0,3	<0,3	<0,3	<0,3	<0,3	6.28113	16.6716	0.48
VI-M-1	2018	Paper industry	Lake Tyrifjorden			Roach	Rutilus rutilus	Liver	26.88	245.9		<0,5	<0,5	<0,5	<0,5	<0,4	3.83241	5.81767	6.32991	3.05094	4.12007	<0,4	<0,4	<0,1	<0,1	<0,1	<0,1	22.5389	0.71	<0,1	0.39	<0,2	2.51026	<0,3	<0,3	<2	<2	0.39668	<0,3	0.13409	<0,3	<0,3	<0,3	1.28671	6.86847	<0,3
VI-M-6	2018	Paper industry	Lake Tyrifjorden			Roach	Rutilus rutilus	Liver	26.6	225.64		<0,5	<0,5	<0,5	<0,5	<0,4	4.4385	6.48247	13.4829	4.45154	5.43117	<0,4	<0,4	<0,1	<0,1	<0,1	<0,1	37.6388	1.12	<0,1	0.27	<0,2	3.21119	<0,3	<0,3	<2	<2	0.43514	<0,3	0.1941	<0,3	<0,3	<0,3	2.07525	8.97245	<0,3
VI-M-11	2018	Paper industry	Lake Tyrifjorden			Roach	Rutilus rutilus	Liver	27.76	250.62		<0,5	<0,5	<0,5	<0,5	<0,4	5.94796	9.72956	19.3614	4.90257	8.35337	<0,4	<0,4	<0,1	<0,1	<0,1	<0,1	32.7285	0.55	<0,1	0.38	<0,2	5.66936	<0,3	<0,3	<2	<2	0.56427	<0,3	0.14082	<0,3	<0,3	<0,3	4.34267	16.2321	0.36
SØ-R-1	2018	Paper industry	Lake Tyrifjorden			Arctic char	Salvelinus alpinus	Liver	38	458.1		<0,5	<0,5	2.4	2.7	2.41629	25.1514	49.2728	45.282	14.5805	8.58642	1.1	<0,4	<0,1	<0,1	<0,1	<0,1	71.1364	0.93	<0,1	0.28	<0,2	9.33798	<0,3	<0,3	<2	<2	0.81648	<0,3	0.33472	<0,3	0.5	<0,3	0.17761	0.6863	<0,3
BR-S-1	2018	Paper industry	Lake Tyrifjorden			Whitefish	Coregonus lavaretus	Liver	34.72	195.717		<0,5	<0,5	<0,5	<0,5	3.02	18.58	15.04	10.2	9.73	1.69	<0,4	<0,4	<0,1	<0,1	<0,1	<0,1	650.5	22	0.29	<0,1	<0,2	12.9	<0,3	<0,3	<2	<2	<0,3	<0,3	0.47	<0,3	<0,3	<0,3	<0,3	0.59	<0,3
NF-S-1	2018	Paper industry	Lake Tyrifjorden			Whitefish	Coregonus lavaretus	Liver	34.6	365.5		<0,5	<0,5	<0,5	<0,5	<0,5	2.23835	1.6428	3.23791	1.79865	2.12783	<0,4	<0,4	<0,1	<0,1	<0,1	<0,1	34	1.25	<0,1	<0,1	<0,2	33.5	<0,3	<0,3	<2	<2	<0,3	<0,3	7.38086	<0,3	<0,3	<0,3	0.60148	3.50262	<0,3
NF-S-6	2018	Paper industry	Lake Tyrifjorden			Whitefish	Coregonus lavaretus	Liver	33.42	342.02		<0,5	<0,5	<0,5	<0,5	<0,5	3.66012	2.7134	6.87996	3.00461	4.6498	<0,4	<0,4	<0,1	<0,1	<0,1	<0,1	58	1.35	<0,1	<0,1	<0,2	55.1	<0,3	<0,3	<2	<2	0.30405	<0,3	4.63926	<0,3	<0,3	<0,3	0.5	8.58146	<0,3
NF-S-11	2018	Paper industry	Lake Tyrifjorden			Whitefish	Coregonus lavaretus	Liver	31.24	268.04		<0,5	<0,5	<0,5	<0,5	<0,5	4.8342	3.30044	7.65151	3.53116	5.21693	<0,4	<0,4	<0,1	<0,1	<0,1	<0,1	35	0.87	<0,1	<0,1	<0,2	45.6	<0,3	<0,3	<2	<2	<0,3	<0,3	2.54167	<0,3	<0,3	<0,3	<0,3	3.78009	<0,3
S-S-1	2018	Paper industry	Lake Tyrifjorden			Whitefish	Coregonus lavaretus	Liver	29.16	267.3		<0,5	<0,5	<0,5	<0,5	0.73	2.4	1.86	0.92	1.89	0.41	<0,4	<0,4	0.23	<0,1	<0,1	<0,1	30.3	0.61	<0,1	<0,1	<0,2	3.1	<0,3	<0,3	<2	<2	<0,3	<0,3	0.24	<0,3	<0,3	<0,3	<0,3	0.79	<0,3
S-S-2	2018	Paper industry	Lake Tyrifjorden			Whitefish	Coregonus lavaretus	Liver	29.32	242.06		<0,5	<0,5	<0,5	<0,5	0.79	2.32	1.67	0.6	0.45	<0,4	<0,4	<0,4	<0,1	<0,1	<0,1	<0,1	27.2	0.54	<0,1	<0,1	<0,2	2	<0,3	<0,3	<2	<2	<0,3	<0,3	0.33	<0,3	<0,3	<0,3	<0,3	0.6	<0,3
SF-S-1	2018	Paper industry	Lake Tyrifjorden			Whitefish	Coregonus lavaretus	Liver	32.3	306.7		<0,5	<0,5	<0,5	<0,5	<0,5	4.04003	3.46765	1.76406	0.88193	<0,4	<0,4	<0,4	<0,1	<0,1	<0,1	<0,1	32	0.26	<0,1	0.31	<0,2	3.53343	<0,3	<0,3	<2	<2	<0,3	<0,3	0.26193	<0,3	<0,3	3.53343	0.08701	0.81345	<0,3
SØ-S-1	2018	Paper industry	Lake Tyrifjorden			Whitefish	Coregonus lavaretus	Liver	34.7	380.86		<0,5	<0,5	<0,5	<0,5	<0,5	11.8703	8.91091	14.9118	4.31677	5.16302	<0,4	<0,4	<0,1	<0,1	<0,1	<0,1	99	0.77	<0,1	0.45	<0,2	49.4707	<0,3	<0,3	<2	<2	0.62999	<0,3	1.47097	<0,3	<0,3	49.4707	0.85582	7.82806	<0,3
SØ-S-6	2018	Paper industry	Lake Tyrifjorden			Whitefish	Coregonus lavaretus	Liver	32	297.775		<0,5	<0,5	<0,5	<0,5	8.6	28.8479	18.9355	25.3425	10.3531	6.69845	<0,4	<0,4	<0,1	<0,1	<0,1	<0,1	136	1.34	<0,1	<0,1	<0,2	33.1816	<0,3	<0,3	<2	<2	0.96083	<0,3	3.17273	<0,3	<0,3	33.1816	0.70841	5.05349	<0,3
SØ-S-10	2018	Paper industry	Lake Tyrifjorden			Whitefish	Coregonus lavaretus	Liver	31.4	267.933		<0,5	<0,5	<0,5	<0,5	4.28506	25.7243	18.037	38.3417	10.1146	11.3055	<0,4	<0,4	<0,1	<0,1	<0,1	<0,1	201.614	2.12	<0,1	<0,1	<0,2	66.1359	<0,3	<0,3	<2	<2	2.31238	<0,3	1.87551	<0,3	<0,3	<0,3	1.03018	24.3615	1.35
VI-S-1	2018	Paper industry	Lake Tyrifjorden			Whitefish	Coregonus lavaretus	Liver	31.3	262.44		<0,5	<0,5	<0,5	<0,5	1.5886	6.51177	4.9639	5.58699	2.74861	4.61241	<0,4	<0,4	<0,1	<0,1	<0,1	<0,1	37.3052	0.23	<0,1	<0,1	<0,2	6.33646	<0,3	<0,3	<2	<2	<0,3	<0,3	0.35799	<0,3	1.02	<0,3	0.18601	6.03209	0.43
VI-S-6	2018	Paper industry	Lake Tyrifjorden			Whitefish	Coregonus lavaretus	Liver	32.76	293.76		<0,5	<0,5	<0,5	<0,5	1.58341	6.37329	5.97593	8.7621	4.39662	9.14015	<0,4	<0,4	<0,1	<0,1	<0,1	<0,1	56.8418	0.36	<0,1	0.22	<0,2	6.96662	<0,3	<0,3	<2	<2	0.60774	<0,3	0.7952	<0,3	1.75	<0,3	0.42358	12.8329	0.99
VI-S-11	2018	Paper industry	Lake Tyrifjorden			Whitefish	Coregonus lavaretus	Liver	32.55	315.8		<0,5	<0,5	<0,5	<0,5	5.9553	20.0494	10.1967	10.4287	3.62185	6.83345	<0,4	<0,4	<0,1	<0,1	<0,1	<0,1	75.1298	0.58	<0,1	<0,1	<0,2	9.8671	<0,3	<0,3	<2	<2	<0,3	<0,3	0.77237	<0,3	2.42	<0,3	0.73841	13.8576	0.95
SØ-Ø-1	2018	Paper industry	Lake Tyrifjorden			Brown Trout	Salmo trutta	Liver	41.3	728.5		<0,5	0.8	2.5	2.9	3.02529	34.6816	90.5375	69.3867	26.7972	21.0374	2.9	<0,4	<0,1	<0,1	<0,1	0.17	101.283	1.29	<0,1	0.5	<0,2	11.9565	<0,3	<0,3	<2	<2	0.81302	<0,3	0.31588	<0,3	2.1	<0,3	0.21869	2.12755	<0,3
TYR-Ø-1	2018	Paper industry	Lake Tyrifjorden			Brown Trout	Salmo trutta	Liver	68.5	3110		<0,5	<0,5	<0,5	<0,5	2.56	65.1	130.8	65.95	43.2	40	2.59	<0,4	<0,1	<0,1	<0,1	<0,1	95.8	1.44	<0,1	0.87	<0,2	8.6	<0,3	<0,3	<2	<2	0.86	<0,3	<0,3	<0,3	<0,3	<0,3	<0,3	7.92	0.32
TYR-Ø-2	2018	Paper industry	Lake Tyrifjorden			Brown Trout	Salmo trutta	Liver	66.5	3790		<0,5	<0,5	<0,5	<0,5	1.51	28.22	31.53	28	9.1	5.68	0.51	<0,4	<0,1	<0,1	<0,1	<0,1	36.9	0.98	<0,1	<0,1	<0,2	5.8	<0,3	<0,3	<2	<2	0.66	<0,3	0.31	<0,3	<0,3	<0,3	<0,3	1.21	<0,3
TYR-Ø-3	2018	Paper industry	Lake Tyrifjorden			Brown Trout	Salmo trutta	Liver	52.5	1370		<0,5	<0,5	<0,5	<0,5	1.13	17.32	40.01	43.05	20	19.7	1.68	<0,4	<0,1	<0,1	<0,1	<0,1	35.6	0.7	<0,1	0.31	<0,2	11.3	<0,3	<0,3	<2	<2	0.67	<0,3	<0,3	<0,3	<0,3	<0,3	0.41	2.11	<0,3
TYR-Ø-4	2018	Paper industry	Lake Tyrifjorden			Brown Trout	Salmo trutta	Liver	61	2260		<0,5	<0,5	<0,5	<0,5	1.72	29.75	52.44	46.09	20.4	18.1	1.82	<0,4	<0,1	<0,1	<0,1	<0,1	44.7	1.07	<0,1	0.32	<0,2	9.7	<0,3	<0,3	<2	<2	0.39	<0,3	0.27	<0,3	<0,3	<0,3	<0,3	4.1	<0,3
TYR-Ø-5	2018	Paper industry	Lake Tyrifjorden			Brown Trout	Salmo trutta	Liver	52	1490		<0,5	<0,5	<0,5	1.67	0.88	8.72	8.66	9.74	19.9	1.76	<0,4	<0,4	<0,1	<0,1	<0,1	<0,1	10.8	0.55	<0,1	<0,1	<0,2	1.3	<0,3	<0,3	<2	<2	0.35	<0,3	0.34	<0,3	<0,3	<0,3	0.53	0.58	<0,3
BR-A-1	2018	Paper industry	Lake Tyrifjorden			Perch	Perca fluviatilis	Muscle	28.5	253.9		<0,5	<0,5	<0,5	<0,5	<0,4	1.32	1.55	2.38	0.87	0.61	<0,4	<0,4	<0,1	<0,1	<0,1	<0,1	11.3	0.17	<0,1	<0,1	<0,2	0.13	<0,3	<0,3	<2	<2	<0,3	<0,3	<0,3	<0,3	<0,3	<0,3	<0,3	1.37	<0,3
BR-A-2	2018	Paper industry	Lake Tyrifjorden			Perch	Perca fluviatilis	Muscle	32.5	525.1		<0,5	<0,5	<0,5	<0,5	<0,4	<0,4	0.98	1.64	0.85	0.82	<0,4	<0,4	<0,1	<0,1	<0,1	<0,1	9.49	0.28	<0,1	<0,1	<0,2	<0,1	<0,3	<0,3	<2	<2	<0,3	<0,3	<0,3	<0,3	<0,3	<0,3	0.83	5.76	<0,3
NF-A-1	2018	Paper industry	Lake Tyrifjorden			Perch	Perca fluviatilis	Muscle	24	177.8		<0,5	<0,5	<0,5	<0,5	<0,4	0.99373	1.46861	2.46892	1.33061	0.89961	<0,4	<0,4	<0,1	<0,1	<0,1	<0,1	6.34609	0.33	<0,1	<0,1	<0,2	0.61226	<0,3	<0,3	<2	<2	<0,3	<0,3	<0,3	<0,3	<0,3	<0,3	<0,3	0.33792	<0,3
NF-A-2	2018	Paper industry	Lake Tyrifjorden			Perch	Perca fluviatilis	Muscle	24.4	171.4		<0,5	<0,5	<0,5	<0,5	<0,4	0.5059	0.70186	0.59554	0.64781	0.50929	<0,4	<0,4	<0,1	<0,1	<0,1	<0,1	10.2	0.16	<0,1	<0,1	<0,2	0.04193	<0,3	<0,3	<2	<2	<0,3	<0,3	<0,3	<0,3	<0,3	<0,3	0.414	0.48326	<0,3
NF-A-3	2018	Paper industry	Lake Tyrifjorden			Perch	Perca fluviatilis	Muscle	27.4	204.4		<0,5	<0,5	<0,5	<0,5	<0,4	1.93352	2.5132	3.60875	1.91005	0.95039	<0,4	<0,4	<0,1	<0,1	<0,1	<0,1	8.11352	0.21	<0,1	<0,1	<0,2	0.11006	<0,3	<0,3	<2	<2	<0,3	<0,3	<0,3	<0,3	<0,3	<0,3	<0,3	0.23465	<0,3
NF-A-4	2018	Paper industry	Lake Tyrifjorden			Perch	Perca fluviatilis	Muscle	26.1	217.2		<0,5	<0,5	<0,5	<0,5	<0,4	0.79508	1.10151	0.90799	0.74762	0.35131	<0,4	<0,4	<0,1	<0,1	<0,1	<0,1	5.17905	0.2	<0,1	<0,1	<0,2	0.95728	<0,3	<0,3	<2	<2	<0,3	<0,3	<0,3	<0,3	<0,3	<0,3	<0,3	0.33639	<0,3
NF-A-5	2018	Paper industry	Lake Tyrifjorden			Perch	Perca fluviatilis	Muscle	22.5	139.9		<0,5	<0,5	4.24	2.64	0.60091	0.45301	0.4218	0.34927	0.36474	0.30628	<0,4	<0,4	<0,1	<0,1	<0,1	<0,1	4.71334	0.13	<0,1	<0,1	<0,2	0.25029	<0,3	<0,3	<2	<2	<0,3	<0,3	0.49162	<0,3	<0,3	<0,3	<0,3	0.31883	<0,3
NF-A-6	2018	Paper industry	Lake Tyrifjorden			Perch	Perca fluviatilis	Muscle	26.2	199.5		<0,5	<0,5	<0,5	<0,5	<0,4	0.61	0.8	1.13	0.51	<0,4	<0,4	<0,4	<0,1	<0,1	<0,1	<0,1	4.33	0.23	<0,1	<0,1	<0,2	0.11	<0,3	<0,3	<2	<2	<0,3	<0,3	<0,3	<0,3	<0,3	<0,3	<0,3	1.37	<0,3
NF-A-7	2018	Paper industry	Lake Tyrifjorden			Perch	Perca fluviatilis	Muscle	26.7	197.3		<0,5	<0,5	<0,5	<0,5	<0,4	4.41	4.29	5.46	1.81	1.07	<0,4	<0,4	<0,1	<0,1	<0,1	<0,1	29.4	0.26	<0,1	<0,1	<0,2	1.07	<0,3	<0,3	<2	<2	<0,3	<0,3	<0,3	<0,3	<0,3	<0,3	<0,3	2.82	<0,3
NF-A-8	2018	Paper industry	Lake Tyrifjorden			Perch	Perca fluviatilis	Muscle	28.3	274.6		<0,5	<0,5	<0,5	<0,5	<0,4	0.51	0.92	1.46	0.69	0.45	<0,4	<0,4	<0,1	<0,1	<0,1	<0,1	25.6	1.37	<0,1	<0,1	<0,2	0.73	<0,3	<0,3	<2	<2	<0,3	<0,3	0.68	<0,3	<0,3	<0,3	<0,3	1.61	<0,3
NF-A-9	2018	Paper industry	Lake Tyrifjorden			Perch	Perca fluviatilis	Muscle	26.1	184.5		<0,5	<0,5	<0,5	<0,5	<0,4	<0,4	0.59	0.89	0.43	<0,4	<0,4	<0,4	<0,1	<0,1	<0,1	<0,1	6.68	0.57	<0,1	<0,1	<0,2	0.91	<0,3	<0,3	<2	<2	<0,3	<0,3	<0,3	<0,3	<0,3	<0,3	<0,3	1.46	<0,3
NF-A-10	2018	Paper industry	Lake Tyrifjorden			Perch	Perca fluviatilis	Muscle	27.9	254.4		<0,5	<0,5	<0,5	<0,5	<0,4	0.95	1.1	2.09	0.89	0.56	<0,4	<0,4	<0,1	<0,1	<0,1	<0,1	13.4	0.94	<0,1	<0,1	<0,2	0.32	<0,3	<0,3	<2	<2	<0,3	<0,3	<0,3	<0,3	<0,3	<0,3	<0,3	2.73	<0,3
SF-A-1	2018	Paper industry	Lake Tyrifjorden			Perch	Perca fluviatilis	Muscle	31.7	321.7		<0,5	<0,5	<0,5	<0,5	<0,4	1.25674	0.79132	0.53948	<0,4	<0,4	<0,4	<0,4	<0,1	<0,1	<0,1	<0,1	9.9	<0,1	<0,1	<0,1	<0,2	<0,1	<0,3	<0,3	<2	<2	<0,3	<0,3	<0,3	<0,3	<0,3	<0,3	<0,3	<0,3	<0,3
SF-A-2	2018	Paper industry	Lake Tyrifjorden			Perch	Perca fluviatilis	Muscle	26.5	195.2		<0,5	<0,5	<0,5	<0,5	<0,4	1.50002	0.86352	0.39819	<0,4	<0,4	<0,4	<0,4	<0,1	<0,1	<0,1	<0,1	13.5	0.11	<0,1	<0,1	<0,2	<0,1	<0,3	<0,3	<2	<2	<0,3	<0,3	<0,3	<0,3	<0,3	<0,3	<0,3	<0,3	<0,3
SF-A-3	2018	Paper industry	Lake Tyrifjorden			Perch	Perca fluviatilis	Muscle	31	319.7		<0,5	<0,5	<0,5	<0,5	<0,4	0.97881	0.77945	0.37886	<0,4	<0,4	<0,4	<0,4	<0,1	<0,1	<0,1	<0,1	8.5	<0,1	<0,1	<0,1	<0,2	<0,1	<0,3	<0,3	<2	<2	<0,3	<0,3	<0,3	<0,3	<0,3	<0,3	<0,3	<0,3	<0,3
SF-A-4	2018	Paper industry	Lake Tyrifjorden			Perch	Perca fluviatilis	Muscle	30.5	326.3		<0,5	<0,5	<0,5	<0,5	<0,4	1.24203	1.07716	0.54882	0.56688	<0,4	<0,4	<0,4	<0,1	<0,1	<0,1	<0,1	9.2	<0,1	<0,1	<0,1	<0,2	<0,1	<0,3	<0,3	<2	<2	<0,3	<0,3	<0,3	<0,3	<0,3	<0,3	<0,3	<0,3	<0,3
SF-A-5	2018	Paper industry	Lake Tyrifjorden			Perch	Perca fluviatilis	Muscle	31.5	345		<0,5	<0,5	<0,5	<0,5	<0,4	0.84139	0.68917	<0,4	<0,4	<0,4	<0,4	<0,4	<0,1	<0,1	<0,1	<0,1	7.9	<0,1	<0,1	<0,1	<0,2	<0,1	<0,3	<0,3	<2	<2	<0,3	<0,3	<0,3	<0,3	<0,3	<0,3	<0,3	<0,3	<0,3
SF-A-6	2018	Paper industry	Lake Tyrifjorden			Perch	Perca fluviatilis	Muscle	31.2	314.3		<0,5	<0,5	<0,5	1.53	<0,4	0.82874	0.64962	<0,4	<0,4	<0,4	<0,4	<0,4	<0,1	<0,1	<0,1	<0,1	6.5	<0,1	<0,1	<0,1	<0,2	<0,1	<0,3	<0,3	<2	<2	<0,3	<0,3	<0,3	<0,3	<0,3	<0,3	<0,3	<0,3	<0,3
SF-A-7	2018	Paper industry	Lake Tyrifjorden			Perch	Perca fluviatilis	Muscle	28.7	259.3		<0,5	<0,5	<0,5	<0,5	<0,4	0.95739	0.7067	<0,4	<0,4	<0,4	<0,4	<0,4	<0,1	<0,1	<0,1	<0,1	7.2	<0,1	<0,1	<0,1	<0,2	<0,1	<0,3	<0,3	<2	<2	<0,3	<0,3	<0,3	<0,3	<0,3	<0,3	<0,3	<0,3	<0,3
SF-A-8	2018	Paper industry	Lake Tyrifjorden			Perch	Perca fluviatilis	Muscle	35.2	435.7		<0,5	<0,5	<0,5	<0,5	<0,4	1.63512	1.24458	0.79687	0.47989	<0,4	<0,4	<0,4	<0,1	<0,1	<0,1	<0,1	10.9	<0,1	<0,1	<0,1	<0,2	<0,1	<0,3	<0,3	<2	<2	<0,3	<0,3	<0,3	<0,3	<0,3	<0,3	<0,3	<0,3	<0,3
SF-A-9	2018	Paper industry	Lake Tyrifjorden			Perch	Perca fluviatilis	Muscle	29.8	313.7		<0,5	<0,5	<0,5	<0,5	<0,4	1.08951	1.0938	0.63537	<0,4	<0,4	<0,4	<0,4	<0,1	<0,1	<0,1	<0,1	20.8	0.15	<0,1	<0,1	<0,2	<0,1	<0,3	<0,3	<2	<2	<0,3	<0,3	<0,3	<0,3	<0,3	<0,3	<0,3	<0,3	<0,3
SF-A-10	2018	Paper industry	Lake Tyrifjorden			Perch	Perca fluviatilis	Muscle	28.4	278.2		<0,5	<0,5	<0,5	<0,5	<0,4	0.92301	0.51626	<0,4	<0,4	<0,4	<0,4	<0,4	<0,1	<0,1	<0,1	<0,1	10.1	<0,1	<0,1	<0,1	<0,2	<0,1	<0,3	<0,3	<2	<2	<0,3	<0,3	<0,3	<0,3	<0,3	<0,3	<0,3	<0,3	<0,3
SØ-A-1	2018	Paper industry	Lake Tyrifjorden			Perch	Perca fluviatilis	Muscle	28.3	261		<0,5	<0,5	<0,5	<0,5	0.73757	9.7311	15.45	33.482	22.5925	10.7388	<0,4	<0,4	<0,1	<0,1	<0,1	<0,1	38.1	0.34	<0,1	<0,1	<0,2	2.62855	<0,3	<0,3	<2	<2	<0,3	<0,3	<0,3	<0,3	<0,3	<0,3	0.3454	0.7362	<0,3
SØ-A-2	2018	Paper industry	Lake Tyrifjorden			Perch	Perca fluviatilis	Muscle	30.2	345.7		<0,5	<0,5	<0,5	<0,5	<0,4	0.90274	1.60791	2.95789	1.79828	0.96466	<0,4	<0,4	<0,1	<0,1	<0,1	<0,1	6.59578	0.21	<0,1	<0,1	<0,2	<0,1	<0,3	<0,3	<2	<2	<0,3	<0,3	<0,3	<0,3	<0,3	<0,3	0.53447	<0,3	<0,3
SØ-A-3	2018	Paper industry	Lake Tyrifjorden			Perch	Perca fluviatilis	Muscle	28.1	251.4		<0,5	<0,5	<0,5	<0,5	<0,4	1.35928	1.95786	3.0891	1.90665	1.15255	<0,4	<0,4	<0,1	<0,1	<0,1	<0,1	11.8	0.14	<0,1	<0,1	<0,2	0.20383	<0,3	<0,3	<2	<2	<0,3	<0,3	<0,3	<0,3	<0,3	<0,3	<0,3	<0,3	<0,3
SØ-A-4	2018	Paper industry	Lake Tyrifjorden			Perch	Perca fluviatilis	Muscle	26.7	264		<0,5	<0,5	2.52	1.51	0.63266	1.88351	2.56157	4.21117	1.91626	0.90344	<0,4	<0,4	<0,1	<0,1	<0,1	<0,1	12.6	0.16	<0,1	<0,1	<0,2	0.2716	<0,3	<0,3	<2	<2	<0,3	<0,3	<0,3	<0,3	<0,3	<0,3	<0,3	<0,3	<0,3
SØ-A-5	2018	Paper industry	Lake Tyrifjorden			Perch	Perca fluviatilis	Muscle	26.2	219.6		<0,5	<0,5	<0,5	<0,5	0.4138	2.10442	2.88433	4.57396	2.32303	1.03159	<0,4	<0,4	<0,1	<0,1	<0,1	<0,1	7.98324	0.13	<0,1	<0,1	<0,2	0.28363	<0,3	<0,3	<2	<2	<0,3	<0,3	<0,3	<0,3	<0,3	<0,3	<0,3	<0,3	<0,3
SØ-A-6	2018	Paper industry	Lake Tyrifjorden			Perch	Perca fluviatilis	Muscle	29.3	296.8		<0,5	<0,5	<0,5	<0,5	<0,4	1.90232	1.312	0.69901	0.4155	0.01827	<0,4	<0,4	<0,1	<0,1	<0,1	<0,1	4.65434	<0,1	<0,1	<0,1	<0,2	0.21074	<0,3	<0,3	<2	<2	<0,3	<0,3	<0,3	<0,3	1.22	<0,3	<0,3	<0,3	<0,3
SØ-A-7	2018	Paper industry	Lake Tyrifjorden			Perch	Perca fluviatilis	Muscle	26.7	234.8		<0,5	<0,5	<0,5	<0,5	0.5487	6.74787	3.49048	5.4266	2.43389	1.10882	<0,4	<0,4	<0,1	<0,1	<0,1	<0,1	15.5869	0.13	<0,1	<0,1	<0,2	0.20661	<0,3	<0,3	<2	<2	<0,3	<0,3	<0,3	<0,3	0.41	<0,3	0.49914	1.83153	<0,3
SØ-A-8	2018	Paper industry	Lake Tyrifjorden			Perch	Perca fluviatilis	Muscle	28.5	251.8		<0,5	<0,5	<0,5	<0,5	<0,4	1.06459	1.27615	1.50237	1.21565	0.60477	<0,4	<0,4	<0,1	<0,1	<0,1	<0,1	5.28501	<0,1	<0,1	<0,1	<0,2	0.09646	<0,3	<0,3	<2	<2	<0,3	<0,3	<0,3	<0,3	0.71	<0,3	<0,3	0.65991	<0,3
SØ-A-9	2018	Paper industry	Lake Tyrifjorden			Perch	Perca fluviatilis	Muscle	29.6	277.4		<0,5	<0,5	<0,5	<0,5	<0,4	2.81041	1.71138	0.97059	0.65676	<0,4	<0,4	<0,4	<0,1	<0,1	<0,1	<0,1	5.23374	<0,1	<0,1	<0,1	<0,2	0.12452	<0,3	<0,3	<2	<2	<0,3	<0,3	<0,3	<0,3	0.76	<0,3	<0,3	0.41037	<0,3
SØ-A-10	2018	Paper industry	Lake Tyrifjorden			Perch	Perca fluviatilis	Muscle	30.1	308.4		<0,5	<0,5	<0,5	<0,5	<0,4	1.58448	1.8105	1.62095	1.4161	0.88994	<0,4	<0,4	<0,1	<0,1	<0,1	<0,1	6.26635	<0,1	<0,1	<0,1	<0,2	0.05127	<0,3	<0,3	<2	<2	<0,3	<0,3	<0,3	<0,3	<0,3	<0,3	<0,3	1.01567	<0,3
VI-A-1	2018	Paper industry	Lake Tyrifjorden			Perch	Perca fluviatilis	Muscle	29.2	281.3		<0,5	<0,5	<0,5	<0,5	<0,4	0.88695	0.73249	0.96654	0.68312	0.35873	<0,4	<0,4	<0,1	<0,1	<0,1	<0,1	4.92	<0,1	<0,1	<0,1	<0,2	<0,1	<0,3	<0,3	<2	<2	<0,3	<0,3	<0,3	<0,3	<0,3	<0,3	<0,3	0.69157	<0,3
VI-A-2	2018	Paper industry	Lake Tyrifjorden			Perch	Perca fluviatilis	Muscle	27.1	228.2		<0,5	<0,5	<0,5	<0,5	<0,4	1.76548	2.99067	4.74318	2.7948	1.16949	<0,4	<0,4	<0,1	<0,1	<0,1	<0,1	8.71	<0,1	<0,1	<0,1	<0,2	<0,1	<0,3	<0,3	<2	<2	<0,3	<0,3	<0,3	<0,3	<0,3	<0,3	<0,3	1.24647	<0,3
VI-A-3	2018	Paper industry	Lake Tyrifjorden			Perch	Perca fluviatilis	Muscle	26.5	199.5		<0,5	<0,5	<0,5	<0,5	<0,4	0.73623	0.72569	0.78039	0.73795	0.74812	<0,4	<0,4	<0,1	<0,1	<0,1	<0,1	3.21	<0,1	<0,1	<0,1	<0,2	<0,1	<0,3	<0,3	<2	<2	<0,3	<0,3	<0,3	<0,3	<0,3	<0,3	<0,3	0.9737	<0,3
VI-A-4	2018	Paper industry	Lake Tyrifjorden			Perch	Perca fluviatilis	Muscle	25.6	196.6		<0,5	<0,5	<0,5	<0,5	<0,4	1.00061	0.90054	1.08525	0.67905	<0,4	<0,4	<0,4	<0,1	<0,1	<0,1	<0,1	8.42	<0,1	<0,1	<0,1	<0,2	<0,1	<0,3	<0,3	<2	<2	<0,3	<0,3	<0,3	<0,3	<0,3	<0,3	<0,3	0.59382	<0,3
VI-A-5	2018	Paper industry	Lake Tyrifjorden			Perch	Perca fluviatilis	Muscle	25.2	176.3		<0,5	<0,5	<0,5	<0,5	<0,4	1.09952	1.08361	0.89276	0.49263	0.32142	<0,4	<0,4	<0,1	<0,1	<0,1	<0,1	10.1	<0,1	<0,1	<0,1	<0,2	<0,1	<0,3	<0,3	<2	<2	<0,3	<0,3	<0,3	<0,3	<0,3	<0,3	<0,3	1.22547	<0,3
VU-A-1	2018	Paper industry	Lake Tyrifjorden			Perch	Perca fluviatilis	Muscle	25.2	191.8		<0,5	<0,5	<0,5	<0,5	<0,4	1.05581	0.61501	1.09109	0.73082	0.67185	<0,4	<0,4	<0,1	<0,1	<0,1	<0,1	9.97343	0.19	<0,1	<0,1	<0,2	1.84981	<0,3	<0,3	<2	<2	<0,3	<0,3	0.34351	<0,3	<0,3	<0,3	1.60693	0.4368	<0,3
VU-A-2	2018	Paper industry	Lake Tyrifjorden			Perch	Perca fluviatilis	Muscle	24.1	185.3		<0,5	<0,5	<0,5	<0,5	<0,4	1.93621	1.08596	2.66685	0.93268	0.8058	<0,4	<0,4	<0,1	<0,1	<0,1	<0,1	37.5	2.36	<0,1	<0,1	<0,2	3.40464	<0,3	<0,3	<2	<2	<0,3	<0,3	4.51055	<0,3	<0,3	<0,3	1.78615	1.04426	<0,3
VU-A-3	2018	Paper industry	Lake Tyrifjorden			Perch	Perca fluviatilis	Muscle	27.2	259.7		<0,5	<0,5	1.52	3.1	<0,4	1.09443	1.03322	5.33813	1.17017	2.64981	<0,4	<0,4	<0,1	<0,1	<0,1	<0,1	12.3	1.5	<0,1	<0,1	<0,2	23.9177	<0,3	<0,3	<2	<2	<0,3	<0,3	3.85186	<0,3	<0,3	<0,3	1.85589	1.3135	<0,3
VU-A-4	2018	Paper industry	Lake Tyrifjorden			Perch	Perca fluviatilis	Muscle	28.5	325.1		<0,5	<0,5	0.73	0.85	0.57833	2.75292	1.978	2.27935	1.02875	0.6202	<0,4	<0,4	<0,1	<0,1	<0,1	<0,1	28.6	1.49	<0,1	<0,1	<0,2	0.32469	<0,3	<0,3	<2	<2	<0,3	<0,3	0.52422	<0,3	<0,3	0.67693	1.67398	0.50075	<0,3
VU-A-5	2018	Paper industry	Lake Tyrifjorden			Perch	Perca fluviatilis	Muscle	27	209.9		<0,5	<0,5	0.52	<0,5	<0,4	3.28849	1.32242	3.25132	0.92094	1.12968	<0,4	<0,4	<0,1	<0,1	<0,1	<0,1	37.6	2.27	<0,1	<0,1	<0,2	0.09676	<0,3	<0,3	<2	<2	<0,3	<0,3	0.9744	<0,3	<0,3	0.67382	2.81974	0.64786	<0,3
NF-G-1	2018	Paper industry	Lake Tyrifjorden			Pike	Esox lucius	Muscle	56.1	1028		<0,5	<0,5	<0,5	<0,5	<0,4	0.51	1.18	2.52	1.19	0.67	<0,4	<0,4	<0,1	<0,1	<0,1	<0,1	1.61	<0,1	<0,1	<0,1	<0,2	3.96	<0,3	<0,3	<2	<2	<0,3	<0,3	<0,3	<0,3	<0,3	<0,3	<0,3	<0,3	<0,3
NF-G-2	2018	Paper industry	Lake Tyrifjorden			Pike	Esox lucius	Muscle	46.9	581		<0,5	<0,5	<0,5	<0,5	<0,4	0.65963	0.744	1.02421	0.80107	0.22971	<0,4	<0,4	<0,1	<0,1	<0,1	<0,1	3.26836	<0,1	<0,1	<0,1	<0,2	2.95718	<0,3	<0,3	<2	<2	<0,3	<0,3	<0,3	<0,3	<0,3	<0,3	<0,3	<0,3	<0,3
SF-G-1	2018	Paper industry	Lake Tyrifjorden			Pike	Esox lucius	Muscle	49.2	701.7		<0,5	<0,5	2.31	1.33	0.55404	0.50853	0.48504	0.52574	<0,4	<0,4	<0,4	<0,4	<0,1	<0,1	<0,1	<0,1	3.71531	<0,1	<0,1	<0,1	<0,2	0.40703	<0,3	<0,3	<2	<2	<0,3	<0,3	<0,3	<0,3	<0,3	<0,3	<0,3	<0,3	<0,3
SF-G-2	2018	Paper industry	Lake Tyrifjorden			Pike	Esox lucius	Muscle	57.7	1188		<0,5	<0,5	<0,5	1.01	0.45867	0.51762	0.45143	<0,4	<0,4	<0,4	<0,4	<0,4	<0,1	<0,1	<0,1	<0,1	2.5406	<0,1	<0,1	<0,1	<0,2	0.28304	<0,3	<0,3	<2	<2	<0,3	<0,3	<0,3	<0,3	<0,3	<0,3	0.37536	<0,3	<0,3
SF-G-3	2018	Paper industry	Lake Tyrifjorden			Pike	Esox lucius	Muscle	50.3	690.3		<0,5	<0,5	<0,5	<0,5	<0,4	0.65952	0.67627	0.50853	0.42541	<0,4	<0,4	<0,4	<0,1	<0,1	<0,1	<0,1	4.08508	<0,1	<0,1	<0,1	<0,2	0.44424	<0,3	<0,3	<2	<2	<0,3	<0,3	<0,3	<0,3	<0,3	<0,3	<0,3	<0,3	<0,3
SF-G-4	2018	Paper industry	Lake Tyrifjorden			Pike	Esox lucius	Muscle	43.5	501.3		<0,5	<0,5	<0,5	<0,5	<0,4	0.47076	0.41421	<0,4	<0,4	<0,4	<0,4	<0,4	<0,1	<0,1	<0,1	<0,1	3.3717	<0,1	<0,1	<0,1	<0,2	0.56804	<0,3	<0,3	<2	<2	<0,3	<0,3	<0,3	<0,3	<0,3	<0,3	<0,3	<0,3	<0,3
SF-G-5	2018	Paper industry	Lake Tyrifjorden			Pike	Esox lucius	Muscle	51.4	816.1		<0,5	<0,5	<0,5	<0,5	<0,4	0.68991	0.44853	<0,4	<0,4	<0,4	<0,4	<0,4	<0,1	<0,1	<0,1	<0,1	2.84191	<0,1	<0,1	<0,1	<0,2	0.31367	<0,3	<0,3	<2	<2	<0,3	<0,3	<0,3	<0,3	<0,3	<0,3	<0,3	<0,3	<0,3
SØ-G-1	2018	Paper industry	Lake Tyrifjorden			Pike	Esox lucius	Muscle	50.5	772.1		<0,5	<0,5	<0,5	<0,5	<0,4	<0,4	0.59	0.99	<0,4	<0,4	<0,4	<0,4	<0,1	<0,1	<0,1	<0,1	2.96	<0,1	<0,1	<0,1	<0,2	0.42	<0,3	<0,3	<2	<2	<0,3	<0,3	<0,3	<0,3	<0,3	<0,3	<0,3	0.56	<0,3
SØ-G-2	2018	Paper industry	Lake Tyrifjorden			Pike	Esox lucius	Muscle	56.2	1027		<0,5	<0,5	<0,5	<0,5	<0,4	<0,4	<0,4	0.85	<0,4	<0,4	<0,4	<0,4	<0,1	<0,1	<0,1	<0,1	1.11	<0,1	<0,1	<0,1	<0,2	1.02	<0,3	<0,3	<2	<2	<0,3	<0,3	<0,3	<0,3	<0,3	<0,3	<0,3	<0,3	<0,3
SØ-G-3	2018	Paper industry	Lake Tyrifjorden			Pike	Esox lucius	Muscle	59.9	1624		<0,5	<0,5	<0,5	<0,5	<0,4	0.55	0.75	1.19	<0,4	0.41	<0,4	<0,4	<0,1	<0,1	<0,1	<0,1	6.06	<0,1	<0,1	<0,1	<0,2	0.56	<0,3	<0,3	<2	<2	<0,3	<0,3	<0,3	<0,3	<0,3	<0,3	<0,3	0.74	<0,3
VU-G-1	2018	Paper industry	Lake Tyrifjorden			Pike	Esox lucius	Muscle	34.8	232.8		<0,5	<0,5	<0,5	<0,5	<0,4	1.22754	0.41382	0.79039	0.22159	<0,4	<0,4	<0,4	<0,1	<0,1	<0,1	<0,1	6.7	<0,1	<0,1	<0,1	<0,2	11.3	<0,3	<0,3	<2	<2	<0,3	<0,3	0.26429	<0,3	<0,3	0.31357	0.54783	<0,3	<0,3
VU-G-2	2018	Paper industry	Lake Tyrifjorden			Pike	Esox lucius	Muscle	46.9	691.6		<0,5	<0,5	<0,5	<0,5	<0,4	0.06902	<0,4	0.73428	0.08185	<0,4	<0,4	<0,4	<0,1	<0,1	<0,1	<0,1	1.53	<0,1	<0,1	<0,1	<0,2	13.1	<0,3	<0,3	<2	<2	<0,3	<0,3	0.36592	<0,3	<0,3	0.07678	0.17868	<0,3	<0,3
VU-G-3	2018	Paper industry	Lake Tyrifjorden			Pike	Esox lucius	Muscle	90.5	4965		<0,5	<0,5	<0,5	<0,5	<0,4	0.82	0.67	0.71	<0,4	<0,4	<0,4	<0,4	<0,1	<0,1	<0,1	<0,1	13.4	0.17	<0,1	<0,1	<0,2	9.6	<0,3	<0,3	<2	<2	<0,3	<0,3	0.45	<0,3	<0,3	<0,3	<0,3	<0,3	<0,3
VU-G-4	2018	Paper industry	Lake Tyrifjorden			Pike	Esox lucius	Muscle	49.9	572.1		<0,5	<0,5	<0,5	<0,5	<0,4	<0,4	<0,4	<0,4	<0,4	<0,4	<0,4	<0,4	<0,1	<0,1	<0,1	<0,1	1.25226	<0,1	<0,1	<0,1	<0,2	30.4	<0,3	<0,3	<2	<2	<0,3	<0,3	0.41685	<0,3	<0,3	0.12158	0.33797	<0,3	<0,3
SØ-R-1	2018	Paper industry	Lake Tyrifjorden			Arctic char	Salvelinus alpinus	Muscle	41.3	728.5		<0,5	<0,5	<0,5	<0,5	<0,4	1.73028	2.80245	4.75817	2.51466	0.79634	<0,4	<0,4	<0,1	<0,1	<0,1	<0,1	3.38115	<0,1	<0,1	<0,1	<0,2	0.50164	<0,3	<0,3	<2	<2	<0,3	<0,3	<0,3	<0,3	<0,3	<0,3	<0,3	<0,3	<0,3
SØ-Ø-1	2018	Paper industry	Lake Tyrifjorden			Brown Trout	Salmo trutta	Muscle	38	458.1		<0,5	<0,5	<0,5	<0,5	0.51983	1.9532	3.16279	6.46707	3.73196	1.70477	<0,4	<0,4	<0,1	<0,1	<0,1	<0,1	4.47086	<0,1	<0,1	<0,1	<0,2	0.3782	<0,3	<0,3	<2	<2	<0,3	<0,3	<0,3	<0,3	<0,3	<0,3	<0,3	<0,3	<0,3
TYR-Ø-1	2018	Paper industry	Lake Tyrifjorden			Brown Trout	Salmo trutta	Muscle	68.5	3110		<0,5	<0,5	<0,5	<0,5	<0,4	2.01	4.28	8.06	3.73	2.91	<0,4	<0,4	<0,1	<0,1	<0,1	<0,1	6.96	<0,1	<0,1	<0,1	<0,2	0.17	<0,3	<0,3	<2	<2	<0,3	<0,3	<0,3	<0,3	<0,3	<0,3	<0,3	0.93	<0,3
TYR-Ø-2	2018	Paper industry	Lake Tyrifjorden			Brown Trout	Salmo trutta	Muscle	66.5	3790		<0,5	<0,5	<0,5	<0,5	<0,4	0.93	1.1	1.43	0.51	<0,4	<0,4	<0,4	<0,1	<0,1	<0,1	<0,1	2.15	<0,1	<0,1	<0,1	<0,2	0.35	<0,3	<0,3	<2	<2	<0,3	<0,3	<0,3	<0,3	<0,3	<0,3	<0,3	<0,3	<0,3
TYR-Ø-3	2018	Paper industry	Lake Tyrifjorden			Brown Trout	Salmo trutta	Muscle	52.5	1370		<0,5	<0,5	<0,5	<0,5	<0,4	0.8	1.45	3.19	1.58	1.31	<0,4	<0,4	<0,1	<0,1	<0,1	<0,1	2.38	<0,1	<0,1	<0,1	<0,2	0.18	<0,3	<0,3	<2	<2	<0,3	<0,3	<0,3	<0,3	<0,3	<0,3	<0,3	<0,3	<0,3
TYR-Ø-4	2018	Paper industry	Lake Tyrifjorden			Brown Trout	Salmo trutta	Muscle	61	2260		<0,5	<0,5	<0,5	<0,5	<0,4	0.79	1.2	2.47	0.92	0.64	<0,4	<0,4	<0,1	<0,1	<0,1	<0,1	1.94	<0,1	<0,1	<0,1	<0,2	0.29	<0,3	<0,3	<2	<2	<0,3	<0,3	<0,3	<0,3	<0,3	<0,3	<0,3	<0,3	<0,3
TYR-Ø-5	2018	Paper industry	Lake Tyrifjorden			Brown Trout	Salmo trutta	Muscle	52	1490		<0,5	<0,5	<0,5	<0,5	<0,4	<0,4	<0,4	<0,4	<0,4	<0,4	<0,4	<0,4	<0,1	<0,1	<0,1	<0,1	0.55	<0,1	<0,1	<0,1	<0,2	<0,1	<0,3	<0,3	<2	<2	<0,3	<0,3	<0,3	<0,3	<0,3	<0,3	<0,3	<0,3	<0,3
K01-Ø-M	2018	AFFF	Fagernes airport			Brown Trout	Salmo trutta	Muscle	38.5	409	<0,0478	<0,0478	<0,0478	<0,0478	<0,0478	<0,0478	0.0759	<0,0478	<0,0478	<0,0478	<0,0478			<0,0718		0.0846	<0,0718	26.2			<0,0718		1.17								<0,0957	<0,0718	<0,0957				<0,0957	<0,0957
K02-Ø-M	2018	AFFF	Fagernes airport			Brown Trout	Salmo trutta	Muscle	37	456	<0,0506	<0,0506	<0,0506	<0,0506	<0,0506	<0,0506	0.0605	<0,0506	<0,0506	<0,0506	<0,0506			<0,0759		0.0839	<0,0759	18.9			<0,0759		1.31								<0,101	<0,0759	<0,101				<0,101	<0,101
K03-Ø-M	2018	AFFF	Fagernes airport			Brown Trout	Salmo trutta	Muscle	39	502	<0,0493	<0,0493	<0,0493	<0,0493	<0,0493	<0,0493	0.0596	<0,0493	<0,0493	<0,0493	<0,0493			<0,0739		0.201	<0,0739	39.4			<0,0739		1.74								<0,0986	<0,0739	<0,0986				<0,0986	<0,0986
K04-Ø-M	2018	AFFF	Fagernes airport			Brown Trout	Salmo trutta	Muscle	32.5	342	<0,0476	<0,0476	<0,0476	<0,0476	<0,0476	<0,0476	0.0594	<0,0476	<0,0476	<0,0476	<0,0476			<0,0714		0.0751	<0,0714	28			<0,0714		1.04								<0,0952	<0,0714	<0,0952				<0,0952	<0,0952
K05-Ø-M	2018	AFFF	Fagernes airport			Brown Trout	Salmo trutta	Muscle	36	447	<0,0471	<0,0471	<0,0471	<0,0471	<0,0471	<0,0471	0.117	0.0545	<0,0471	<0,0471	<0,0471			<0,0707		0.235	<0,0707	47.4			<0,0707		2.31								<0,0943	<0,0707	<0,0943				<0,0943	<0,0943
K06-Ø-M	2018	AFFF	Fagernes airport			Brown Trout	Salmo trutta	Muscle	34.5	419	<0,0484	<0,0484	<0,0484	<0,0484	<0,0484	<0,0484	<0,0484	<0,0484	<0,0484	<0,0484	<0,0484			<0,0727		<0,0727	<0,0727	13.2			<0,0727		0.485								<0,0969	<0,0727	<0,0969				<0,0969	<0,0969
K07-Ø-M	2018	AFFF	Fagernes airport			Brown Trout	Salmo trutta	Muscle	34	337	<0,0491	<0,0491	<0,0491	<0,0491	<0,0491	<0,0491	<0,0491	<0,0491	<0,0491	<0,0491	<0,0491			<0,0736		<0,0736	<0,0736	5.63			<0,0736		0.877								<0,0981	<0,0736	<0,0981				<0,0981	<0,0981
K08-Ø-M	2018	AFFF	Fagernes airport			Brown Trout	Salmo trutta	Muscle	30.5	255	<0,0472	<0,0472	<0,0472	<0,0472	<0,0472	<0,0472	0.0528	<0,0472	<0,0472	<0,0472	<0,0472			<0,0708		<0,0708	<0,0708	19.5			<0,0708		1.33								<0,0944	<0,0708	<0,0944				<0,0944	<0,0944
K09-Ø-M	2018	AFFF	Fagernes airport			Brown Trout	Salmo trutta	Muscle	35.5	378	<0,0477	<0,0477	<0,0477	<0,0477	<0,0477	<0,0477	0.0534	<0,0477	<0,0477	<0,0477	<0,0477			<0,0716		<0,0716	<0,0716	11.2			<0,0716		0.4								<0,0955	<0,0716	<0,0955				<0,0955	<0,0955
K10-Ø-M	2018	AFFF	Fagernes airport			Brown Trout	Salmo trutta	Muscle	34.5	399	<0,0479	<0,0479	<0,0479	<0,0479	<0,0479	<0,0479	0.0852	0.0786	<0,0479	<0,0479	<0,0479			<0,0718		0.0791	<0,0718	23			<0,0718		0.42								<0,0957	<0,0718	<0,0957				<0,0957	<0,0957
K11-Ø-M	2018	AFFF	Fagernes airport			Brown Trout	Salmo trutta	Muscle	32	263	<0,0479	<0,0479	<0,0479	<0,0479	<0,0479	<0,0479	0.0518	<0,0479	<0,0479	<0,0479	<0,0479			<0,0718		<0,0718	<0,0718	17.5			<0,0718		1.55								<0,0958	<0,0718	<0,0958				<0,0958	<0,0958
K12-Ø-M	2018	AFFF	Fagernes airport			Brown Trout	Salmo trutta	Muscle	29.5	248	<0,0470	<0,0470	<0,0470	<0,0470	<0,0470	<0,0470	0.0678	0.0513	<0,0470	<0,0470	<0,0470			<0,0706		<0,0706	<0,0706	22.6			<0,0706		0.462								<0,0941	<0,0706	<0,0941				<0,0941	<0,0941
K01-A-M	2018	AFFF	Fagernes airport			Perch	Perca fluviatilis	Muscle	23	156	<0,0488	<0,0488	<0,0488	<0,0488	<0,0488	0.356	0.373	0.895	0.364	0.643	0.0725			<0,0732		<0,0732	<0,0732	24.9			<0,0732		0.113								<0,0976	<0,0732	<0,0976				<0,0976	<0,0976
K02-A-M	2018	AFFF	Fagernes airport			Perch	Perca fluviatilis	Muscle	24.5	153	<0,0485	<0,0485	<0,0485	<0,0485	<0,0485	<0,0485	0.188	0.102	<0,0485	0.0496	<0,0485			<0,0727		0.0867	0.0756	77.2			<0,0727		0.595								<0,0969	<0,0727	0.199				<0,0969	<0,0969
K03-A-M	2018	AFFF	Fagernes airport			Perch	Perca fluviatilis	Muscle	24	172	<0,0493	<0,0493	<0,0493	<0,0493	<0,0493	<0,0493	0.507	0.244	0.0511	0.0761	<0,0493			<0,0739		<0,0739	0.19	170			0.318		1.11								<0,0986	0.532	1.39				<0,0986	<0,0986
K04-A-M	2018	AFFF	Fagernes airport			Perch	Perca fluviatilis	Muscle	26.5	228	<0,0471	<0,0471	<0,0471	<0,0471	<0,0471	<0,0471	0.934	0.438	0.0749	0.0589	<0,0471			<0,0707		0.185	0.219	306			1.28		3.03								<0,0943	<0,0707	0.483				<0,0943	<0,0943
K05-A-M	2018	AFFF	Fagernes airport			Perch	Perca fluviatilis	Muscle	25.5	199	<0,0470	<0,0470	0.0715	<0,0470	<0,0470	<0,0470	0.594	0.285	<0,0470	<0,0470	<0,0470			<0,0705		0.0986	0.087	179			0.443		0.724								<0,0941	<0,0705	0.303				<0,0941	<0,0941
K06-A-M	2018	AFFF	Fagernes airport			Perch	Perca fluviatilis	Muscle	25	179	<0,0488	<0,0488	0.075	<0,0488	<0,0488	<0,0488	0.434	0.199	<0,0488	<0,0488	<0,0488			<0,0732		<0,0732	<0,0732	144			0.195		1.47								<0,0977	<0,0732	0.223				<0,0977	<0,0977
K07-A-M	2018	AFFF	Fagernes airport			Perch	Perca fluviatilis	Muscle	25	192	<0,0475	<0,0475	<0,0475	<0,0475	<0,0475	<0,0475	0.228	0.115	<0,0475	<0,0475	<0,0475			<0,0712		0.0965	<0,0712	81			0.0902		0.685								<0,0949	<0,0712	0.217				<0,0949	<0,0949
K08-A-M	2018	AFFF	Fagernes airport			Perch	Perca fluviatilis	Muscle	25	179	<0,0489	<0,0489	<0,0489	<0,0489	<0,0489	<0,0489	0.35	0.179	<0,0489	<0,0489	<0,0489			<0,0734		0.107	<0,0734	95.1			0.141		1.41								<0,0979	<0,0734	0.158				<0,0979	<0,0979
K09-A-M	2018	AFFF	Fagernes airport			Perch	Perca fluviatilis	Muscle	23	148	<0,0483	<0,0483	<0,0483	<0,0483	<0,0483	<0,0483	0.205	0.197	<0,0483	0.0693	<0,0483			<0,0724		0.0804	<0,0724	89.1			<0,0724		0.601								<0,0966	<0,0724	0.159				<0,0966	<0,0966
K10-A-M	2018	AFFF	Fagernes airport			Perch	Perca fluviatilis	Muscle	27.5	249	<0,0495	<0,0495	<0,0495	<0,0495	<0,0495	0.0716	0.757	0.409	0.0746	0.108	<0,0495			<0,0742		0.081	0.118	188			0.523		1.81								<0,0989	<0,0742	0.405				<0,0989	<0,0989
K11-A-M	2018	AFFF	Fagernes airport			Perch	Perca fluviatilis	Muscle	24.5	180	<0,0494	<0,0494	<0,0494	<0,0494	<0,0494	<0,0494	0.493	0.27	<0,0494	0.0941	<0,0494			<0,0741		0.149	0.0885	153			0.188		0.454								<0,0988	<0,0741	0.271				<0,0988	<0,0988
K12-A-M	2018	AFFF	Fagernes airport			Perch	Perca fluviatilis	Muscle	28	250	<0,0466	<0,0466	<0,0466	<0,0466	<0,0466	<0,0466	0.883	0.467	0.0745	0.112	<0,0466			<0,0699		0.074	0.177	248			0.848		2.69								<0,0933	<0,0699	0.909				<0,0933	<0,0933
K01-S-M	2018	AFFF	Fagernes airport			Whitefish	Coregonus lavaretus	Muscle	35	381	<0,0481	<0,0481	<0,0481	<0,0481	<0,0481	0.0509	0.148	<0,0481	<0,0481	<0,0481	<0,0481			<0,0721		0.193	<0,0721	48.4			<0,0721		1.65								<0,0962	<0,0721	<0,0962				<0,0962	<0,0962
K02-S-M	2018	AFFF	Fagernes airport			Whitefish	Coregonus lavaretus	Muscle	40.5	571	<0,0492	<0,0492	<0,0492	<0,0492	<0,0492	0.0687	0.109	<0,0492	<0,0492	<0,0492	<0,0492			<0,0738		0.233	<0,0738	49.7			<0,0738		1.63								<0,0984	<0,0738	<0,0984				<0,0984	<0,0984
K03-S-M	2018	AFFF	Fagernes airport			Whitefish	Coregonus lavaretus	Muscle	43	625	<0,0468	<0,0468	<0,0468	<0,0468	<0,0468	0.0638	0.0841	<0,0468	<0,0468	<0,0468	<0,0468			<0,0702		0.141	<0,0702	28.8			<0,0702		0.826								<0,0935	<0,0702	<0,0935				<0,0935	<0,0935
K04-S-M	2018	AFFF	Fagernes airport			Whitefish	Coregonus lavaretus	Muscle	39	564	<0,0497	<0,0497	<0,0497	<0,0497	<0,0497	0.158	0.34	0.128	<0,0497	0.104	<0,0497			<0,0746		0.219	0.0943	117			0.105		0.806								<0,0994	<0,0746	<0,0994				<0,0994	<0,0994
K05-S-M	2018	AFFF	Fagernes airport			Whitefish	Coregonus lavaretus	Muscle	41	533	<0,0481	<0,0481	<0,0481	<0,0481	<0,0481	0.0513	0.0644	<0,0481	<0,0481	<0,0481	<0,0481			<0,0722		<0,0722	<0,0722	21.5			<0,0722		0.565								<0,0962	<0,0722	<0,0962				<0,0962	<0,0962
K06-S-M	2018	AFFF	Fagernes airport			Whitefish	Coregonus lavaretus	Muscle	34.5	346	<0,0484	<0,0484	<0,0484	<0,0484	<0,0484	<0,0484	0.0556	<0,0484	<0,0484	<0,0484	<0,0484			<0,0726		<0,0726	<0,0726	25			<0,0726		1.48								<0,0968	<0,0726	<0,0968				<0,0968	<0,0968
STF-Ø01-M	2018	AFFF	Fagernes airport			Brown Trout	Salmo trutta	Muscle	32.5	324	<0,500	<0,500	<0,500	<0,500	<0,500	<0,500	<0,500	<0,500	<0,500	<0,500	<0,500			<0,750		<0,750	<0,750	14.6			<0,750		0.919								<1,00	<0,750	<1,00				<1,00	<1,00
STF-Ø02-M	2018	AFFF	Fagernes airport			Brown Trout	Salmo trutta	Muscle	33.5	386	<0,500	<0,500	<0,500	<0,500	<0,500	<0,500	<0,500	<0,500	<0,500	<0,500	<0,500			<0,750		<0,750	<0,750	0.508			<0,750		<0,500								<1,00	<0,750	<1,00				<1,00	<1,00
STF-Ø03-M	2018	AFFF	Fagernes airport			Brown Trout	Salmo trutta	Muscle	33.5	350	<0,500	<0,500	<0,500	<0,500	<0,500	<0,500	<0,500	<0,500	<0,500	<0,500	<0,500			<0,750		<0,750	<0,750	5.76			<0,750		<0,500								<1,00	<0,750	<1,00				<1,00	<1,00
STF-Ø04-M	2018	AFFF	Fagernes airport			Brown Trout	Salmo trutta	Muscle	34	368	<0,500	<0,500	<0,500	<0,500	<0,500	<0,500	<0,500	<0,500	<0,500	<0,500	<0,500			<0,750		<0,750	<0,750	3.16			<0,750		<0,500								<1,00	<0,750	<1,00				<1,00	<1,00
STF-Ø05-M	2018	AFFF	Fagernes airport			Brown Trout	Salmo trutta	Muscle	32	327	<0,500	<0,500	<0,500	<0,500	<0,500	<0,500	<0,500	<0,500	<0,500	<0,500	<0,500			<0,750		<0,750	<0,750	3.34			<0,750		<0,500								<1,00	<0,750	<1,00				<1,00	<1,00
STF-Ø06-M	2018	AFFF	Fagernes airport			Brown Trout	Salmo trutta	Muscle	35	417	<0,500	<0,500	<0,500	<0,500	<0,500	<0,500	<0,500	<0,500	<0,500	<0,500	<0,500			<0,750		<0,750	<0,750	10.8			<0,750		0.723								<1,00	<0,750	<1,00				<1,00	<1,00
STF-Ø07-M	2018	AFFF	Fagernes airport			Brown Trout	Salmo trutta	Muscle	34.5	414	<0,500	<0,500	<0,500	<0,500	<0,500	<0,500	<0,500	<0,500	<0,500	<0,500	<0,500			<0,750		<0,750	<0,750	2.38			<0,750		<0,500								<1,00	<0,750	<1,00				<1,00	<1,00
STF-Ø08-M	2018	AFFF	Fagernes airport			Brown Trout	Salmo trutta	Muscle	35	418	<0,500	<0,500	<0,500	<0,500	<0,500	<0,500	<0,500	<0,500	<0,500	<0,500	<0,500			<0,750		<0,750	<0,750	9.54			<0,750		<0,500								<1,00	<0,750	<1,00				<1,00	<1,00
STF-Ø09-M	2018	AFFF	Fagernes airport			Brown Trout	Salmo trutta	Muscle	37	501	<0,500	<0,500	<0,500	<0,500	<0,500	<0,500	<0,500	<0,500	<0,500	<0,500	<0,500			<0,750		<0,750	<0,750	0.809			<0,750		<0,500								<1,00	<0,750	<1,00				<1,00	<1,00
STF-Ø10-M	2018	AFFF	Fagernes airport			Brown Trout	Salmo trutta	Muscle	36	475	<0,500	<0,500	<0,500	<0,500	<0,500	<0,500	<0,500	<0,500	<0,500	<0,500	<0,500			<0,750		<0,750	<0,750	2.31			<0,750		<0,500								<1,00	<0,750	<1,00				<1,00	<1,00
STF-Ø11-M	2018	AFFF	Fagernes airport			Brown Trout	Salmo trutta	Muscle	41	657	<0,500	<0,500	<0,500	<0,500	<0,500	<0,500	<0,500	<0,500	<0,500	<0,500	<0,500			<0,750		<0,750	<0,750	4.91			<0,750		<0,500								<1,00	<0,750	<1,00				<1,00	<1,00
STF-Ø12-M	2018	AFFF	Fagernes airport			Brown Trout	Salmo trutta	Muscle	42.5	725	<0,500	<0,500	<0,500	<0,500	<0,500	<0,500	<0,500	<0,500	<0,500	<0,500	<0,500			<0,750		<0,750	<0,750	2.91			<0,750		<0,500								<1,00	<0,750	<1,00				<1,00	<1,00
STF-A01-M	2018	AFFF	Fagernes airport			Perch	Perca fluviatilis	Muscle	24.5	199	<0,500	<0,500	<0,500	<0,500	<0,500	<0,500	<0,500	<0,500	<0,500	<0,500	<0,500			<0,750		<0,750	<0,750	11			<0,750		<0,500								<1,00	<0,750	<1,00				<1,00	<1,00
STF-A02-M	2018	AFFF	Fagernes airport			Perch	Perca fluviatilis	Muscle	21.5	115	<0,500	<0,500	<0,500	<0,500	<0,500	<0,500	<0,500	<0,500	<0,500	<0,500	<0,500			<0,750		<0,750	<0,750	10.4			<0,750		<0,500								<1,00	<0,750	<1,00				<1,00	<1,00
STF-A03-M	2018	AFFF	Fagernes airport			Perch	Perca fluviatilis	Muscle	25.5	199	<0,500	<0,500	<0,500	<0,500	<0,500	<0,500	<0,500	<0,500	<0,500	<0,500	<0,500			<0,750		<0,750	<0,750	7.46			<0,750		<0,500								<1,00	<0,750	<1,00				<1,00	<1,00
STF-A04-M	2018	AFFF	Fagernes airport			Perch	Perca fluviatilis	Muscle	26	229	<0,500	<0,500	<0,500	<0,500	<0,500	<0,500	<0,500	0.501	<0,500	0.713	<0,500			<0,750		<0,750	<0,750	15.5			<0,750		<0,500								<1,00	<0,750	<1,00				<1,00	<1,00
STF-A05-M	2018	AFFF	Fagernes airport			Perch	Perca fluviatilis	Muscle	26.5	234	<0,500	<0,500	<0,500	<0,500	<0,500	<0,500	<0,500	<0,500	<0,500	<0,500	<0,500			<0,750		<0,750	<0,750	10.8			<0,750		<0,500								<1,00	<0,750	<1,00				<1,00	<1,00
STF-A06-M	2018	AFFF	Fagernes airport			Perch	Perca fluviatilis	Muscle	21	118	<0,500	<0,500	<0,500	<0,500	<0,500	<0,500	<0,500	0.648	<0,500	0.944	<0,500			<0,750		<0,750	<0,750	14.6			<0,750		<0,500								<1,00	<0,750	<1,00				<1,00	<1,00
STF-A07-M	2018	AFFF	Fagernes airport			Perch	Perca fluviatilis	Muscle	26	223	<0,500	<0,500	<0,500	<0,500	<0,500	<0,500	<0,500	1.05	<0,500	0.7	<0,500			<0,750		<0,750	<0,750	21.5			<0,750		<0,500								<1,00	<0,750	<1,00				<1,00	<1,00
STF-A08-M	2018	AFFF	Fagernes airport			Perch	Perca fluviatilis	Muscle	27.5	283	<0,500	<0,500	<0,500	<0,500	<0,500	<0,500	<0,500	0.592	<0,500	0.582	<0,500			<0,750		<0,750	<0,750	20.8			<0,750		<0,500								<1,00	<0,750	<1,00				<1,00	<1,00
STF-A09-M	2018	AFFF	Fagernes airport			Perch	Perca fluviatilis	Muscle	29.5	281	<0,500	<0,500	<0,500	<0,500	<0,500	<0,500	<0,500	<0,500	<0,500	<0,500	<0,500			<0,750		<0,750	<0,750	8.1			<0,750		<0,500								<1,00	<0,750	<1,00				<1,00	<1,00
STF-A10-M	2018	AFFF	Fagernes airport			Perch	Perca fluviatilis	Muscle	31	327	<0,500	<0,500	<0,500	<0,500	<0,500	<0,500	<0,500	<0,500	<0,500	<0,500	<0,500			<0,750		<0,750	<0,750	5.83			<0,750		<0,500								<1,00	<0,750	<1,00				<1,00	<1,00
STF-S01-M	2018	AFFF	Fagernes airport			Whitefish	Coregonus lavaretus	Muscle	34	331	<0,500	<0,500	<0,500	<0,500	<0,500	<0,500	<0,500	<0,500	<0,500	<0,500	<0,500			<0,750		<0,750	<0,750	4.28			<0,750		<0,500								<1,00	<0,750	<1,00				<1,00	<1,00
STF-S02-M	2018	AFFF	Fagernes airport			Whitefish	Coregonus lavaretus	Muscle	32.5	342	<0,500	<0,500	<0,500	<0,500	<0,500	<0,500	<0,500	<0,500	<0,500	<0,500	<0,500			<0,750		<0,750	<0,750	0.566			<0,750		<0,500								<1,00	<0,750	<1,00				<1,00	<1,00
STF-S03-M	2018	AFFF	Fagernes airport			Whitefish	Coregonus lavaretus	Muscle	32	301	<0,500	<0,500	<0,500	<0,500	<0,500	<0,500	<0,500	<0,500	<0,500	<0,500	<0,500			<0,750		<0,750	<0,750	0.807			<0,750		<0,500								<1,00	<0,750	<1,00				<1,00	<1,00
STF-S04-M	2018	AFFF	Fagernes airport			Whitefish	Coregonus lavaretus	Muscle	33.5	306	<0,500	<0,500	<0,500	<0,500	<0,500	<0,500	<0,500	<0,500	<0,500	<0,500	<0,500			<0,750		<0,750	<0,750	2.97			<0,750		<0,500								<1,00	<0,750	<1,00				<1,00	<1,00
STF-S05-M	2018	AFFF	Fagernes airport			Whitefish	Coregonus lavaretus	Muscle	33	350	<0,500	<0,500	<0,500	<0,500	<0,500	<0,500	<0,500	<0,500	<0,500	<0,500	<0,500			<0,750		<0,750	<0,750	<0,500			<0,750		<0,500								<1,00	<0,750	<1,00				<1,00	<1,00
STF-S06-M	2018	AFFF	Fagernes airport			Whitefish	Coregonus lavaretus	Muscle	33.5	318	<0,500	<0,500	<0,500	<0,500	<0,500	<0,500	<0,500	<0,500	<0,500	<0,500	<0,500			<0,750		<0,750	<0,750	1.99			<0,750		<0,500								<1,00	<0,750	<1,00				<1,00	<1,00
STF-S07-M	2018	AFFF	Fagernes airport			Whitefish	Coregonus lavaretus	Muscle	35.2	410	<0,500	<0,500	<0,500	<0,500	<0,500	<0,500	<0,500	<0,500	<0,500	<0,500	<0,500			<0,750		<0,750	<0,750	2.6			<0,750		<0,500								<1,00	<0,750	<1,00				<1,00	<1,00
STF-S08-M	2018	AFFF	Fagernes airport			Whitefish	Coregonus lavaretus	Muscle	32.5	341	<0,500	<0,500	<0,500	<0,500	<0,500	<0,500	<0,500	<0,500	<0,500	<0,500	<0,500			<0,750		<0,750	<0,750	1.6			<0,750		<0,500								<1,00	<0,750	<1,00				<1,00	<1,00
STF-S09-M	2018	AFFF	Fagernes airport			Whitefish	Coregonus lavaretus	Muscle	33	347	<0,500	<0,500	<0,500	<0,500	<0,500	<0,500	<0,500	<0,500	<0,500	<0,500	<0,500			<0,750		<0,750	<0,750	2.2			<0,750		<0,500								<1,00	<0,750	<1,00				<1,00	<1,00
STF-S10-M	2018	AFFF	Fagernes airport			Whitefish	Coregonus lavaretus	Muscle	35	336	<0,500	<0,500	<0,500	<0,500	<0,500	<0,500	<0,500	<0,500	<0,500	<0,500	<0,500			<0,750		<0,750	<0,750	5.8			<0,750		<0,500								<1,00	<0,750	<1,00				<1,00	<1,00
STF-S11-M	2018	AFFF	Fagernes airport			Whitefish	Coregonus lavaretus	Muscle	31	243	<0,500	<0,500	<0,500	<0,500	<0,500	<0,500	<0,500	<0,500	<0,500	<0,500	<0,500			<0,750		<0,750	<0,750	5.98			<0,750		<0,500								<1,00	<0,750	<1,00				<1,00	<1,00
STF-S12-M	2018	AFFF	Fagernes airport			Whitefish	Coregonus lavaretus	Muscle	39	585	<0,500	<0,500	<0,500	<0,500	<0,500	<0,500	<0,500	<0,500	<0,500	<0,500	<0,500			<0,750		<0,750	<0,750	2.13			<0,750		<0,500								<1,00	<0,750	<1,00				<1,00	<1,00
LM-Ø01-M	2018	AFFF	Fagernes airport			Brown Trout	Salmo trutta	Muscle	31	260	<0,500	<0,500	<0,500	<0,500	<0,500	<0,500	<0,500	<0,500	<0,500	<0,500	<0,500			<0,750		<0,750	<0,750	3.01			<0,750		<0,500								<1,00	<0,750	<1,00				<1,00	<1,00
LM-Ø02-M	2018	AFFF	Fagernes airport			Brown Trout	Salmo trutta	Muscle	27.2	204	<0,500	<0,500	<0,500	<0,500	<0,500	<0,500	<0,500	<0,500	<0,500	<0,500	<0,500			<0,750		<0,750	<0,750	7.6			<0,750		<0,500								<1,00	<0,750	<1,00				<1,00	<1,00
LM-Ø03-M	2018	AFFF	Fagernes airport			Brown Trout	Salmo trutta	Muscle	28.5	251	<0,500	<0,500	<0,500	<0,500	<0,500	<0,500	<0,500	<0,500	<0,500	<0,500	<0,500			<0,750		<0,750	<0,750	1.98			<0,750		<0,500								<1,00	<0,750	<1,00				<1,00	<1,00
LM-Ø04-M	2018	AFFF	Fagernes airport			Brown Trout	Salmo trutta	Muscle	29.5	251	<0,500	<0,500	<0,500	<0,500	<0,500	<0,500	<0,500	<0,500	<0,500	<0,500	<0,500			<0,750		<0,750	<0,750	9.99			<0,750		<0,500								<1,00	<0,750	<1,00				<1,00	<1,00
LM-Ø05-M	2018	AFFF	Fagernes airport			Brown Trout	Salmo trutta	Muscle	26	197	<0,500	<0,500	<0,500	<0,500	<0,500	<0,500	<0,500	<0,500	<0,500	<0,500	<0,500			<0,750		<0,750	<0,750	3.45			<0,750		<0,500								<1,00	<0,750	<1,00				<1,00	<1,00
LM-Ø06-M	2018	AFFF	Fagernes airport			Brown Trout	Salmo trutta	Muscle	29	256	<0,500	<0,500	<0,500	<0,500	<0,500	<0,500	<0,500	<0,500	<0,500	<0,500	<0,500			<0,750		<0,750	<0,750	5.14			<0,750		<0,500								<1,00	<0,750	<1,00				<1,00	<1,00
LM-Ø07-M	2018	AFFF	Fagernes airport			Brown Trout	Salmo trutta	Muscle	30	295	<0,500	<0,500	<0,500	<0,500	<0,500	<0,500	<0,500	<0,500	<0,500	<0,500	<0,500			<0,750		<0,750	<0,750	9.55			<0,750		<0,500								<1,00	<0,750	<1,00				<1,00	<1,00
LM-Ø08-M	2018	AFFF	Fagernes airport			Brown Trout	Salmo trutta	Muscle	29	232	<0,500	<0,500	<0,500	<0,500	<0,500	<0,500	<0,500	<0,500	<0,500	<0,500	<0,500			<0,750		<0,750	<0,750	10.4			<0,750		<0,500								<1,00	<0,750	<1,00				<1,00	<1,00
LM-Ø09-M	2018	AFFF	Fagernes airport			Brown Trout	Salmo trutta	Muscle	30	261	<0,500	<0,500	<0,500	<0,500	<0,500	<0,500	<0,500	<0,500	<0,500	<0,500	<0,500			<0,750		<0,750	<0,750	9.43			<0,750		<0,500								<1,00	<0,750	<1,00				<1,00	<1,00
LM-Ø10-M	2018	AFFF	Fagernes airport			Brown Trout	Salmo trutta	Muscle	35	389	<0,500	<0,500	<0,500	<0,500	<0,500	<0,500	<0,500	<0,500	<0,500	<0,500	<0,500			<0,750		<0,750	<0,750	16.6			<0,750		<0,500								<1,00	<0,750	<1,00				<1,00	<1,00
LM-Ø11-M	2018	AFFF	Fagernes airport			Brown Trout	Salmo trutta	Muscle	32	299	<0,500	<0,500	<0,500	<0,500	<0,500	<0,500	<0,500	<0,500	<0,500	<0,500	<0,500			<0,750		<0,750	<0,750	9.47			<0,750		<0,500								<1,00	<0,750	<1,00				<1,00	<1,00
LM-Ø12-M	2018	AFFF	Fagernes airport			Brown Trout	Salmo trutta	Muscle	27.1	193	<0,500	<0,500	<0,500	<0,500	<0,500	<0,500	<0,500	<0,500	<0,500	<0,500	<0,500			<0,750		<0,750	<0,750	19.4			<0,750		<0,500								<1,00	<0,750	<1,00				<1,00	<1,00
LM-A01-M	2018	AFFF	Fagernes airport			Perch	Perca fluviatilis	Muscle	25	190	<0,500	<0,500	<0,500	<0,500	<0,500	<0,500	<0,500	<0,500	<0,500	<0,500	<0,500			<0,750		<0,750	<0,750	8.63			<0,750		<0,500								<1,00	<0,750	<1,00				<1,00	<1,00
LM-A02-M	2018	AFFF	Fagernes airport			Perch	Perca fluviatilis	Muscle	22	142	<0,500	<0,500	<0,500	<0,500	<0,500	<0,500	<0,500	<0,500	<0,500	<0,500	<0,500			<0,750		<0,750	<0,750	14.7			<0,750		<0,500								<1,00	<0,750	<1,00				<1,00	<1,00
LM-A03-M	2018	AFFF	Fagernes airport			Perch	Perca fluviatilis	Muscle	23	154	<0,500	<0,500	<0,500	<0,500	<0,500	<0,500	0.658	1.34	<0,500	1.26	<0,500			<0,750		<0,750	<0,750	38.8			<0,750		<0,500								<1,00	<0,750	<1,00				<1,00	<1,00
LM-A04-M	2018	AFFF	Fagernes airport			Perch	Perca fluviatilis	Muscle	25	191	<0,500	<0,500	<0,500	<0,500	<0,500	<0,500	<0,500	<0,500	<0,500	<0,500	<0,500			<0,750		<0,750	<0,750	3.7			<0,750		<0,500								<1,00	<0,750	<1,00				<1,00	<1,00
LM-A05-M	2018	AFFF	Fagernes airport			Perch	Perca fluviatilis	Muscle	27.1	264	<0,500	<0,500	<0,500	<0,500	<0,500	<0,500	<0,500	1.12	<0,500	0.811	<0,500			<0,750		<0,750	<0,750	34.8			<0,750		<0,500								<1,00	<0,750	<1,00				<1,00	<1,00
LM-A06-M	2018	AFFF	Fagernes airport			Perch	Perca fluviatilis	Muscle	28.5	288	<0,500	<0,500	<0,500	<0,500	<0,500	<0,500	<0,500	<0,500	<0,500	<0,500	<0,500			<0,750		<0,750	<0,750	7.95			<0,750		<0,500								<1,00	<0,750	<1,00				<1,00	<1,00
LM-A07-M	2018	AFFF	Fagernes airport			Perch	Perca fluviatilis	Muscle	24.5	194	<0,500	<0,500	<0,500	<0,500	<0,500	<0,500	<0,500	0.678	<0,500	0.688	<0,500			<0,750		<0,750	<0,750	21.6			<0,750		<0,500								<1,00	<0,750	<1,00				<1,00	<1,00
LM-A08-M	2018	AFFF	Fagernes airport			Perch	Perca fluviatilis	Muscle	25.2	211	<0,500	<0,500	<0,500	<0,500	<0,500	<0,500	<0,500	1.05	<0,500	1.1	<0,500			<0,750		<0,750	<0,750	27.6			<0,750		<0,500								<1,00	<0,750	<1,00				<1,00	<1,00
LM-A09-M	2018	AFFF	Fagernes airport			Perch	Perca fluviatilis	Muscle	27	230	<0,500	<0,500	<0,500	<0,500	<0,500	<0,500	<0,500	1.23	<0,500	0.9	<0,500			<0,750		<0,750	<0,750	25.5			<0,750		<0,500								<1,00	<0,750	<1,00				<1,00	<1,00
LM-A10-M	2018	AFFF	Fagernes airport			Perch	Perca fluviatilis	Muscle	26.2	243	<0,500	<0,500	<0,500	<0,500	<0,500	<0,500	<0,500	1.01	<0,500	0.88	<0,500			<0,750		<0,750	<0,750	42.7			<0,750		<0,500								<1,00	<0,750	<1,00				<1,00	<1,00
LM-A11-M	2018	AFFF	Fagernes airport			Perch	Perca fluviatilis	Muscle	26.2	239	<0,500	<0,500	<0,500	<0,500	<0,500	<0,500	<0,500	0.88	<0,500	1.24	<0,500			<0,750		<0,750	<0,750	27			<0,750		<0,500								<1,00	<0,750	<1,00				<1,00	<1,00
LM-A12-M	2018	AFFF	Fagernes airport			Perch	Perca fluviatilis	Muscle	24.5	197	<0,500	<0,500	<0,500	<0,500	<0,500	<0,500	<0,500	<0,500	<0,500	<0,500	<0,500			<0,750		<0,750	<0,750	8.96			<0,750		<0,500								<1,00	<0,750	<1,00				<1,00	<1,00
LM-S01-M	2018	AFFF	Fagernes airport			Whitefish	Coregonus lavaretus	Muscle	28	254	<0,500	<0,500	<0,500	<0,500	<0,500	<0,500	<0,500	<0,500	<0,500	<0,500	<0,500			<0,750		<0,750	<0,750	5.22			<0,750		<0,500								<1,00	<0,750	<1,00				<1,00	<1,00
LM-S02-M	2018	AFFF	Fagernes airport			Whitefish	Coregonus lavaretus	Muscle	31.2	263	<0,500	<0,500	<0,500	<0,500	<0,500	<0,500	<0,500	0.695	<0,500	<0,500	<0,500			<0,750		<0,750	<0,750	20.9			<0,750		<0,500								<1,00	<0,750	<1,00				<1,00	<1,00
LM-S03-M	2018	AFFF	Fagernes airport			Whitefish	Coregonus lavaretus	Muscle	29	225	<0,500	<0,500	<0,500	<0,500	<0,500	<0,500	<0,500	<0,500	<0,500	<0,500	<0,500			<0,750		<0,750	<0,750	5.3			<0,750		<0,500								<1,00	<0,750	<1,00				<1,00	<1,00
LM-S04-M	2018	AFFF	Fagernes airport			Whitefish	Coregonus lavaretus	Muscle	29.2	249	<0,500	<0,500	<0,500	<0,500	<0,500	<0,500	<0,500	<0,500	<0,500	<0,500	<0,500			<0,750		<0,750	<0,750	1.05			<0,750		<0,500								<1,00	<0,750	<1,00				<1,00	<1,00
LM-S05-M	2018	AFFF	Fagernes airport			Whitefish	Coregonus lavaretus	Muscle	33	378	<0,500	<0,500	<0,500	<0,500	<0,500	<0,500	<0,500	<0,500	<0,500	<0,500	<0,500			<0,750		<0,750	<0,750	<0,500			<0,750		<0,500								<1,00	<0,750	<1,00				<1,00	<1,00
LM-S06-M	2018	AFFF	Fagernes airport			Whitefish	Coregonus lavaretus	Muscle	36	523	<0,500	<0,500	<0,500	<0,500	<0,500	<0,500	<0,500	<0,500	<0,500	<0,500	<0,500			<0,750		<0,750	<0,750	1.78			<0,750		<0,500								<1,00	<0,750	<1,00				<1,00	<1,00
LM-S07-M	2018	AFFF	Fagernes airport			Whitefish	Coregonus lavaretus	Muscle	26.2	179	<0,500	<0,500	<0,500	<0,500	<0,500	<0,500	<0,500	<0,500	<0,500	<0,500	<0,500			<0,750		<0,750	<0,750	2.65			<0,750		<0,500								<1,00	<0,750	<1,00				<1,00	<1,00
LM-S08-M	2018	AFFF	Fagernes airport			Whitefish	Coregonus lavaretus	Muscle	30.5	304	<0,500	<0,500	<0,500	<0,500	<0,500	<0,500	<0,500	<0,500	<0,500	<0,500	<0,500			<0,750		<0,750	<0,750	3.95			<0,750		<0,500								<1,00	<0,750	<1,00				<1,00	<1,00
LM-S09-M	2018	AFFF	Fagernes airport			Whitefish	Coregonus lavaretus	Muscle	23.8	105	<0,500	<0,500	<0,500	<0,500	<0,500	<0,500	<0,500	<0,500	<0,500	<0,500	<0,500			<0,750		<0,750	<0,750	4.61			<0,750		<0,500								<1,00	<0,750	<1,00				<1,00	<1,00
LM-S10-M	2018	AFFF	Fagernes airport			Whitefish	Coregonus lavaretus	Muscle	38	610	<0,500	<0,500	<0,500	<0,500	<0,500	<0,500	<0,500	<0,500	<0,500	<0,500	<0,500			<0,750		<0,750	<0,750	2.33			<0,750		<0,500								<1,00	<0,750	<1,00				<1,00	<1,00
LM-S11-M	2018	AFFF	Fagernes airport			Whitefish	Coregonus lavaretus	Muscle	33	399	<0,500	<0,500	<0,500	<0,500	<0,500	<0,500	<0,500	<0,500	<0,500	<0,500	<0,500			<0,750		<0,750	<0,750	4.15			<0,750		<0,500								<1,00	<0,750	<1,00				<1,00	<1,00
LM-S12-M	2018	AFFF	Fagernes airport			Whitefish	Coregonus lavaretus	Muscle	33.4	334	<0,500	<0,500	<0,500	<0,500	<0,500	<0,500	<0,500	<0,500	<0,500	<0,500	<0,500			<0,750		<0,750	<0,750	1.6			<0,750		<0,500								<1,00	<0,750	<1,00				<1,00	<1,00
SUF-Ø01-M	2018	AFFF	Fagernes airport			Brown Trout	Salmo trutta	Muscle	32.1	306	<0,500	<0,500	<0,500	<0,500	<0,500	<0,500	<0,500	<0,500	<0,500	<0,500	<0,500			<0,750		<0,750	<0,750	1.81			<0,750		<0,500								<1,00	<0,750	<1,00				<1,00	<1,00
SUF-Ø02-M	2018	AFFF	Fagernes airport			Brown Trout	Salmo trutta	Muscle	35.1	400	<0,500	<0,500	<0,500	<0,500	<0,500	<0,500	<0,500	<0,500	<0,500	<0,500	<0,500			<0,750		<0,750	<0,750	3.3			<0,750		<0,500								<1,00	<0,750	<1,00				<1,00	<1,00
SUF-Ø03-M	2018	AFFF	Fagernes airport			Brown Trout	Salmo trutta	Muscle	34.2	361	<0,500	<0,500	<0,500	<0,500	<0,500	<0,500	<0,500	<0,500	<0,500	<0,500	<0,500			<0,750		<0,750	<0,750	<0,500			<0,750		<0,500								<1,00	<0,750	<1,00				<1,00	<1,00
SUF-Ø04-M	2018	AFFF	Fagernes airport			Brown Trout	Salmo trutta	Muscle	35	405	<0,500	<0,500	<0,500	<0,500	<0,500	<0,500	<0,500	<0,500	<0,500	<0,500	<0,500			<0,750		<0,750	<0,750	0.505			<0,750		<0,500								<1,00	<0,750	<1,00				<1,00	<1,00
SUF-Ø05-M	2018	AFFF	Fagernes airport			Brown Trout	Salmo trutta	Muscle	31.3	308	<0,500	<0,500	<0,500	<0,500	<0,500	<0,500	<0,500	<0,500	<0,500	<0,500	<0,500			<0,750		<0,750	<0,750	1.94			<0,750		<0,500								<1,00	<0,750	<1,00				<1,00	<1,00
SUF-Ø06-M	2018	AFFF	Fagernes airport			Brown Trout	Salmo trutta	Muscle	31.1	327	<0,500	<0,500	<0,500	<0,500	<0,500	<0,500	<0,500	<0,500	<0,500	<0,500	<0,500			<0,750		<0,750	<0,750	4.43			<0,750		<0,500								<1,00	<0,750	<1,00				<1,00	<1,00
SUF-Ø07-M	2018	AFFF	Fagernes airport			Brown Trout	Salmo trutta	Muscle	33	384	<0,500	<0,500	<0,500	<0,500	<0,500	<0,500	<0,500	<0,500	<0,500	<0,500	<0,500			<0,750		<0,750	<0,750	<0,500			<0,750		<0,500								<1,00	<0,750	<1,00				<1,00	<1,00
SUF-Ø08-M	2018	AFFF	Fagernes airport			Brown Trout	Salmo trutta	Muscle	33	365	<0,500	<0,500	<0,500	<0,500	<0,500	<0,500	<0,500	<0,500	<0,500	<0,500	<0,500			<0,750		<0,750	<0,750	3.44			<0,750		<0,500								<1,00	<0,750	<1,00				<1,00	<1,00
SUF-Ø09-M	2018	AFFF	Fagernes airport			Brown Trout	Salmo trutta	Muscle	32.1	340	<0,500	<0,500	<0,500	<0,500	<0,500	<0,500	<0,500	<0,500	<0,500	<0,500	<0,500			<0,750		<0,750	<0,750	<0,500			<0,750		<0,500								<1,00	<0,750	<1,00				<1,00	<1,00
SUF-Ø10-M	2018	AFFF	Fagernes airport			Brown Trout	Salmo trutta	Muscle	33.2	345	<0,500	<0,500	<0,500	<0,500	<0,500	<0,500	<0,500	<0,500	<0,500	<0,500	<0,500			<0,750		<0,750	<0,750	1.59			<0,750		<0,500								<1,00	<0,750	<1,00				<1,00	<1,00
LM-L-1	2016	Diffuse	Lake Mjøsa			Vendace	Coregonus albula	Liver	21.4	73.4		<0,5	<0,5	<0,5	<0,5	<0,5	<0,5	0.7	<0,4	0.5	<0,4	<0,4		<0,2	<0,2	<0,1	<0,2	1		<0,2	<0,2	<0,2	<0,1	<0,3	<0,3	<5	<5		<0,3	<0,3	<0,3	<0,3	<0,3
LM-L-2	2016	Diffuse	Lake Mjøsa			Vendace	Coregonus albula	Liver	17.38	40.6		<0,5	<0,5	<0,5	<0,5	<0,5	<0,5	0.9	0.5	0.5	<0,4	<0,4		<0,2	<0,2	<0,1	<0,2	1.4		<0,2	<0,2	<0,2	<0,1	<0,3	<0,3	<5	<5		<0,3	<0,3	<0,3	<0,3	<0,3
LM-L-3	2016	Diffuse	Lake Mjøsa			Vendace	Coregonus albula	Liver	19.14	0.61887		<0,5	<0,5	<0,5	<0,5	<0,5	<0,5	0.8	<0,4	<0,4	<0,4	<0,4		<0,2	<0,2	<0,1	<0,2	1.4		<0,2	<0,2	<0,2	<0,1	<0,3	<0,3	<5	<5		<0,3	<0,3	<0,3	<0,3	<0,3
KM-L-1	2016	Diffuse	Lake Mjøsa			European smelt	Osmerus eperlanus	Liver	9.92727	5.06364		<0,5	<0,5	<0,5	<0,5	<0,5	0.8	2.2	0.7	3.3	<0,4	<0,4		<0,2	<0,2	<0,1	<0,2	1.7		<0,2	<0,2	<0,2	<0,1	<0,3	<0,3	<5	<5		<0,3	<0,3	<0,3	<0,3	<0,3
KM-L-2	2016	Diffuse	Lake Mjøsa			European smelt	Osmerus eperlanus	Liver	11.2625	7.0375		<0,5	<0,5	<0,5	<0,5	<0,5	<0,5	2.2	0.9	3	<0,4	<0,4		<0,2	<0,2	<0,1	<0,2	1.6		<0,2	<0,2	<0,2	<0,1	<0,3	<0,3	<5	<5		<0,3	<0,3	<0,3	<0,3	<0,3
KM-L-3	2016	Diffuse	Lake Mjøsa			European smelt	Osmerus eperlanus	Liver	16.25	27.3		<0,5	<0,5	<0,5	<0,5	<0,5	1.5	3.8	2.1	4.6	0.6	<0,4		<0,2	<0,2	<0,1	<0,2	3.9		<0,2	<0,2	<0,2	0.4	<0,3	<0,3	<5	<5		<0,3	<0,3	<0,3	<0,3	<0,3
KM-L-4	2016	Diffuse	Lake Mjøsa			European smelt	Osmerus eperlanus	Liver	18.05	35.9		<0,5	<0,5	<0,5	<0,5	<0,5	1.7	4.6	2.4	5.1	0.5	<0,4		<0,2	<0,2	<0,1	<0,2	3.6		<0,2	<0,2	<0,2	0.3	<0,3	<0,3	<5	<5		<0,3	<0,3	<0,3	<0,3	<0,3
KM-L-5	2016	Diffuse	Lake Mjøsa			European smelt	Osmerus eperlanus	Liver	18.9	42.2		<0,5	<0,5	<0,5	<0,5	<0,5	2.9	8.7	4.3	8.9	1.6	<0,4		<0,2	<0,2	<0,1	<0,2	7.3		<0,2	<0,2	<0,2	0.7	<0,3	<0,3	<5	<5		<0,3	<0,3	<0,3	<0,3	<0,3
KM-L-6	2016	Diffuse	Lake Mjøsa			European smelt	Osmerus eperlanus	Liver	20.5	57.8		<0,5	<0,5	<0,5	<0,5	<0,5	2.7	7.9	3.5	7	0.6	<0,4		<0,2	<0,2	<0,1	<0,2	7		<0,2	<0,2	<0,2	0.4	<0,3	<0,3	<5	<5		<0,3	<0,3	<0,3	<0,3	<0,3
KM-L-7	2016	Diffuse	Lake Mjøsa			European smelt	Osmerus eperlanus	Liver	24.7	90		<0,5	<0,5	<0,5	<0,5	0.5	2.8	7.9	4.1	7.3	1	<0,4		<0,2	<0,2	<0,1	<0,2	6		<0,2	<0,2	<0,2	0.6	<0,3	<0,3	<5	<5		<0,3	<0,3	<0,3	<0,3	<0,3
KM-L-8	2016	Diffuse	Lake Mjøsa			European smelt	Osmerus eperlanus	Liver	21.2	57.7		<0,5	<0,5	<0,5	<0,5	0.8	4.9	12.6	5.3	10	1.4	0.4		<0,2	<0,2	<0,1	<0,2	10		<0,2	<0,2	<0,2	0.7	<0,3	<0,3	<5	<5		<0,3	<0,3	<0,3	<0,3	<0,3
KM-L-9	2016	Diffuse	Lake Mjøsa			European smelt	Osmerus eperlanus	Liver	19.1	41.7		<0,5	<0,5	<0,5	<0,5	<0,5	0.7	2.5	1.6	2.5	<0,4	<0,4		<0,2	<0,2	<0,1	<0,2	2.2		<0,2	<0,2	<0,2	<0,1	<0,3	<0,3	<5	<5		<0,3	<0,3	<0,3	<0,3	<0,3
ØM-L-1	2016	Diffuse	Lake Mjøsa			Brown trout	Salmo trutta	Liver	69.3	4130		<0,5	<0,5	<0,5	<0,5	<0,5	1.3	3.5	1.7	2.6	0.4	<0,4		<0,2	<0,2	<0,1	<0,2	3.3		<0,2	<0,2	<0,2	<0,1	<0,3	<0,3	<5	<5		<0,3	<0,3	<0,3	<0,3	<0,3
ØM-L-2	2016	Diffuse	Lake Mjøsa			Brown trout	Salmo trutta	Liver	67.5	3710		<0,5	<0,5	<0,5	<0,5	<0,5	2.6	7.7	4.9	9.7	2.2	1.4		<0,2	<0,2	<0,1	<0,2	5.9		<0,2	<0,2	<0,2	1.1	<0,3	<0,3	<5	<5		<0,3	<0,3	<0,3	<0,3	<0,3
ØM-L-3	2016	Diffuse	Lake Mjøsa			Brown trout	Salmo trutta	Liver	64	3470		<0,5	<0,5	<0,5	<0,5	<0,5	1.3	6.1	4.7	7.5	1.9	0.9		<0,2	<0,2	<0,1	<0,2	5.1		<0,2	<0,2	<0,2	0.5	<0,3	<0,3	<5	<5		<0,3	<0,3	<0,3	<0,3	<0,3
ØM-L-4	2016	Diffuse	Lake Mjøsa			Brown trout	Salmo trutta	Liver	69.2	3610		<0,5	<0,5	<0,5	<0,5	<0,5	3.8	10	6.8	10.3	2	0.5		<0,2	<0,2	<0,1	<0,2	8		<0,2	<0,2	<0,2	0.7	<0,3	<0,3	<5	<5		<0,3	<0,3	<0,3	<0,3	<0,3
ØM-L-5	2016	Diffuse	Lake Mjøsa			Brown trout	Salmo trutta	Liver	60.1	2400		<0,5	<0,5	<0,5	<0,5	<0,5	3.9	12.8	9.6	18.4	3.2	1		<0,2	<0,2	<0,1	<0,2	14.7		<0,2	<0,2	<0,2	0.6	<0,3	<0,3	<5	<5		<0,3	<0,3	<0,3	<0,3	<0,3
ØM-L-6	2016	Diffuse	Lake Mjøsa			Brown trout	Salmo trutta	Liver	63.7	2180		<0,5	<0,5	<0,5	<0,5	<0,5	1.9	6.3	4.9	6.8	1	0.4		<0,2	<0,2	<0,1	<0,2	5.7		<0,2	<0,2	<0,2	0.9	<0,3	<0,3	<5	<5		<0,3	<0,3	<0,3	<0,3	<0,3
ØM-L-7	2016	Diffuse	Lake Mjøsa			Brown trout	Salmo trutta	Liver	52.8	1820		<0,5	<0,5	<0,5	<0,5	<0,5	1.6	4.9	2.8	3.7	0.7	<0,4		<0,2	<0,2	<0,1	<0,2	5.8		<0,2	<0,2	<0,2	1	<0,3	<0,3	<5	<5		<0,3	<0,3	<0,3	<0,3	<0,3
ØM-L-8	2016	Diffuse	Lake Mjøsa			Brown trout	Salmo trutta	Liver	56	2900		<0,5	<0,5	<0,5	<0,5	<0,5	3	10.4	7.5	15.4	3.5	1.6		<0,2	<0,2	<0,1	<0,2	12.4		<0,2	<0,2	<0,2	0.8	<0,3	<0,3	<5	<5		<0,3	<0,3	<0,3	<0,3	<0,3
ØM-L-9	2016	Diffuse	Lake Mjøsa			Brown trout	Salmo trutta	Liver	54.5	1570		<0,5	<0,5	<0,5	<0,5	<0,5	7.3	18.4	11.8	30.3	4.9	1.7		<0,2	<0,2	<0,1	<0,2	19.7		<0,2	<0,2	<0,2	2.9	<0,3	<0,3	<5	<5		<0,3	<0,3	<0,3	<0,3	<0,3
ØM-L-10	2016	Diffuse	Lake Mjøsa			Brown trout	Salmo trutta	Liver	53.5	1780		<0,5	<0,5	<0,5	<0,5	<0,5	<0,5	1.7	1.1	0.9	0.4	<0,4		<0,2	<0,2	<0,1	<0,2	1.9		<0,2	<0,2	<0,2	0.2	<0,3	<0,3	<5	<5		<0,3	<0,3	<0,3	<0,3	<0,3
ØM-L-11	2016	Diffuse	Lake Mjøsa			Brown trout	Salmo trutta	Liver	58.5	2260		<0,5	<0,5	<0,5	<0,5	<0,5	4.5	15.7	9.8	19.2	4.3	1.7		<0,2	<0,2	<0,1	<0,2	17.3		<0,2	<0,2	<0,2	0.2	<0,3	<0,3	<5	<5		<0,3	<0,3	<0,3	<0,3	<0,3
ØM-L-12	2016	Diffuse	Lake Mjøsa			Brown trout	Salmo trutta	Liver	52.7	1670		<0,5	<0,5	<0,5	<0,5	<0,5	5.1	16.6	10.2	20	3.5	1.2		<0,2	<0,2	<0,1	<0,2	19.7		<0,2	<0,2	<0,2	0.9	<0,3	<0,3	<5	<5		<0,3	<0,3	<0,3	<0,3	<0,3
ØF-L-1	2016	Long-range transport, rural	Lake Femunden			Brown trout	Salmo trutta	Liver	38.1	600		<0,5	<0,5	<0,5	<0,5	1.7	2.8	8.9	3.9	22.1	2.3	0.9		<0,2	<0,2	<0,1	<0,2	3.2		<0,2	<0,2	<0,2	<0,1	<0,3	<0,3	<5	<5		<0,3	<0,3	<0,3	<0,3	<0,3
ØF-L-2	2016	Long-range transport, rural	Lake Femunden			Brown trout	Salmo trutta	Liver	43	578		<0,5	<0,5	<0,5	<0,5	<0,5	2.2	15	10.4	64.7	6.3	4.4		<0,2	<0,2	<0,1	<0,2	3.1		<0,2	<0,2	<0,2	<0,1	<0,3	<0,3	<5	<5		<0,3	<0,3	<0,3	<0,3	<0,3
ØF-L-3	2016	Long-range transport, rural	Lake Femunden			Brown trout	Salmo trutta	Liver	39.1	617		<0,5	<0,5	<0,5	<0,5	<0,5	1.1	6.9	3.7	16.1	1.2	0.4		<0,2	<0,2	<0,1	<0,2	1.4		<0,2	<0,2	<0,2	<0,1	<0,3	<0,3	<5	<5		<0,3	<0,3	<0,3	<0,3	<0,3
ØF-L-4	2016	Long-range transport, rural	Lake Femunden			Brown trout	Salmo trutta	Liver	36.5	530		<0,5	<0,5	<0,5	<0,5	<0,5	<0,5	1.5	<0,4	0.7	<0,4	<0,4		<0,2	<0,2	<0,1	<0,2	0.8		<0,2	<0,2	<0,2	<0,1	<0,3	<0,3	<5	<5		<0,3	<0,3	<0,3	<0,3	<0,3
ØF-L-5	2016	Long-range transport, rural	Lake Femunden			Brown trout	Salmo trutta	Liver	40.3	672		<0,5	<0,5	<0,5	<0,5	0.5	3.1	22.9	14.7	92.3	8.3	4.5		<0,2	<0,2	<0,1	<0,2	4		<0,2	<0,2	<0,2	0.7	<0,3	<0,3	<5	<5		<0,3	<0,3	<0,3	<0,3	<0,3
ØF-L-6	2016	Long-range transport, rural	Lake Femunden			Brown trout	Salmo trutta	Liver	41.3	781		<0,5	<0,5	<0,5	<0,5	<0,5	1.5	11.2	6.5	54.8	4.2	3.5		<0,2	<0,2	<0,1	<0,2	2.6		<0,2	<0,2	<0,2	0.6	<0,3	<0,3	<5	<5		<0,3	<0,3	<0,3	<0,3	<0,3
ØF-L-7	2016	Long-range transport, rural	Lake Femunden			Brown trout	Salmo trutta	Liver	39.5	656		<0,5	<0,5	<0,5	<0,5	1.4	2	11	5.6	31.8	2.5	1.9		<0,2	<0,2	<0,1	<0,2	3.2		<0,2	<0,2	<0,2	0.4	<0,3	<0,3	<5	<5		<0,3	<0,3	<0,3	<0,3	<0,3
ØF-L-8	2016	Long-range transport, rural	Lake Femunden			Brown trout	Salmo trutta	Liver	40.3	682		<0,5	<0,5	<0,5	<0,5	<0,5	1.6	9	6.2	50.6	3.7	2.4		<0,2	<0,2	<0,1	<0,2	2.2		<0,2	<0,2	<0,2	0.4	<0,3	<0,3	<5	<5		<0,3	<0,3	<0,3	<0,3	<0,3
ØF-L-9	2016	Long-range transport, rural	Lake Femunden			Brown trout	Salmo trutta	Liver	42.5	837		<0,5	<0,5	<0,5	<0,5	0.6	1.1	2.7	0.5	1.6	<0,4	<0,4		<0,2	<0,2	<0,1	<0,2	0.9		<0,2	<0,2	<0,2	0.1	<0,3	<0,3	<5	<5		<0,3	<0,3	<0,3	<0,3	<0,3
ØF-L-10	2016	Long-range transport, rural	Lake Femunden			Brown trout	Salmo trutta	Liver	41.2	746		<0,5	<0,5	<0,5	<0,5	<0,5	0.9	6.2	3.6	18.3	2.2	1.8		<0,2	<0,2	<0,1	<0,2	1.5		<0,2	<0,2	<0,2	0.3	<0,3	<0,3	<5	<5		<0,3	<0,3	<0,3	<0,3	<0,3
ØF-L-11	2016	Long-range transport, rural	Lake Femunden			Brown trout	Salmo trutta	Liver	43.8	992		<0,5	<0,5	<0,5	<0,5	<0,5	0.6	1.6	<0,4	0.9	<0,4	<0,4		<0,2	<0,2	<0,1	<0,2	0.7		<0,2	<0,2	<0,2	<0,1	<0,3	<0,3	<5	<5		<0,3	<0,3	<0,3	<0,3	<0,3
ØF-L-12	2016	Long-range transport, rural	Lake Femunden			Brown trout	Salmo trutta	Liver	48.6	1128		<0,5	<0,5	<0,5	<0,5	<0,5	2.1	22.6	11.9	68.6	6.7	4.7		<0,2	<0,2	<0,1	<0,2	3.7		<0,2	<0,2	<0,2	0.6	<0,3	<0,3	<5	<5		<0,3	<0,3	<0,3	<0,3	<0,3
KM-L-1	2015	Diffuse	Lake Mjøsa			European smelt	Osmerus eperlanus	Liver	22.1	79		<0,5	<0,5	<0,5	<0,5	1	3.7	9.9	5.1	7.7	1.1			<0,1		<0,1		8.7			<0,2	<0,2	1	<0,3	<0,3	<5	<5		<0,3	<0,3		<0,3	<0,3
KM-L-2	2015	Diffuse	Lake Mjøsa			European smelt	Osmerus eperlanus	Liver	18.95	47.5		<0,5	<0,5	<0,5	<0,5	1	2.5	3.9	2.3	3.5	0.6			<0,1		<0,1		5.2			<0,2	<0,2	0.5	<0,3	<0,3	<5	<5		<0,3	<0,3		<0,3	<0,3
KM-L-3	2015	Diffuse	Lake Mjøsa			European smelt	Osmerus eperlanus	Liver	22.4	82		<0,5	<0,5	<0,5	<0,5	2.2	10.8	21.8	12.3	20.1	2.8			<0,1		<0,1		16.9			<0,2	<0,2	5.3	<0,3	<0,3	<5	<5		<0,3	<0,3		<0,3	<0,3
KM-L-4	2015	Diffuse	Lake Mjøsa			European smelt	Osmerus eperlanus	Liver	17.5	35.5		<0,5	<0,5	<0,5	<0,5	1.5	5.2	12.5	6.3	8.3	1.3			<0,1		<0,1		8.5			0.22	<0,2	0.8	<0,3	<0,3	<5	<5		<0,3	<0,3		<0,3	<0,3
KM-L-5	2015	Diffuse	Lake Mjøsa			European smelt	Osmerus eperlanus	Liver	15.3	19.25		<0,5	<0,5	<0,5	<0,5	1.4	4.2	6	2.9	4.3	0.5			<0,1		<0,1		6.2			<0,2	<0,2	0.4	<0,3	<0,3	<5	<5		<0,3	<0,3		<0,3	<0,3
KM-L-6	2015	Diffuse	Lake Mjøsa			European smelt	Osmerus eperlanus	Liver	13.95	13.25		<0,5	<0,5	<0,5	<0,5	1.4	3.2	9.5	5.8	8.5	1.1			<0,1		<0,1		6.3			<0,2	<0,2	1.3	<0,3	<0,3	<5	<5		<0,3	<0,3		<0,3	<0,3
KM-L-7	2015	Diffuse	Lake Mjøsa			European smelt	Osmerus eperlanus	Liver	12.18	11.2		<0,5	<0,5	<0,5	<0,5	0.9	2.3	6.4	3	4	1			<0,1		<0,1		4.9			<0,2	<0,2	0.4	<0,3	<0,3	<5	<5		<0,3	<0,3		<0,3	<0,3
KM-L-8	2015	Diffuse	Lake Mjøsa			European smelt	Osmerus eperlanus	Liver	13.02	12.1		<0,5	<0,5	<0,5	<0,5	1.1	2.8	6.5	4.5	6.8	1.1			<0,1		<0,1		5.8			<0,2	<0,2	1	<0,3	<0,3	<5	<5		<0,3	<0,3		<0,3	<0,3
KM-L-9	2015	Diffuse	Lake Mjøsa			European smelt	Osmerus eperlanus	Liver	11.1667	9.05556		<0,5	<0,5	<0,5	<0,5	1.4	3.1	7.4	4.4	7	1.1			<0,1		<0,1		5.6			<0,2	<0,2	0.77	<0,3	<0,3	<5	<5		<0,3	<0,3		<0,3	<0,3
KM-L-10	2015	Diffuse	Lake Mjøsa			European smelt	Osmerus eperlanus	Liver	24.2	100		<0,5	<0,5	<0,5	<0,5	2.29	9.3	21.1	14.7	21.2	4.2			<0,1		<0,1		20			0.29	<0,2	3.3	<0,3	<0,3	<5	<5		<0,3	<0,3		<0,3	<0,3
KM-L-11	2015	Diffuse	Lake Mjøsa			European smelt	Osmerus eperlanus	Liver	24.9	107		<0,5	<0,5	<0,5	<0,5	2.4	9.2	21.8	14.5	20.6	4.6			<0,1		<0,1		20.7			0.33	<0,2	4.6	<0,3	<0,3	<5	<5		<0,3	<0,3		<0,3	<0,3
KM-L-12	2015	Diffuse	Lake Mjøsa			European smelt	Osmerus eperlanus	Liver	24.8	98		<0,5	<0,5	<0,5	<0,5	2.5	9.7	23.9	15.9	23.9	4.8			<0,1		<0,1		19.4			0.38	<0,2	3.9	<0,3	<0,3	<5	<5		<0,3	<0,3		<0,3	<0,3
KM-L-13	2015	Diffuse	Lake Mjøsa			European smelt	Osmerus eperlanus	Liver	25	113		<0,5	<0,5	<0,5	<0,5	1.8	7	16.4	10.6	15.4	3.1			<0,1		<0,1		14.2			0.27	<0,2	2.5	<0,3	<0,3	<5	<5		<0,3	<0,3		<0,3	<0,3
KM-L-14	2015	Diffuse	Lake Mjøsa			European smelt	Osmerus eperlanus	Liver	23.5	98		<0,5	<0,5	<0,5	<0,5	3.6	11.1	25.3	15.7	22.7	4.7			<0,1		<0,1		24			0.32	<0,2	4.4	<0,3	<0,3	<5	<5		<0,3	<0,3		<0,3	<0,3
KM-L-15	2015	Diffuse	Lake Mjøsa			European smelt	Osmerus eperlanus	Liver	24.3	103		<0,5	<0,5	<0,5	<0,5	1.3	4.7	11.6	8.1	11.8	2.6			<0,1		<0,1		11.7			<0,2	<0,2	2.3	<0,3	<0,3	<5	<5		<0,3	<0,3		<0,3	<0,3
ØM-L-1	2015	Diffuse	Lake Mjøsa			Brown trout	Salmo trutta	Liver	74	4070		<0,5	<0,5	<0,5	<0,5	0.8	3.8	9.8	5.6	9.9	0.9			<0,1		<0,1		9.61			<0,2	<0,2	1.3	<0,3	<0,3	<5	<5		<0,3	<0,3		<0,3	<0,3
ØM-L-2	2015	Diffuse	Lake Mjøsa			Brown trout	Salmo trutta	Liver	75.2	5350		<0,5	<0,5	<0,5	<0,5	<0,5	0.9	2	1.6	4.2	0.6			<0,1		<0,1		3.8			<0,2	<0,2	0.3	<0,3	<0,3	<5	<5		<0,3	<0,3		<0,3	<0,3
ØM-L-3	2015	Diffuse	Lake Mjøsa			Brown trout	Salmo trutta	Liver	78.8	6650		<0,5	<0,5	<0,5	<0,5	0.9	3.2	6.1	2.7	4.6	0.6			<0,1		<0,1		6.5			<0,2	<0,2	0.9	<0,3	<0,3	<5	<5		<0,3	<0,3		<0,3	<0,3
ØM-L-4	2015	Diffuse	Lake Mjøsa			Brown trout	Salmo trutta	Liver	74.5	5910		<0,5	<0,5	<0,5	<0,5	0.6	4.3	10.3	6.8	10.4	1			<0,1		<0,1		8.2			<0,2	<0,2	1.2	<0,3	<0,3	<5	<5		<0,3	<0,3		<0,3	<0,3
ØM-L-5	2015	Diffuse	Lake Mjøsa			Brown trout	Salmo trutta	Liver	71.5	5180		<0,5	<0,5	<0,5	<0,5	1.1	4.5	11.5	5.8	8	0.8			<0,1		<0,1		10.5			<0,2	<0,2	1.2	<0,3	<0,3	<5	<5		<0,3	<0,3		<0,3	<0,3
ØM-L-6	2015	Diffuse	Lake Mjøsa			Brown trout	Salmo trutta	Liver	78.4	6120		<0,5	<0,5	<0,5	<0,5	0.7	3	6.3	3.4	4.5	0.6			<0,1		<0,1		6.5			<0,2	<0,2	1.4	<0,3	<0,3	<5	<5		<0,3	<0,3		<0,3	<0,3
ØM-L-7	2015	Diffuse	Lake Mjøsa			Brown trout	Salmo trutta	Liver	81.5	6690		<0,5	<0,5	<0,5	<0,5	0.9	5.9	14.6	9.2	14.8	1.7			<0,1		<0,1		12.5			<0,2	<0,2	2.6	<0,3	<0,3	<5	<5		<0,3	<0,3		<0,3	<0,3
ØM-L-8	2015	Diffuse	Lake Mjøsa			Brown trout	Salmo trutta	Liver	91.5	9970		<0,5	<0,5	<0,5	<0,5	<0,5	1.2	1.8	1	1.3	0.2			<0,1		<0,1		2.8			<0,2	<0,2	0.3	<0,3	<0,3	<5	<5		<0,3	<0,3		<0,3	<0,3
ØM-L-9	2015	Diffuse	Lake Mjøsa			Brown trout	Salmo trutta	Liver	83.5	7770		<0,5	<0,5	<0,5	<0,5	0.6	2.7	6.6	3.4	5.7	0.5			<0,1		<0,1		8.5			<0,2	<0,2	0.6	<0,3	<0,3	<5	<5		<0,3	<0,3		<0,3	<0,3
ØM-L-10	2015	Diffuse	Lake Mjøsa			Brown trout	Salmo trutta	Liver	85.5	8220		<0,5	<0,5	<0,5	<0,5	1.1	5.6	14.5	9.7	15.9	1.5			<0,1		<0,1		15			<0,2	<0,2	1.4	<0,3	<0,3	<5	<5		<0,3	<0,3		<0,3	<0,3
ØM-L-11	2015	Diffuse	Lake Mjøsa			Brown trout	Salmo trutta	Liver	58.3	2505		<0,5	<0,5	<0,5	<0,5	0.002	2.2	6.5	4.3	5.3	1.5			<0,1		<0,1		9			<0,2	<0,2	0.7	<0,3	<0,3	<5	<5		<0,3	<0,3		<0,3	<0,3
ØM-L-12	2015	Diffuse	Lake Mjøsa			Brown trout	Salmo trutta	Liver	53.5	1710		<0,5	<0,5	<0,5	<0,5	0.55	2.3	9.7	5.2	6.7	1.7			<0,1		<0,1		8.4			<0,2	<0,2	1.2	<0,3	<0,3	<5	<5		<0,3	<0,3		<0,3	<0,3
ØM-L-13	2015	Diffuse	Lake Mjøsa			Brown trout	Salmo trutta	Liver	54.7	1750		<0,5	<0,5	<0,5	<0,5	<0,5	1.6	4.5	3.4	3.7	1			<0,1		<0,1		5.5			<0,2	<0,2	0.8	<0,3	<0,3	<5	<5		<0,3	<0,3		<0,3	<0,3
ØM-L-14	2015	Diffuse	Lake Mjøsa			Brown trout	Salmo trutta	Liver	83.1	7410		<0,5	<0,5	<0,5	<0,5	<0,5	0.5	0.7	0.5	0.002	<0,4			<0,1		<0,1		1.7			<0,2	<0,2	0.3	<0,3	<0,3	<5	<5		<0,3	<0,3		<0,3	<0,3
ØM-L-15	2015	Diffuse	Lake Mjøsa			Brown trout	Salmo trutta	Liver	51.5	1625		<0,5	<0,5	<0,5	<0,5	<0,5	1.3	5.2	2.9	4.6	1			<0,1		<0,1		5			<0,2	<0,2	0.8	<0,3	<0,3	<5	<5		<0,3	<0,3		<0,3	<0,3
ØF-L-1	2015	Long-range transport, rural	Lake Femunden			Brown trout	Salmo trutta	Liver	36.9	517		<0,5	<0,5	<0,5	<0,5	0.6	1.6	12.5	5.6	18.3	1.7			<0,1		<0,1		3.6			<0,2	<0,2	<0,1	<0,3	<0,3	<5	<5		<0,3	<0,3		<0,3	<0,3
ØF-L-2	2015	Long-range transport, rural	Lake Femunden			Brown trout	Salmo trutta	Liver	36.1	598		<0,5	<0,5	<0,5	<0,5	<0,5	0.7	2.5	0.8	2.1	<0,4			<0,1		<0,1		1.1			<0,2	<0,2	<0,1	<0,3	<0,3	<5	<5		<0,3	<0,3		<0,3	<0,3
ØF-L-3	2015	Long-range transport, rural	Lake Femunden			Brown trout	Salmo trutta	Liver	38.1	615		<0,5	<0,5	<0,5	<0,5	0.6	2.1	13.3	8.9	35.3	5.1			<0,1		<0,1		4			<0,2	<0,2	<0,1	<0,3	<0,3	<5	<5		<0,3	<0,3		<0,3	<0,3
ØF-L-4	2015	Long-range transport, rural	Lake Femunden			Brown trout	Salmo trutta	Liver	38.2	659		<0,5	<0,5	<0,5	<0,5	0.8	0.9	5.4	3.2	13	1.5			<0,1		<0,1		1.8			<0,2	<0,2	<0,1	<0,3	<0,3	<5	<5		<0,3	<0,3		<0,3	<0,3
ØF-L-5	2015	Long-range transport, rural	Lake Femunden			Brown trout	Salmo trutta	Liver	38.7	685		<0,5	<0,5	<0,5	<0,5	0.5	0.5	2.3	0.8	1.7	<0,4			<0,1		<0,1		1.1			<0,2	<0,2	<0,1	<0,3	<0,3	<5	<5		<0,3	<0,3		<0,3	<0,3
ØF-L-6	2015	Long-range transport, rural	Lake Femunden			Brown trout	Salmo trutta	Liver	41.6	739		<0,5	<0,5	<0,5	<0,5	0.9	1.8	14.8	9	47.2	5.5			<0,1		<0,1		3.9			<0,2	<0,2	<0,1	<0,3	<0,3	<5	<5		<0,3	<0,3		<0,3	<0,3
ØF-L-7	2015	Long-range transport, rural	Lake Femunden			Brown trout	Salmo trutta	Liver	40.2	700		<0,5	<0,5	<0,5	<0,5	0.5	2	13.3	8.9	47.5	3.5			<0,1		<0,1		3.7			<0,2	<0,2	<0,1	<0,3	<0,3	<5	<5		<0,3	<0,3		<0,3	<0,3
ØF-L-8	2015	Long-range transport, rural	Lake Femunden			Brown trout	Salmo trutta	Liver	41.5	764		<0,5	<0,5	<0,5	<0,5	0.6	2	13.2	7.9	46.1	6.1			<0,1		<0,1		5.2			<0,2	<0,2	0.5	<0,3	<0,3	<5	<5		<0,3	<0,3		<0,3	<0,3
ØF-L-9	2015	Long-range transport, rural	Lake Femunden			Brown trout	Salmo trutta	Liver	41.4	767		<0,5	<0,5	<0,5	<0,5	<0,5	1.6	8.1	5.9	34.3	3.6			<0,1		<0,1		2.9			<0,2	<0,2	0.8	<0,3	<0,3	<5	<5		<0,3	<0,3		<0,3	<0,3
ØF-L-10	2015	Long-range transport, rural	Lake Femunden			Brown trout	Salmo trutta	Liver	40.6	795		<0,5	<0,5	<0,5	<0,5	<0,5	1.1	4.9	2.2	13.7	1			<0,1		<0,1		1.7			<0,2	<0,2	0.2	<0,3	<0,3	<5	<5		<0,3	<0,3		<0,3	<0,3
ØF-L-11	2015	Long-range transport, rural	Lake Femunden			Brown trout	Salmo trutta	Liver	44	889		<0,5	<0,5	<0,5	<0,5	0.6	0.9	4.5	2.3	17.7	1.6			<0,1		<0,1		1.9			<0,2	<0,2	0.4	<0,3	<0,3	<5	<5		<0,3	<0,3		<0,3	<0,3
ØF-L-12	2015	Long-range transport, rural	Lake Femunden			Brown trout	Salmo trutta	Liver	40.5	756		<0,5	<0,5	<0,5	<0,5	1.4	1.9	10.8	7.2	51.4	<0,4			<0,1		<0,1		4.5			<0,2	<0,2	0.6	<0,3	<0,3	<5	<5		<0,3	<0,3		<0,3	<0,3
KM-L-1	2014	Diffuse	Lake Mjøsa			European smelt	Osmerus eperlanus	Liver	12.1789	9.07778		<1	<0,5	<0,5	<0,5	<0,5	2.7	7.4	4.2	9.1	2.7			<0,1		<0,1		5.5			<0,2	<0,2	0.5	<0,3	<0,3	<5	<5		<0,3	<0,3		<0,3
KM-L-2	2014	Diffuse	Lake Mjøsa			European smelt	Osmerus eperlanus	Liver	12.78	10.7		<1	<0,5	<0,5	<0,5	0.6	3.1	9.1	3.6	7.1	2.1			<0,1		<0,1		6.5			<0,2	<0,2	0.6	<0,3	<0,3	<5	<5		<0,3	<0,3		<0,3
KM-L-3	2014	Diffuse	Lake Mjøsa			European smelt	Osmerus eperlanus	Liver	13.0286	11.7143		<1	<0,5	<0,5	<0,5	1	4	6.1	2.1	5.8	1.7			<0,1		<0,1		4.1			<0,2	<0,2	0.4	<0,3	<0,3	<5	<5		<0,3	<0,3		<0,3
KM-L-4	2014	Diffuse	Lake Mjøsa			European smelt	Osmerus eperlanus	Liver	13.9143	15.9571		<1	<0,5	<0,5	<0,5	1.5	4.6	13.9	6	10.5	2.2			<0,1		<0,1		7.2			<0,2	<0,2	1	<0,3	<0,3	<5	<5		<0,3	<0,3		<0,3
KM-L-5	2014	Diffuse	Lake Mjøsa			European smelt	Osmerus eperlanus	Liver	15.35	21.575		<1	<0,5	<0,5	<0,5	1.1	5.9	9	5	6.3	2.3			<0,1		<0,1		4.5			<0,2	<0,2	0.6	<0,3	<0,3	<5	<5		<0,3	<0,3		<0,3
KM-L-6	2014	Diffuse	Lake Mjøsa			European smelt	Osmerus eperlanus	Liver	20.5	57.4		<1	<0,5	<0,5	<0,5	0.6	3.3	3.9	2.9	5.1	2.3			<0,1		<0,1		2.9			<0,2	<0,2	0.2	<0,3	<0,3	<5	<5		<0,3	<0,3		<0,3
KM-L-7	2014	Diffuse	Lake Mjøsa			European smelt	Osmerus eperlanus	Liver	19.7	45.2		<1	<0,5	<0,5	<0,5	1.1	6.3	7.3	4.3	5.8	1.8			<0,1		<0,1		5.5			<0,2	<0,2	0.8	<0,3	<0,3	<5	<5		<0,3	<0,3		<0,3
LM-L-1	2014	Diffuse	Lake Mjøsa			Vendace	Coregonus albula	Liver	20.5	80		<1	<0,5	<0,5	<0,5	<0,5	1.1	0.9	1.3	1.4	1.3			<0,1		<0,1		2.7			<0,2	<0,2	0.1	<0,3	<0,3	<5	<5		<0,3	<0,3		<0,3
LM-L-2	2014	Diffuse	Lake Mjøsa			Vendace	Coregonus albula	Liver	21.3	90		<1	<0,5	<0,5	<0,5	0.8	3	1.8	1.2	2.8	1.6			<0,1		<0,1		17.4			<0,2	<0,2	0.3	<0,3	<0,3	<5	<5		<0,3	<0,3		<0,3
LM-L-3	2014	Diffuse	Lake Mjøsa			Vendace	Coregonus albula	Liver	19.4	67		<1	<0,5	<0,5	<0,5	<0,5	2.8	1.5	1.8	2.8	0.7			<0,1		<0,1		2.5			<0,2	<0,2	0.3	<0,3	<0,3	<5	<5		<0,3	<0,3		<0,3
LM-L-4	2014	Diffuse	Lake Mjøsa			Vendace	Coregonus albula	Liver	20.5	70		<1	<0,5	<0,5	<0,5	<0,5	0.9	2	1.5	1.7	1			<0,1		<0,1		3.4			<0,2	<0,2	0.2	<0,3	<0,3	<5	<5		<0,3	<0,3		<0,3
LM-L-5	2014	Diffuse	Lake Mjøsa			Vendace	Coregonus albula	Liver	23.3	90		<1	<0,5	<0,5	<0,5	0.7	1.9	2.5	1.7	3.7	1			<0,1		<0,1		3.7			<0,2	<0,2	0.3	<0,3	<0,3	<5	<5		<0,3	<0,3		<0,3
LM-L-6	2014	Diffuse	Lake Mjøsa			Vendace	Coregonus albula	Liver	21.5	78		<1	<0,5	<0,5	<0,5	0.7	2.3	2.4	2.2	4.3	1.4			<0,1		<0,1		8			<0,2	<0,2	0.2	<0,3	<0,3	<5	<5		<0,3	<0,3		<0,3
LM-L-7	2014	Diffuse	Lake Mjøsa			Vendace	Coregonus albula	Liver	19.5	59		<1	<0,5	<0,5	<0,5	1.1	3.9	2.5	1.5	2.2	1.3			<0,1		<0,1		4.6			<0,2	<0,2	0.4	<0,3	<0,3	<5	<5		<0,3	<0,3		<0,3
LM-L-8	2014	Diffuse	Lake Mjøsa			Vendace	Coregonus albula	Liver	20.3	70		<1	<0,5	<0,5	<0,5	1	1.9	4.7	2.6	6.1	1.9			<0,1		<0,1		7.1			<0,2	<0,2	0.3	<0,3	<0,3	<5	<5		<0,3	<0,3		<0,3
LM-L-9	2014	Diffuse	Lake Mjøsa			Vendace	Coregonus albula	Liver	21.1	68		<1	<0,5	<0,5	<0,5	<0,5	1.3	1.9	0.8	1.4	1			<0,1		<0,1		1.7			<0,2	<0,2	0.2	<0,3	<0,3	<5	<5		<0,3	<0,3		<0,3
ØM-L-1	2014	Diffuse	Lake Mjøsa			Brown trout	Salmo trutta	Liver	76	5450		<1	<0,5	<0,5	<0,5	0.7	4.4	17.1	11.6	38.5	6.3			<0,1		<0,1		16.6			0.2	<0,2	1.3	<0,3	<0,3	<5	<5		<0,3	<0,3		<0,3
ØM-L-2	2014	Diffuse	Lake Mjøsa			Brown trout	Salmo trutta	Liver	82	6275		<1	<0,5	<0,5	<0,5	<0,5	1	6.4	3.6	5.6	1.4			<0,1		<0,1		6.3			<0,2	<0,2	0.3	<0,3	<0,3	<5	<5		<0,3	<0,3		0.7
ØM-L-3	2014	Diffuse	Lake Mjøsa			Brown trout	Salmo trutta	Liver	82.5	5780		<1	<0,5	<0,5	<0,5	<0,5	2.3	7.2	3	6.5	1.6			<0,1		<0,1		7			<0,2	<0,2	0.7	<0,3	<0,3	<5	<5		<0,3	<0,3		4.2
ØM-L-4	2014	Diffuse	Lake Mjøsa			Brown trout	Salmo trutta	Liver	79	5225		<1	<0,5	<0,5	<0,5	0.7	3.1	13.9	10.1	17.5	2.1			<0,1		<0,1		15.9			0.2	<0,2	0.7	<0,3	<0,3	<5	<5		<0,3	<0,3		<0,3
ØM-L-5	2014	Diffuse	Lake Mjøsa			Brown trout	Salmo trutta	Liver	69	3500		<1	<0,5	<0,5	<0,5	1.6	6.7	24.1	19.8	70.5	5.8			<0,1		<0,1		23.5			0.2	<0,2	1.2	<0,3	<0,3	<5	<5		<0,3	<0,3		<0,3
ØM-L-6	2014	Diffuse	Lake Mjøsa			Brown trout	Salmo trutta	Liver	64.5	2350		<1	<0,5	<0,5	<0,5	<0,5	<0,5	0.6	0.3	1.3	1			<0,1		<0,1		1.4			<0,2	<0,2	0.5	<0,3	<0,3	<5	<5		<0,3	<0,3		<0,3
ØM-L-7	2014	Diffuse	Lake Mjøsa			Brown trout	Salmo trutta	Liver	62.5	3250		<1	<0,5	<0,5	<0,5	1.1	5.5	17.6	10.9	32.5	2.7			<0,1		<0,1		17.5			<0,2	<0,2	0.7	<0,3	<0,3	<5	<5		<0,3	<0,3		<0,3
ØM-L-8	2014	Diffuse	Lake Mjøsa			Brown trout	Salmo trutta	Liver	59	2650		<1	<0,5	<0,5	<0,5	<0,5	1.4	2.4	1.8	2.2	1.4			<0,1		<0,1		3.1			<0,2	<0,2	0.9	<0,3	<0,3	<5	<5		<0,3	<0,3		<0,3
ØM-L-9	2014	Diffuse	Lake Mjøsa			Brown trout	Salmo trutta	Liver	74.5	4005		<1	<0,5	<0,5	<0,5	1.2	9.4	26.5	20.4	63.9	8.8			<0,1		<0,1		24.1			0.2	<0,2	0.8	<0,3	<0,3	<5	<5		<0,3	<0,3		<0,3
ØM-L-10	2014	Diffuse	Lake Mjøsa			Brown trout	Salmo trutta	Liver	76	5350		<1	<0,5	<0,5	<0,5	0.002	0.7	4.1	3	4.7	2.6			<0,1		<0,1		5.1			<0,2	<0,2	0.3	<0,3	<0,3	<5	<5		<0,3	<0,3		<0,3
ØM-L-11	2014	Diffuse	Lake Mjøsa			Brown trout	Salmo trutta	Liver	76.5	5450		<1	<0,5	<0,5	<0,5	0.5	2.3	11.4	7.6	19	2.6			<0,1		<0,1		9.4			<0,2	<0,2	0.6	<0,3	<0,3	<5	<5		<0,3	<0,3		<0,3
ØM-L-12	2014	Diffuse	Lake Mjøsa			Brown trout	Salmo trutta	Liver	69	5010		<1	<0,5	<0,5	<0,5	0.5	0.9	3.4	2	4.4	1.2			<0,1		<0,1		3.4			<0,2	<0,2	0.4	<0,3	<0,3	<5	<5		<0,3	<0,3		<0,3
ØF-L-1	2014	Long-range transport, rural	Lake Femunden			Brown trout	Salmo trutta	Liver	39.7	623		<1	<0,5	<0,5	<0,5	0.9	2.2	12.7	7.2	75.8	3.6			<0,1		<0,1		2.9			<0,2	<0,2	0.5	<0,3	<0,3	<5	<5		<0,3	<0,3		<0,3
ØF-L-2	2014	Long-range transport, rural	Lake Femunden			Brown trout	Salmo trutta	Liver	39.8	694		<1	<0,5	<0,5	<0,5	<0,5	1.7	1.5	0.6	1.1	0.4			<0,1		<0,1		0.5			<0,2	<0,2	0.3	<0,3	<0,3	<5	<5		<0,3	<0,3		<0,3
ØF-L-3	2014	Long-range transport, rural	Lake Femunden			Brown trout	Salmo trutta	Liver	38.8	622		<1	<0,5	<0,5	<0,5	0.7	3.1	29.1	15.3	89.5	3.2			<0,1		<0,1		3.3			<0,2	<0,2	1.3	<0,3	<0,3	<5	<5		<0,3	<0,3		<0,3
ØF-L-4	2014	Long-range transport, rural	Lake Femunden			Brown trout	Salmo trutta	Liver	39.5	631		<1	<0,5	<0,5	<0,5	<0,5	2.8	19.3	10.9	101.8	3.1			<0,1		<0,1		2.3			<0,2	<0,2	1	<0,3	<0,3	<5	<5		<0,3	<0,3		<0,3
ØF-L-5	2014	Long-range transport, rural	Lake Femunden			Brown trout	Salmo trutta	Liver	47.3	947		<1	<0,5	<0,5	<0,5	1.6	2.3	5.7	1.6	7.5	1.4			<0,1		<0,1		1.6			<0,2	<0,2	0.9	<0,3	<0,3	<5	<5		<0,3	<0,3		<0,3
ØF-L-6	2014	Long-range transport, rural	Lake Femunden			Brown trout	Salmo trutta	Liver	58.9	1229		<1	<0,5	<0,5	<0,5	1.3	4.1	18.8	7.6	44.4	2.5			<0,1		<0,1		3.9			<0,2	<0,2	1.7	<0,3	<0,3	<5	<5		<0,3	<0,3		<0,3
ØF-L-7	2014	Long-range transport, rural	Lake Femunden			Brown trout	Salmo trutta	Liver	58	1620		<1	<0,5	<0,5	<0,5	0.7	4.7	29.3	21	163.1	6.5			<0,1		<0,1		5			<0,2	<0,2	1	<0,3	<0,3	<5	<5		<0,3	<0,3		<0,3
ØF-L-8	2014	Long-range transport, rural	Lake Femunden			Brown trout	Salmo trutta	Liver	43.6	1025		<1	<0,5	<0,5	<0,5	1.4	5.3	38.5	25.1	163.4	12.7			<0,1		<0,1		6.3			<0,2	<0,2	1.1	<0,3	<0,3	<5	<5		<0,3	<0,3		<0,3
ØF-L-9	2014	Long-range transport, rural	Lake Femunden			Brown trout	Salmo trutta	Liver	43.2	828		<1	<0,5	<0,5	<0,5	0.8	3.5	19.9	9	60.1	3.4			<0,1		<0,1		3.9			<0,2	<0,2	0.4	<0,3	<0,3	<5	<5		<0,3	<0,3		<0,3
ØF-L-10	2014	Long-range transport, rural	Lake Femunden			Brown trout	Salmo trutta	Liver	43.5	875		<1	<0,5	<0,5	<0,5	0.6	3	15.2	8.8	118.1	4.3			<0,1		<0,1		3.3			<0,2	<0,2	0.3	<0,3	<0,3	<5	<5		<0,3	<0,3		<0,3
ØF-L-11	2014	Long-range transport, rural	Lake Femunden			Brown trout	Salmo trutta	Liver	41	760		<1	<0,5	<0,5	<0,5	<0,5	2.6	12.7	6.5	36.2	2			<0,1		<0,1		2			<0,2	<0,2	0.6	<0,3	<0,3	<5	<5		<0,3	<0,3		<0,3
ØF-L-12	2014	Long-range transport, rural	Lake Femunden			Brown trout	Salmo trutta	Liver	45.1	945		<1	<0,5	<0,5	<0,5	0.6	5.5	24.7	29.1	189.5	10.5			<0,1		<0,1		6.3			<0,2	<0,2	1.4	<0,3	<0,3	<5	<5		<0,3	<0,3		<0,3
ØM-L-1	2017	Diffuse	Lake Mjøsa			Brown trout	Salmo trutta	Liver	81.5	6190		<0,5	<0,5	<0,5	<0,5	<0,5	3.52	10.9	6.51	14.1	2.97	1.18	<0,5	<0,1	<0,1	<0,1	<0,1	8.2		<0,1	<0,1	<0,2	0.22	<0,3	<0,3	<5	<5		<0,3	<0,3	<0,3	<0,3	<0,3
ØM-L-2	2017	Diffuse	Lake Mjøsa			Brown trout	Salmo trutta	Liver	76.2	5630		<0,5	<0,5	<0,5	<0,5	<0,5	1.16	1.83	1.07	1.45	0.45	<0,4	<0,5	<0,1	<0,1	<0,1	<0,1	1.84		<0,1	<0,1	<0,2	0.17	<0,3	<0,3	<5	<5		<0,3	<0,3	<0,3	<0,3	<0,3
ØM-L-3	2017	Diffuse	Lake Mjøsa			Brown trout	Salmo trutta	Liver	68.3	4020		<0,5	<0,5	<0,5	<0,5	<0,5	2.6	7.97	5.38	7.87	2.15	1.08	<0,5	<0,1	<0,1	<0,1	<0,1	6.68		<0,1	<0,1	<0,2	0.31	<0,3	<0,3	<5	<5		<0,3	<0,3	<0,3	<0,3	<0,3
ØM-L-4	2017	Diffuse	Lake Mjøsa			Brown trout	Salmo trutta	Liver	56.3	2130		<0,5	<0,5	<0,5	<0,5	<0,5	3.21	9.92	5.79	8.83	2.52	0.99	<0,5	<0,1	<0,1	<0,1	<0,1	6.46		<0,1	<0,1	<0,2	0.45	<0,3	<0,3	<5	<5		<0,3	<0,3	<0,3	<0,3	<0,3
ØM-L-5	2017	Diffuse	Lake Mjøsa			Brown trout	Salmo trutta	Liver	64.2	2580		<0,5	<0,5	<0,5	<0,5	<0,5	1.98	4.96	3.29	5.23	1.6	0.79	<0,5	<0,1	<0,1	<0,1	<0,1	4.03		<0,1	<0,1	<0,2	0.37	<0,3	<0,3	<5	<5		<0,3	<0,3	<0,3	<0,3	<0,3
ØM-L-6	2017	Diffuse	Lake Mjøsa			Brown trout	Salmo trutta	Liver	74.3	3560		<0,5	<0,5	<0,5	<0,5	<0,5	0.33	0.87	0.97	1.55	0.63	0.43	<0,5	<0,1	<0,1	<0,1	<0,1	1.51		<0,1	<0,1	<0,2	0.15	<0,3	<0,3	<5	<5		<0,3	<0,3	<0,3	<0,3	<0,3
ØM-L-7	2017	Diffuse	Lake Mjøsa			Brown trout	Salmo trutta	Liver	57.6	2560		<0,5	<0,5	<0,5	<0,5	<0,5	1.76	5.34	3.36	5.05	1.36	0.52	<0,5	<0,1	<0,1	<0,1	<0,1	3.13		<0,1	<0,1	<0,2	0.22	<0,3	<0,3	<5	<5		<0,3	<0,3	<0,3	<0,3	<0,3
ØM-L-8	2017	Diffuse	Lake Mjøsa			Brown trout	Salmo trutta	Liver	61.5	3040		<0,5	<0,5	<0,5	<0,5	<0,5	2.84	9.5	5.26	9.35	2.06	0.76	<0,5	<0,1	<0,1	<0,1	<0,1	6.41		<0,1	<0,1	<0,2	0.55	<0,3	<0,3	<5	<5		<0,3	<0,3	<0,3	<0,3	<0,3
ØM-L-9	2017	Diffuse	Lake Mjøsa			Brown trout	Salmo trutta	Liver	56.5	2300		<0,5	<0,5	<0,5	<0,5	0.69	6.55	16.8	8.62	13.7	3.51	1.54	<0,5	<0,1	<0,1	<0,1	<0,1	11.4		<0,1	<0,1	<0,2	0.27	<0,3	<0,3	<5	<5		<0,3	<0,3	<0,3	<0,3	<0,3
ØM-L-10	2017	Diffuse	Lake Mjøsa			Brown trout	Salmo trutta	Liver	64.1	2980		<0,5	<0,5	<0,5	<0,5	0.68	4.85	15.6	9.83	19.8	4.76	1.81	<0,5	<0,1	<0,1	<0,1	<0,1	10.5		<0,1	<0,1	<0,2	0.81	<0,3	<0,3	<5	<5		<0,3	<0,3	<0,3	<0,3	<0,3
ØM-L-11	2017	Diffuse	Lake Mjøsa			Brown trout	Salmo trutta	Liver	66.8	3200		<0,5	<0,5	<0,5	<0,5	0.54	3.64	11.9	6.71	11.3	2.49	1.05	<0,5	<0,1	<0,1	<0,1	<0,1	6.9		<0,1	<0,1	<0,2	0.4	<0,3	<0,3	<5	<5		<0,3	<0,3	<0,3	<0,3	<0,3
ØM-L-12	2017	Diffuse	Lake Mjøsa			Brown trout	Salmo trutta	Liver	63.6	3040		<0,5	<0,5	<0,5	<0,5	<0,5	2.65	7.73	4.96	8.62	1.91	0.91	<0,5	<0,1	<0,1	<0,1	<0,1	6.28		<0,1	<0,1	<0,2	0.24	<0,3	<0,3	<5	<5		<0,3	<0,3	<0,3	<0,3	<0,3
ØM-L-13	2017	Diffuse	Lake Mjøsa			Brown trout	Salmo trutta	Liver	62.3	3020		<0,5	<0,5	<0,5	<0,5	<0,5	0.98	1.93	1.34	1.66	0.46	<0,4	<0,5	<0,1	<0,1	<0,1	<0,1	1.77		<0,1	<0,1	<0,2	0.14	<0,3	<0,3	<5	<5		<0,3	<0,3	<0,3	<0,3	<0,3
ØM-L-14	2017	Diffuse	Lake Mjøsa			Brown trout	Salmo trutta	Liver	57.5	2440		<0,5	<0,5	<0,5	<0,5	<0,5	1.85	4.51	3.23	4.3	1.23	0.74	<0,5	<0,1	<0,1	<0,1	<0,1	3.92		<0,1	<0,1	<0,2	0.3	<0,3	<0,3	<5	<5		<0,3	<0,3	<0,3	<0,3	<0,3
ØM-L-15	2017	Diffuse	Lake Mjøsa			Brown trout	Salmo trutta	Liver	69.5	4170		<0,5	<0,5	<0,5	<0,5	<0,5	1.38	2.36	1.58	2.12	0.49	<0,4	<0,5	<0,1	<0,1	<0,1	<0,1	2.48		<0,1	<0,1	<0,2	0.34	<0,3	<0,3	<5	<5		<0,3	<0,3	<0,3	<0,3	<0,3
KM-L-1	2017	Diffuse	Lake Mjøsa			European smelt	Osmerus eperlanus	Liver	14.475	19.7		<0,5	<0,5	<0,5	1.59	0.94	1.29	2.61	2.31	3.19	0.76	<0,4	<0,5	<0,1	<0,1	<0,1	<0,1	1.55		<0,1	<0,1	<0,2	0.2	<0,3	<0,3	<5	<5		<0,3	<0,3	<0,3	<0,3	<0,3
KM-L-2	2017	Diffuse	Lake Mjøsa			European smelt	Osmerus eperlanus	Liver	10.375	5.4		<0,5	<0,5	<0,5	0.85	1.32	1.74	3.22	2.69	3.21	1.38	<0,4	<0,5	<0,1	<0,1	<0,1	<0,1	2.02		0.2	<0,1	<0,2	0.3	<0,3	<0,3	<5	<5		<0,3	<0,3	<0,3	<0,3	<0,3
KM-L-3	2017	Diffuse	Lake Mjøsa			European smelt	Osmerus eperlanus	Liver	24.5	109		<0,5	<0,5	<0,5	1.07	1.41	4.28	11.2	6.65	8.84	2.26	1.3	<0,5	<0,1	<0,1	<0,1	<0,1	8.13		<0,1	<0,1	<0,2	0.9	<0,3	<0,3	<5	<5		<0,3	<0,3	<0,3	<0,3	<0,3
KM-L-4	2017	Diffuse	Lake Mjøsa			European smelt	Osmerus eperlanus	Liver	23	72.6		<0,5	<0,5	<0,5	1.03	1.27	4.96	14.9	8.42	10.3	2.33	1.1	<0,5	0.13	<0,1	<0,1	0.78	8.92		<0,1	<0,1	<0,2	2.04	<0,3	<0,3	<5	<5		<0,3	<0,3	<0,3	<0,3	<0,3
KM-L-5	2017	Diffuse	Lake Mjøsa			European smelt	Osmerus eperlanus	Liver	12.28	10.3		<0,5	<0,5	<0,5	1.16	0.96	1.47	2.97	2.28	3.04	1.02	<0,4	<0,5	0.53	<0,1	<0,1	<0,1	1.62		<0,1	<0,1	<0,2	0.36	<0,3	<0,3	<5	<5		<0,3	<0,3	<0,3	<0,3	<0,3
KM-L-6	2017	Diffuse	Lake Mjøsa			European smelt	Osmerus eperlanus	Liver	13.84	14.9		<0,5	<0,5	<0,5	0.76	0.64	1.45	3.16	2.44	3.12	1.06	<0,4	<0,5	<0,1	<0,1	<0,1	<0,1	1.75		<0,1	<0,1	<0,2	0.34	<0,3	<0,3	<5	<5		<0,3	<0,3	<0,3	<0,3	<0,3
KM-L-7	2017	Diffuse	Lake Mjøsa			European smelt	Osmerus eperlanus	Liver	13.3	12.8		<0,5	<0,5	<0,5	1.19	0.89	1.58	2.75	2.06	2.76	0.67	<0,4	<0,5	<0,1	<0,1	<0,1	<0,1	1.33		<0,1	<0,1	<0,2	0.31	<0,3	<0,3	<5	<5		<0,3	<0,3	<0,3	<0,3	<0,3
KM-L-8	2017	Diffuse	Lake Mjøsa			European smelt	Osmerus eperlanus	Liver	17.15	34.4		<0,5	<0,5	<0,5	2.62	0.86	2.19	3.9	3.05	4.25	1.4	<0,4	<0,5	<0,1	<0,1	<0,1	1.18	3.26		<0,1	<0,1	<0,2	0.31	<0,3	<0,3	<5	<5		<0,3	<0,3	<0,3	<0,3	<0,3
KM-L-9	2017	Diffuse	Lake Mjøsa			European smelt	Osmerus eperlanus	Liver	14.975	19.7		<0,5	<0,5	<0,5	0.71	0.67	1.35	3.04	2.48	3.35	1.02	<0,4	<0,5	<0,1	<0,1	<0,1	<0,1	2.41		<0,1	<0,1	<0,2	0.33	<0,3	<0,3	<5	<5		<0,3	<0,3	<0,3	<0,3	<0,3
KM-L-10	2017	Diffuse	Lake Mjøsa			European smelt	Osmerus eperlanus	Liver	20.8	58		<0,5	<0,5	<0,5	<0,5	0.59	2.16	4.31	3.3	3.52	1.2	<0,4	<0,5	<0,1	<0,1	<0,1	<0,1	4.26		<0,1	<0,1	<0,2	0.36	<0,3	<0,3	<5	<5		<0,3	<0,3	<0,3	<0,3	<0,3
LM-L-1	2017	Diffuse	Lake Mjøsa			Vendace	Coregonus albula	Liver	17.75	45		<0,5	<0,5	<0,5	<0,5	0.91	<0,5	0.59	0.52	0.6	<0,4	<0,4	<0,5	<0,1	<0,1	<0,1	<0,1	0.35		<0,1	<0,1	<0,2	<0,1	<0,3	<0,3	<5	<5		<0,3	<0,3	<0,3	<0,3	<0,3
LM-L-2	2017	Diffuse	Lake Mjøsa			Vendace	Coregonus albula	Liver	18.05	45		<0,5	<0,5	<0,5	<0,5	<0,5	<0,5	0.47	0.52	0.81	<0,4	<0,4	<0,5	<0,1	<0,1	<0,1	<0,1	0.53		<0,1	<0,1	<0,2	<0,1	<0,3	<0,3	<5	<5		<0,3	<0,3	<0,3	<0,3	<0,3
LM-L-3	2017	Diffuse	Lake Mjøsa			Vendace	Coregonus albula	Liver	17.85	43.5		<0,5	<0,5	<0,5	<0,5	<0,5	<0,5	0.84	0.75	0.97	<0,4	<0,4	<0,5	<0,1	<0,1	<0,1	<0,1	0.56		<0,1	<0,1	<0,2	<0,1	<0,3	<0,3	<5	<5		<0,3	<0,3	<0,3	<0,3	<0,3
LM-L-4	2017	Diffuse	Lake Mjøsa			Vendace	Coregonus albula	Liver	18	49		<0,5	<0,5	<0,5	<0,5	<0,5	0.51	1.08	0.87	1.04	<0,4	<0,4	<0,5	<0,1	<0,1	<0,1	<0,1	3.75		<0,1	<0,1	<0,2	<0,1	<0,3	<0,3	<5	<5		<0,3	<0,3	<0,3	<0,3	<0,3
LM-L-5	2017	Diffuse	Lake Mjøsa			Vendace	Coregonus albula	Liver	20.2	59		<0,5	<0,5	<0,5	<0,5	<0,5	<0,5	0.61	0.55	0.84	<0,4	<0,4	<0,5	<0,1	<0,1	<0,1	<0,1	1.04		<0,1	<0,1	<0,2	<0,1	<0,3	<0,3	<5	<5		<0,3	<0,3	<0,3	<0,3	<0,3
LM-L-6	2017	Diffuse	Lake Mjøsa			Vendace	Coregonus albula	Liver	17.8	51		<0,5	<0,5	<0,5	<0,5	<0,5	<0,5	0.76	0.55	0.88	<0,4	<0,4	<0,5	<0,1	<0,1	<0,1	<0,1	0.9		<0,1	<0,1	<0,2	<0,1	<0,3	<0,3	<5	<5		<0,3	<0,3	<0,3	<0,3	<0,3
LM-L-7	2017	Diffuse	Lake Mjøsa			Vendace	Coregonus albula	Liver	17.5	43		<0,5	<0,5	<0,5	<0,5	0.5	0.59	1.04	0.91	1.15	<0,4	<0,4	<0,5	<0,1	<0,1	<0,1	<0,1	1.3		<0,1	<0,1	<0,2	<0,1	<0,3	<0,3	<5	<5		<0,3	<0,3	<0,3	<0,3	<0,3
LM-L-8	2017	Diffuse	Lake Mjøsa			Vendace	Coregonus albula	Liver	16.65	41		<0,5	<0,5	<0,5	<0,5	0.55	<0,5	0.79	0.95	1.43	<0,4	<0,4	<0,5	<0,1	<0,1	<0,1	<0,1	0.99		<0,1	<0,1	<0,2	<0,1	<0,3	<0,3	<5	<5		<0,3	<0,3	<0,3	<0,3	<0,3
LM-L-9	2017	Diffuse	Lake Mjøsa			Vendace	Coregonus albula	Liver	17	41.5		<0,5	<0,5	<0,5	<0,5	<0,5	<0,5	0.81	0.73	1.22	<0,4	<0,4	<0,5	<0,1	<0,1	<0,1	<0,1	1.01		<0,1	<0,1	<0,2	<0,1	<0,3	<0,3	<5	<5		<0,3	<0,3	<0,3	<0,3	<0,3
LM-L-10	2017	Diffuse	Lake Mjøsa			Vendace	Coregonus albula	Liver	18.7	52		<0,5	<0,5	<0,5	<0,5	<0,5	<0,5	0.67	0.63	0.79	<0,4	<0,4	<0,5	<0,1	<0,1	<0,1	<0,1	0.79		<0,1	<0,1	<0,2	<0,1	<0,3	<0,3	<5	<5		<0,3	<0,3	<0,3	<0,3	<0,3
ØF-L-1	2017	Long-range transport, rural	Lake Femunden			Brown trout	Salmo trutta	Liver	42.5	848		<0,5	<0,5	<0,5	<0,5	0.9	1.54	9.56	6.04	33.3	4.38	4.05	<0,5	<0,1	<0,1	<0,1	<0,1	2.22		<0,1	<0,1	<0,2	0.25	<0,3	<0,3	<5	<5		<0,3	<0,3	<0,3	<0,3	<0,3
ØF-L-2	2017	Long-range transport, rural	Lake Femunden			Brown trout	Salmo trutta	Liver	44.6	1007		<0,5	<0,5	<0,5	<0,5	<0,5	0.64	2.57	1.45	7.58	1.35	1.27	<0,5	<0,1	<0,1	<0,1	<0,1	1		<0,1	<0,1	<0,2	0.17	<0,3	<0,3	<5	<5		<0,3	<0,3	<0,3	<0,3	<0,3
ØF-L-3	2017	Long-range transport, rural	Lake Femunden			Brown trout	Salmo trutta	Liver	36.6	485		<0,5	<0,5	<0,5	<0,5	0.63	1.31	6.22	3.82	19.1	2.42	1.97	<0,5	<0,1	<0,1	<0,1	<0,1	1.75		<0,1	<0,1	<0,2	0.45	<0,3	<0,3	<5	<5		<0,3	<0,3	<0,3	<0,3	<0,3
ØF-L-4	2017	Long-range transport, rural	Lake Femunden			Brown trout	Salmo trutta	Liver	39.4	639		<0,5	<0,5	<0,5	<0,5	<0,5	1.3	9.78	5.76	30	3.52	3.27	<0,5	<0,1	<0,1	<0,1	<0,1	1.86		<0,1	<0,1	<0,2	0.52	<0,3	<0,3	<5	<5		<0,3	<0,3	<0,3	<0,3	<0,3
ØF-L-5	2017	Long-range transport, rural	Lake Femunden			Brown trout	Salmo trutta	Liver	44.3	1072		<0,5	<0,5	<0,5	<0,5	0.5	1.44	9.5	5.63	35	3.74	2.99	<0,5	<0,1	<0,1	<0,1	<0,1	1.94		<0,1	<0,1	<0,2	0.65	<0,3	<0,3	<5	<5		<0,3	<0,3	<0,3	<0,3	<0,3
ØF-L-6	2017	Long-range transport, rural	Lake Femunden			Brown trout	Salmo trutta	Liver	36.2	517		<0,5	<0,5	<0,5	<0,5	1.56	3.66	25.2	13	66.5	6.8	4.98	<0,5	<0,1	<0,1	<0,1	<0,1	5.22		<0,1	<0,1	<0,2	0.63	<0,3	<0,3	<5	<5		<0,3	<0,3	<0,3	<0,3	<0,3
ØF-L-7	2017	Long-range transport, rural	Lake Femunden			Brown trout	Salmo trutta	Liver	38.6	685		<0,5	<0,5	<0,5	<0,5	1.41	2.05	8.1	3.45	14	1.9	1.29	<0,5	<0,1	<0,1	<0,1	<0,1	2.64		<0,1	<0,1	<0,2	0.24	<0,3	<0,3	<5	<5		<0,3	<0,3	<0,3	<0,3	<0,3
ØF-L-8	2017	Long-range transport, rural	Lake Femunden			Brown trout	Salmo trutta	Liver	40	674		<0,5	<0,5	<0,5	<0,5	<0,5	0.71	2.67	1.27	4.41	0.81	0.68	<0,5	<0,1	<0,1	<0,1	<0,1	0.85		<0,1	<0,1	<0,2	<0,1	<0,3	<0,3	<5	<5		<0,3	<0,3	<0,3	<0,3	<0,3
ØF-L-9	2017	Long-range transport, rural	Lake Femunden			Brown trout	Salmo trutta	Liver	41	688		<0,5	<0,5	<0,5	<0,5	<0,5	0.5	2.08	1.18	7.04	1.14	0.86	<0,5	<0,1	<0,1	<0,1	<0,1	0.76		<0,1	<0,1	<0,2	0.12	<0,3	<0,3	<5	<5		<0,3	<0,3	<0,3	<0,3	<0,3
ØF-L-10	2017	Long-range transport, rural	Lake Femunden			Brown trout	Salmo trutta	Liver	33.1	504		<0,5	<0,5	<0,5	<0,5	<0,5	0.97	4.88	3.15	18.9	2.55	2.31	<0,5	<0,1	<0,1	<0,1	<0,1	1.62		<0,1	<0,1	<0,2	0.27	<0,3	<0,3	<5	<5		<0,3	<0,3	<0,3	<0,3	<0,3
KM-L-1	2018	Diffuse	Lake Mjøsa			European smelt	Osmerus eperlanus	Liver	8.5	4.1		<0,5	<0,5	<0,5	<0,5	<0,5	0.80863	<0,4	<0,4	<0,4	<0,4	<0,5	<0,5	<0,2	<0,2	<0,1	<0,1	0.5276		<0,1	<0,1	<0,2	<0,1	<0,3	<0,3	<5	<5		<0,3	<0,3	<0,3	<0,3	<0,3	<0,3
KM-L-2	2018	Diffuse	Lake Mjøsa			European smelt	Osmerus eperlanus	Liver	8.6	3.9		<0,5	<0,5	<0,5	<0,5	<0,5	0.61637	1.80532	1.49721	1.03752	<0,4	<0,5	<0,5	<0,2	<0,2	<0,1	<0,1	1.03054		<0,1	<0,1	<0,2	<0,1	<0,3	<0,3	<5	<5		<0,3	<0,3	<0,3	<0,3	<0,3	<0,3
KM-L-3	2018	Diffuse	Lake Mjøsa			European smelt	Osmerus eperlanus	Liver	8.2	4.1		<0,5	<0,5	<0,5	<0,5	0.64905	0.50778	1.91118	1.5649	1.81067	<0,4	<0,5	<0,5	<0,2	<0,2	<0,1	<0,1	1.35617		<0,1	<0,1	<0,2	<0,1	<0,3	<0,3	<5	<5		<0,3	<0,3	<0,3	<0,3	<0,3	<0,3
KM-L-4	2018	Diffuse	Lake Mjøsa			European smelt	Osmerus eperlanus	Liver	8.9	4.3		<0,5	<0,5	<0,5	<0,5	0.50993	<0,5	0.77212	0.7075	<0,4	<0,4	<0,5	<0,5	<0,2	<0,2	<0,1	<0,1	0.69105		<0,1	<0,1	<0,2	<0,1	<0,3	<0,3	<5	<5		<0,3	<0,3	<0,3	<0,3	<0,3	<0,3
KM-L-5	2018	Diffuse	Lake Mjøsa			European smelt	Osmerus eperlanus	Liver	9.2	4.5		<0,5	<0,5	<0,5	<0,5	<0,5	<0,5	0.77242	0.45713	<0,4	<0,4	<0,5	<0,5	<0,2	<0,2	<0,1	<0,1	0.47319		<0,1	<0,1	<0,2	<0,1	<0,3	<0,3	<5	<5		<0,3	<0,3	<0,3	<0,3	<0,3	<0,3
KM-L-6	2018	Diffuse	Lake Mjøsa			European smelt	Osmerus eperlanus	Liver	26	86		<0,5	<0,5	<0,5	<0,5	1.01588	4.84392	11.4767	7.86984	9.2111	3.37058	1.17673	<0,5	<0,2	<0,2	<0,1	<0,1	8.3072		<0,1	<0,1	<0,2	0.7038	<0,3	<0,3	<5	<5		<0,3	<0,3	<0,3	<0,3	<0,3	<0,3
KM-L-7	2018	Diffuse	Lake Mjøsa			European smelt	Osmerus eperlanus	Liver	23	73		<0,5	<0,5	<0,5	<0,5	0.93854	4.60177	12.7059	7.81171	7.67621	2.73706	0.90615	<0,5	<0,2	<0,2	<0,1	<0,1	8.14894		<0,1	<0,1	<0,2	0.78479	<0,3	<0,3	<5	<5		<0,3	<0,3	<0,3	<0,3	<0,3	<0,3
KM-L-8	2018	Diffuse	Lake Mjøsa			European smelt	Osmerus eperlanus	Liver	19.9	50.5		<0,5	<0,5	<0,5	<0,5	0.89462	2.48078	7.20413	4.49723	4.44518	1.35892	0.32242	<0,5	<0,2	<0,2	<0,1	<0,1	4.68692		<0,1	<0,1	<0,2	0.51124	<0,3	<0,3	<5	<5		<0,3	<0,3	<0,3	<0,3	<0,3	<0,3
KM-L-9	2018	Diffuse	Lake Mjøsa			European smelt	Osmerus eperlanus	Liver	23.5	78		<0,5	<0,5	<0,5	<0,5	0.76007	2.48716	6.28239	4.36947	5.18811	1.71078	0.65171	<0,5	<0,2	<0,2	<0,1	<0,1	3.62106		<0,1	<0,1	<0,2	0.42236	<0,3	<0,3	<5	<5		<0,3	<0,3	<0,3	<0,3	<0,3	<0,3
KM-L-10	2018	Diffuse	Lake Mjøsa			European smelt	Osmerus eperlanus	Liver	23.1	78		<0,5	<0,5	<0,5	<0,5	1.04821	3.97651	11.5557	7.58416	7.51987	2.56855	1.03971	<0,5	<0,2	<0,2	<0,1	<0,1	7.34351		<0,1	<0,1	<0,2	0.46354	<0,3	<0,3	<5	<5		<0,3	<0,3	<0,3	<0,3	<0,3	<0,3
LM-L-1	2018	Diffuse	Lake Mjøsa			Vendace	Coregonus albula	Liver	24.5	177		<0,5	<0,5	<0,5	<0,5	1.17721	<0,5	0.64861	0.52824	0.55501	<0,4	<0,5	<0,5	<0,2	<0,2	<0,1	<0,1	3.80057		<0,1	0.13268	<0,2	<0,1	<0,3	<0,3	<5	<5		<0,3	<0,3	<0,3	<0,3	<0,3	<0,3
LM-L-2	2018	Diffuse	Lake Mjøsa			Vendace	Coregonus albula	Liver	23.9	112		<0,5	<0,5	<0,5	<0,5	0.89275	0.97646	1.38612	1.31595	1.36955	0.49222	<0,5	<0,5	<0,2	<0,2	<0,1	<0,1	5.75419		<0,1	<0,1	<0,2	<0,1	<0,3	<0,3	<5	<5		<0,3	<0,3	<0,3	<0,3	<0,3	<0,3
LM-L-3	2018	Diffuse	Lake Mjøsa			Vendace	Coregonus albula	Liver	19.9	65		<0,5	<0,5	<0,5	<0,5	<0,5	<0,5	<0,4	<0,4	<0,4	<0,4	<0,5	<0,5	<0,2	<0,2	<0,1	<0,1	0.4052		<0,1	0.14904	<0,2	<0,1	<0,3	<0,3	<5	<5		<0,3	<0,3	<0,3	<0,3	<0,3	<0,3
LM-L-4	2018	Diffuse	Lake Mjøsa			Vendace	Coregonus albula	Liver	19.6	58		<0,5	<0,5	<0,5	<0,5	<0,5	<0,5	0.56151	<0,4	<0,4	<0,4	<0,5	<0,5	<0,2	<0,2	<0,1	<0,1	0.88467		<0,1	<0,1	<0,2	<0,1	<0,3	<0,3	<5	<5		<0,3	<0,3	<0,3	<0,3	<0,3	<0,3
LM-L-5	2018	Diffuse	Lake Mjøsa			Vendace	Coregonus albula	Liver	19.7	56		<0,5	<0,5	<0,5	<0,5	<0,5	<0,5	<0,4	<0,4	<0,4	<0,4	<0,5	<0,5	<0,2	<0,2	<0,1	<0,1	0.54816		<0,1	<0,1	<0,2	<0,1	<0,3	<0,3	<5	<5		<0,3	<0,3	<0,3	<0,3	<0,3	<0,3
LM-L-6	2018	Diffuse	Lake Mjøsa			Vendace	Coregonus albula	Liver	15.3	22		<0,5	<0,5	<0,5	<0,5	0.52898	<0,5	<0,4	0.99914	<0,4	<0,4	<0,5	<0,5	<0,2	<0,2	<0,1	<0,1	3.71867		<0,1	<0,1	<0,2	<0,1	<0,3	<0,3	<5	<5		<0,3	<0,3	<0,3	<0,3	<0,3	<0,3
LM-L-7	2018	Diffuse	Lake Mjøsa			Vendace	Coregonus albula	Liver	20.1	54		<0,5	<0,5	<0,5	<0,5	<0,5	<0,5	<0,4	0.68581	<0,4	<0,4	<0,5	<0,5	<0,2	<0,2	<0,1	<0,1	0.3079		<0,1	0.30823	<0,2	<0,1	<0,3	<0,3	<5	<5		<0,3	<0,3	<0,3	<0,3	<0,3	<0,3
LM-L-8	2018	Diffuse	Lake Mjøsa			Vendace	Coregonus albula	Liver	18.45	48		<0,5	<0,5	<0,5	<0,5	<0,5	<0,5	0.57087	0.62847	0.53379	<0,4	<0,5	<0,5	<0,2	<0,2	<0,1	<0,1	0.99208		<0,1	<0,1	<0,2	<0,1	<0,3	<0,3	<5	<5		<0,3	<0,3	<0,3	<0,3	<0,3	<0,3
LM-L-9	2018	Diffuse	Lake Mjøsa			Vendace	Coregonus albula	Liver	19.95	55		<0,5	<0,5	<0,5	<0,5	<0,5	<0,5	0.65211	0.55333	<0,4	<0,4	<0,5	<0,5	<0,2	<0,2	<0,1	<0,1	0.69009		<0,1	0.10661	<0,2	<0,1	<0,3	<0,3	<5	<5		<0,3	<0,3	<0,3	<0,3	<0,3	<0,3
LM-L-10	2018	Diffuse	Lake Mjøsa			Vendace	Coregonus albula	Liver	19.8	54.5		<0,5	<0,5	<0,5	<0,5	<0,5	<0,5	<0,4	<0,4	<0,4	<0,4	<0,5	<0,5	<0,2	<0,2	<0,1	<0,1	0.76336		<0,1	0.18265	<0,2	<0,1	<0,3	<0,3	<5	<5		<0,3	<0,3	<0,3	<0,3	<0,3	<0,3
ØM-L-1	2018	Diffuse	Lake Mjøsa			Brown trout	Salmo trutta	Liver	68	3237		<0,5	<0,5	<0,5	<0,5	0.75516	7.49268	22.191	12.1025	15.1763	5.37202	2.55823	<0,5	<0,2	<0,2	<0,1	<0,1	18.8033		<0,1	<0,1	<0,2	0.87751	<0,3	<0,3	<5	<5		<0,3	<0,3	<0,3	<0,3	<0,3	<0,3
ØM-L-2	2018	Diffuse	Lake Mjøsa			Brown trout	Salmo trutta	Liver	70	2809		<0,5	<0,5	<0,5	<0,5	<0,5	3.15985	9.01925	6.15578	7.06497	2.40574	1.19669	<0,5	<0,2	<0,2	<0,1	<0,1	7.84803		<0,1	<0,1	<0,2	1.36625	<0,3	<0,3	<5	<5		<0,3	<0,3	<0,3	0.58	<0,3	<0,3
ØM-L-3	2018	Diffuse	Lake Mjøsa			Brown trout	Salmo trutta	Liver	70	3231		<0,5	<0,5	<0,5	<0,5	<0,5	2.86472	6.28685	3.94717	3.82527	1.37375	0.95771	<0,5	<0,2	<0,2	<0,1	<0,1	6.15682		<0,1	<0,1	<0,2	0.86215	<0,3	<0,3	<5	<5		<0,3	<0,3	<0,3	<0,3	<0,3	<0,3
ØM-L-4	2018	Diffuse	Lake Mjøsa			Brown trout	Salmo trutta	Liver	60	2329		<0,5	<0,5	<0,5	<0,5	0.6567	6.01041	16.2842	9.6017	17.8303	4.29087	1.4366	<0,5	<0,2	<0,2	<0,1	<0,1	12.3532		<0,1	<0,1	<0,2	0.93485	<0,3	<0,3	<5	<5		<0,3	<0,3	<0,3	<0,3	<0,3	<0,3
ØM-L-5	2018	Diffuse	Lake Mjøsa			Brown trout	Salmo trutta	Liver	64	2445		<0,5	<0,5	<0,5	<0,5	<0,5	3.10552	6.64859	4.6787	4.8897	1.81817	1.02	<0,5	<0,2	<0,2	<0,1	<0,1	6.44762		<0,1	<0,1	<0,2	0.54952	<0,3	<0,3	<5	<5		<0,3	<0,3	<0,3	<0,3	<0,3	<0,3
ØM-L-6	2018	Diffuse	Lake Mjøsa			Brown trout	Salmo trutta	Liver	75	4817		<0,5	<0,5	<0,5	<0,5	<0,5	5.30357	15.2288	9.63002	24.3902	4.39902	2.08199	<0,5	<0,2	<0,2	<0,1	<0,1	13.2423		<0,1	<0,1	<0,2	0.76834	<0,3	<0,3	<5	<5		<0,3	<0,3	<0,3	<0,3	<0,3	<0,3
ØM-L-7	2018	Diffuse	Lake Mjøsa			Brown trout	Salmo trutta	Liver	65	2768		<0,5	<0,5	<0,5	<0,5	<0,5	3.47147	10.3406	7.26787	11.9021	3.6033	1.2349	<0,5	<0,2	<0,2	<0,1	<0,1	8.1119		<0,1	<0,1	<0,2	0.74699	<0,3	<0,3	<5	<5		<0,3	<0,3	<0,3	<0,3	<0,3	<0,3
ØM-L-8	2018	Diffuse	Lake Mjøsa			Brown trout	Salmo trutta	Liver	67	2838		<0,5	<0,5	<0,5	<0,5	0.59662	4.24356	10.287	6.8023	7.45664	2.35412	1.10485	<0,5	<0,2	<0,2	<0,1	<0,1	8.96932		<0,1	<0,1	<0,2	0.65451	<0,3	<0,3	<5	<5		<0,3	<0,3	<0,3	<0,3	<0,3	<0,3
ØM-L-9	2018	Diffuse	Lake Mjøsa			Brown trout	Salmo trutta	Liver	62	2367		<0,5	<0,5	<0,5	<0,5	0.51162	4.81641	14.5125	9.64754	12.5575	4.241	1.38674	<0,5	<0,2	<0,2	<0,1	<0,1	9.83312		<0,1	<0,1	<0,2	1.21188	<0,3	<0,3	<5	<5		<0,3	<0,3	<0,3	<0,3	<0,3	<0,3
ØM-L-10	2018	Diffuse	Lake Mjøsa			Brown trout	Salmo trutta	Liver	70	3450		<0,5	<0,5	<0,5	<0,5	0.66373	5.17135	12.9708	8.27658	12.7321	2.95888	1.48078	<0,5	<0,2	<0,2	<0,1	<0,1	11.4315		<0,1	<0,1	<0,2	1.31797	<0,3	<0,3	<5	<5		<0,3	<0,3	<0,3	<0,3	<0,3	<0,3
ØM-L-11	2018	Diffuse	Lake Mjøsa			Brown trout	Salmo trutta	Liver	81	6200		<0,5	<0,5	<0,5	<0,5	1.53792	7.51768	20.9854	12.3443	14.1483	5.04621	2.32392	<0,5	<0,2	<0,2	<0,1	0.26839	14.7844		<0,1	0.14313	<0,2	1.48038	<0,3	<0,3	<5	<5		<0,3	<0,3	<0,3	<0,3	<0,3	<0,3
ØM-L-12	2018	Diffuse	Lake Mjøsa			Brown trout	Salmo trutta	Liver	73	4800		<0,5	<0,5	<0,5	<0,5	0.58977	1.3782	1.90065	1.30458	1.20172	0.68414	0.56595	<0,5	<0,2	<0,2	<0,1	0.03042	1.88429		<0,1	<0,1	<0,2	0.34534	<0,3	<0,3	<5	<5		<0,3	<0,3	<0,3	<0,3	<0,3	<0,3
ØM-L-13	2018	Diffuse	Lake Mjøsa			Brown trout	Salmo trutta	Liver	58	2550		<0,5	<0,5	<0,5	<0,5	1.97224	6.30608	19.1014	11.9028	14.8928	5.22763	1.93653	<0,5	<0,2	<0,2	<0,1	0.12746	15.1735		<0,1	0.13162	<0,2	0.88844	<0,3	<0,3	<5	<5		<0,3	<0,3	<0,3	<0,3	<0,3	<0,3
ØM-L-14	2018	Diffuse	Lake Mjøsa			Brown trout	Salmo trutta	Liver	70	4400		<0,5	<0,5	<0,5	<0,5	<0,5	0.68475	0.72801	0.5826	0.73254	0.48678	<0,5	<0,5	<0,2	<0,2	<0,1	<0,1	0.89781		<0,1	<0,1	<0,2	0.15191	<0,3	<0,3	<5	<5		<0,3	<0,3	<0,3	<0,3	<0,3	<0,3
ØM-L-15	2018	Diffuse	Lake Mjøsa			Brown trout	Salmo trutta	Liver	63	3000		<0,5	<0,5	<0,5	<0,5	0.79738	4.373	12.7358	8.98478	12.8364	4.37227	1.50328	<0,5	<0,2	<0,2	<0,1	0.10604	12.8395		<0,1	0.12614	<0,2	0.99621	<0,3	<0,3	<5	<5		<0,3	<0,3	<0,3	<0,3	<0,3	<0,3
ØF-L-1	2018	Long-range transport, rural	Lake Femunden			Brown trout	Salmo trutta	Liver	42.5	770		<0,5	<0,5	<0,5	<0,5	0.52796	0.64626	1.22527	0.74212	1.1571	0.39773	<0,5	<0,5	<0,2	<0,2	<0,1	<0,1	0.48195		<0,1	<0,1	<0,2	<0,1	<0,3	<0,3	<5	<5		<0,3	<0,3	<0,3	<0,3	<0,3	<0,3
ØF-L-2	2018	Long-range transport, rural	Lake Femunden			Brown trout	Salmo trutta	Liver	35.3	440		<0,5	<0,5	<0,5	<0,5	0.002	<0,5	0.722	0.47737	1.17203	<0,4	<0,5	<0,5	<0,2	<0,2	<0,1	<0,1	0.38742		<0,1	<0,1	<0,2	<0,1	<0,3	<0,3	<5	<5		<0,3	<0,3	<0,3	<0,3	<0,3	<0,3
ØF-L-3	2018	Long-range transport, rural	Lake Femunden			Brown trout	Salmo trutta	Liver	46.8	940		<0,5	<0,5	<0,5	<0,5	1.14921	1.35668	4.27571	2.76804	9.70749	2.00496	2.7449	<0,5	<0,2	<0,2	<0,1	<0,1	2.61239		<0,1	<0,1	<0,2	0.45586	<0,3	<0,3	<5	<5		<0,3	<0,3	<0,3	<0,3	<0,3	<0,3
ØF-L-4	2018	Long-range transport, rural	Lake Femunden			Brown trout	Salmo trutta	Liver	36.3	501		<0,5	<0,5	<0,5	<0,5	0.66825	1.00709	3.10394	1.8187	4.66239	0.98163	1.21037	<0,5	<0,2	<0,2	<0,1	<0,1	1.27591		<0,1	<0,1	<0,2	<0,1	<0,3	<0,3	<5	<5		<0,3	<0,3	<0,3	<0,3	<0,3	<0,3
ØF-L-5	2018	Long-range transport, rural	Lake Femunden			Brown trout	Salmo trutta	Liver	44.3	1005		<0,5	<0,5	<0,5	<0,5	<0,5	0.75276	1.54238	0.81572	1.93535	0.48954	0.83598	<0,5	<0,2	<0,2	<0,1	<0,1	0.86988		<0,1	<0,1	<0,2	<0,1	<0,3	<0,3	<5	<5		<0,3	<0,3	<0,3	<0,3	<0,3	<0,3
ØF-L-6	2018	Long-range transport, rural	Lake Femunden			Brown trout	Salmo trutta	Liver	48.7	1100		<0,5	<0,5	<0,5	<0,5	<0,5	1.14534	3.57717	2.49245	8.24927	2.07117	3.25527	<0,5	<0,2	<0,2	<0,1	<0,1	1.09665		<0,1	<0,1	<0,2	0.17446	<0,3	<0,3	<5	<5		<0,3	<0,3	<0,3	<0,3	<0,3	<0,3
ØF-L-7	2018	Long-range transport, rural	Lake Femunden			Brown trout	Salmo trutta	Liver	34.7	410		<0,5	<0,5	<0,5	<0,5	<0,5	0.85972	2.47889	1.31669	3.10449	0.69316	0.79816	<0,5	<0,2	<0,2	<0,1	<0,1	0.80713		<0,1	<0,1	<0,2	<0,1	<0,3	<0,3	<5	<5		<0,3	<0,3	<0,3	<0,3	<0,3	<0,3
ØF-L-8	2018	Long-range transport, rural	Lake Femunden			Brown trout	Salmo trutta	Liver	37.5	520		<0,5	<0,5	<0,5	<0,5	<0,5	0.62558	2.39659	1.81423	4.26595	1.10017	1.17524	<0,5	<0,2	<0,2	<0,1	<0,1	0.98293		<0,1	<0,1	<0,2	<0,1	<0,3	<0,3	<5	<5		<0,3	<0,3	<0,3	<0,3	<0,3	<0,3
ØF-L-9	2018	Long-range transport, rural	Lake Femunden			Brown trout	Salmo trutta	Liver	44.2	850		<0,5	<0,5	<0,5	<0,5	<0,5	0.55823	2.02607	1.64308	4.82431	1.2204	1.39695	<0,5	<0,2	<0,2	<0,1	<0,1	0.8401		<0,1	<0,1	<0,2	<0,1	<0,3	<0,3	<5	<5		<0,3	<0,3	<0,3	<0,3	<0,3	<0,3
ØF-L-10	2018	Long-range transport, rural	Lake Femunden			Brown trout	Salmo trutta	Liver	46.9	1020		<0,5	<0,5	<0,5	<0,5	<0,5	0.63589	1.70703	1.08647	2.63757	0.7375	1.34679	<0,5	<0,2	<0,2	<0,1	<0,1	1.00562		<0,1	<0,1	<0,2	<0,1	<0,3	<0,3	<5	<5		<0,3	<0,3	<0,3	<0,3	<0,3	<0,3
KM-L-1	2019	Diffuse	Lake Mjøsa			European smelt	Osmerus eperlanus	Liver	8.5	15		<0,5	<0,5	<0,5	<0,5	1.26171	3.7687	7.56555	4.54254	5.25735	1.76253	<0,4		<0,2	<0,2	<0,2	<0,2	6.2		<0,2	<0,2	<0,2	0.76261	<0,3	<0,3	<2	<2		<0,3	<0,3	<0,3	<0,3	<0,3	<0,3
KM-L-2	2019	Diffuse	Lake Mjøsa			European smelt	Osmerus eperlanus	Liver	14.2	28		<0,5	<0,5	<0,5	<0,5	1.83184	7.71849	18.2451	10.3781	16.417	3.90023	0.72425		<0,2	<0,2	<0,2	<0,2	13.2		<0,2	<0,2	<0,2	1.13236	<0,3	<0,3	<2	<2		<0,3	<0,3	<0,3	<0,3	<0,3	<0,3
KM-L-3	2019	Diffuse	Lake Mjøsa			European smelt	Osmerus eperlanus	Liver	9	18		<0,5	<0,5	<0,5	<0,5	0.71536	2.30297	4.6775	2.92582	3.29855	0.89042	<0,4		<0,2	<0,2	<0,2	<0,2	4.5		<0,2	<0,2	<0,2	0.54697	<0,3	<0,3	<2	<2		<0,3	<0,3	<0,3	<0,3	<0,3	<0,3
KM-L-4	2019	Diffuse	Lake Mjøsa			European smelt	Osmerus eperlanus	Liver	8.8	18		<0,5	<0,5	<0,5	<0,5	1.60361	4.91033	10.6006	6.0688	6.13519	2.00563	<0,4		<0,2	<0,2	<0,2	<0,2	7.8		<0,2	<0,2	<0,2	0.82478	<0,3	<0,3	<2	<2		<0,3	<0,3	<0,3	<0,3	<0,3	<0,3
KM-L-5	2019	Diffuse	Lake Mjøsa			European smelt	Osmerus eperlanus	Liver	9.5	20		<0,5	<0,5	<0,5	<0,5	1.74095	3.76873	7.43622	5.07135	5.38106	1.66467	<0,4		<0,2	<0,2	<0,2	<0,2	6.2		<0,2	<0,2	<0,2	0.70543	<0,3	<0,3	<2	<2		<0,3	<0,3	<0,3	<0,3	<0,3	<0,3
KM-L-6	2019	Diffuse	Lake Mjøsa			European smelt	Osmerus eperlanus	Liver	11	22		<0,5	<0,5	<0,5	<0,5	1.87769	6.80423	15.3179	8.24636	10.9366	2.63607	0.51296		<0,2	<0,2	<0,2	<0,2	10.6		<0,2	<0,2	<0,2	1.41436	<0,3	<0,3	<2	<2		<0,3	<0,3	<0,3	<0,3	<0,3	<0,3
KM-L-7	2019	Diffuse	Lake Mjøsa			European smelt	Osmerus eperlanus	Liver	10.5	23		<0,5	<0,5	<0,5	<0,5	1.38715	4.16926	8.63126	5.89533	6.52704	1.97169	<0,4		<0,2	<0,2	<0,2	<0,2	6.8		<0,2	<0,2	<0,2	1.09825	<0,3	<0,3	<2	<2		<0,3	<0,3	<0,3	<0,3	<0,3	<0,3
KM-L-8	2019	Diffuse	Lake Mjøsa			European smelt	Osmerus eperlanus	Liver	11.2	22		<0,5	<0,5	<0,5	<0,5	2.04839	6.67685	14.5894	8.16226	11.2327	2.65946	0.51989		<0,2	<0,2	<0,2	<0,2	10.5		<0,2	<0,2	<0,2	1.17469	<0,3	<0,3	<2	<2		<0,3	<0,3	<0,3	<0,3	<0,3	<0,3
KM-L-9	2019	Diffuse	Lake Mjøsa			European smelt	Osmerus eperlanus	Liver	12.5	24		<0,5	<0,5	<0,5	<0,5	1.37617	4.07705	7.88584	5.59338	5.48915	2.02718	<0,4		<0,2	<0,2	<0,2	<0,2	5.8		<0,2	<0,2	<0,2	1.1293	<0,3	<0,3	<2	<2		<0,3	<0,3	<0,3	<0,3	<0,3	<0,3
KM-L-10	2019	Diffuse	Lake Mjøsa			European smelt	Osmerus eperlanus	Liver	13.8	25		<0,5	<0,5	<0,5	<0,5	1.31966	4.89465	10.6472	5.72556	6.56644	1.7671	<0,4		<0,2	<0,2	<0,2	<0,2	7.6		<0,2	<0,2	<0,2	1.14824	<0,3	<0,3	<2	<2		<0,3	<0,3	<0,3	<0,3	<0,3	<0,3
LM-L-1	2019	Diffuse	Lake Mjøsa			Vendace	Coregonus albula	Liver	17.9333	31.5667		<0,5	<0,5	<0,5	<0,5	0.65148	1.32275	2.8336	2.06606	2.12394	0.96919	<0,4		<0,2	<0,2	<0,2	<0,2	2.7		<0,2	<0,2	<0,2	0.10178	<0,3	<0,3	<2	<2		<0,3	<0,3	<0,3	<0,3	<0,3	<0,3
LM-L-2	2019	Diffuse	Lake Mjøsa			Vendace	Coregonus albula	Liver	18.8	39.3		<0,5	<0,5	<0,5	<0,5	<0,5	1.0967	2.23111	1.90136	1.36977	0.71577	<0,4		<0,2	<0,2	<0,2	<0,2	2.3		<0,2	<0,2	<0,2	0.11033	<0,3	<0,3	<2	<2		<0,3	<0,3	<0,3	<0,3	<0,3	<0,3
LM-L-3	2019	Diffuse	Lake Mjøsa			Vendace	Coregonus albula	Liver	18.5667	34.1667		<0,5	<0,5	<0,5	<0,5	<0,5	1.09076	2.61668	2.02558	1.88382	0.96861	<0,4		<0,2	<0,2	<0,2	<0,2	2.9		<0,2	<0,2	<0,2	0.12378	<0,3	<0,3	<2	<2		<0,3	<0,3	<0,3	<0,3	<0,3	<0,3
LM-L-4	2019	Diffuse	Lake Mjøsa			Vendace	Coregonus albula	Liver	18.3	34.8333		<0,5	<0,5	<0,5	<0,5	<0,5	1.17146	2.73775	2.00408	1.72553	0.89381	<0,4		<0,2	<0,2	<0,2	<0,2	2.5		<0,2	<0,2	<0,2	<0,1	<0,3	<0,3	<2	<2		<0,3	<0,3	<0,3	<0,3	<0,3	<0,3
LM-L-5	2019	Diffuse	Lake Mjøsa			Vendace	Coregonus albula	Liver	17.7	31.525		<0,5	<0,5	<0,5	<0,5	<0,5	1.42069	2.88632	2.30984	1.66978	0.86542	<0,4		<0,2	<0,2	<0,2	<0,2	2.8		<0,2	<0,2	<0,2	0.11007	<0,3	<0,3	<2	<2		<0,3	<0,3	<0,3	<0,3	<0,3	<0,3
ØM-L-1	2019	Diffuse	Lake Mjøsa			Brown trout	Salmo trutta	Liver	74	5500		<0,5	<0,5	<0,5	<0,5	0.67635	2.68999	6.44049	3.94793	5.45737	1.53801	<0,4		<0,2	<0,2	<0,2	<0,2	5.74875		<0,2	<0,2	<0,2	0.88795	<0,3	<0,3	<2	<2		<0,3	<0,3	<0,3	<0,3	<0,3	<0,3
ØM-L-2	2019	Diffuse	Lake Mjøsa			Brown trout	Salmo trutta	Liver	71	4700		<0,5	<0,5	<0,5	<0,5	<0,5	1.45617	2.76807	1.7582	1.99838	0.63022	<0,4		<0,2	<0,2	<0,2	<0,2	3.24997		<0,2	<0,2	<0,2	0.71204	<0,3	<0,3	<2	<2		<0,3	<0,3	<0,3	<0,3	<0,3	<0,3
ØM-L-3	2019	Diffuse	Lake Mjøsa			Brown trout	Salmo trutta	Liver	78	7300		<0,5	<0,5	<0,5	<0,5	<0,5	2.07619	4.98798	3.62084	6.63391	1.85637	0.53184		<0,2	<0,2	<0,2	<0,2	4.96447		<0,2	<0,2	<0,2	0.73879	<0,3	<0,3	<2	<2		<0,3	<0,3	<0,3	<0,3	<0,3	<0,3
ØM-L-4	2019	Diffuse	Lake Mjøsa			Brown trout	Salmo trutta	Liver	68	4300		<0,5	<0,5	<0,5	<0,5	0.53646	1.99477	4.3848	2.97537	4.58523	1.29551	<0,4		<0,2	<0,2	<0,2	<0,2	4.48469		<0,2	<0,2	<0,2	0.50657	<0,3	<0,3	<2	<2		<0,3	<0,3	<0,3	<0,3	<0,3	<0,3
ØM-L-5	2019	Diffuse	Lake Mjøsa			Brown trout	Salmo trutta	Liver	68	2700		<0,5	<0,5	<0,5	<0,5	0.56815	2.48842	4.98152	1.38661	3.99388	0.98724	<0,4		<0,2	<0,2	<0,2	<0,2	5.38467		<0,2	<0,2	<0,2	0.54446	<0,3	<0,3	<2	<2		<0,3	<0,3	<0,3	<0,3	<0,3	<0,3
ØM-L-6	2019	Diffuse	Lake Mjøsa			Brown trout	Salmo trutta	Liver	80	5900		<0,5	<0,5	<0,5	<0,5	1.28646	4.64264	12.1809	7.21819	7.49916	2.58232	0.61716		<0,2	<0,2	<0,2	<0,2	9.87868		<0,2	<0,2	<0,2	1.19023	<0,3	<0,3	<2	<2		<0,3	<0,3	<0,3	<0,3	<0,3	<0,3
ØM-L-7	2019	Diffuse	Lake Mjøsa			Brown trout	Salmo trutta	Liver	71	4700		<0,5	<0,5	<0,5	<0,5	<0,5	0.74022	1.32847	<0,4	1.03423	<0,4	<0,4		<0,2	<0,2	<0,2	<0,2	1.71908		<0,2	<0,2	<0,2	0.50435	<0,3	<0,3	<2	<2		<0,3	<0,3	<0,3	<0,3	<0,3	<0,3
ØM-L-8	2019	Diffuse	Lake Mjøsa			Brown trout	Salmo trutta	Liver	58	2500		<0,5	<0,5	<0,5	<0,5	0.58848	2.60235	7.75081	5.15488	8.97271	2.40426	0.59652		<0,2	<0,2	<0,2	<0,2	6.49137		<0,2	<0,2	<0,2	1.36645	<0,3	<0,3	<2	<2		<0,3	<0,3	<0,3	<0,3	<0,3	<0,3
ØM-L-9	2019	Diffuse	Lake Mjøsa			Brown trout	Salmo trutta	Liver	80	6800		<0,5	<0,5	<0,5	<0,5	0.81649	3.53638	9.72872	6.19953	9.5515	2.67408	0.7363		<0,2	<0,2	<0,2	<0,2	8.95168		<0,2	<0,2	<0,2	0.47124	<0,3	<0,3	<2	<2		<0,3	<0,3	<0,3	<0,3	<0,3	<0,3
ØM-L-10	2019	Diffuse	Lake Mjøsa			Brown trout	Salmo trutta	Liver	66	3400		<0,5	<0,5	<0,5	<0,5	0.90127	4.10952	11.1182	6.21061	8.61332	2.64473	0.71162		<0,2	<0,2	<0,2	<0,2	9.85607		<0,2	<0,2	<0,2	1.23258	<0,3	<0,3	<2	<2		<0,3	<0,3	<0,3	<0,3	<0,3	<0,3
ØM-L-11	2019	Diffuse	Lake Mjøsa			Brown trout	Salmo trutta	Liver	66	3300		<0,5	<0,5	<0,5	<0,5	0.73574	3.08735	8.25556	5.00685	5.77127	2.02189	0.45445		<0,2	<0,2	<0,2	<0,2	7.32081		<0,2	<0,2	<0,2	1.01969	<0,3	<0,3	<2	<2		<0,3	<0,3	<0,3	<0,3	<0,3	<0,3
ØM-L-12	2019	Diffuse	Lake Mjøsa			Brown trout	Salmo trutta	Liver	66	3300		<0,5	<0,5	<0,5	<0,5	0.58747	3.53483	7.97296	4.68937	6.10137	1.73416	0.45918		<0,2	<0,2	<0,2	<0,2	7.55324		<0,2	<0,2	<0,2	1.05807	<0,3	<0,3	<2	<2		<0,3	<0,3	<0,3	<0,3	<0,3	<0,3
ØM-L-13	2019	Diffuse	Lake Mjøsa			Brown trout	Salmo trutta	Liver	72	2600		<0,5	<0,5	<0,5	<0,5	0.8146	4.76607	12.5627	6.88479	11.1674	2.46174	0.63173		<0,2	<0,2	<0,2	<0,2	10.7878		<0,2	<0,2	<0,2	0.99886	<0,3	<0,3	<2	<2		<0,3	<0,3	<0,3	<0,3	<0,3	<0,3
ØM-L-14	2019	Diffuse	Lake Mjøsa			Brown trout	Salmo trutta	Liver	77	3800		<0,5	<0,5	<0,5	<0,5	0.53242	2.8757	7.7259	5.84492	11.1724	2.68917	0.83222		<0,2	<0,2	<0,2	<0,2	7.70084		<0,2	<0,2	<0,2	0.50484	<0,3	<0,3	<2	<2		<0,3	<0,3	<0,3	<0,3	<0,3	<0,3
ØM-L-15	2019	Diffuse	Lake Mjøsa			Brown trout	Salmo trutta	Liver	64	3400		<0,5	<0,5	<0,5	<0,5	0.9319	3.84593	9.83531	5.4959	7.94933	2.08284	0.519		<0,2	<0,2	<0,2	<0,2	7.4706		<0,2	<0,2	<0,2	1.45091	<0,3	<0,3	<2	<2		<0,3	<0,3	<0,3	<0,3	<0,3	<0,3
ØF-L-1	2019	Long-range transport, rural	Lake Femunden			Brown trout	Salmo trutta	Liver	41	727		<0,5	<0,5	<0,5	<0,5	0.66491	1.15418	4.49682	2.1669	7.00251	0.97955	0.43046		<0,2	<0,2	<0,2	<0,2	1.7		<0,2	<0,2	<0,2	0.18669	<0,3	<0,3	<2	<2		<0,3	<0,3	<0,3	<0,3	<0,3	<0,3
ØF-L-2	2019	Long-range transport, rural	Lake Femunden			Brown trout	Salmo trutta	Liver	38	539		<0,5	<0,5	<0,5	<0,5	0.6408	2.30103	8.13033	3.16519	6.66157	1.20044	<0,4		<0,2	<0,2	<0,2	<0,2	2.9		<0,2	<0,2	<0,2	0.18977	<0,3	<0,3	<2	<2		<0,3	<0,3	<0,3	<0,3	<0,3	<0,3
ØF-L-3	2019	Long-range transport, rural	Lake Femunden			Brown trout	Salmo trutta	Liver	42	851		<0,5	<0,5	<0,5	<0,5	0.54717	1.53045	7.42233	4.17646	15.9384	2.29255	0.57055		<0,2	<0,2	<0,2	<0,2	2.4		<0,2	<0,2	<0,2	0.42358	<0,3	<0,3	<2	<2		<0,3	<0,3	<0,3	<0,3	<0,3	<0,3
ØF-L-4	2019	Long-range transport, rural	Lake Femunden			Brown trout	Salmo trutta	Liver	41	789		<0,5	<0,5	<0,5	<0,5	0.61677	2.16329	12.057	6.70198	26.5982	4.40375	1.3649		<0,2	<0,2	<0,2	<0,2	3.3		<0,2	<0,2	<0,2	0.58149	<0,3	<0,3	<2	<2		<0,3	<0,3	<0,3	<0,3	<0,3	<0,3
ØF-L-5	2019	Long-range transport, rural	Lake Femunden			Brown trout	Salmo trutta	Liver	37	534		<0,5	<0,5	<0,5	<0,5	<0,5	2.50076	13.623	8.02906	31.5671	5.22562	2.35724		<0,2	<0,2	<0,2	<0,2	4.3		<0,2	<0,2	<0,2	0.61006	<0,3	<0,3	<2	<2		<0,3	<0,3	<0,3	<0,3	<0,3	<0,3
ØF-L-6	2019	Long-range transport, rural	Lake Femunden			Brown trout	Salmo trutta	Liver	44	748		<0,5	<0,5	<0,5	<0,5	2.66851	3.07656	8.71184	2.74542	5.93278	1.13524	0.37277		<0,2	<0,2	<0,2	<0,2	4.3		<0,2	<0,2	<0,2	0.63579	<0,3	<0,3	<2	<2		<0,3	<0,3	<0,3	<0,3	<0,3	<0,3
ØF-L-7	2019	Long-range transport, rural	Lake Femunden			Brown trout	Salmo trutta	Liver	47	1224		<0,5	<0,5	<0,5	<0,5	0.61604	1.21724	7.2237	4.24701	14.9957	2.82133	0.69865		<0,2	<0,2	<0,2	<0,2	2.6		<0,2	<0,2	<0,2	0.21095	<0,3	<0,3	<2	<2		<0,3	<0,3	<0,3	<0,3	<0,3	<0,3
ØF-L-8	2019	Long-range transport, rural	Lake Femunden			Brown trout	Salmo trutta	Liver	34	510		<0,5	<0,5	<0,5	<0,5	0.70486	2.34337	12.8416	7.3744	26.4353	3.90062	1.33214		<0,2	<0,2	<0,2	<0,2	3.3		<0,2	<0,2	<0,2	0.58572	<0,3	<0,3	<2	<2		<0,3	<0,3	<0,3	<0,3	<0,3	<0,3
ØF-L-9	2019	Long-range transport, rural	Lake Femunden			Brown trout	Salmo trutta	Liver	40	686		<0,5	<0,5	<0,5	<0,5	0.73386	1.45548	6.98179	4.15807	14.2318	2.38591	0.88684		<0,2	<0,2	<0,2	<0,2	2.3		<0,2	<0,2	<0,2	0.57746	<0,3	<0,3	<2	<2		<0,3	<0,3	<0,3	<0,3	<0,3	<0,3
ØF-L-10	2019	Long-range transport, rural	Lake Femunden			Brown trout	Salmo trutta	Liver	37	514		<0,5	<0,5	<0,5	<0,5	<0,5	1.10281	5.83842	3.30435	11.243	1.97255	0.45231		<0,2	<0,2	<0,2	<0,2	1.9		<0,2	<0,2	<0,2	0.23416	<0,3	<0,3	<2	<2		<0,3	<0,3	<0,3	<0,3	<0,3	<0,3
	2009	Diffuse	Lake Mjøsa			European smelt	Osmerus eperlanus	Muscle	24.5	104.95	<0,118098		<0,75281	<0,499383	<0,374917	<0,449572	<1,282073	<0,440235						<0,040707		<0,032905		1.17379			0.146349		0.329885
	2009	Diffuse	Lake Mjøsa			European smelt	Osmerus eperlanus	Muscle	27	114	<0,170795		<0,502231	<0,70892	<0,52056	<0,711015	<1,533144	<0,730258						<0,04082		<0,036292		1.47202			0.0658566		0.409919
	2009	Diffuse	Lake Mjøsa			European smelt	Osmerus eperlanus	Muscle	25	93	<0,191413		<0,563635	<1,161617	<0,737437	<0,784725	<2,039212	<0,812065						<0,045341		<0,033195		1.46816			0.0430392		0.39473
	2009	Diffuse	Lake Mjøsa			European smelt	Osmerus eperlanus	Muscle	24.5	85	<0,19652		<0,709791	<1,352953	<0,758474	<0,760011	<1,940797	<0,870614						<0,042008		<0,031981		1.19874			<0,034904		0.346218
	2009	Diffuse	Lake Mjøsa			European smelt	Osmerus eperlanus	Muscle	24.5	86.5	<0,204982		<0,756774	<0,976491	<0,680179	<0,891631	<1,795548	<0,722385						<0,041044		<0,031086		1.68604			0.0397594		0.60249
	2009	Diffuse	Lake Mjøsa			European smelt	Osmerus eperlanus	Muscle	23.5	74.5	<0,284256		<1,130124	<1,531264	<1,146072	<1,220721	<3,200385	<4,780954						<0,059541		<0,035745		1.42057			0.0451051		0.673924
	2009	Diffuse	Lake Mjøsa			European smelt	Osmerus eperlanus	Muscle	24.75	91.5	<0,302908		<1,17727	<1,868641	<1,237328	<1,332103	<4,056355	<1,886844						<0,061368		<0,049213		2.0738			<0,051211		0.644856
	2009	Diffuse	Lake Mjøsa			European smelt	Osmerus eperlanus	Muscle	23.5	68	<0,425209		<1,228376	<1,538174	<1,365522	<1,504863	<4,037084	<2,569428						<0,058603		<0,050626		1.65743			<0,057245		0.574074
	2009	Diffuse	Lake Mjøsa			European smelt	Osmerus eperlanus	Muscle	22.75	67.5	<0,641979		<3,466267	<3,971586	<2,650806	<2,890681	<8,29896	<2,775314						<0,051404		<0,03662		2.15161			<0,041053		0.646792
	2009	Diffuse	Lake Mjøsa			European smelt	Osmerus eperlanus	Muscle	23.25	74.5	<0,291717		<1,252007	<1,271329	<1,367429	<1,285839	<3,757731	<1,26769						<0,054163		<0,039643		1.43466			<0,052973		0.661323
	2009	Diffuse	Lake Mjøsa			European smelt	Osmerus eperlanus	Muscle	23.25	72.5	<0,359595		<1,407779	<2,457064	<1,509526	<1,675361	<4,243814	<1,689813						<0,050493		<0,046448		1.42926			0.0637615		0.549629
	2009	Diffuse	Lake Mjøsa			European smelt	Osmerus eperlanus	Muscle	23	64	<0,605421		<2,177806	<3,990764	<2,689917	<2,773541	<5,636512	<7,583139						<0,061498		<0,052076		1.26581			<0,050871		0.447228
	2009	Diffuse	Lake Mjøsa			European smelt	Osmerus eperlanus	Muscle	22.75	67.5	<0,279384		<1,094961	<1,677987	<1,247956	<1,181571	<3,819076	<1,168237						<0,056705		<0,042781		1.14788			<0,051086		0.530732
	2009	Diffuse	Lake Mjøsa			European smelt	Osmerus eperlanus	Muscle	23.5	79.5	<0,220811		<0,635479	<1,20331	<0,851672	<0,976747	<2,993078	<1,122491						<0,054548		<0,041861		1.54044			<0,048499		0.502918
	2009	Diffuse	Lake Mjøsa			European smelt	Osmerus eperlanus	Muscle	23.25	72	<0,321952		<1,564462	<1,640834	<1,258221	<1,503592	<3,856093	<2,034621						<0,052193		<0,03817		0.926713			<0,040723		0.609994
	2009	Diffuse	Lake Mjøsa			European smelt	Osmerus eperlanus	Muscle	23	64.5	<0,228493		<1,137352	<0,855444	<1,037068	<1,125261	<2,810407	<1,60021						<0,055072		<0,046749		1.44727			<0,042625		0.487707
	2009	Diffuse	Lake Mjøsa			European smelt	Osmerus eperlanus	Muscle	22.5	64	<0,214424		<1,406734	<1,057401	<0,985807	<1,009286	<2,987406	<0,924644						<0,0499		<0,045621		0.949318			<0,041398		0.579962
	2009	Diffuse	Lake Mjøsa			European smelt	Osmerus eperlanus	Muscle	22.25	66.5	<0,240285		<0,856255	<1,319697	<1,011005	<1,110158	<3,162673	<1,778577						<0,069597		<0,048946		1.7294			<0,052266		0.509049
	2009	Diffuse	Lake Mjøsa			European smelt	Osmerus eperlanus	Muscle	21.1667	52	<0,253549		<1,118875	<1,727344	<0,921856	<1,118252	<2,885607	<1,502382						<0,053822		<0,043678		1.53549			<0,047204		0.466977
	2009	Diffuse	Lake Mjøsa			European smelt	Osmerus eperlanus	Muscle	21.8333	59	<0,172397		<0,586879	<0,771154	<0,710021	<0,823679	<2,428852	<0,77592						<0,04234		<0,039203		1.20228			<0,035038		0.434583
	2010	Diffuse	Lake Mjøsa			European smelt	Osmerus eperlanus	Muscle	20.5	45.3333	<0,251346		<0,390327	<0,467678	<0,482275	<0,489826	<0,603958	<0,485146						<0,09793		<0,045125		0.892926			<0,041986		0.292369
	2010	Diffuse	Lake Mjøsa			European smelt	Osmerus eperlanus	Muscle	21.8	64	<0,812292		<1,03623	<1,288915	<1,354631	<1,359342	<1,82583	<1,755877						<0,042488		<0,035657		0.789667			<0,035921		0.134975
	2010	Diffuse	Lake Mjøsa			European smelt	Osmerus eperlanus	Muscle	23.5	84.5	<1,553041		<1,913903	<2,478356	<2,625169	<2,4708	<2,677174	<6,57271						<0,048236		<0,035458		1.16308			<0,037486		0.292147
	2010	Diffuse	Lake Mjøsa			European smelt	Osmerus eperlanus	Muscle	23.7	97.5	<0,922277		<1,496763	<1,877753	<1,841206	<1,423844	<2,080659	<1,914742						<0,047757		<0,035706		1.09013			<0,038591		0.10872
	2010	Diffuse	Lake Mjøsa			European smelt	Osmerus eperlanus	Muscle	23.55	89.5	<1,540741		<1,686935	<2,223498	<2,22943	<2,437477	<4,542208	<4,100328						<0,067417		<0,055077		1.02806			<0,044414		<0,145081
	2010	Diffuse	Lake Mjøsa			European smelt	Osmerus eperlanus	Muscle	23.6	90.5	<0,325782		<0,569127	<0,674116	<0,591604	<0,63477	<1,648386	<0,696331						<0,174057		<0,070013		1.34069			<0,050967		0.537263
	2010	Diffuse	Lake Mjøsa			European smelt	Osmerus eperlanus	Muscle	23.8	80.5	<0,249121		<0,344751	<0,482887	<0,556903	<0,489155	<0,514751	1.08717						<0,108872		<0,040239		0.905157			<0,045489		0.216938
	2010	Diffuse	Lake Mjøsa			European smelt	Osmerus eperlanus	Muscle	24	89	<0,338274		<0,585477	<0,72144	<0,647025	<0,727149	<0,819699	1.02095						<0,091096		<0,052396		1.59791			<0,045269		0.424328
	2010	Diffuse	Lake Mjøsa			European smelt	Osmerus eperlanus	Muscle	21.9	69.5	<0,301822		<0,673662	<0,824973	<0,632577	<0,497706	<0,630702	1.03489						<0,09264		<0,051867		1.18618			<0,055064		0.329274
	2010	Diffuse	Lake Mjøsa			European smelt	Osmerus eperlanus	Muscle	23.9	90	<0,313382		<0,398525	<0,643816	<0,632802	<0,628014	<0,851181	1.67794						<0,103228		<0,042011		1.39768			0.0497152		0.167401
	2010	Diffuse	Lake Mjøsa			European smelt	Osmerus eperlanus	Muscle	23.4	84	<0,30149		<0,997992	<0,701643	<0,739021	<0,696975	<0,904348	<0,702302						<0,13565		<0,0451		1.61907			<0,048828		0.33274
	2010	Diffuse	Lake Mjøsa			European smelt	Osmerus eperlanus	Muscle	22.65	80.5	<0,276096		<0,452015	<0,48764	<0,478112	<0,415152	<0,903121	0.856898						<0,067307		<0,038792		1.07654			<0,039817		0.375927
	2010	Diffuse	Lake Mjøsa			European smelt	Osmerus eperlanus	Muscle	22.95	78	<0,263409		<0,582091	<0,555749	<0,574463	<0,498608	<0,674906	<0,543906						<0,069601		<0,054252		1.07121			<0,041069		0.483644
	2010	Diffuse	Lake Mjøsa			European smelt	Osmerus eperlanus	Muscle	18.85	45.5	<0,341715		<0,53884	<0,755807	<0,691507	<0,641385	<0,781818	<0,649395						<0,080438		<0,05196		0.950894			<0,051911		<0,082474
	2010	Diffuse	Lake Mjøsa			European smelt	Osmerus eperlanus	Muscle	16.65	26	<0,274502		<0,637886	<0,573021	<0,486223	<0,605525	<0,777196	<0,567694						<0,157851		<0,06545		0.796826			<0,058477		0.356863
	2010	Diffuse	Lake Mjøsa			European smelt	Osmerus eperlanus	Muscle	23.85	83	<0,287708		<0,468247	<0,71093	<0,562776	<0,593878	<0,887011	<0,629091						<0,207113		<0,046863		1.28834			<0,050632		0.385781
	2010	Diffuse	Lake Mjøsa			European smelt	Osmerus eperlanus	Muscle	23.7	88.5	<0,320945		<0,566355	<0,853654	<0,655259	<0,59829	<0,759724	<0,642378						<0,09406		<0,052233		1.15453			<0,045671		0.33996
	2010	Diffuse	Lake Mjøsa			European smelt	Osmerus eperlanus	Muscle	23.25	78.5	<0,270438		<0,495348	<0,796077	<0,582885	<0,60919	<1,063565	<0,603714						<0,439774		<0,065207		1.58024			<0,072167		0.480209
	2010	Diffuse	Lake Mjøsa			European smelt	Osmerus eperlanus	Muscle	22.85	82	<0,475495		<0,516955	<0,459711	<0,407553	<0,410244	<0,244181	<0,416919						<0,197305		<0,035678		0.816773			<0,026704		0.263025
	2010	Diffuse	Lake Mjøsa			European smelt	Osmerus eperlanus	Muscle	25.25	92.5	<0,353857		<0,462923	<1,469722	<0,588609	<0,87367	<1,241038	<0,705894						<0,096865		<0,058036		1.56974			0.0612695		0.335442
	2011	Diffuse	Lake Mjøsa			European smelt	Osmerus eperlanus	Muscle	22.15	62.5	<0,591312		<0,321594	<0,438306	1.73337	0.445274	0.804862	2.19822						<0,052452		<0,061337		1.46778			<0,100718		0.753975
	2011	Diffuse	Lake Mjøsa			European smelt	Osmerus eperlanus	Muscle	18.2667	32.3333	<0,824403		<0,365886	<0,599706	1.58595	<0,380466	0.563803	1.28565						<0,061178		<0,059439		0.983494			<0,120895		<0,34565
	2011	Diffuse	Lake Mjøsa			European smelt	Osmerus eperlanus	Muscle	16.375	27.25	<0,795179		<0,384654	<0,67371	1.85578	<0,39272	0.431274	1.58027						<0,059121		<0,063967		0.929688			<0,117228		<0,2974
	2011	Diffuse	Lake Mjøsa			European smelt	Osmerus eperlanus	Muscle	19.5	50.6667	<0,607489		<0,37888	<1,095598	1.17393	<0,349217	0.855919	2.71224						<0,042141		<0,045035		1.57746			<0,095164		0.612379
	2011	Diffuse	Lake Mjøsa			European smelt	Osmerus eperlanus	Muscle	16.5	25	<0,645431		<0,466309	<0,546216	1.46866	<0,302636	0.312264	1.16003						<0,052036		<0,067974		0.633774			<0,098911		<0,346077
	2011	Diffuse	Lake Mjøsa			European smelt	Osmerus eperlanus	Muscle	23	95	<0,549146		<0,393052	<0,488484	1.12132	0.427109	0.44857	1.27397						<0,054365		<0,237032		0.851413			<0,113701		<0,39293
	2011	Diffuse	Lake Mjøsa			European smelt	Osmerus eperlanus	Muscle	25	98	<0,604227		<0,328841	<0,613098	1.11091	<0,266239	0.592756	1.78717						<0,048727		<0,050457		0.931083			<0,077311		4.95396
	2011	Diffuse	Lake Mjøsa			European smelt	Osmerus eperlanus	Muscle	24.5	92	<0,681279		<0,387688	<0,546382	1.14116	<0,320402	0.619538	2.18417						<0,055232		<0,058604		1.00815			<0,096079		0.502998
	2011	Diffuse	Lake Mjøsa			European smelt	Osmerus eperlanus	Muscle	24	96	<0,745285		<0,529407	<0,712159	1.64421	0.599452	0.750486	2.25401						<0,066492		<0,071215		1.07529			<0,149145		0.932293
	2011	Diffuse	Lake Mjøsa			European smelt	Osmerus eperlanus	Muscle	23	94	<0,651244		<0,408846	<0,613904	1.64053	<0,302038	0.43813	1.73239						<0,053973		<0,066805		0.748258			<0,083912		0.619777
	2011	Diffuse	Lake Mjøsa			European smelt	Osmerus eperlanus	Muscle	25.5	100	<0,632845		<0,406576	<0,512032	1.3161	<0,305242	0.487015	2.08482						<0,049615		<0,12418		1.02274			<0,10119		0.39444
	2011	Diffuse	Lake Mjøsa			European smelt	Osmerus eperlanus	Muscle	21.75	67	<0,712015		<0,398027	<0,609965	1.72862	<0,282277	0.472305	1.98772						<0,048516		<0,072228		1.03191			<0,099507		<0,451116
	2011	Diffuse	Lake Mjøsa			European smelt	Osmerus eperlanus	Muscle	21.5	63.5	<0,69251		<0,384299	<0,549423	1.41091	<0,294592	0.35565	1.59027						<0,050652		<0,054787		0.656073			<0,090714		<0,289593
	2011	Diffuse	Lake Mjøsa			European smelt	Osmerus eperlanus	Muscle	22.25	62.5	<0,63029		<0,343943	<0,514848	1.29898	<0,248885	0.424784	1.25699						<0,047297		<0,066956		0.760839			<0,078961		0.71729
	2011	Diffuse	Lake Mjøsa			European smelt	Osmerus eperlanus	Muscle	25	94	<0,716007		<0,39838	<0,693169	1.46697	<0,328255	0.520318	1.79692						<0,053645		<0,159283		0.902817			<0,098084		0.644162
	2011	Diffuse	Lake Mjøsa			European smelt	Osmerus eperlanus	Muscle	18.5	37.6667	<0,636784		<0,267591	<0,474245	1.68003	<0,300937	0.322769	1.32735						<0,053731		<0,059382		0.501427			<0,095322		<0,4039
	2011	Diffuse	Lake Mjøsa			European smelt	Osmerus eperlanus	Muscle	18.3333	34.3333	<0,572677		<0,292389	<0,521508	1.29465	<0,251163	0.30146	1.11746						<0,045744		<0,093289		0.497366			<0,086754		0.242077
	2011	Diffuse	Lake Mjøsa			European smelt	Osmerus eperlanus	Muscle	17.1667	26	<0,506782		<0,301342	<0,461638	1.55665	<0,238596	0.497098	1.39761						<0,042274		<0,137287		0.579805			<0,076526		<0,257546
	2011	Diffuse	Lake Mjøsa			European smelt	Osmerus eperlanus	Muscle	15	17.5	<0,61548		<0,273866	<0,557861	1.17538	0.316672	0.248807	0.862046						<0,045883		<0,045673		0.336927			<0,078763		0.362148
	2011	Diffuse	Lake Mjøsa			European smelt	Osmerus eperlanus	Muscle	14	14.25	<0,637797		<0,306917	<0,419953	1.21175	<0,278879	0.248153	1.08037						<0,045213		<0,056964		0.603219			<0,092035		<0,295735
	2012	Diffuse	Lake Mjøsa			European smelt	Osmerus eperlanus	Muscle	24.3	85	<1,31		<0,28	<0,78	<0,2	0.27	0.69	2.03						<0,26		<0,11		1.35			<0,08		0.64
	2012	Diffuse	Lake Mjøsa			European smelt	Osmerus eperlanus	Muscle	22.6	79	<1,7		<0,4	<1,04	<0,28	<0,32	0.92	3.77						<0,34		<0,14		2.62			<0,1		0.67
	2012	Diffuse	Lake Mjøsa			European smelt	Osmerus eperlanus	Muscle	24.6	99	<1,14		<0,23	<0,66	<0,17	<0,24	1.03	3.46						<0,21		<0,11		1.96			0.1		0.81
	2012	Diffuse	Lake Mjøsa			European smelt	Osmerus eperlanus	Muscle	22	76	<1,55		<0,38	<0,89	<0,25	<0,3	0.91	3.19						<0,24		<0,13		2.32			<0,08		0.71
	2012	Diffuse	Lake Mjøsa			European smelt	Osmerus eperlanus	Muscle	26.3	122	<1,43		<0,28	<0,68	<0,18	<0,21	0.83	2.54						<0,17		<0,1		1.71			<0,06		0.73
	2012	Diffuse	Lake Mjøsa			European smelt	Osmerus eperlanus	Muscle	23.1	72	<1,38		<0,36	<0,83	<0,21	<0,26	0.78	2.76						<0,25		<0,12		1.78			<0,07		0.77
	2012	Diffuse	Lake Mjøsa			European smelt	Osmerus eperlanus	Muscle	23.5	87	<1,2		<0,27	<0,79	<0,16	0.16	1.2	3.91						<0,17		<0,09		2.33			<0,06		0.78
	2012	Diffuse	Lake Mjøsa			European smelt	Osmerus eperlanus	Muscle	21.2	70	<1,31		<0,32	<0,76	<0,21	0.25	0.74	2.44						<0,3		<0,12		1.84			<0,06		0.6
	2012	Diffuse	Lake Mjøsa			European smelt	Osmerus eperlanus	Muscle	23.2	73	<1,36		<0,4	<0,82	<0,18	<0,27	0.72	2.65						<0,2		<0,11		1.69			<0,07		0.75
	2012	Diffuse	Lake Mjøsa			European smelt	Osmerus eperlanus	Muscle	24.3	110	<1,52		<0,26	<0,86	<0,17	0.24	0.99	3.84						<0,22		<0,1		2.37			0.08		0.82
	2012	Diffuse	Lake Mjøsa			European smelt	Osmerus eperlanus	Muscle	23.5	89	<1,45		<0,39	<1,58	<0,2	<0,25	0.59	2.1						<0,23		<0,1		1.45			<0,06		0.47
	2012	Diffuse	Lake Mjøsa			European smelt	Osmerus eperlanus	Muscle	22.7	85	<1,35		<0,27	<0,81	<0,18	0.38	0.97	3.8						<0,22		<0,1		2.7			0.09		0.7
	2012	Diffuse	Lake Mjøsa			European smelt	Osmerus eperlanus	Muscle	24.1	100	<1,26		<0,31	<0,75	<0,19	<0,23	0.67	2.54						<0,22		<0,1		1.58			<0,07		0.35
	2012	Diffuse	Lake Mjøsa			European smelt	Osmerus eperlanus	Muscle	25.2	104	<1,31		<0,26	<0,6	<0,17	<0,19	0.77	2.29						<0,18		<0,09		1.68			<0,07		0.5
	2012	Diffuse	Lake Mjøsa			European smelt	Osmerus eperlanus	Muscle	24.2	90	<1,22		<0,31	<0,6	<0,2	0.36	1.17	4.18						<0,24		<0,11		2.42			<0,08		0.9
	2012	Diffuse	Lake Mjøsa			European smelt	Osmerus eperlanus	Muscle	25.1	101	<1,26		<0,3	<0,89	<0,21	0.56	1.36	5.11						<0,22		<0,11		3.08			0.15		1.09
	2012	Diffuse	Lake Mjøsa			European smelt	Osmerus eperlanus	Muscle	24.4	96	<1,16		<0,27	<0,7	<0,18	<0,23	0.79	2.9						<0,21		<0,1		1.63			<0,06		0.71
	2012	Diffuse	Lake Mjøsa			European smelt	Osmerus eperlanus	Muscle	24.3	94	<1,06		<0,24	<0,57	<0,16	<0,19	0.6	1.81						<0,18		<0,1		1.34			<0,05		0.44
	2012	Diffuse	Lake Mjøsa			European smelt	Osmerus eperlanus	Muscle	23.4	89	<1,3		<0,29	<0,62	<0,23	<0,32	0.66	2.21						<0,22		<0,11		1.49			<0,07		0.45
	2012	Diffuse	Lake Mjøsa			European smelt	Osmerus eperlanus	Muscle	26.9	126	<1,98		<0,33	<0,58	<0,2	<0,34	0.84	2.15						<0,2		<0,12		1.61			<0,07		0.75
	2008	Diffuse	Lake Mjøsa			European smelt	Osmerus eperlanus	Muscle	23.7	91			<0,790479	<1,004838	<0,85714	0.512458	1.71092	<2,400576						<0,169512		<0,109781		4.14368			0.122488		2.52464
	2008	Diffuse	Lake Mjøsa			European smelt	Osmerus eperlanus	Muscle	22.7	74			<1,344898	<1,641592	<1,518229	0.67518	1.65721	2.675						<0,135671		<0,090621		4.63573			0.13595		1.68152
	2008	Diffuse	Lake Mjøsa			European smelt	Osmerus eperlanus	Muscle	21.3	58			<5,208855	<8,806438	<6,518502	<1,138811	<2,14715	<4,409789						<0,350161		<0,1836		<3,570472			<0,195108		1.67328
	2008	Diffuse	Lake Mjøsa			European smelt	Osmerus eperlanus	Muscle	22.2	69			<1,141133	<1,123633	<1,167128	<0,784435	<1,594338	<1,970636						<0,384553		<0,104431		2.77473			<0,10746		0.958079
	2008	Diffuse	Lake Mjøsa			European smelt	Osmerus eperlanus	Muscle	23	82			<1,887048	<1,971491	<1,575895	<0,811543	<1,392213	<2,840498						<0,242887		<0,113355		2.55381			<0,1223		0.891767
	2008	Diffuse	Lake Mjøsa			European smelt	Osmerus eperlanus	Muscle	22.5	75			<1,377025	<2,023218	<1,309685	<0,924937	<1,569077	<2,161106						<0,277644		<0,108129		8.89819			<0,113315		3.37953
	2008	Diffuse	Lake Mjøsa			European smelt	Osmerus eperlanus	Muscle	26.2	110			<1,423956	<1,98645	<1,238824	<0,948133	<1,174554	<2,372648						<0,230266		<0,116861		3.79524			<0,115745		1.84766
	2008	Diffuse	Lake Mjøsa			European smelt	Osmerus eperlanus	Muscle	22.5	70			<3,252895	<3,194675	<3,12555	<1,105534	<2,015658	<3,918917						<0,458711		<0,185915		6.64419			<0,206482		1.95416
	2008	Diffuse	Lake Mjøsa			European smelt	Osmerus eperlanus	Muscle	22.6	71			<0,830523	<1,240665	<1,027361	0.709906	2.3715	5.19104						<0,15917		<0,074061		3.02077			0.118512		2.55804
	2008	Diffuse	Lake Mjøsa			European smelt	Osmerus eperlanus	Muscle	21.2	65			<0,97931	<0,942823	<0,725172	0.410895	0.83455	3.30024						<0,203734		<0,071261		6.35637			0.0649842		0.892176
	2008	Diffuse	Lake Mjøsa			European smelt	Osmerus eperlanus	Muscle	22.4	81			<1,710166	<1,670096	<1,402476	0.710898	1.78319	4.98487						<0,15534		<0,118898		5.85642			<0,112765		2.75692
	2008	Diffuse	Lake Mjøsa			European smelt	Osmerus eperlanus	Muscle	23.9	89			<1,185594	<1,550766	<1,585073	1.1386	1.34079	5.65294						<0,185274		0.0768067		5.96504			<0,135742		2.46471
	2008	Diffuse	Lake Mjøsa			European smelt	Osmerus eperlanus	Muscle	22.5	70			<1,349916	<1,607596	<1,443786	<0,814391	2.13239	4.47192						<0,213185		<0,127845		6.00147			0.157314		1.74154
	2008	Diffuse	Lake Mjøsa			European smelt	Osmerus eperlanus	Muscle	23	86			<1,140816	<1,561133	<1,330112	<0,575438	1.17971	1.88876						<0,21377		<0,114988		2.77773			0.14109		3.00444
	2008	Diffuse	Lake Mjøsa			European smelt	Osmerus eperlanus	Muscle	22.5	74			<6,567292	<6,051666	<6,856026	<0,623015	2.29135	3.48942						<0,165034		<0,122063		4.85994			0.0836814		1.90298
	2008	Diffuse	Lake Mjøsa			European smelt	Osmerus eperlanus	Muscle	23.7	82			<6,224935	<8,018549	<8,282106	0.906779	2.1724	<3,029709						<0,241675		<0,157814		6.76309			0.194087		2.28813
	2008	Diffuse	Lake Mjøsa			European smelt	Osmerus eperlanus	Muscle	22.9	74			<1,011643	<0,941391	<1,417454	<0,47153	<0,949079	2.57418						<0,163212		<0,10265		2.43358			<0,114751		0.959412
	2008	Diffuse	Lake Mjøsa			European smelt	Osmerus eperlanus	Muscle	24	92			<1,261905	0.382484	<1,312499	0.455191	1.59068	6.40186						<0,21055		<0,135743		4.56945			0.13578		1.89794
	2008	Diffuse	Lake Mjøsa			European smelt	Osmerus eperlanus	Muscle	22.7	79			<1,163696	<1,276523	<1,206111	0.782723	2.53177	6.08747						<0,183201		<0,117029		5.78031			0.132405		2.30565
	2008	Diffuse	Lake Mjøsa			European smelt	Osmerus eperlanus	Muscle	20.3	66			<1,427729	<1,160188	<1,284471	<0,927507	1.06386	1.49326						0.242838		<0,137087		2.07171			<0,156207		1.20192
	2013	Diffuse	Lake Mjøsa			European smelt	Osmerus eperlanus	Muscle	17.05	26.5	<2		<0,5	<0,5	<0,5	<0,6	<0,5	1.1						<0,1		<0,1		0.53			<0,1		<0,1
	2013	Diffuse	Lake Mjøsa			European smelt	Osmerus eperlanus	Muscle	15.6	23.15	<2		<0,5	<0,5	<0,5	<0,6	<0,5	1.5						<0,1		<0,1		0.63			<0,1		<0,1
	2013	Diffuse	Lake Mjøsa			European smelt	Osmerus eperlanus	Muscle	12.65	10.2	<2		<0,5	<0,5	<0,5	<0,6	<0,5	0.42						<0,1		<0,1		0.19			<0,1		<0,1
	2013	Diffuse	Lake Mjøsa			European smelt	Osmerus eperlanus	Muscle	11.3	7.84	<2		<0,5	<0,5	<0,5	<0,6	<0,5	<0,4						<0,1		<0,1		0.3			<0,1		<0,1
	2013	Diffuse	Lake Mjøsa			European smelt	Osmerus eperlanus	Muscle	14.6667	19.6667	<2		<0,5	<0,5	<0,5	<0,6	0.53	1.2						<0,1		<0,1		0.5			<0,1		<0,1
	2013	Diffuse	Lake Mjøsa			European smelt	Osmerus eperlanus	Muscle	11.8667	9.03333	<2		<0,5	<0,5	<0,5	<0,6	<0,5	0.56						<0,1		<0,1		0.23			<0,1		<0,1
	2013	Diffuse	Lake Mjøsa			European smelt	Osmerus eperlanus	Muscle	12.1	9.6	<2		<0,5	<0,5	<0,5	<0,6	<0,5	<0,4						<0,1		<0,1		0.22			<0,1		<0,1
	2013	Diffuse	Lake Mjøsa			European smelt	Osmerus eperlanus	Muscle	12.26	9.64	<2		<0,5	<0,5	<0,5	<0,6	<0,5	<0,4						<0,1		<0,1		0.24			<0,1		<0,1
	2013	Diffuse	Lake Mjøsa			European smelt	Osmerus eperlanus	Muscle	11.78	9.18	<2		<0,5	<0,5	<0,5	<0,6	<0,5	<0,4						<0,1		<0,1		0.24			<0,1		<0,1
	2013	Diffuse	Lake Mjøsa			European smelt	Osmerus eperlanus	Muscle	11.78	9	<2		<0,5	<0,5	<0,5	<0,6	<0,5	0.6						<0,1		<0,1		0.18			<0,1		<0,1
	2013	Diffuse	Lake Mjøsa			European smelt	Osmerus eperlanus	Muscle	11.66	8.94	<2		<0,5	<0,5	<0,5	<0,6	<0,5	0.58						<0,1		<0,1		0.21			<0,1		<0,1
	2013	Diffuse	Lake Mjøsa			European smelt	Osmerus eperlanus	Muscle	11.9	9.86	<2		<0,5	<0,5	<0,5	<0,6	<0,5	0.66						<0,1		<0,1		0.27			<0,1		<0,1
	2013	Diffuse	Lake Mjøsa			European smelt	Osmerus eperlanus	Muscle	12	9.58	<2		<0,5	<0,5	<0,5	<0,6	<0,5	<0,4						<0,1		<0,1		0.18			<0,1		<0,1
	2013	Diffuse	Lake Mjøsa			European smelt	Osmerus eperlanus	Muscle	11.64	9.24	<2		<0,5	<0,5	<0,5	<0,6	<0,5	0.42						<0,1		<0,1		0.22			<0,1		<0,1
	2014	Diffuse	Lake Mjøsa			European smelt	Osmerus eperlanus	Muscle	12.2	9.1			<1	<0,5	<0,4	<0,5	0.6	0.6						<0,1		<0,2		0.4			<0,2		<0,2
	2014	Diffuse	Lake Mjøsa			European smelt	Osmerus eperlanus	Muscle	12.8	10.7			<1	<0,5	<0,4	<0,5	<0,5	0.5						<0,1		<0,2		0.4			<0,2		<0,2
	2014	Diffuse	Lake Mjøsa			European smelt	Osmerus eperlanus	Muscle	13	11.7			<1	<0,5	<0,4	<0,5	<0,5	0.6						<0,1		<0,2		0.5			<0,2		<0,2
	2014	Diffuse	Lake Mjøsa			European smelt	Osmerus eperlanus	Muscle	13.9	16			<1	<0,5	<0,4	<0,5	<0,5	0.5						<0,1		<0,2		0.3			<0,2		<0,2
	2015	Diffuse	Lake Mjøsa			European smelt	Osmerus eperlanus	Muscle	22.1	79			<0,5	<0,5	<0,5	<0,5	0.63	1.7						<0,1		<0,1		1.5			<0,2		0.2
	2015	Diffuse	Lake Mjøsa			European smelt	Osmerus eperlanus	Muscle	18.95	47.5			<0,5	<0,5	<0,5	<0,5	<0,5	0.64						<0,1		<0,1		0.78			<0,2		<0,1
	2009	Diffuse	Lake Mjøsa			Brown trout	Salmo trutta	Muscle	61.5	2628	<0,391596		<1,390171	<1,034059	<1,00013	<1,162494	<4,092393	<1,616514						<0,043279		<0,031486		0.617634			<0,037164		0.325122
	2009	Diffuse	Lake Mjøsa			Brown trout	Salmo trutta	Muscle	61	2532	<0,692292		<1,996357	<1,780396	<1,619755	<1,74718	<5,45029	<2,585155						<0,056686		<0,041757		1.19008			<0,059925		0.157863
	2009	Diffuse	Lake Mjøsa			Brown trout	Salmo trutta	Muscle	60.5	2538	<1,408999		<5,463409	<3,618645	<3,269951	<3,621966	<7,849741	<5,748105						<0,059189		<0,041613		0.95704			<0,05228		0.211839
	2009	Diffuse	Lake Mjøsa			Brown trout	Salmo trutta	Muscle	60	2631	<0,547851		<1,857212	<1,847156	<1,542729	<1,698266	<5,514051	<2,386659						<0,049954		<0,038168		1.24371			<0,038348		0.391022
	2009	Diffuse	Lake Mjøsa			Brown trout	Salmo trutta	Muscle	57.9	2204	<0,533245		<1,8103	<1,561051	<1,340163	<1,606645	<5,127705	<2,902658						<0,049886		<0,0386		0.574406			<0,053545		0.198528
	2009	Diffuse	Lake Mjøsa			Brown trout	Salmo trutta	Muscle	59	2352	<0,701668		<2,128716	<1,66961	<1,604859	<1,833703	<7,409102	<2,512567						<0,054499		<0,041978		0.797622			<0,06081		0.339881
	2009	Diffuse	Lake Mjøsa			Brown trout	Salmo trutta	Muscle	55.8	2132	<0,68882		<2,096351	<1,719418	<1,651222	<1,91549	<6,148304	<3,047994						<0,055058		<0,041056		1.23939			<0,057028		0.183496
	2009	Diffuse	Lake Mjøsa			Brown trout	Salmo trutta	Muscle	59.3	2153	<0,75047		<2,918987	<1,621485	<1,49612	<1,932166	<7,435642	<2,309093						<0,061866		<0,048859		1.02428			<0,052486		0.417076
	2009	Diffuse	Lake Mjøsa			Brown trout	Salmo trutta	Muscle	57.3	2136	<0,778924		<2,406215	<1,907211	<1,806504	<1,838914	<7,177	<2,521892						<0,053		<0,044289		0.930481			<0,048637		0.241903
	2009	Diffuse	Lake Mjøsa			Brown trout	Salmo trutta	Muscle	59.2	2194	<0,505002		<1,735642	<1,424163	<1,060242	<1,385533	<4,854367	<1,792757						<0,05376		<0,038112		1.16348			<0,05151		0.310409
	2009	Diffuse	Lake Mjøsa			Brown trout	Salmo trutta	Muscle	60.5	2497	<0,464654		<1,644502	<1,241831	<0,965322	<1,140563	<4,827677	<1,339562						<0,070415		<0,039486		1.09553			<0,053513		0.0941466
	2009	Diffuse	Lake Mjøsa			Brown trout	Salmo trutta	Muscle	57.7	2073	<0,575771		<1,608847	<1,318102	<1,154008	<1,442268	<6,114587	<1,714207						<0,052706		<0,043347		0.657017			<0,048956		0.226865
	2009	Diffuse	Lake Mjøsa			Brown trout	Salmo trutta	Muscle	61	2489	<0,536416		<1,544279	<1,267093	<1,092651	<1,383463	<5,12352	<1,644007						<0,053898		<0,04173		0.515702			<0,050842		0.0799526
	2009	Diffuse	Lake Mjøsa			Brown trout	Salmo trutta	Muscle	61	2146	<1,097183		<1,955102	<1,969616	<2,459726	<2,760765	<13,532505	<3,984586						<0,048157		<0,043992		0.764164			<0,037875		<0,063344
	2009	Diffuse	Lake Mjøsa			Brown trout	Salmo trutta	Muscle	61.7	2395	<0,627226		<1,257361	<1,245909	<1,458058	<1,498801	<5,705387	<1,890747						<0,108939		<0,081377		0.574385			<0,07922		<0,105003
	2009	Diffuse	Lake Mjøsa			Brown trout	Salmo trutta	Muscle	62.3	2128	<0,513545		<1,267394	<1,386275	<1,173589	<1,522355	<5,153547	<1,948694						<0,060995		<0,042293		1.25072			<0,0442		0.0914914
	2009	Diffuse	Lake Mjøsa			Brown trout	Salmo trutta	Muscle	60	2262	<0,519535		<1,2262	<1,197567	<1,202547	<1,36251	<5,46555	<1,972336						<0,052675		<0,038558		1.20878			<0,040962		0.106859
	2009	Diffuse	Lake Mjøsa			Brown trout	Salmo trutta	Muscle	61.6	2297	<0,521628		<1,39869	<1,155516	<1,189021	<1,387544	<6,288858	<1,833995						<0,047276		<0,044455		1.22465			<0,045313		0.123544
	2009	Diffuse	Lake Mjøsa			Brown trout	Salmo trutta	Muscle	57	2180	<0,506029		<1,201806	<1,189103	<1,17391	<1,337817	<5,573235	<1,882229						<0,053973		<0,041248		1.49855			<0,046074		0.155603
	2009	Diffuse	Lake Mjøsa			Brown trout	Salmo trutta	Muscle	59.8	2450	<0,347149		<0,844523	<0,975681	<0,962698	<1,203485	<4,679989	<1,5693						<0,05249		<0,039612		0.514606			<0,047346		0.164194
	2010	Diffuse	Lake Mjøsa			Brown trout	Salmo trutta	Muscle	63	2420	<0,222391		<0,695364	<0,709214	<0,6447	<1,027083	<0,879383	<0,69576						<0,092195		<0,059835		0.7001			<0,064309		<0,103329
	2010	Diffuse	Lake Mjøsa			Brown trout	Salmo trutta	Muscle	61	2300	<0,283958		<0,487325	<0,630082	<0,639545	<1,511181	<1,425806	<0,691927						<0,065656		<0,049754		0.475864			<0,052028		<0,081248
	2010	Diffuse	Lake Mjøsa			Brown trout	Salmo trutta	Muscle	72	4800	<0,281977		<0,407717	<0,7054	<0,604722	<0,76159	<1,15872	<0,609271						<0,0783		<0,056036		0.44636			<0,05226		<0,096987
	2010	Diffuse	Lake Mjøsa			Brown trout	Salmo trutta	Muscle	59	2680	<0,256312		<0,94878	<0,999666	<0,753032	<0,622042	<1,603499	<0,794756						<0,08617		<0,056805		0.766221			<0,062167		<0,091877
	2010	Diffuse	Lake Mjøsa			Brown trout	Salmo trutta	Muscle	76	4380	<0,254027		<0,390305	<0,711958	<0,572406	<0,580628	<1,022466	<0,545181						<0,087672		<0,046864		0.479598			<0,044249		<0,067768
	2010	Diffuse	Lake Mjøsa			Brown trout	Salmo trutta	Muscle	70	4200	<0,211651		<0,421244	<0,610907	<0,545743	<0,450884	<0,779989	<0,48289						<0,065809		<0,048346		0.845263			<0,055697		<0,080038
	2010	Diffuse	Lake Mjøsa			Brown trout	Salmo trutta	Muscle	64.5	2740	<0,240057		<0,625797	<0,743447	<0,748213	<1,70559	<1,567466							<0,104033		<0,069555		1.26037			<0,075006		<0,106379
	2010	Diffuse	Lake Mjøsa			Brown trout	Salmo trutta	Muscle	62	2470	<0,191245		<0,469392	<0,446385	<0,493601	<0,581235	<0,492347	<0,46339						<0,060049		<0,054692		0.601753			<0,044842		<0,071411
	2010	Diffuse	Lake Mjøsa			Brown trout	Salmo trutta	Muscle	65.5	2900	<0,21327		<0,413663	<0,575805	<0,647591	<0,637208	<1,629172	<0,600603						<0,088822		<0,055207		0.780987			<0,063318		<0,099262
	2010	Diffuse	Lake Mjøsa			Brown trout	Salmo trutta	Muscle	61	2480	<0,242515		<0,488482	<0,76996	<0,777215	<0,905477	<2,123503	<0,574768						<0,084443		<0,056812		1.00643			<0,055643		<0,101731
	2010	Diffuse	Lake Mjøsa			Brown trout	Salmo trutta	Muscle	56	1860	<0,236558		<0,401138	<0,671393	<0,606743	<0,526851	<1,677602	<0,558439						<0,072965		<0,055112		0.902012			<0,045938		<0,081016
	2010	Diffuse	Lake Mjøsa			Brown trout	Salmo trutta	Muscle	64.5	2770	<0,223408		<0,487904	<0,794059	<0,714821	<0,861146	<2,325471	<0,789331						<0,109878		<0,072557		0.903559			<0,076152		<0,107813
	2010	Diffuse	Lake Mjøsa			Brown trout	Salmo trutta	Muscle	64.5	2440	<0,276385		<0,402212	<0,580174	<0,534533	<0,538476	<1,925837	<0,608269						<0,062716		<0,051473		1.15954			<0,06376		<0,079712
	2010	Diffuse	Lake Mjøsa			Brown trout	Salmo trutta	Muscle	55	1900	<0,212029		<0,359386	<0,460029	<0,512466	<0,567864	<0,885111	0.839407						<0,065004		<0,046656		1.00686			<0,049139		<0,085528
	2010	Diffuse	Lake Mjøsa			Brown trout	Salmo trutta	Muscle	56	2020	<0,254163		<0,407828	<0,660059	<0,624735	<0,895329	<1,840227	<0,626182						<0,076044		<0,053037		0.730261			<0,064177		<0,087366
	2010	Diffuse	Lake Mjøsa			Brown trout	Salmo trutta	Muscle	50.5	1460	<0,217835		<0,346036	<0,531255	<0,518009	<0,426449	<0,803071	<0,496614						<0,067484		<0,04205		0.995865			<0,053628		<0,071932
	2010	Diffuse	Lake Mjøsa			Brown trout	Salmo trutta	Muscle	59	1800	<0,371659		<0,6052	<0,687981	<0,71914	<0,692955	<1,043838	<0,754045						<0,09519		<0,065548		0.190521			<0,078254		<0,108289
	2010	Diffuse	Lake Mjøsa			Brown trout	Salmo trutta	Muscle	43.5	880	<0,28288		<0,366117	<0,421428	<0,511716	<0,564545	<0,514032	<0,473305						<0,072816		<0,041305		0.256077			<0,041857		<0,061697
	2010	Diffuse	Lake Mjøsa			Brown trout	Salmo trutta	Muscle	63.5	1860	<0,256277		<0,404068	<0,523618	<0,576138	<0,49722	<0,703817	<0,519122						<0,05317		<0,042734		0.347962			<0,039163		<0,058648
	2010	Diffuse	Lake Mjøsa			Brown trout	Salmo trutta	Muscle	75	5140	<0,376443		<0,602646	<0,720714	<0,645413	<1,193834	<1,142976	<0,733919						<0,081238		<0,061169		0.943966			<0,065296		<0,10125
	2011	Diffuse	Lake Mjøsa			Brown trout	Salmo trutta	Muscle	90	8700	<0,800908		<0,817138	<0,560736	1.78136	<0,502446	<0,215182	0.390004						<0,050787		<0,059745		0.305548			<0,147053		<0,341389
	2011	Diffuse	Lake Mjøsa			Brown trout	Salmo trutta	Muscle	91	9400	<0,632417		<0,417592	<0,486444	1.55695	<0,342596	0.279852	0.823204						<0,048933		<0,050458		0.85417			0.0974866		<0,301138
	2011	Diffuse	Lake Mjøsa			Brown trout	Salmo trutta	Muscle	74	4500	<0,721318		<0,39239	<0,79575	1.29863	<0,461858	0.327746	1.31714						<0,047547		<0,060051		0.684062			<0,110849		<0,29832
	2011	Diffuse	Lake Mjøsa			Brown trout	Salmo trutta	Muscle	70	3900	<0,585731		<0,370735	<0,599001	1.53215	<0,635103	0.504661	1.84748						<0,055541		<0,058828		1.0234			<0,134445		<0,279349
	2011	Diffuse	Lake Mjøsa			Brown trout	Salmo trutta	Muscle	70	3480	<0,646296		<0,344825	<0,815814	1.75372	<0,302505	<0,215374	0.98315						<0,063277		<0,060888		0.576176			<0,163889		<0,373406
	2011	Diffuse	Lake Mjøsa			Brown trout	Salmo trutta	Muscle	68	3200	<0,912696		<0,514921	<0,929474	2.21191	<2,171515	<0,288374	1.11229						<0,076805		<0,100924		0.674548			<0,161579		<0,414291
	2011	Diffuse	Lake Mjøsa			Brown trout	Salmo trutta	Muscle	69	3280	<0,552376		<0,353698	<0,525073	1.64021	<0,420566	0.308378	1.2448						<0,054374		<0,059167		0.975651			<0,128302		<0,285587
	2011	Diffuse	Lake Mjøsa			Brown trout	Salmo trutta	Muscle	61	2320	<0,56865		<0,356002	<0,633293	1.31637	<0,231169	0.347412	0.965148						<0,041926		<0,047518		0.902518			<0,087689		<0,262967
	2011	Diffuse	Lake Mjøsa			Brown trout	Salmo trutta	Muscle	61	2550	<0,616491		<0,398138	<0,468942	1.3774	<0,320665	0.303605	1.88993						<0,04679		<0,209999		0.826452			<0,10375		0.411869
	2011	Diffuse	Lake Mjøsa			Brown trout	Salmo trutta	Muscle	62	2300	<0,590482		<0,322539	<0,557526	1.37324	<0,578699	0.289156	1.15221						<0,043116		<0,046829		0.731904			<0,090815		<0,243533
	2011	Diffuse	Lake Mjøsa			Brown trout	Salmo trutta	Muscle	64	2860	<0,619059		<0,373944	<0,549073	1.42986	<0,331208	0.361631	1.56667						<0,043758		<0,050736		0.866876			<0,087957		<0,230408
	2011	Diffuse	Lake Mjøsa			Brown trout	Salmo trutta	Muscle	71	3150	<0,645337		<0,330643	<0,525339	1.11408	<0,457062	<0,348515	0.54176						<0,058534		<0,059335		0.433621			<0,127447		<0,271804
	2011	Diffuse	Lake Mjøsa			Brown trout	Salmo trutta	Muscle	60	2300	<0,622748		<0,36945	<0,574539	1.47565	<0,479883	0.250546	1.48412						<0,048855		<0,054153		0.871534			<0,116771		<0,279622
	2011	Diffuse	Lake Mjøsa			Brown trout	Salmo trutta	Muscle	62	2250	<0,707762		<0,362264	<0,480216	1.74714	<0,255986	0.466169	2.02905						<0,048517		<0,071928		1.31673			<0,129555		<0,2848
	2011	Diffuse	Lake Mjøsa			Brown trout	Salmo trutta	Muscle	67.5	2960	<0,672416		<0,380484	<1,309107	1.76986	<0,309615	0.312883	1.29463						<0,049885		<0,054827		0.718583			<0,076075		<0,270299
	2011	Diffuse	Lake Mjøsa			Brown trout	Salmo trutta	Muscle	58	2360	<0,631088		<0,345767	<0,536398	1.66201	<0,348281	<0,258121	1.13404						<0,050154		<0,211784		0.413065			<0,118411		<0,285286
	2011	Diffuse	Lake Mjøsa			Brown trout	Salmo trutta	Muscle	55.5	1620	<0,689409		<0,403135	<0,670979	1.61155	<0,306563	0.247687	0.852639						<0,055533		<0,059868		0.401623			<0,10419		<0,315332
	2011	Diffuse	Lake Mjøsa			Brown trout	Salmo trutta	Muscle	67.5	3400	<0,530791		<0,33313	<0,713028	1.40052	<0,301636	0.237929	1.16052						<0,045929		<0,217653		0.856536			<0,080043		<0,27087
	2011	Diffuse	Lake Mjøsa			Brown trout	Salmo trutta	Muscle	54	1720	<0,768643		<0,377632	<0,780041	1.83706	<0,372344	0.357654	1.23114						<0,055432		<0,057073		0.554503			<0,089611		<0,272051
	2011	Diffuse	Lake Mjøsa			Brown trout	Salmo trutta	Muscle	61	2500	<0,893907		<0,406632	<0,766836	2.30004	<0,381848	<0,255696	1.46598						<0,055231		<0,060814		0.913307			<0,111342		<0,31666
	2012	Diffuse	Lake Mjøsa			Brown trout	Salmo trutta	Muscle	53.2	1950	<0,86		<0,17	<0,52	<0,14	<0,16	0.58	2.51						<0,14		<0,07		1.59			0.09		0.39
	2012	Diffuse	Lake Mjøsa			Brown trout	Salmo trutta	Muscle	63.3	2440	<0,95		<0,2	<0,42	<0,15	<0,2	0.33	1.45						<0,15		<0,07		0.9			<0,06		0.33
	2012	Diffuse	Lake Mjøsa			Brown trout	Salmo trutta	Muscle	52.5	1730	<0,97		<0,21	<0,52	<0,16	<0,2	0.47	1.73						<0,17		<0,08		1.02			<0,05		0.17
	2012	Diffuse	Lake Mjøsa			Brown trout	Salmo trutta	Muscle	53.4	1760	<1,05		<0,22	<0,49	<0,16	<0,21	0.34	1.45						<0,18		<0,08		0.87			<0,05		0.17
	2012	Diffuse	Lake Mjøsa			Brown trout	Salmo trutta	Muscle	61	2245	<0,91		<0,18	<0,51	<0,14	<0,17	0.12	0.59						<0,13		<0,07		0.54			<0,06		0.15
	2012	Diffuse	Lake Mjøsa			Brown trout	Salmo trutta	Muscle	58.7	1660	<1,36		<0,23	<0,53	<0,17	<0,24	<0,12	0.16						<0,19		<0,1		0.16			<0,07		0.2
	2012	Diffuse	Lake Mjøsa			Brown trout	Salmo trutta	Muscle	73.5	4160	<1,03		<0,26	<0,6	<0,19	<0,23	0.19	0.5						<0,18		<0,09		0.33			<0,07		0.21
	2012	Diffuse	Lake Mjøsa			Brown trout	Salmo trutta	Muscle	76.5	4320	<1,21		<0,26	<0,7	<0,17	<0,22	0.18	0.8						<0,19		<0,08		0.56			<0,06		0.13
	2012	Diffuse	Lake Mjøsa			Brown trout	Salmo trutta	Muscle	71.7	4140	<3,51		<1,14	<1,88	<0,66	<0,67	<0,29	0.67						<0,74		<0,42		0.4			<0,23		<0,31
	2012	Diffuse	Lake Mjøsa			Brown trout	Salmo trutta	Muscle	56.2	1760	<1,27		<0,32	<0,74	<0,2	<0,26	0.27	0.98						<0,2		<0,09		0.66			<0,19		0.19
	2012	Diffuse	Lake Mjøsa			Brown trout	Salmo trutta	Muscle	70.6	4840	<1,07		<0,26	<0,49	<0,17	<0,23	0.2	0.78						<0,17		<0,1		0.57			<0,06		0.58
	2012	Diffuse	Lake Mjøsa			Brown trout	Salmo trutta	Muscle	51.4	1580	<1,12		<0,29	<0,53	<0,17	<0,2	0.48	1.77						<0,16		<0,08		1.1			0.06		0.2
	2012	Diffuse	Lake Mjøsa			Brown trout	Salmo trutta	Muscle	54.3	2000	<1,26		<0,29	<0,59	<0,16	<0,19	0.3	1.43						<0,18		<0,08		0.94			<0,06		0.39
	2012	Diffuse	Lake Mjøsa			Brown trout	Salmo trutta	Muscle	53.1	1510	<0,98		<0,26	<0,64	<0,14	<0,2	0.2	0.56						<0,17		<0,07		0.38			<0,06		<0,09
	2012	Diffuse	Lake Mjøsa			Brown trout	Salmo trutta	Muscle	52.4	1820	<1,1		<0,26	<0,56	<0,15	<0,24	0.12	0.55						<0,14		<0,08		0.43			<0,06		<0,1
	2012	Diffuse	Lake Mjøsa			Brown trout	Salmo trutta	Muscle	68.7	3200	<1,16		<0,24	<0,58	<0,15	<0,21	0.3	0.62						<0,18		<0,07		0.65			<0,05		0.32
	2012	Diffuse	Lake Mjøsa			Brown trout	Salmo trutta	Muscle	47.5	1220	<0,97		<0,22	<0,43	<0,13	<0,17	0.4	1.42						<0,11		<0,07		1.02			<0,05		0.25
	2012	Diffuse	Lake Mjøsa			Brown trout	Salmo trutta	Muscle	53.8	1820	<2,86		<1,03	<1,66	<0,6	<0,53	<0,28	1.27						<0,59		<0,31		0.67			<0,24		<0,25
	2012	Diffuse	Lake Mjøsa			Brown trout	Salmo trutta	Muscle	56	2240	<1,16		<0,2	<0,45	<0,14	<0,2	0.24	1.25						<0,2		<0,08		0.62			<0,06		0.35
	2012	Diffuse	Lake Mjøsa			Brown trout	Salmo trutta	Muscle	63.7	3460	<1,14		<0,21	<0,47	<0,14	<0,16	0.32	1						<0,17		<0,08		0.58			<0,05		0.33
	2008	Diffuse	Lake Mjøsa			Brown trout	Salmo trutta	Muscle	67	3450	<1,029		<1,147	<0,986	<1,105	<1,41	<1,851	3.338						<0,362		<0,161		3.85			<0,104		1.28
	2008	Diffuse	Lake Mjøsa			Brown trout	Salmo trutta	Muscle	54	1670	<1,06		<0,837	<1,204	<1,029	<1,037	<2,121	1.79						<0,237		<0,129		2.76			<0,096		0.403
	2008	Diffuse	Lake Mjøsa			Brown trout	Salmo trutta	Muscle	61	2430	<0,889		<0,908	<0,831	<1,021	<1,181	<2,07	2.372						<0,255		<0,144		2.807			<0,103		1.109
	2008	Diffuse	Lake Mjøsa			Brown trout	Salmo trutta	Muscle	59	2520	<0,945		<0,734	<0,959	<0,987	<0,86	<0,097	2.098						<0,19		<0,126		3.299			<0,93		0.398
	2008	Diffuse	Lake Mjøsa			Brown trout	Salmo trutta	Muscle	53	1700	<1,185		<1,104	<1,29	<1,4	<1,08	<1,992	1.909						<0,329		0.171		3.743			0.136		0.23
	2008	Diffuse	Lake Mjøsa			Brown trout	Salmo trutta	Muscle	54.5	1720	<0,753		<0,841	<0,954	<0,79	<1,051	<2,316	1.579						<0,32		<0,142		2.416			<0,082		0.188
	2008	Diffuse	Lake Mjøsa			Brown trout	Salmo trutta	Muscle	49	1510	<1,216		<1,494	<1,219	<1,618	<1,412	<2,585	<2,779						<0,449		<0,181		0.964			<0,107		0.243
	2008	Diffuse	Lake Mjøsa			Brown trout	Salmo trutta	Muscle	50	1650	<1,171		<1,302	<1,616	<1,445	<1,516	<3,236	<2,446						<0,279		<0,213		0.818			<0,135		<0,181
	2008	Diffuse	Lake Mjøsa			Brown trout	Salmo trutta	Muscle	53	1620	<1,044		<1,754	<1,363	<1,788	<1,168	<3,428	3.334						<0,278		<0,216		4.784			<0,116		0.757
	2008	Diffuse	Lake Mjøsa			Brown trout	Salmo trutta	Muscle	57	2260	<0,69		<1,754	<0,681	<0,8	<0,783	1.339	5.432						<0,202		<0,16		5.5			0.128		1.171
	2008	Diffuse	Lake Mjøsa			Brown trout	Salmo trutta	Muscle	66	2800	<0,85		<0,81	<0,937	<0,946	<0,892	<2,98	2.916						<0,157		<0,15		2.823			0.075		0.292
	2008	Diffuse	Lake Mjøsa			Brown trout	Salmo trutta	Muscle	55	2000	<1,115		<0,821	<1,103	<1,46	<1,044	<2,16	1.713						<0,245		<0,153		2.499			<0,128		0.478
	2008	Diffuse	Lake Mjøsa			Brown trout	Salmo trutta	Muscle	59	2410	<1,314		<1,177	<1,056	<1,384	<1,24	<2,47	<2,51						<0,205		<0,147		2.95			<0,105		0.448
	2008	Diffuse	Lake Mjøsa			Brown trout	Salmo trutta	Muscle	56	2150	<1,338		<1,05	<1,444	<1,404	<1,223	<3,2	<2,175						<0,288		<0,81		1.486			<0,135		0.289
	2008	Diffuse	Lake Mjøsa			Brown trout	Salmo trutta	Muscle	61	2250	<1,24		<1,186	<1,216	<1,477	<0,926	<3,128	2.18						<0,211		<0,216		3.75			<0,128		0.893
	2008	Diffuse	Lake Mjøsa			Brown trout	Salmo trutta	Muscle	60	2240	<0,771		<0,663	<0,888	<0,922	<1,114	<2,724	2.066						<0,177		<0,114		1.959			<0,078		<0,116
	2008	Diffuse	Lake Mjøsa			Brown trout	Salmo trutta	Muscle	50	1400	<0,952		<1,01	<0,909	<1,108	<0,956	<1,722	3.706						<0,251		<0,121		3.265			<0,097		0.222
	2008	Diffuse	Lake Mjøsa			Brown trout	Salmo trutta	Muscle	50	1470	<0,988		<0,794	<1,166	<1,063	<1,855	<1,734	<1,414						<0,255		<0,123		0.913			<0,095		0.146
	2008	Diffuse	Lake Mjøsa			Brown trout	Salmo trutta	Muscle	54	2125	<0,743		<0,758	<0,568	<0,586	<0,644	<0,856	<0,513						<0,192		<0,099		0.381			<0,11		0.638
	2008	Diffuse	Lake Mjøsa			Brown trout	Salmo trutta	Muscle	54.2	1700	<0,857		<0,985	<0,627	<0,743	<0,754	<0,859	<0,676						<0,219		<0,135		0.707			<0,136		1.066
	2013	Diffuse	Lake Mjøsa			Brown trout	Salmo trutta	Muscle	81	6810	<2		<0,5	<0,5	<0,5	<0,6	0.5	0.7						<0,1		<0,1		0.45			<0,2		<0,05
	2013	Diffuse	Lake Mjøsa			Brown trout	Salmo trutta	Muscle	71.5	4075	<2		<0,5	<0,5	<0,5	<0,6	0.5	0.7						<0,1		<0,1		0.2			<0,2		0.09
	2013	Diffuse	Lake Mjøsa			Brown trout	Salmo trutta	Muscle	66.5	3250	<2		<0,5	<0,5	<0,5	<0,6	0.5	0.94						<0,1		<0,1		0.55			<0,2		0.09
	2013	Diffuse	Lake Mjøsa			Brown trout	Salmo trutta	Muscle	63.2	3580	<2		<0,5	<0,5	<0,5	<0,6	0.5	<0,4						<0,1		<0,1		0.2			<0,2		<0,05
	2013	Diffuse	Lake Mjøsa			Brown trout	Salmo trutta	Muscle	67.5	2830	<2		<0,5	<0,5	<0,5	<0,6	0.5	0.84						<0,1		<0,1		0.37			<0,2		0.06
	2013	Diffuse	Lake Mjøsa			Brown trout	Salmo trutta	Muscle	56.5	2210	<2		<0,5	<0,5	<0,5	<0,6	0.5	0.59						<0,1		<0,1		0.31			<0,2		<0,05
	2013	Diffuse	Lake Mjøsa			Brown trout	Salmo trutta	Muscle	55.1	1960	<2		<0,5	<0,5	<0,5	<0,6	0.5	0.77						<0,1		<0,1		0.41			<0,2		<0,05
	2013	Diffuse	Lake Mjøsa			Brown trout	Salmo trutta	Muscle	55	1590	<2		<0,5	<0,5	<0,5	<0,6	0.5	0.86						<0,1		<0,1		0.51			<0,2		0.06
	2013	Diffuse	Lake Mjøsa			Brown trout	Salmo trutta	Muscle	48.1	1200	<2		<0,5	<0,5	<0,5	<0,6	0.5	0.56						<0,1		<0,1		0.2			<0,2		<0,05
	2013	Diffuse	Lake Mjøsa			Brown trout	Salmo trutta	Muscle	58	2440	<2		<0,5	<0,5	<0,5	<0,6	0.5	0.45						<0,1		<0,1		0.23			<0,2		<0,05
	2013	Diffuse	Lake Mjøsa			Brown trout	Salmo trutta	Muscle	51.4	1625	<2		<0,5	<0,5	<0,5	<0,6	0.5	0.66						<0,1		<0,1		0.35			<0,2		0.09
	2013	Diffuse	Lake Mjøsa			Brown trout	Salmo trutta	Muscle	49.5	1395	<2		<0,5	<0,5	<0,5	<0,6	0.5	1.2						<0,1		<0,1		0.59			<0,2		<0,05
	2013	Diffuse	Lake Mjøsa			Brown trout	Salmo trutta	Muscle	52.3	1250	<2		<0,5	<0,5	<0,5	<0,6	0.5	0.46						<0,1		<0,1		0.22			<0,2		<0,05
	2013	Diffuse	Lake Mjøsa			Brown trout	Salmo trutta	Muscle	63.3	2790	<2		<0,5	<0,5	<0,5	<0,6	0.5	1.2						<0,1		<0,1		0.59			<0,2		<0,05
	2013	Diffuse	Lake Mjøsa			Brown trout	Salmo trutta	Muscle	54.7	1800	<2		<0,5	<0,5	<0,5	<0,6	0.5	0.63						<0,1		<0,1		0.37			<0,2		<0,05
	2014	Diffuse	Lake Mjøsa			Brown trout	Salmo trutta	Muscle	79.9	5682.5			<0,5	<0,5	<0,5	<0,5	<0,5	0.5						<0,1		<0,1		0.3			<0,2		<0,1
	2014	Diffuse	Lake Mjøsa			Brown trout	Salmo trutta	Muscle	63.8	2937.5			<0,5	<0,5	<0,5	<0,5	<0,5	0.4						<0,1		<0,1		0.3			<0,2		<0,1
	2014	Diffuse	Lake Mjøsa			Brown trout	Salmo trutta	Muscle	74	4953.8			<0,5	<0,5	<0,5	<0,5	<0,5	<0,4						<0,1		<0,1		0.2			<0,2		<0,1
	2015	Diffuse	Lake Mjøsa			Brown trout	Salmo trutta	Muscle	74.8	5432			<0,5	<0,5	<0,5	<0,5	<0,5	<0,5						<0,1		<0,1		0.27			<0,2		<0,1
	2015	Diffuse	Lake Mjøsa			Brown trout	Salmo trutta	Muscle	84.08	7754			<0,5	<0,5	<0,5	<0,5	<0,5	<0,5						<0,1		<0,1		0.25			<0,2		<0,1
	2015	Diffuse	Lake Mjøsa			Brown trout	Salmo trutta	Muscle	60.22	3000			<0,5	<0,5	<0,5	<0,5	0.11	<0,5						<0,1		<0,1		0.2			<0,2		<0,1
	2006	Diffuse	Lake Mjøsa			Brown trout	Salmo trutta	Muscle	55	1904																		1.86
	2016	Diffuse	Lake Mjøsa			Brown trout	Salmo trutta	Muscle					<0,1	<0,2		<0,5	<0,5	<0,4						<0,2		<0,1		0.2			<0,2		<0,1
	2016	Diffuse	Lake Mjøsa			Brown trout	Salmo trutta	Muscle					<0,1	<0,2		<0,5	<0,5	<0,4						<0,2		<0,1		0.3			<0,2		<0,1
	2016	Diffuse	Lake Mjøsa			Brown trout	Salmo trutta	Muscle					<0,1	<0,2		<0,5	<0,5	0.4						<0,2		<0,1		0.4			<0,2		<0,1
	2016	Long-range transport, rural	Lake Femunden			Whitefish	Coregonus lavaretus	Liver	37.2	586		<0,5	<0,5	0.7	<0,5	<0,5	0.6	2.7	0.6	5.4	0.6	1		<0,2	<0,2	<0,1	<0,2	1		<0,2	<0,2	<0,2	<0,1	<0,3	<0,3	<5	<5		<0,3	<0,3	<0,3	<0,3	<0,3
	2016	Long-range transport, rural	Lake Femunden			Whitefish	Coregonus lavaretus	Liver	39.1	565		<0,5	<0,5	0.6	0.7	<0,5	0.6	4	1.9	13.1	2.8	2.8		<0,2	<0,2	<0,1	<0,2	2.3		<0,2	<0,2	<0,2	0.2	<0,3	<0,3	<5	<5		<0,3	<0,3	<0,3	<0,3	<0,3
	2016	Long-range transport, rural	Lake Femunden			Whitefish	Coregonus lavaretus	Liver	33.5	427		<0,5	<0,5	<0,5	<0,5	0.8	0.7	1.8	<0,4	2.5	<0,4	<0,4		<0,2	<0,2	<0,1	<0,2	0.8		<0,2	<0,2	<0,2	0.3	<0,3	<0,3	<5	<5		<0,3	<0,3	<0,3	<0,3	<0,3
	2016	Long-range transport, rural	Lake Femunden			Whitefish	Coregonus lavaretus	Liver	33	418		<0,5	<0,5	<0,5	<0,5	1.5	1	4	2.3	9.2	1.6	1		<0,2	<0,2	<0,1	<0,2	4.1		<0,2	<0,2	<0,2	<0,1	<0,3	<0,3	<5	<5		<0,3	<0,3	<0,3	<0,3	<0,3
	2016	Long-range transport, rural	Lake Femunden			Whitefish	Coregonus lavaretus	Liver	32.5	404		<0,5	<0,5	<0,5	<0,5	<0,5	1.2	5	2	7	1.1	0.9		<0,2	<0,2	<0,1	<0,2	8.7		<0,2	<0,2	<0,2	<0,1	<0,3	<0,3	<5	<5		<0,3	<0,3	<0,3	<0,3	<0,3
	2016	Long-range transport, rural	Lake Femunden			Whitefish	Coregonus lavaretus	Liver	35.7	491		<0,5	<0,5	<0,5	<0,5	<0,5	0.5	3.1	1.6	11.3	1.8	1.1		<0,2	<0,2	<0,1	<0,2	6.3		<0,2	<0,2	<0,2	<0,1	<0,3	<0,3	<5	<5		<0,3	<0,3	<0,3	<0,3	<0,3
	2016	Long-range transport, rural	Lake Femunden			Whitefish	Coregonus lavaretus	Liver	35.2	429		<0,5	<0,5	<0,5	<0,5	1.4	0.6	1.9	1	4.3	0.9	0.6		<0,2	<0,2	<0,1	<0,2	1		<0,2	<0,2	<0,2	0.2	<0,3	<0,3	<5	<5		<0,3	<0,3	<0,3	<0,3	<0,3
	2016	Long-range transport, rural	Lake Femunden			Whitefish	Coregonus lavaretus	Liver	34.4	423		<0,5	<0,5	0.9	0.6	<0,5	<0,5	0.7	<0,4	1.2	<0,4	<0,4		<0,2	<0,2	<0,1	<0,2	0.8		<0,2	<0,2	<0,2	0.1	<0,3	<0,3	<5	<5		<0,3	<0,3	<0,3	<0,3	<0,3
	2016	Long-range transport, rural	Lake Femunden			Whitefish	Coregonus lavaretus	Liver	35.6	495		<0,5	<0,5	<0,5	<0,5	<0,5	0.5	2.9	1.7	9.9	1.8	2.2		<0,2	<0,2	<0,1	<0,2	2.7		<0,2	<0,2	<0,2	0.1	<0,3	<0,3	<5	<5		<0,3	<0,3	<0,3	<0,3	<0,3
	2016	Long-range transport, rural	Lake Femunden			Whitefish	Coregonus lavaretus	Liver	33	376		<0,5	<0,5	<0,5	<0,5	<0,5	<0,5	2.1	0.8	6.9	1.2	1.2		<0,2	<0,2	<0,1	<0,2	2.8		<0,2	<0,2	<0,2	<0,1	<0,3	<0,3	<5	<5		<0,3	<0,3	<0,3	<0,3	<0,3
	2016	Long-range transport, rural	Lake Femunden			Whitefish	Coregonus lavaretus	Liver	35.2	485		<0,5	<0,5	<0,5	0.6	<0,5	<0,5	2.9	1.2	7.9	1.6	1.4		<0,2	<0,2	<0,1	<0,2	4.1		<0,2	<0,2	<0,2	0.1	<0,3	<0,3	<5	<5		<0,3	<0,3	<0,3	<0,3	<0,3
	2016	Long-range transport, rural	Lake Femunden			Whitefish	Coregonus lavaretus	Liver	37	543		<0,5	<0,5	<0,5	<0,5	<0,5	0.8	4.5	2.3	14.3	2.5	2.3		<0,2	<0,2	<0,1	<0,2	3.2		<0,2	<0,2	<0,2	0.2	<0,3	<0,3	<5	<5		<0,3	<0,3	<0,3	<0,3	<0,3
	2016	Long-range transport, rural	Lake Femunden			Whitefish	Coregonus lavaretus	Muscle	34.5	451.6		<0,5	<0,5	<0,5	<0,5	<0,5	<0,5	<0,4	<0,4	0.7	<0,4	<0,4		<0,2	<0,2	<0,1	<0,2	0.1		<0,2	<0,2	<0,2	<0,1	<0,3	<0,3	<5	<5		<0,3	<0,3	<0,3	<0,3	<0,3
	2016	Long-range transport, rural	Lake Femunden			Whitefish	Coregonus lavaretus	Muscle	33.8	407.6		<0,5	<0,5	<0,5	<0,5	<0,5	<0,5	<0,4	<0,4	0.8	<0,4	<0,4		<0,2	<0,2	<0,1	<0,2	0		<0,2	<0,2	<0,2	<0,1	<0,3	<0,3	<5	<5		<0,3	<0,3	<0,3	<0,3	<0,3
	2016	Long-range transport, rural	Lake Femunden			Whitefish	Coregonus lavaretus	Muscle	37.34	612.6		<0,5	<0,5	<0,5	<0,5	<0,5	<0,5	<0,4	<0,4	0.5	<0,4	<0,4		<0,2	<0,2	<0,1	<0,2	0		<0,2	<0,2	<0,2	<0,1	<0,3	<0,3	<5	<5		<0,3	<0,3	<0,3	<0,3	<0,3
	2015	Long-range transport, rural	Lake Femunden			Whitefish	Coregonus lavaretus	Liver	32.7	444		<0,5	<0,5	<0,5	<0,5	<0,5	0.9	5	2.8	15.5	1.7			<0,1		<0,1		3.5			<0,2	<0,2	0.2	<0,3	<0,3	<5	<5		<0,3	<0,3		<0,3	<0,3
	2015	Long-range transport, rural	Lake Femunden			Whitefish	Coregonus lavaretus	Liver	35.7	492		<0,5	<0,5	<0,5	<0,5	<0,5	0.9	4.6	3.1	30	4.2			<0,1		<0,1		2			<0,2	<0,2	0.2	<0,3	<0,3	<5	<5		<0,3	<0,3		<0,3	<0,3
	2015	Long-range transport, rural	Lake Femunden			Whitefish	Coregonus lavaretus	Liver	34.3	413		<0,5	<0,5	<0,5	<0,5	<0,5	<0,5	0.9	0.9	4	0.7			<0,1		<0,1		1.1			<0,2	<0,2	0.3	<0,3	<0,3	<5	<5		<0,3	<0,3		<0,3	<0,3
	2015	Long-range transport, rural	Lake Femunden			Whitefish	Coregonus lavaretus	Liver	36	498		<0,5	<0,5	<0,5	<0,5	<0,5	0.6	3.8	2.3	17.9	2.1			<0,1		<0,1		2.5			<0,2	<0,2	0.3	<0,3	<0,3	<5	<5		<0,3	<0,3		<0,3	<0,3
	2015	Long-range transport, rural	Lake Femunden			Whitefish	Coregonus lavaretus	Liver	33.8	411		<0,5	<0,5	<0,5	<0,5	1.1	1.4	7.9	4.8	22.7	2.5			<0,1		<0,1		4.1			<0,2	<0,2	0.5	<0,3	<0,3	<5	<5		<0,3	<0,3		<0,3	<0,3
	2015	Long-range transport, rural	Lake Femunden			Whitefish	Coregonus lavaretus	Liver	32.3	371		<0,5	<0,5	<0,5	<0,5	<0,5	<0,5	1.1	1.6	9.2	1.5			<0,1		<0,1		2.3			<0,2	<0,2	0.3	<0,3	<0,3	<5	<5		<0,3	<0,3		<0,3	<0,3
	2015	Long-range transport, rural	Lake Femunden			Whitefish	Coregonus lavaretus	Liver	35.9	439		<0,5	<0,5	<0,5	<0,5	<0,5	<0,5	2.2	1.3	9.9	1.5			<0,1		<0,1		1.4			<0,2	<0,2	0.4	<0,3	<0,3	<5	<5		<0,3	<0,3		<0,3	<0,3
	2015	Long-range transport, rural	Lake Femunden			Whitefish	Coregonus lavaretus	Liver	35.7	465		<0,5	<0,5	<0,5	<0,5	<0,5	0.5	2.5	2	13.7	1.7			<0,1		<0,1		1.5			<0,2	<0,2	0.3	<0,3	<0,3	<5	<5		<0,3	<0,3		<0,3	<0,3
	2015	Long-range transport, rural	Lake Femunden			Whitefish	Coregonus lavaretus	Liver	32.9	383		<0,5	<0,5	<0,5	<0,5	<0,5	<0,5	1	0.5	5.2	0.8			<0,1		<0,1		0.8			<0,2	<0,2	0.3	<0,3	<0,3	<5	<5		<0,3	<0,3		<0,3	<0,3
	2015	Long-range transport, rural	Lake Femunden			Whitefish	Coregonus lavaretus	Liver	32.2	380		<0,5	<0,5	<0,5	<0,5	<0,5	<0,5	2.1	1.3	11.4	1.4			<0,1		<0,1		3.1			<0,2	<0,2	0.3	<0,3	<0,3	<5	<5		<0,3	<0,3		<0,3	<0,3
	2015	Long-range transport, rural	Lake Femunden			Whitefish	Coregonus lavaretus	Liver	35.8	499		<0,5	<0,5	<0,5	<0,5	<0,5	0.8	4.3	2.5	17.5	2			<0,1		<0,1		2.2			<0,2	<0,2	0.2	<0,3	<0,3	<5	<5		<0,3	<0,3		<0,3	<0,3
	2015	Long-range transport, rural	Lake Femunden			Whitefish	Coregonus lavaretus	Liver	36	500		<0,5	<0,5	<0,5	<0,5	<0,5	0.7	2.5	1.7	9.1	1			<0,1		<0,1		1.6			<0,2	<0,2	0.4	<0,3	<0,3	<5	<5		<0,3	<0,3		<0,3	<0,3
	2015	Long-range transport, rural	Lake Femunden			Whitefish	Coregonus lavaretus	Muscle	34.68	461.75		<0,5	<0,5	<0,5	<0,5	<0,5	<0,5	<0,5	<0,4	1.3	<0,4			<0,1		<0,1		<0,1			<0,2	<0,2	<0,1	<0,3	<0,3	<5	<5		<0,3	<0,3		<0,3	<0,3
	2015	Long-range transport, rural	Lake Femunden			Whitefish	Coregonus lavaretus	Muscle	34.4	421.5		<0,5	<0,5	<0,5	<0,5	<0,5	<0,5	<0,5	<0,4	1	<0,4			<0,1		<0,1		<0,1			<0,2	<0,2	<0,1	<0,3	<0,3	<5	<5		<0,3	<0,3		<0,3	<0,3
	2015	Long-range transport, rural	Lake Femunden			Whitefish	Coregonus lavaretus	Muscle	34.225	440.5		<0,5	<0,5	<0,5	<0,5	<0,5	<0,5	<0,5	<0,4	0.8	<0,4			<0,1		<0,1		<0,1			<0,2	<0,2	<0,1	<0,3	<0,3	<5	<5		<0,3	<0,3		<0,3	<0,3
	2014	Long-range transport, rural	Lake Femunden			Whitefish	Coregonus lavaretus	Liver	35.4	492		<1	<0,5	<0,5	<0,5	<0,5	0.8	2.1	2.4	8	1.7			<0,1		<0,1		2.9			<0,2	<0,2	0.6	<0,3	<0,3	<5	<5		<0,3	<0,3		0.5
	2014	Long-range transport, rural	Lake Femunden			Whitefish	Coregonus lavaretus	Liver	34.5	417		<1	<0,5	<0,5	<0,5	<0,5	1.1	1.9	1.8	5.7	0.5			<0,1		<0,1		2.6			<0,2	<0,2	0.6	<0,3	<0,3	<5	<5		<0,3	<0,3		<0,3
	2014	Long-range transport, rural	Lake Femunden			Whitefish	Coregonus lavaretus	Liver	34	466		<1	<0,5	<0,5	<0,5	<0,5	1.1	3.4	2.4	15.1	1.9			<0,1		<0,1		4			<0,2	<0,2	0.6	<0,3	<0,3	<5	<5		<0,3	<0,3		0.3
	2014	Long-range transport, rural	Lake Femunden			Whitefish	Coregonus lavaretus	Liver	33.3	410		<1	<0,5	<0,5	<0,5	<0,5	0.9	2.2	1.4	8.8	1.1			<0,1		<0,1		2.1			<0,2	<0,2	0.5	<0,3	<0,3	<5	<5		<0,3	<0,3		<0,3
	2014	Long-range transport, rural	Lake Femunden			Whitefish	Coregonus lavaretus	Liver	34	431		<1	<0,5	<0,5	<0,5	<0,5	1	2.9	2.1	9.3	1.5			<0,1		<0,1		5.2			<0,2	<0,2	0.5	<0,3	<0,3	<5	<5		<0,3	<0,3		<0,3
	2014	Long-range transport, rural	Lake Femunden			Whitefish	Coregonus lavaretus	Liver	34.2	426		<1	<0,5	<0,5	<0,5	<0,5	0.9	1.9	1.8	7.4	0.8			<0,1		<0,1		2.1			<0,2	<0,2	0.6	<0,3	<0,3	<5	<5		<0,3	<0,3		<0,3
	2014	Long-range transport, rural	Lake Femunden			Whitefish	Coregonus lavaretus	Liver	31.5	351		<1	<0,5	<0,5	<0,5	<0,5	1.8	2.3	3	6.2	1.2			<0,1		<0,1		3.4			<0,2	<0,2	0.9	<0,3	<0,3	<5	<5		<0,3	<0,3		<0,3
	2014	Long-range transport, rural	Lake Femunden			Whitefish	Coregonus lavaretus	Liver	33	389		<1	<0,5	<0,5	<0,5	<0,5	<0,5	0.7	0.5	1.8	0.6			<0,1		<0,1		0.4			<0,2	<0,2	0.5	<0,3	<0,3	<5	<5		<0,3	<0,3		<0,3
	2014	Long-range transport, rural	Lake Femunden			Whitefish	Coregonus lavaretus	Liver	33.4	382		<1	<0,5	<0,5	<0,5	<0,5	0.8	2	1.1	4.3	0.5			<0,1		<0,1		0.8			<0,2	<0,2	<0,1	<0,3	<0,3	<5	<5		<0,3	<0,3		<0,3
	2014	Long-range transport, rural	Lake Femunden			Whitefish	Coregonus lavaretus	Liver	33.1	403		<1	<0,5	<0,5	<0,5	<0,5	0.7	1.1	0.6	2.4	0.7			<0,1		<0,1		0.5			<0,2	<0,2	0.7	<0,3	<0,3	<5	<5		<0,3	<0,3		<0,3
	2014	Long-range transport, rural	Lake Femunden			Whitefish	Coregonus lavaretus	Liver	36.4	479		<1	<0,5	<0,5	<0,5	<0,5	0.7	2.4	1	3.6	1.1			<0,1		<0,1		1.5			<0,2	<0,2	0.4	<0,3	<0,3	<5	<5		<0,3	<0,3		<0,3
	2014	Long-range transport, rural	Lake Femunden			Whitefish	Coregonus lavaretus	Liver	36.5	506		<1	<0,5	<0,5	<0,5	<0,5	0.8	1.5	1.9	7	1.1			<0,1		<0,1		0.7			<0,2	<0,2	0.8	<0,3	<0,3	<5	<5		<0,3	<0,3		<0,3
	2014	Long-range transport, rural	Lake Femunden			Whitefish	Coregonus lavaretus	Muscle	34.24	443.2		<1	<0,5	<0,5	<0,5	<0,5	<0,5	<0,4	<0,4	1.9	<0,4			<0,1		<0,1		<0,1			<0,2	<0,2	<0,1	<0,3	<0,3	<5	<5		<0,3	<0,3		<0,3
	2014	Long-range transport, rural	Lake Femunden			Whitefish	Coregonus lavaretus	Muscle	33.04	390.2		<1	<0,5	<0,5	<0,5	<0,5	<0,5	<0,4	<0,4	1.4	<0,4			<0,1		<0,1		<0,1			<0,2	<0,2	<0,1	<0,3	<0,3	<5	<5		<0,3	<0,3		<0,3
	2014	Long-range transport, rural	Lake Femunden			Whitefish	Coregonus lavaretus	Muscle	38.14	616		<1	<0,5	<0,5	<0,5	<0,5	<0,5	<0,4	<0,4	0.8	<0,4			<0,1		<0,1		<0,1			<0,2	<0,2	<0,1	<0,3	<0,3	<5	<5		<0,3	<0,3		<0,3
	2013	Long-range transport, rural	Lake Femunden			Whitefish	Coregonus lavaretus	Muscle	33	420		<2	<0,5	<0,5	<0,5	<0,6	<0,5	<0,4	<0,4	1.1	<0,4			<0,1		<0,1		<0,05		<0,2	<0,2	<0,2	<0,05	<0,3	<0,3	<5	<5					0.54
	2013	Long-range transport, rural	Lake Femunden			Whitefish	Coregonus lavaretus	Muscle	35.5	451		<2	<0,5	<0,5	<0,5	<0,6	<0,5	<0,4	<0,4	0.77	<0,4			<0,1		<0,1		<0,05		<0,2	<0,2	<0,2	<0,05	<0,3	<0,3	<5	<5					<0,3
	2013	Long-range transport, rural	Lake Femunden			Whitefish	Coregonus lavaretus	Muscle	34.3	434		<2	<0,5	<0,5	<0,5	<0,6	<0,5	<0,4	<0,4	0.94	<0,4			<0,1		<0,1		<0,05		<0,2	<0,2	<0,2	<0,05	<0,3	<0,3	<5	<5					<0,3
	2013	Long-range transport, rural	Lake Femunden			Whitefish	Coregonus lavaretus	Muscle	39	559		<2	<0,5	<0,5	<0,5	<0,6	<0,5	<0,4	<0,4	0.61	<0,4			<0,1		<0,1		<0,05		<0,2	<0,2	<0,2	<0,05	<0,3	<0,3	<5	<5					<0,3
	2013	Long-range transport, rural	Lake Femunden			Whitefish	Coregonus lavaretus	Muscle	36.6	504		<2	<0,5	<0,5	<0,5	<0,6	<0,5	<0,4	<0,4	0.71	<0,4			<0,1		<0,1		<0,05		<0,2	<0,2	<0,2	<0,05	<0,3	<0,3	<5	<5					<0,3
	2013	Long-range transport, rural	Lake Femunden			Whitefish	Coregonus lavaretus	Muscle	35	530		<2	<0,5	<0,5	<0,5	<0,6	<0,5	<0,4	<0,4	1.2	<0,4			<0,1		<0,1		<0,05		<0,2	<0,2	<0,2	<0,05	<0,3	<0,3	<5	<5					<0,3
	2013	Long-range transport, rural	Lake Femunden			Whitefish	Coregonus lavaretus	Muscle	36.4	512		<2	<0,5	<0,5	<0,5	<0,6	<0,5	<0,4	<0,4	2.2	<0,4			<0,1		<0,1		<0,05		<0,2	<0,2	<0,2	<0,05	<0,3	<0,3	<5	<5					<0,3
	2013	Long-range transport, rural	Lake Femunden			Whitefish	Coregonus lavaretus	Muscle	36	489		<2	<0,5	<0,5	<0,5	<0,6	<0,5	<0,4	<0,4	0.71	<0,4			<0,1		<0,1		<0,05		<0,2	<0,2	<0,2	<0,05	<0,3	<0,3	<5	<5					<0,3
	2013	Long-range transport, rural	Lake Femunden			Whitefish	Coregonus lavaretus	Muscle	36.3	552		<2	<0,5	<0,5	<0,5	<0,6	<0,5	<0,4	<0,4	0.62	<0,4			<0,1		<0,1		<0,05		<0,2	<0,2	<0,2	<0,05	<0,3	<0,3	<5	<5					<0,3
	2013	Long-range transport, rural	Lake Femunden			Whitefish	Coregonus lavaretus	Muscle	35.5	510		<2	<0,5	<0,5	<0,5	<0,6	<0,5	<0,4	<0,4	0.96	<0,4			<0,1		<0,1		<0,05		<0,2	<0,2	<0,2	<0,05	<0,3	<0,3	<5	<5					<0,3
	2013	Long-range transport, rural	Lake Femunden			Whitefish	Coregonus lavaretus	Muscle	34.8	481		<2	<0,5	<0,5	<0,5	<0,6	<0,5	<0,4	<0,4	0.64	<0,4			<0,1		<0,1		<0,05		<0,2	<0,2	<0,2	<0,05	<0,3	<0,3	<5	<5					<0,3
	2013	Long-range transport, rural	Lake Femunden			Whitefish	Coregonus lavaretus	Muscle	34.5	426		<2	<0,5	<0,5	<0,5	<0,6	<0,5	<0,4	<0,4	0.68	<0,4			<0,1		<0,1		<0,05		<0,2	<0,2	<0,2	<0,05	<0,3	<0,3	<5	<5					<0,3
	2013	Long-range transport, rural	Lake Femunden			Whitefish	Coregonus lavaretus	Muscle	35.4	453		<2	<0,5	<0,5	<0,5	<0,6	<0,5	<0,4	<0,4	0.58	<0,4			<0,1		<0,1		<0,05		<0,2	<0,2	<0,2	<0,05	<0,3	<0,3	<5	<5					<0,3
	2013	Long-range transport, rural	Lake Femunden			Whitefish	Coregonus lavaretus	Muscle	34.5	427		<2	<0,5	<0,5	<0,5	<0,6	<0,5	<0,4	<0,4	0.98	<0,4			<0,1		<0,1		<0,05		<0,2	<0,2	<0,2	<0,05	<0,3	<0,3	<5	<5					<0,3
	2013	Long-range transport, rural	Lake Femunden			Whitefish	Coregonus lavaretus	Muscle	35	454		<2	<0,5	<0,5	<0,5	<0,6	<0,5	<0,4	<0,4	0.4	<0,4			<0,1		<0,1		<0,05		<0,2	<0,2	<0,2	<0,05	<0,3	<0,3	<5	<5					<0,3
	2016	Long-range transport, rural	Lake Randsfjorden			European smelt	Osmerus eperlanus	Liver	11.7	8.68		<0,5	<0,5	0.6	1.9	<0,5	<0,5	1.6	0.5	3.5	0.4	<0,4		<0,2	<0,2	<0,1	<0,2	0.8		<0,2	<0,2	<0,2	<0,1	<0,3	<0,3	<5	<5		<0,3	<0,3	<0,3	<0,3	<0,3
	2016	Long-range transport, rural	Lake Randsfjorden			European smelt	Osmerus eperlanus	Liver	11.32	7.86		<0,5	<0,5	<0,5	0.9	<0,5	<0,5	2	1.2	6	0.6	<0,4		<0,2	<0,2	<0,1	<0,2	1.1		<0,2	<0,2	<0,2	<0,1	<0,3	<0,3	<5	<5		<0,3	<0,3	<0,3	<0,3	<0,3
	2016	Long-range transport, rural	Lake Randsfjorden			European smelt	Osmerus eperlanus	Liver	11.3	8.42		<0,5	<0,5	<0,5	<0,5	<0,5	<0,5	2	1.1	5.8	0.5	<0,4		<0,2	<0,2	<0,1	<0,2	0.7		<0,2	<0,2	<0,2	<0,1	<0,3	<0,3	<5	<5		<0,3	<0,3	<0,3	<0,3	<0,3
	2016	Long-range transport, rural	Lake Randsfjorden			European smelt	Osmerus eperlanus	Liver	11.475	8.75		<0,5	<0,5	<0,5	0.7	<0,5	<0,5	2.4	1	4	0.7	<0,4		<0,2	<0,2	<0,1	<0,2	0.8		<0,2	<0,2	<0,2	<0,1	<0,3	<0,3	<5	<5		<0,3	<0,3	<0,3	<0,3	<0,3
	2016	Long-range transport, rural	Lake Randsfjorden			European smelt	Osmerus eperlanus	Liver	11.275	8.125		<0,5	<0,5	<0,5	<0,5	<0,5	<0,5	1.8	1.4	5.3	0.6	<0,4		<0,2	<0,2	<0,1	<0,2	0.9		<0,2	<0,2	<0,2	<0,1	<0,3	<0,3	<5	<5		<0,3	<0,3	<0,3	<0,3	<0,3
	2016	Long-range transport, rural	Lake Randsfjorden			European smelt	Osmerus eperlanus	Liver	10.82	7.14		<0,5	<0,5	1.2	3.2	<0,5	<0,5	1.9	0.9	4.2	0.5	<0,4		<0,2	<0,2	<0,1	<0,2	0.9		<0,2	<0,2	<0,2	<0,1	<0,3	<0,3	<5	<5		<0,3	<0,3	<0,3	<0,3	<0,3
	2016	Long-range transport, rural	Lake Randsfjorden			European smelt	Osmerus eperlanus	Liver	11.26	8.24		<0,5	<0,5	<0,5	0.7	<0,5	<0,5	3.1	1.5	7.3	1	<0,4		<0,2	<0,2	<0,1	<0,2	1.6		<0,2	<0,2	<0,2	0.2	<0,3	<0,3	<5	<5		<0,3	<0,3	<0,3	<0,3	<0,3
	2016	Long-range transport, rural	Lake Randsfjorden			European smelt	Osmerus eperlanus	Liver	11.68	8.88		<0,5	<0,5	<0,5	<0,5	<0,5	<0,5	2.3	0.9	5.5	0.8	<0,4		<0,2	<0,2	<0,1	<0,2	1.2		<0,2	<0,2	<0,2	0.1	<0,3	<0,3	<5	<5		<0,3	<0,3	<0,3	<0,3	<0,3
	2016	Long-range transport, rural	Lake Randsfjorden			European smelt	Osmerus eperlanus	Liver	11.3	7.42		<0,5	<0,5	<0,5	<0,5	<0,5	<0,5	<0,4	<0,4	0.6	<0,4	<0,4		<0,2	<0,2	<0,1	<0,2	0.2		<0,2	<0,2	<0,2	<0,1	<0,3	<0,3	<5	<5		<0,3	<0,3	<0,3	<0,3	<0,3
	2016	Long-range transport, rural	Lake Randsfjorden			European smelt	Osmerus eperlanus	Liver	11.44	8.4		<0,5	<0,5	<0,5	<0,5	<0,5	<0,5	1.6	<0,4	3.9	<0,4	<0,4		<0,2	<0,2	<0,1	<0,2	0.7		<0,2	<0,2	<0,2	<0,1	<0,3	<0,3	<5	<5		<0,3	<0,3	<0,3	<0,3	<0,3
	2016	Long-range transport, rural	Lake Randsfjorden			Arctic char	Salvelinus alpinus	Liver	42	860		<0,5	<0,5	<0,5	<0,5	<0,5	0.8	4	2.4	8.4	1.2	<0,4		<0,2	<0,2	<0,1	<0,2	8.5		<0,2	<0,2	<0,2	0.3	<0,3	<0,3	<5	<5		<0,3	<0,3	<0,3	<0,3	<0,3
	2016	Long-range transport, rural	Lake Randsfjorden			Arctic char	Salvelinus alpinus	Liver	39.5	590		<0,5	<0,5	<0,5	<0,5	<0,5	0.6	2.6	1.4	5.9	1	0.4		<0,2	<0,2	<0,1	<0,2	4.3		<0,2	<0,2	<0,2	<0,1	<0,3	<0,3	<5	<5		<0,3	<0,3	<0,3	<0,3	<0,3
	2016	Long-range transport, rural	Lake Randsfjorden			Brown trout	Salmo trutta	Liver	52.1	1760		<0,5	<0,5	<0,5	<0,5	1	2.9	13.2	9.9	37.1	4.5	0.1		<0,2	<0,2	<0,1	<0,2	4.8		<0,2	<0,2	<0,2	1.1	<0,3	<0,3	<5	<5		<0,3	<0,3	0.3	<0,3	0.7
	2016	Long-range transport, rural	Lake Randsfjorden			Brown trout	Salmo trutta	Liver	49	1420		<0,5	<0,5	<0,5	<0,5	0.5	1.6	7.5	6.1	20	3.4	1.7		<0,2	<0,2	<0,1	<0,2	4.2		<0,2	<0,2	<0,2	0.8	<0,3	<0,3	<5	<5		<0,3	<0,3	<0,3	<0,3	<0,3
	2016	Long-range transport, rural	Lake Randsfjorden			Brown trout	Salmo trutta	Liver	53.6	1740		<0,5	<0,5	<0,5	<0,5	0.6	2.2	8.2	6.8	28.8	3.2	2.1		<0,2	<0,2	<0,1	<0,2	5		<0,2	<0,2	<0,2	0.6	<0,3	<0,3	<5	<5		<0,3	<0,3	<0,3	<0,3	<0,3
	2016	Long-range transport, rural	Lake Randsfjorden			Brown trout	Salmo trutta	Liver	51.4	1500		<0,5	<0,5	<0,5	<0,5	0.7	2.4	12.2	9	42.5	4.1	3.5		<0,2	<0,2	<0,1	<0,2	5.8		<0,2	<0,2	<0,2	1.3	<0,3	<0,3	<5	<5		<0,3	<0,3	<0,3	<0,3	<0,3
	2016	Long-range transport, rural	Lake Randsfjorden			Brown trout	Salmo trutta	Liver	54.8	1650		<0,5	<0,5	<0,5	<0,5	0.9	2.7	13.4	10.4	43.8	3.7	4.4		<0,2	<0,2	<0,1	<0,2	6.5		<0,2	<0,2	<0,2	1.1	<0,3	<0,3	<5	<5		<0,3	<0,3	<0,3	<0,3	<0,3
	2016	Long-range transport, rural	Lake Randsfjorden			Brown trout	Salmo trutta	Liver	59.3	1990		<0,5	<0,5	<0,5	<0,5	0.5	1.6	4.2	2.2	5.8	1	0.6		<0,2	<0,2	<0,1	<0,2	2.4		<0,2	<0,2	<0,2	1.1	<0,3	<0,3	<5	<5		<0,3	<0,3	<0,3	<0,3	0.3
	2016	Long-range transport, rural	Lake Randsfjorden			Brown trout	Salmo trutta	Liver	61.8	4310		<0,5	<0,5	<0,5	<0,5	1.4	5.3	25.2	20.4	115	8.8	10.7		<0,2	<0,2	<0,1	<0,2	13.8		<0,2	<0,2	<0,2	1.3	<0,3	<0,3	<5	<5		<0,3	<0,3	<0,3	<0,3	<0,3
	2016	Long-range transport, rural	Lake Randsfjorden			Brown trout	Salmo trutta	Liver	64.3	2980		<0,5	<0,5	<0,5	0.5	0.5	1.5	9.1	7.8	32.7	4.6	2.6		<0,2	<0,2	<0,1	<0,2	4.7		<0,2	<0,2	<0,2	0.7	<0,3	<0,3	<5	<5		<0,3	<0,3	<0,3	<0,3	<0,3
	2016	Long-range transport, rural	Lake Randsfjorden			Brown trout	Salmo trutta	Liver	64.9	2630		<0,5	<0,5	<0,5	<0,5	<0,5	1.6	6.9	5	16.3	2.4	1.3		<0,2	<0,2	<0,1	<0,2	4.6		<0,2	<0,2	<0,2	0.5	<0,3	<0,3	<5	<5		<0,3	<0,3	<0,3	<0,3	<0,3
	2016	Long-range transport, rural	Lake Randsfjorden			Brown trout	Salmo trutta	Liver	52.8	1600		<0,5	<0,5	<0,5	<0,5	1.2	4.4	18.6	13	55.1	5.5	3.8		<0,2	<0,2	<0,1	<0,2	10.1		<0,2	<0,2	<0,2	1.3	<0,3	<0,3	<5	<5		<0,3	<0,3	<0,3	<0,3	<0,3
	2016	Long-range transport, rural	Lake Randsfjorden			Brown trout	Salmo trutta	Liver	44.5	897		<0,5	<0,5	<0,5	<0,5	0.7	1.4	4.1	2.9	5.2	0.5	0.2		<0,2	<0,2	<0,1	<0,2	1.5		<0,2	<0,2	<0,2	0.4	<0,3	<0,3	<5	<5		<0,3	<0,3	<0,3	<0,3	<0,3
	2016	Long-range transport, rural	Lake Randsfjorden			Brown trout	Salmo trutta	Liver	40.5	637		<0,5	<0,5	<0,5	<0,5	0.7	2.5	9.7	7.2	32.7	2.8	3.1		<0,2	<0,2	<0,1	<0,2	5.5		<0,2	<0,2	<0,2	0.8	<0,3	<0,3	<5	<5		<0,3	<0,3	<0,3	<0,3	<0,3
	2016	Long-range transport, rural	Lake Randsfjorden			Brown trout	Salmo trutta	Muscle				<0,5	<0,5	<0,5	<0,5	<0,5	<0,5	0.4	<0,4	0.7	0.1	<0,4		<0,2	<0,2	<0,1	<0,2	0.2		<0,2	<0,2	<0,2	<0,1	<0,3	<0,3	<5	<5		<0,3	<0,3	<0,3	<0,3	<0,3
	2016	Long-range transport, rural	Lake Randsfjorden			Brown trout	Salmo trutta	Muscle				<0,5	<0,5	<0,5	<0,5	<0,5	<0,5	0.7	0.4	1.1	<0,4	<0,4		<0,2	<0,2	<0,1	<0,2	0.2		<0,2	<0,2	<0,2	<0,1	<0,3	<0,3	<5	<5		<0,3	<0,3	<0,3	<0,3	<0,3
	2016	Long-range transport, rural	Lake Randsfjorden			Brown trout	Salmo trutta	Muscle				<0,5	<0,5	<0,5	<0,5	<0,5	<0,5	0.2	<0,4	0.4	<0,4	<0,4		<0,2	<0,2	<0,1	<0,2	0.1		<0,2	<0,2	<0,2	<0,1	<0,3	<0,3	<5	<5		<0,3	<0,3	<0,3	<0,3	<0,3
	2016	Long-range transport, rural	Lake Randsfjorden			European smelt	Osmerus eperlanus	Muscle				<0,5	<0,5	<0,5	<0,5	<0,5	<0,5	<0,4	<0,4	0.5	<0,4	<0,4		<0,2	<0,2	<0,1	<0,2	0.2		<0,2	<0,2	<0,2	<0,1	<0,3	<0,3	<5	<5		<0,3	<0,3	<0,3	<0,3	<0,3
	2016	Long-range transport, rural	Lake Randsfjorden			European smelt	Osmerus eperlanus	Muscle				<0,5	<0,5	<0,5	<0,5	<0,5	<0,5	<0,4	<0,4	0.5	<0,4	<0,4		<0,2	<0,2	<0,1	<0,2	0.2		<0,2	<0,2	<0,2	<0,1	<0,3	<0,3	<5	<5		<0,3	<0,3	<0,3	<0,3	<0,3
	2016	Long-range transport, rural	Lake Randsfjorden			European smelt	Osmerus eperlanus	Muscle				<0,5	<0,5	<0,5	<0,5	<0,5	<0,5	1.6	<0,4	2.6	<0,4	<0,4		<0,2	<0,2	<0,1	<0,2	0.6		<0,2	<0,2	<0,2	<0,1	<0,3	<0,3	<5	<5		<0,3	<0,3	<0,3	<0,3	<0,3
	2015	Long-range transport, rural	Lake Randsfjorden			European smelt	Osmerus eperlanus	Liver	8.68	8.75		<0,5	<0,5	<0,5	<0,5	1.13	1	5.4	4.4	9.8	2.4			<0,1		<0,1		2.7			<0,2	<0,2	0.5	<0,3	<0,3	<5	<5		<0,3	<0,3		<0,3	<0,3
	2015	Long-range transport, rural	Lake Randsfjorden			European smelt	Osmerus eperlanus	Liver	10.35	9.05		<0,5	<0,5	<0,5	<0,5	0.91	2	5.8	4.3	8.5	0.8			<0,1		<0,1		2.3			<0,2	<0,2	0.6	<0,3	<0,3	<5	<5		<0,3	<0,3		<0,3	<0,3
	2015	Long-range transport, rural	Lake Randsfjorden			European smelt	Osmerus eperlanus	Liver	10.475	9.7		<0,5	<0,5	<0,5	<0,5	1.11	2	7.1	5.1	13.3	2.8			<0,1		<0,1		2.7			<0,2	<0,2	0.5	<0,3	<0,3	<5	<5		<0,3	<0,3		<0,3	<0,3
	2015	Long-range transport, rural	Lake Randsfjorden			European smelt	Osmerus eperlanus	Liver	11.4	9.8		<0,5	<0,5	<0,5	<0,5	0.9	1.1	2.7	3.5	5.4	1.2			<0,1		<0,1		2.1			<0,2	<0,2	0.5	<0,3	<0,3	<5	<5		<0,3	<0,3		<0,3	<0,3
	2015	Long-range transport, rural	Lake Randsfjorden			European smelt	Osmerus eperlanus	Liver	11.2667	9.6		<0,5	<0,5	<0,5	<0,5	0.8	1.8	5.9	4.8	10.6	3.1			<0,1		<0,1		2.5			<0,2	<0,2	0.5	<0,3	<0,3	<5	<5		<0,3	<0,3		<0,3	<0,3
	2015	Long-range transport, rural	Lake Randsfjorden			European smelt	Osmerus eperlanus	Liver	11.0667	8		<0,5	<0,5	<0,5	<0,5	<0,5	3.3	3.8	2.8	5.8	2.6			<0,1		<0,1		2.8			<0,2	<0,2	0.8	<0,3	<0,3	<5	<5		<0,3	<0,3		<0,3	<0,3
	2015	Long-range transport, rural	Lake Randsfjorden			European smelt	Osmerus eperlanus	Liver	11.4	9.45		<0,5	<0,5	<0,5	<0,5	1.08	3.8	11.8	8.1	22	1.9			<0,1		<0,1		4			<0,2	<0,2	0.9	<0,3	<0,3	<5	<5		<0,3	<0,3		<0,3	<0,3
	2015	Long-range transport, rural	Lake Randsfjorden			European smelt	Osmerus eperlanus	Liver	11.1	10.35		<0,5	<0,5	<0,5	<0,5	0.7	2.2	5.1	3.4	7.2	<0,4			<0,1		<0,1		2.8			<0,2	<0,2	0.7	<0,3	<0,3	<5	<5		<0,3	<0,3		<0,3	<0,3
	2015	Long-range transport, rural	Lake Randsfjorden			European smelt	Osmerus eperlanus	Liver	11.7333	11.25		<0,5	<0,5	<0,5	<0,5	1.08	2.9	7.6	3.7	8.6	1.4			<0,1		<0,1		4.8			<0,2	<0,2	0.7	<0,3	<0,3	<5	<5		<0,3	<0,3		<0,3	<0,3
	2015	Long-range transport, rural	Lake Randsfjorden			Brown trout	Salmo trutta	Liver	29.6	341		<0,5	<0,5	<0,5	<0,5	<0,5	0.6	1.9	1.8	3.8	0.9			<0,1		<0,1		1.7			<0,2	<0,2	0.3	<0,3	<0,3	<5	<5		<0,3	<0,3		<0,3	<0,3
	2015	Long-range transport, rural	Lake Randsfjorden			Brown trout	Salmo trutta	Liver	33.4	450		<0,5	<0,5	<0,5	<0,5	<0,5	1.3	6.1	4.3	12	1.9			<0,1		<0,1		4			<0,2	<0,2	0.4	<0,3	<0,3	<5	<5		<0,3	<0,3		<0,3	<0,3
	2015	Long-range transport, rural	Lake Randsfjorden			Brown trout	Salmo trutta	Liver	35.8	543		<0,5	<0,5	<0,5	<0,5	<0,5	0.8	3.3	2.4	6.1	1.2			<0,1		<0,1		3.6			<0,2	<0,2	0.3	<0,3	<0,3	<5	<5		<0,3	<0,3		<0,3	<0,3
	2015	Long-range transport, rural	Lake Randsfjorden			Brown trout	Salmo trutta	Liver	38.7	750		<0,5	<0,5	<0,5	<0,5	0.7	1.4	4.7	3.5	7.7	1			<0,1		<0,1		3.4			<0,2	<0,2	0.6	<0,3	<0,3	<5	<5		<0,3	<0,3		<0,3	<0,3
	2015	Long-range transport, rural	Lake Randsfjorden			Brown trout	Salmo trutta	Liver	52.3	1710		<0,5	<0,5	<0,5	<0,5	1	3.5	14	10.4	31.3	3.5			<0,1		<0,1		8.3			<0,2	<0,2	0.8	<0,3	<0,3	<5	<5		<0,3	<0,3		<0,3	<0,3
	2015	Long-range transport, rural	Lake Randsfjorden			Brown trout	Salmo trutta	Liver	56.5	2260		<0,5	<0,5	<0,5	<0,5	0.7	2	9.4	5.7	15.7	1.9			<0,1		<0,1		4.2			<0,2	<0,2	1.9	<0,3	<0,3	<5	<5		<0,3	<0,3		<0,3	<0,3
	2015	Long-range transport, rural	Lake Randsfjorden			Brown trout	Salmo trutta	Liver	57.4	2140		<0,5	<0,5	<0,5	<0,5	0.74	1.9	7	5	11.5	1.9			<0,1		<0,1		4			<0,2	<0,2	0.8	<0,3	<0,3	<5	<5		<0,3	<0,3		<0,3	<0,3
	2015	Long-range transport, rural	Lake Randsfjorden			Brown trout	Salmo trutta	Liver	60.3	2170		<0,5	<0,5	<0,5	<0,5	<0,5	0.6	1.3	1.2	3.8	0.6			<0,1		<0,1		1.8			<0,2	<0,2	0.2	<0,3	<0,3	<5	<5		<0,3	<0,3		<0,3	<0,3
	2015	Long-range transport, rural	Lake Randsfjorden			Brown trout	Salmo trutta	Liver	61.9	2530		<0,5	<0,5	<0,5	<0,5	<0,5	1.5	5.1	3.8	10.9	1.5			<0,1		<0,1		2.7			<0,2	<0,2	1.3	<0,3	<0,3	<5	<5		<0,3	<0,3		<0,3	<0,3
	2015	Long-range transport, rural	Lake Randsfjorden			Brown trout	Salmo trutta	Liver	46.6	1330		<0,5	<0,5	<0,5	<0,5	<0,5	0.7	4.8	3.4	6.1	1			<0,1		<0,1		6.9			<0,2	<0,2	0.3	<0,3	<0,3	<5	<5		<0,3	<0,3		<0,3	<0,3
	2015	Long-range transport, rural	Lake Randsfjorden			Arctic char	Salvelinus alpinus	Liver	39.6	678		<0,5	<0,5	<0,5	<0,5	1.24	2	13.3	7.7	13.2	2.5			<0,1		<0,1		6.8			<0,2	<0,2	1.3	<0,3	<0,3	<5	<5		<0,3	<0,3		<0,3	<0,3
	2015	Long-range transport, rural	Lake Randsfjorden			Arctic char	Salvelinus alpinus	Liver	40.5	785		<0,5	<0,5	<0,5	<0,5	0.63	1.3	8.3	4.6	8.7	1.1			<0,1		<0,1		7.6			<0,2	<0,2	0.3	<0,3	<0,3	<5	<5		<0,3	<0,3		<0,3	<0,3
	2015	Long-range transport, rural	Lake Randsfjorden			Arctic char	Salvelinus alpinus	Liver	44.9	762		<0,5	<0,5	<0,5	<0,5	<0,5	0.6	3.2	1.5	2.1	0.4			<0,1		<0,1		4.6			<0,2	<0,2	0.5	<0,3	<0,3	<5	<5		<0,3	<0,3		<0,3	<0,3
	2015	Long-range transport, rural	Lake Randsfjorden			Arctic char	Salvelinus alpinus	Liver	37.5	587		<0,5	<0,5	<0,5	<0,5	<0,5	1.2	2.5	2	2.5	0.5			<0,1		<0,1		9.2			<0,2	<0,2	0.7	<0,3	<0,3	<5	<5		<0,3	<0,3		<0,3	<0,3
	2015	Long-range transport, rural	Lake Randsfjorden			Arctic char	Salvelinus alpinus	Liver	34.8	407		<0,5	<0,5	<0,5	<0,5	3.5	1	6.7	4.3	6.4	<0,4			<0,1		<0,1		6.9			<0,2	<0,2	0.2	<0,3	<0,3	<5	<5		<0,3	<0,3		<0,3	<0,3
	2015	Long-range transport, rural	Lake Randsfjorden			Brown trout	Salmo trutta	Muscle	34.375	521		<0,5	<0,5	<0,5	<0,5	<0,5	<0,5	<0,5	0.4	0.9	<0,4			<0,1		<0,1		0.2			<0,2	<0,2	<0,1	<0,3	<0,3	<5	<5		<0,3	<0,3		<0,3	<0,3
	2015	Long-range transport, rural	Lake Randsfjorden			Brown trout	Salmo trutta	Muscle	56.625	2070		<0,5	<0,5	<0,5	<0,5	<0,5	<0,5	0.5	<0,4	0.8	<0,4			<0,1		<0,1		0.2			<0,2	<0,2	<0,1	<0,3	<0,3	<5	<5		<0,3	<0,3		<0,3	<0,3
	2015	Long-range transport, rural	Lake Randsfjorden			Brown trout	Salmo trutta	Muscle	54.25	1930		<0,5	<0,5	<0,5	<0,5	<0,5	<0,5	<0,5	0.4	0.7	<0,4			<0,1		<0,1		0.2			<0,2	<0,2	<0,1	<0,3	<0,3	<5	<5		<0,3	<0,3		<0,3	<0,3
	2015	Long-range transport, rural	Lake Randsfjorden			Arctic char	Salvelinus alpinus	Muscle	39.0333	622.667		<0,5	<0,5	<0,5	<0,5	<0,5	<0,5	0.7	<0,4	0.7	<0,4			<0,1		<0,1		0.5			<0,2	<0,2	<0,1	<0,3	<0,3	<5	<5		<0,3	<0,3		<0,3	<0,3
	2014	Long-range transport, rural	Lake Randsfjorden			Brown trout	Salmo trutta	Liver	44.8	900		<1	<0,5	<0,5	<0,5	0.5	0.9	6.7	4.1	24.6	1.5			<0,1		<0,1		3.3			<0,2	<0,2	0.5	<0,3	<0,3	<5	<5		<0,3	<0,3		<0,3
	2014	Long-range transport, rural	Lake Randsfjorden			Brown trout	Salmo trutta	Liver	46.4	1250		<1	<0,5	<0,5	<0,5	0.7	4.1	30.3	20.2	109.3	3.7			<0,1		<0,1		13			<0,2	<0,2	0.9	<0,3	<0,3	<5	<5		<0,3	<0,3		<0,3
	2014	Long-range transport, rural	Lake Randsfjorden			Brown trout	Salmo trutta	Liver	42.5	810		<1	<0,5	<0,5	<0,5	<0,5	1	5.1	4	43.2	2.8			<0,1		<0,1		4			<0,2	<0,2	0.8	<0,3	<0,3	<5	<5		<0,3	<0,3		<0,3
	2014	Long-range transport, rural	Lake Randsfjorden			Brown trout	Salmo trutta	Liver	49.5	1240		<1	<0,5	<0,5	<0,5	0.8	2.3	21.4	11.5	79.8	4			<0,1		<0,1		7.7			<0,2	<0,2	0.6	<0,3	<0,3	<5	<5		<0,3	<0,3		<0,3
	2014	Long-range transport, rural	Lake Randsfjorden			Brown trout	Salmo trutta	Liver	49.7	1615		<1	<0,5	<0,5	<0,5	<0,5	0.7	5.7	4.4	38.8	1.8			<0,1		<0,1		1.8			<0,2	<0,2	2	<0,3	<0,3	<5	<5		<0,3	<0,3		<0,3
	2014	Long-range transport, rural	Lake Randsfjorden			Brown trout	Salmo trutta	Liver	49.8	1270		<1	<0,5	<0,5	<0,5	0.5	2.3	15.3	9.2	28.9	1.8			<0,1		<0,1		9.1			<0,2	<0,2	0.3	<0,3	<0,3	<5	<5		<0,3	<0,3		<0,3
	2014	Long-range transport, rural	Lake Randsfjorden			Brown trout	Salmo trutta	Liver	52.6	1895		<1	<0,5	<0,5	<0,5	0.8	5.7	46.6	24.6	120.1	3.5			<0,1		<0,1		17.8			<0,2	<0,2	1.7	<0,3	<0,3	<5	<5		<0,3	<0,3		<0,3
	2014	Long-range transport, rural	Lake Randsfjorden			Brown trout	Salmo trutta	Liver	53.4	1510		<1	<0,5	<0,5	<0,5	0.6	4.2	36.3	22.9	165.5	3.6			<0,1		<0,1		17.9			<0,2	<0,2	0.3	<0,3	<0,3	<5	<5		<0,3	<0,3		<0,3
	2014	Long-range transport, rural	Lake Randsfjorden			Brown trout	Salmo trutta	Liver	80.5	6320		<1	<0,5	<0,5	<0,5	<0,5	0.8	3.2	2.4	8.5	1.1			<0,1		<0,1		3.2			<0,2	<0,2	0.2	<0,3	<0,3	<5	<5		<0,3	<0,3		<0,3
	2014	Long-range transport, rural	Lake Randsfjorden			Brown trout	Salmo trutta	Liver	60.2	2105		<1	<0,5	<0,5	<0,5	<0,5	0.8	1.3	1.5	8.7	0.7			<0,1		<0,1		1.5			<0,2	<0,2	0.4	<0,3	<0,3	<5	<5		<0,3	<0,3		<0,3
	2014	Long-range transport, rural	Lake Randsfjorden			Brown trout	Salmo trutta	Liver	53.3	1630		<1	<0,5	<0,5	<0,5	0.6	2.9	19.2	14.7	93.1	6.2			<0,1		<0,1		12.2			<0,2	<0,2	1	<0,3	<0,3	<5	<5		<0,3	<0,3		<0,3
	2014	Long-range transport, rural	Lake Randsfjorden			Brown trout	Salmo trutta	Liver	53.2	1790		<1	<0,5	<0,5	<0,5	<0,5	1.8	8.2	6.5	40.5	1.9			<0,1		<0,1		3.6			<0,2	<0,2	0.8	<0,3	<0,3	<5	<5		<0,3	<0,3		<0,3
	2014	Long-range transport, rural	Lake Randsfjorden			European smelt	Osmerus eperlanus	Liver	12.15	10		<1	<0,5	<0,5	<0,5	<0,5	1.1	6.2	5.7	10	1.6			<0,1		<0,1		2.3			<0,2	<0,2	0.5	<0,3	<0,3	<5	<5		<0,3	<0,3		0.4
	2014	Long-range transport, rural	Lake Randsfjorden			European smelt	Osmerus eperlanus	Liver	12.625	10.225		<1	<0,5	<0,5	<0,5	<0,5	1	3.5	3.3	6.2	1.6			<0,1		<0,1		1.7			<0,2	<0,2	0.4	<0,3	<0,3	<5	<5		<0,3	<0,3		<0,3
	2014	Long-range transport, rural	Lake Randsfjorden			European smelt	Osmerus eperlanus	Liver	12.6	11		<1	<0,5	<0,5	<0,5	<0,5	1.5	4.3	3.8	6.4	2.1			<0,1		<0,1		1.9			<0,2	<0,2	0.6	<0,3	<0,3	<5	<5		<0,3	<0,3		0.3
	2014	Long-range transport, rural	Lake Randsfjorden			European smelt	Osmerus eperlanus	Liver	12.2667	9.4		<1	<0,5	<0,5	<0,5	<0,5	0.9	4	3	6.7	1.3			<0,1		<0,1		1.5			<0,2	<0,2	0.6	<0,3	<0,3	<5	<5		<0,3	<0,3		0.5
	2014	Long-range transport, rural	Lake Randsfjorden			European smelt	Osmerus eperlanus	Liver	12.6	10.15		<1	<0,5	<0,5	<0,5	<0,5	1	4.5	4.2	13.3	1.8			<0,1		<0,1		2.5			<0,2	<0,2	0.6	<0,3	<0,3	<5	<5		<0,3	<0,3		0.3
	2014	Long-range transport, rural	Lake Randsfjorden			European smelt	Osmerus eperlanus	Liver	12.675	10.225		<1	<0,5	<0,5	<0,5	<0,5	1.3	5.1	4.2	5.9	1.6			<0,1		<0,1		1.9			<0,2	<0,2	0.5	<0,3	<0,3	<5	<5		<0,3	<0,3		<0,3
	2014	Long-range transport, rural	Lake Randsfjorden			European smelt	Osmerus eperlanus	Liver	11.85	9.875		<1	<0,5	<0,5	<0,5	<0,5	1.7	5.3	4.9	5.6	1.4			<0,1		<0,1		2.1			<0,2	<0,2	0.6	<0,3	<0,3	<5	<5		<0,3	<0,3		<0,3
	2014	Long-range transport, rural	Lake Randsfjorden			European smelt	Osmerus eperlanus	Liver	12.6	10.225		<1	<0,5	<0,5	<0,5	<0,5	1	2.6	3.5	4.9	1.3			<0,1		<0,1		1.1			<0,2	<0,2	0.4	<0,3	<0,3	<5	<5		<0,3	<0,3		<0,3
	2014	Long-range transport, rural	Lake Randsfjorden			European smelt	Osmerus eperlanus	Liver	12.575	10.6		<1	<0,5	<0,5	<0,5	<0,5	1.8	6.4	4.4	10.2	1.5			<0,1		<0,1		2.4			<0,2	<0,2	0.6	<0,3	<0,3	<5	<5		<0,3	<0,3		<0,3
	2014	Long-range transport, rural	Lake Randsfjorden			Brown trout	Salmo trutta	Muscle				<1	<0,5	<0,5	<0,5	<0,5	<0,5	0.5	<0,4	4.8	0.9			<0,1		<0,1		0.1			<0,2	<0,2	<0,1	<0,3	<0,3	<5	<5		<0,3	<0,3		<0,3
	2014	Long-range transport, rural	Lake Randsfjorden			Brown trout	Salmo trutta	Muscle				<1	<0,5	<0,5	<0,5	<0,5	<0,5	0.4	0.5	5.4	0.7			<0,1		<0,1		0.2			<0,2	<0,2	<0,1	<0,3	<0,3	<5	<5		<0,3	<0,3		<0,3
	2014	Long-range transport, rural	Lake Randsfjorden			Brown trout	Salmo trutta	Muscle				<1	<0,5	<0,5	<0,5	<0,5	<0,5	<0,4	0.5	2.9	<0,4			<0,1		<0,1		0.2			<0,2	<0,2	<0,1	<0,3	<0,3	<5	<5		<0,3	<0,3		<0,3
	2014	Long-range transport, rural	Lake Randsfjorden			European smelt	Osmerus eperlanus	Muscle				<1	<0,5	<0,5	<0,5	<0,5	<0,5	0.8	0.6	3.6	0.4			<0,1		<0,1		0.2			<0,2	<0,2	<0,1	<0,3	<0,3	<5	<5		<0,3	<0,3		<0,3
	2014	Long-range transport, rural	Lake Randsfjorden			European smelt	Osmerus eperlanus	Muscle				<1	<0,5	<0,5	<0,5	<0,5	<0,5	0.6	0.5	3.2	0.5			<0,1		<0,1		0.2			<0,2	<0,2	<0,1	<0,3	<0,3	<5	<5		<0,3	<0,3		<0,3
	2014	Long-range transport, rural	Lake Randsfjorden			European smelt	Osmerus eperlanus	Muscle				<1	<0,5	<0,5	<0,5	<0,5	<0,5	0.6	<0,4	2	<0,4			<0,1		<0,1		0.2			<0,2	<0,2	<0,1	<0,3	<0,3	<5	<5		<0,3	<0,3		<0,3
	2013	Long-range transport, rural	Lake Randsfjorden			Brown trout	Salmo trutta	Muscle	48.5	1325		<2	<0,5	<0,5	<0,4	<0,6	<0,5	<0,4	<0,4	1.6	<0,4			<0,1		<0,1		0.08		<0,2	<0,2	<0,2	<0,1	<0,3	<0,3	<5	<5					<0,3
	2013	Long-range transport, rural	Lake Randsfjorden			Brown trout	Salmo trutta	Muscle	47.4	1205		<2	<0,5	<0,5	<0,4	<0,6	<0,5	0.79	0.85	3.6	0.51			<0,1		1.2		0.24		<0,2	<0,2	<0,2	<0,1	<0,3	<0,3	<5	<5					<0,3
	2013	Long-range transport, rural	Lake Randsfjorden			Brown trout	Salmo trutta	Muscle	47.1	1170		<2	<0,5	<0,5	<0,4	<0,6	<0,5	0.7	0.69	3.4	0.4			<0,1		<0,1		0.13		<0,2	<0,2	<0,2	<0,1	<0,3	<0,3	<5	<5					<0,3
	2013	Long-range transport, rural	Lake Randsfjorden			Brown trout	Salmo trutta	Muscle	47.2	1195		<2	<0,5	<0,5	<0,4	<0,6	<0,5	<0,4	<0,4	0.57	<0,4			<0,1		0.19		0.07		<0,2	<0,2	<0,2	<0,1	<0,3	<0,3	<5	<5					<0,3
	2013	Long-range transport, rural	Lake Randsfjorden			Brown trout	Salmo trutta	Muscle	45.7	1025		<2	<0,5	<0,5	<0,4	<0,6	<0,5	0.6	0.79	3.6	0.46			<0,1		<0,1		0.17		<0,2	<0,2	<0,2	<0,1	<0,3	<0,3	<5	<5					<0,3
	2013	Long-range transport, rural	Lake Randsfjorden			Brown trout	Salmo trutta	Muscle	44	783		<2	<0,5	<0,5	<0,4	<0,6	<0,5	<0,4	<0,4	2.1	<0,4			<0,1		<0,1		0.08		<0,2	<0,2	<0,2	<0,1	<0,3	<0,3	<5	<5					<0,3
	2013	Long-range transport, rural	Lake Randsfjorden			Brown trout	Salmo trutta	Muscle	57.8	2098		<2	<0,5	<0,5	<0,4	<0,6	<0,5	0.92	0.88	3.6	0.4			<0,1		0.15		0.19		<0,2	<0,2	<0,2	<0,1	<0,3	<0,3	<5	<5					<0,3
	2013	Long-range transport, rural	Lake Randsfjorden			Brown trout	Salmo trutta	Muscle	61.5	2410		<2	<0,5	<0,5	<0,4	<0,6	<0,5	<0,4	<0,4	2.3	<0,4			<0,1		<0,1		0.12		<0,2	<0,2	<0,2	<0,1	<0,3	<0,3	<5	<5					<0,3
	2013	Long-range transport, rural	Lake Randsfjorden			Brown trout	Salmo trutta	Muscle	55.7	2010		<2	<0,5	<0,5	<0,4	<0,6	<0,5	<0,4	0.46	2.3	<0,4			<0,1		0.1		0.14		<0,2	<0,2	<0,2	<0,1	<0,3	<0,3	<5	<5					<0,3
	2013	Long-range transport, rural	Lake Randsfjorden			Brown trout	Salmo trutta	Muscle	57	1880		<2	<0,5	<0,5	<0,4	<0,6	<0,5	<0,4	<0,4	<0,4	<0,4			<0,1		0.16		0.08		<0,2	<0,2	<0,2	<0,1	<0,3	<0,3	<5	<5					<0,3
	2013	Long-range transport, rural	Lake Randsfjorden			Brown trout	Salmo trutta	Muscle	56.2	2105		<2	<0,5	<0,5	<0,4	<0,6	<0,5	0.88	0.73	4.2	0.42			<0,1		0.12		0.19		<0,2	<0,2	<0,2	<0,1	<0,3	<0,3	<5	<5					<0,3
	2013	Long-range transport, rural	Lake Randsfjorden			Brown trout	Salmo trutta	Muscle	67.8	3525		<2	<0,5	<0,5	<0,4	<0,6	<0,5	0.53	0.6	2.3	<0,4			<0,1		<0,1		0.14		<0,2	<0,2	<0,2	<0,1	<0,3	<0,3	<5	<5					<0,3
	2013	Long-range transport, rural	Lake Randsfjorden			Brown trout	Salmo trutta	Muscle	54.5	1550		<2	<0,5	<0,5	<0,4	<0,6	<0,5	<0,4	<0,4	2.2	<0,4			<0,1		0.41		0.15		<0,2	<0,2	<0,2	<0,1	<0,3	<0,3	<5	<5					<0,3
	2013	Long-range transport, rural	Lake Randsfjorden			Brown trout	Salmo trutta	Muscle	56.3	1990		<2	<0,5	<0,5	<0,4	<0,6	<0,5	<0,4	<0,4	2.4	0.4			<0,1		<0,1		0.07		<0,2	<0,2	<0,2	<0,1	<0,3	<0,3	<5	<5					<0,3
	2013	Long-range transport, rural	Lake Randsfjorden			Brown trout	Salmo trutta	Muscle	53	1605		<2	<0,5	<0,5	<0,4	<0,6	<0,5	<0,4	<0,4	0.58	<0,4			<0,1		<0,1		0.07		<0,2	<0,2	<0,2	<0,1	<0,3	<0,3	<5	<5					<0,3
	2013	Long-range transport, rural	Lake Randsfjorden			European smelt	Osmerus eperlanus	Muscle	11.9333	9.65		<2	<0,5	<0,3	<0,4	<0,5	<0,5	0.75	0.55	1	<0,4			<0,1		<0,1		0.12		<0,2	<0,2	<0,2	<0,1	<0,3	<0,3	<5	<5					<0,3
	2013	Long-range transport, rural	Lake Randsfjorden			European smelt	Osmerus eperlanus	Muscle	12.4167	9.9		<2	<0,5	<0,3	<0,4	<0,5	<0,5	0.44	0.42	0.84	<0,4			<0,1		<0,1		0.07		<0,2	<0,2	<0,2	<0,1	<0,3	<0,3	<5	<5					<0,3
	2013	Long-range transport, rural	Lake Randsfjorden			European smelt	Osmerus eperlanus	Muscle	11.9286	9.3		<2	<0,5	<0,3	<0,4	<0,5	<0,5	<0,4	<0,4	0.68	<0,4			<0,1		<0,1		0.09		<0,2	<0,2	<0,2	<0,1	<0,3	<0,3	<5	<5					<0,3
	2013	Long-range transport, rural	Lake Randsfjorden			European smelt	Osmerus eperlanus	Muscle	12.2	9.66667		<2	<0,5	<0,3	<0,4	<0,5	<0,5	0.49	0.51	0.97	<0,4			<0,1		<0,1		0.07		<0,2	<0,2	<0,2	0.11	<0,3	<0,3	<5	<5					<0,3
	2013	Long-range transport, rural	Lake Randsfjorden			European smelt	Osmerus eperlanus	Muscle	12.44	10.64		<2	<0,5	<0,3	<0,4	<0,5	<0,5	0.69	<0,4	1.6	<0,4			<0,1		<0,1		0.13		<0,2	<0,2	<0,2	0.11	<0,3	<0,3	<5	<5					<0,3
	2013	Long-range transport, rural	Lake Randsfjorden			European smelt	Osmerus eperlanus	Muscle	11.8	9.58		<2	<0,5	<0,3	<0,4	<0,5	<0,5	0.45	0.49	1	<0,4			<0,1		<0,1		0.07		<0,2	<0,2	<0,2	0.11	<0,3	<0,3	<5	<5					<0,3
	2013	Long-range transport, rural	Lake Randsfjorden			European smelt	Osmerus eperlanus	Muscle	12.66	11.2		<2	<0,5	<0,3	<0,4	<0,5	<0,5	<0,4	<0,4	0.81	<0,4			<0,1		<0,1		<0,05		<0,2	<0,2	<0,2	0.1	<0,3	<0,3	<5	<5					<0,3
	2013	Long-range transport, rural	Lake Randsfjorden			European smelt	Osmerus eperlanus	Muscle	12.9	11.12		<2	<0,5	<0,3	<0,4	<0,5	<0,5	0.42	<0,4	1.1	<0,4			<0,1		<0,1		<0,05		<0,2	<0,2	<0,2	0.1	<0,3	<0,3	<5	<5					<0,3
	2013	Long-range transport, rural	Lake Randsfjorden			European smelt	Osmerus eperlanus	Muscle	12.78	11.18		<2	<0,5	<0,3	<0,4	<0,5	<0,5	0.46	<0,4	0.82	<0,4			<0,1		<0,1		<0,05		<0,2	<0,2	<0,2	<0,1	<0,3	<0,3	<5	<5					<0,3
	2013	Long-range transport, rural	Lake Randsfjorden			European smelt	Osmerus eperlanus	Muscle	13	11.98		<2	<0,5	<0,3	<0,4	<0,5	<0,5	<0,4	<0,4	0.75	<0,4			<0,1		<0,1		<0,05		<0,2	<0,2	<0,2	<0,1	<0,3	<0,3	<5	<5					<0,3
	2013	Long-range transport, rural	Lake Randsfjorden			European smelt	Osmerus eperlanus	Muscle	12.575	10.775		<2	<0,5	<0,3	<0,4	<0,5	<0,5	<0,4	<0,4	0.86	<0,4			<0,1		<0,1		0.05		<0,2	<0,2	<0,2	<0,1	<0,3	<0,3	<5	<5					<0,3
	2013	Long-range transport, rural	Lake Randsfjorden			European smelt	Osmerus eperlanus	Muscle	12.64	11.26		<2	<0,5	<0,3	<0,4	<0,5	<0,5	0.43	<0,4	0.88	<0,4			<0,1		<0,1		<0,05		<0,2	<0,2	<0,2	<0,1	<0,3	<0,3	<5	<5					<0,3
	2013	Long-range transport, rural	Lake Randsfjorden			European smelt	Osmerus eperlanus	Muscle	12.42	10.8		<2	<0,5	<0,3	<0,4	<0,5	<0,5	0.4	<0,4	0.68	<0,4			<0,1		<0,1		<0,05		<0,2	<0,2	<0,2	<0,1	<0,3	<0,3	<5	<5					<0,3
	2013	Long-range transport, rural	Lake Randsfjorden			European smelt	Osmerus eperlanus	Muscle	12.64	11.9		<2	<0,5	<0,3	<0,4	<0,5	<0,5	<0,4	<0,4	0.67	<0,4			<0,1		<0,1		0.06		<0,2	<0,2	<0,2	<0,1	<0,3	<0,3	<5	<5					<0,3
	2013	Long-range transport, rural	Lake Randsfjorden			European smelt	Osmerus eperlanus	Muscle	12.06	10.22		<2	<0,5	<0,3	<0,4	<0,5	<0,5	<0,4	<0,4	0.76	<0,4			<0,1		<0,1		<0,05		<0,2	<0,2	<0,2	<0,1	<0,3	<0,3	<5	<5					<0,3
	2016	Paper industry	Lake Tyrifjorden			Perch	Perca fluviatilis	Liver	30.94	383.6		<0,5	<0,5	0.9	1.5	0.5	6.2	8.5	12.4	4.9	3.8	<0,4		<0,2	<0,2	<0,1	<0,2	104		<0,2	0.3	<0,2	<0,1	<0,3	<0,3	<5	<5		<0,3	0.4	<0,3	<0,3	<0,3
	2016	Paper industry	Lake Tyrifjorden			Perch	Perca fluviatilis	Liver	22.58	155.4		<0,5	<0,5	<0,5	1	1.1	12.6	13.3	19.4	6.4	6.8	<0,4		<0,2	<0,2	<0,1	<0,2	153		<0,2	0.3	<0,2	0.3	<0,3	<0,3	<5	<5		<0,3	1.1	<0,3	<0,3	<0,3
	2016	Paper industry	Lake Tyrifjorden			Perch	Perca fluviatilis	Liver	20.04	109		<0,5	<0,5	1.3	2.4	0.8	10.8	11.5	18.9	7.7	6.7	<0,4		<0,2	<0,2	<0,1	<0,2	182		<0,2	0.3	<0,2	<0,1	<0,3	<0,3	<5	<5		<0,3	0.7	<0,3	<0,3	<0,3
	2016	Paper industry	Lake Tyrifjorden			Perch	Perca fluviatilis	Liver	21.58	142.4		<0,5	<0,5	1.5	2.6	0.6	15.3	11.1	14.8	5	4	<0,4		<0,2	<0,2	<0,1	<0,2	315		<0,2	0.3	<0,2	0.2	<0,3	<0,3	<5	<5		<0,3	0.9	<0,3	<0,3	<0,3
	2016	Paper industry	Lake Tyrifjorden			Perch	Perca fluviatilis	Liver	19.72	104.2		<0,5	<0,5	0.8	3	0.3	20.3	13.6	16.4	5.6	5.2	<0,4		<0,2	<0,2	<0,1	<0,2	214		<0,2	0.2	<0,2	0.7	<0,3	<0,3	<5	<5		<0,3	0.7	<0,3	<0,3	<0,3
	2015	Paper industry	Lake Tyrifjorden			Perch	Perca fluviatilis	Liver	30.28	358.4		<0,5	<0,5	<0,5	<0,5	1.1	10.6	12.4	16.4	9.2	6.4			<0,1		<0,1		84.5			<0,2	<0,2	0.6	<0,3	<0,3	<5	<5		<0,3	<0,3		<0,3	0.5
	2015	Paper industry	Lake Tyrifjorden			Perch	Perca fluviatilis	Liver	25.78	202.6		<0,5	<0,5	<0,5	<0,5	2.7	17.9	22.2	26.4	15.4	9.4			<0,1		<0,1		199.3			0.4	<0,2	1.8	<0,3	<0,3	<5	<5		<0,3	<0,3		<0,3	0.8
	2015	Paper industry	Lake Tyrifjorden			Perch	Perca fluviatilis	Liver	26.98	241		<0,5	<0,5	<0,5	<0,5	1.6	16	22.2	28.3	13.5	10.1			<0,1		<0,1		209			0.7	<0,2	1.6	<0,3	<0,3	<5	<5		<0,3	<0,3		<0,3	0.5
	2015	Paper industry	Lake Tyrifjorden			Perch	Perca fluviatilis	Liver	20.46	114.4		<0,5	<0,5	<0,5	<0,5	3.9	20.4	18.4	29.3	15.8	10.7			<0,1		<0,1		224.8			0.5	<0,2	2.6	<0,3	<0,3	<5	<5		<0,3	<0,3		<0,3	0.9
	2015	Paper industry	Lake Tyrifjorden			Perch	Perca fluviatilis	Liver	20.42	105.8		<0,5	<0,5	<0,5	<0,5	4.5	17.2	15.8	22.8	12.1	11.4			<0,1		<0,1		198.1			0.4	<0,2	2.2	<0,3	<0,3	<5	<5		<0,3	<0,3		<0,3	1.4
	2014	Paper industry	Lake Tyrifjorden			Perch	Perca fluviatilis	Liver	27.36	275.8		<3	<1	<0,5	<0,4	0.7	6.8	8.1	12.4	4.9	3.5			<0,1		<0,2		101			0.2	<0,2	0.5	<0,3	<0,3	<5	<5		<0,3	0.4		<0,3
	2014	Paper industry	Lake Tyrifjorden			Perch	Perca fluviatilis	Liver	23.26	153.6		<3	<1	<0,5	<0,4	2.7	18.3	17.5	23.4	8.5	2.2			<0,1		<0,2		185			0.5	<0,2	1.3	<0,3	<0,3	<5	<5		<0,3	2.3		<0,3
	2014	Paper industry	Lake Tyrifjorden			Perch	Perca fluviatilis	Liver	28.3	308.4		<3	<1	<0,5	<0,4	0.6	12.7	12.3	17.3	6.2	3.4			<0,1		<0,2		96			0.2	<0,2	0.9	<0,3	<0,3	<5	<5		<0,3	0.8		<0,3
	2014	Paper industry	Lake Tyrifjorden			Perch	Perca fluviatilis	Liver	23.82	176.8		<3	<1	<0,5	<0,4	1.7	22.4	20.8	29.4	11.6	4			<0,1		<0,2		190			0.4	<0,2	0.9	<0,3	<0,3	<5	<5		<0,3	1		<0,3
	2014	Paper industry	Lake Tyrifjorden			Perch	Perca fluviatilis	Liver	27.98	273.8		<3	<1	<0,5	<0,4	1	11.6	11.1	13.6	4.6	1.4			<0,1		<0,2		79			0.2	<0,2	1.1	<0,3	<0,3	<5	<5		<0,3	0.4		<0,3
	2016	AFFF	Rygge-Vansjø			Perch	Perca fluviatilis	Liver	28.88	328.8		<0,5	<0,5	0.8	2.1	0.5	1.4	2.9	1	1.5	0.4	<0,4		<0,2	<0,2	0.4	<0,2	212		<0,2	0.5	<0,2	<0,1	<0,3	<0,3	<5	<5		<0,3	<0,3	<0,3	<0,3	7
	2016	AFFF	Rygge-Vansjø			Perch	Perca fluviatilis	Liver	25.34	227.6		<0,5	<0,5	1	1.8	0.8	3.2	6.2	1.7	2.2	0.6	<0,4		<0,2	<0,2	0.6	0.7	548		0.2	0.7	0.3	0.6	<0,3	<0,3	<5	<5		<0,3	<0,3	<0,3	<0,3	9.9
	2016	AFFF	Rygge-Vansjø			Perch	Perca fluviatilis	Liver	20.38	114.4		<0,5	<0,5	1.1	2	<0,5	1.8	3.6	1	2	0.6	<0,4		<0,2	<0,2	0.7	0.2	349		<0,2	0.5	<0,2	0.7	<0,3	<0,3	<5	<5		<0,3	<0,3	<0,3	<0,3	6.5
	2016	AFFF	Rygge-Vansjø			Perch	Perca fluviatilis	Liver	23.42	178.8		<0,5	<0,5	0.8	1.9	<0,5	2	4.3	1.4	2.4	0.6	<0,4		<0,2	<0,2	0.4	<0,2	269		<0,2	0.5	<0,2	<0,1	<0,3	<0,3	<5	<5		<0,3	<0,3	<0,3	<0,3	0.7
	2016	AFFF	Rygge-Vansjø			Perch	Perca fluviatilis	Liver	25.08	203.6		<0,5	<0,5	1.6	2.3	<0,5	2.5	4.9	1.8	3.5	0.8	<0,4		<0,2	<0,2	<0,1	<0,2	265		<0,2	0.6	<0,2	<0,1	<0,3	<0,3	<5	<5		<0,3	<0,3	<0,3	<0,3	<0,3
	2015	AFFF	Rygge-Vansjø			Perch	Perca fluviatilis	Liver	27.12	285		<0,5	<0,5	<0,5	<0,5	<0,5	2.5	4.4	1.6	2.1	0.4			<0,1		0.4		257.4			0.6	<0,2	0.5	<0,3	<0,3	<5	<5		<0,3	<0,3		<0,3	4
	2015	AFFF	Rygge-Vansjø			Perch	Perca fluviatilis	Liver	22.78	158.8		<0,5	<0,5	<0,5	<0,5	<0,5	3	5.1	1.9	2.6	0.5			<0,1		0.4		259.9			0.6	<0,2	0.7	<0,3	<0,3	<5	<5		<0,3	<0,3		<0,3	2.6
	2015	AFFF	Rygge-Vansjø			Perch	Perca fluviatilis	Liver	17.96	70.8		<0,5	<0,5	<0,5	<0,5	<0,5	3.1	5.5	4.6	2.4	1.7			<0,1		2.4		543.1			0.5	<0,2	0.9	<0,3	<0,3	<5	<5		<0,3	<0,3		0.7	18.6
	2015	AFFF	Rygge-Vansjø			Perch	Perca fluviatilis	Liver	18.28	74.6		<0,5	<0,5	<0,5	<0,5	0.7	2.9	5.1	3.8	3.2	1.8			<0,1		6.4		499.5			0.6	<0,2	0.9	<0,3	<0,3	<5	<5		<0,3	<0,3		7.2	16.7
	2015	AFFF	Rygge-Vansjø			Perch	Perca fluviatilis	Liver	14.96	39.6		<0,5	<0,5	<0,5	<0,5	<0,5	2	3.7	1.5	2.3	0.5			<0,1		0.1		171.1			0.4	<0,2	0.1	<0,3	<0,3	<5	<5		<0,3	<0,3		<0,3	3
	2014	AFFF	Rygge-Vansjø			Perch	Perca fluviatilis	Liver	14.34	35.4		<1	<0,5	<0,5	<0,5	<0,5	2.3	3.6	1.6	1.6	0.4			<0,1		0.1		188			0.4	<0,2	0.2	<0,3	<0,3	<5	<5		<0,3	<0,3		0.4
	2014	AFFF	Rygge-Vansjø			Perch	Perca fluviatilis	Liver	15	38.8		<1	<0,5	<0,5	<0,5	<0,5	1.6	2.9	1.7	1.9	0.4			<0,1		0.1		138			0.3	<0,2	0.3	<0,3	<0,3	<5	<5		<0,3	<0,3		0.4
	2014	AFFF	Rygge-Vansjø			Perch	Perca fluviatilis	Liver	21.42	154.2		<1	<0,5	<0,5	<0,5	<0,5	1.7	4.2	1.4	1.6	0.4			<0,1		0.1		188			0.3	<0,2	0.5	<0,3	<0,3	<5	<5		<0,3	<0,3		<0,3
	2014	AFFF	Rygge-Vansjø			Perch	Perca fluviatilis	Liver	31.52	458		<1	<0,5	<0,5	<0,5	<0,5	2.6	6.3	2	2.3	0.8			<0,1		0.2		235			0.5	<0,2	0.3	<0,3	<0,3	<5	<5		<0,3	<0,3		<0,3
	2014	AFFF	Rygge-Vansjø			Perch	Perca fluviatilis	Liver	25.9	286.8		<1	<0,5	<0,5	<0,5	<0,5	2.5	3.7	1.1	1.4	0.6			<0,1		0.2		116			0.3	<0,2	0.3	<0,3	<0,3	<5	<5		<0,3	<0,3		<0,3
SB-Ø01-HF	2018	AFFF	Oslo airport_Sogna	Whole fish from a small creek. Not included in the study		Brown trout	Salmo trutta	Whole	12.5	25	<0,500	<0,500	<0,500	<0,500	<0,500	40.4	3.34	9.83	<0,500	0.976	<0,500			<0,750		3.09	26.3	1300			1.42		0.556								<1,00	<0,750	2.01				<1,00	<1,00
SB-Ø02-HF	2018	AFFF	Oslo airport_Sogna	Whole fish from a small creek. Not included in the study		Brown trout	Salmo trutta	Whole	11.7	18	<0,500	<0,500	0.671	<0,500	<0,500	44.8	4.19	13.7	<0,500	1.05	<0,500			<0,750		4.12	42	1770			2.42		<0,500								<1,00	<0,750	2.62				<1,00	<1,00
SB-Ø03-HF	2018	AFFF	Oslo airport_Sogna	Whole fish from a small creek. Not included in the study		Brown trout	Salmo trutta	Whole	11.8	20	<0,500	<0,500	1.16	<0,500	<0,500	19	2.13	7.22	<0,500	0.652	<0,500			<0,750		3.55	23.8	1010			0.839		<0,500								<1,00	<0,750	1.68				<1,00	<1,00
SC-Ø01-HF	2018	AFFF	Oslo airport_Sogna	Whole fish from a small creek. Not included in the study		Brown trout	Salmo trutta	Whole	12.2	21	<0,500	<0,500	<0,500	<0,500	<0,500	11.3	0.729	0.987	<0,500	<0,500	<0,500			<0,750		1.03	3.42	289			<0,750		<0,500								<1,00	<0,750	<1,00				<1,00	2.07
SC-Ø02-HF	2018	AFFF	Oslo airport_Sogna	Whole fish from a small creek. Not included in the study		Brown trout	Salmo trutta	Whole	13	24	<0,500	<0,500	<0,500	<0,500	<0,500	12	1.2	3.36	<0,500	<0,500	<0,500			<0,750		3.51	8.1	675			<0,750		0.652								<1,00	<0,750	<1,00				<1,00	3.16
LA-Ø01-HF	2018	AFFF	Oslo airport_Leira			Brown trout	Salmo trutta	Whole	29	206	<0,500	<0,500	1.07	<0,500	<0,500	<0,500	<0,500	<0,500	<0,500	<0,500	<0,500			<0,750		<0,750	<0,750	<0,500			<0,750		<0,500								<1,00	<0,750	<1,00				<1,00	<1,00
LA-Ø02-HF	2018	AFFF	Oslo airport_Leira			Brown trout	Salmo trutta	Whole	29.5	215	<0,500	<0,500	<0,500	<0,500	<0,500	<0,500	<0,500	<0,500	<0,500	0.697	<0,500			<0,750		<0,750	<0,750	2.12			<0,750		<0,500								<1,00	<0,750	<1,00				<1,00	<1,00
LA-Ø03-HF	2018	AFFF	Oslo airport_Leira			Brown trout	Salmo trutta	Whole	23.5	136	<0,500	<0,500	<0,500	<0,500	<0,500	<0,500	0.671	0.897	<0,500	1.02	<0,500			<0,750		<0,750	<0,750	4.09			<0,750		<0,500								<1,00	<0,750	<1,00				<1,00	<1,00
LA-Ø04-HF	2018	AFFF	Oslo airport_Leira			Brown trout	Salmo trutta	Whole	21	97	<0,500	<0,500	<0,500	<0,500	<0,500	<0,500	<0,500	<0,500	<0,500	0.533	<0,500			<0,750		<0,750	<0,750	1.79			<0,750		<0,500								<1,00	<0,750	<1,00				<1,00	<1,00
LA-Ø05-HF	2018	AFFF	Oslo airport_Leira			Brown trout	Salmo trutta	Whole	18.5	58	<0,500	<0,500	<0,500	<0,500	<0,500	<0,500	<0,500	<0,500	<0,500	<0,500	<0,500			<0,750		<0,750	<0,750	1.38			<0,750		<0,500								<1,00	<0,750	<1,00				<1,00	<1,00
LA-Ø06-HF	2018	AFFF	Oslo airport_Leira			Brown trout	Salmo trutta	Whole	22.5	93	<0,500	<0,500	<0,500	<0,500	<0,500	<0,500	<0,500	<0,500	<0,500	<0,500	<0,500			<0,750		<0,750	<0,750	0.768			<0,750		<0,500								<1,00	<0,750	<1,00				<1,00	<1,00
LB-G01-M	2018	AFFF	Oslo airport_Leira			Pike	Esox lucius	Muscle	55.5	1142	<0,500	<0,500	<0,500	<0,500	<0,500	<0,500	<0,500	<0,500	<0,500	<0,500	<0,500			<0,750		<0,750	<0,750	22.4			<0,750		<0,500								<1,00	<0,750	<1,00				<1,00	<1,00
LB-G02-M	2018	AFFF	Oslo airport_Leira			Pike	Esox lucius	Muscle	59.5	1426	<0,500	<0,500	<0,500	<0,500	<0,500	<0,500	<0,500	<0,500	<0,500	<0,500	<0,500			<0,750		<0,750	<0,750	19.9			<0,750		<0,500								<1,00	<0,750	<1,00				<1,00	<1,00
LB-S01-M	2018	AFFF	Oslo airport_Leira			Squalius cephalus	Squalius cephalus	Muscle	45	1062	<0,500	<0,500	<0,500	<0,500	<0,500	<0,500	<0,500	<0,500	<0,500	<0,500	<0,500			<0,750		<0,750	<0,750	6.18			<0,750		<0,500								<1,00	<0,750	<1,00				<1,00	<1,00
LC-Ø01-HF	2018	AFFF	Oslo airport_Leira			Brown trout	Salmo trutta	Whole	13.7	28	<0,500	<0,500	0.576	<0,500	<0,500	<0,500	2.16	<0,500	1.02	<0,500	<0,500			<0,750		<0,750	<0,750	28			<0,750		<0,500								<1,00	<0,750	<1,00				<1,00	<1,00
LC-Ø02-HF	2018	AFFF	Oslo airport_Leira			Brown trout	Salmo trutta	Whole	10	10	<0,500	<0,500	<0,500	<0,500	<0,500	<0,500	<0,500	<0,500	<0,500	<0,500	<0,500			<0,750		<0,750	<0,750	6.79			<0,750		<0,500								<1,00	<0,750	<1,00				<1,00	<1,00
LC-Ø03-HF	2018	AFFF	Oslo airport_Leira			Brown trout	Salmo trutta	Whole	10	11	<0,500	<0,500	<0,500	<0,500	<0,500	<0,500	<0,500	<0,500	<0,500	<0,500	<0,500			<0,750		<0,750	<0,750	11.5			<0,750		<0,500								<1,00	<0,750	<1,00				<1,00	<1,00
LC-Ø04-HF	2018	AFFF	Oslo airport_Leira			Brown trout	Salmo trutta	Whole	10.7	15	<0,500	<0,500	<0,500	<0,500	<0,500	1.07	<0,500	0.865	<0,500	<0,500	<0,500			<0,750		<0,750	<0,750	85.9			<0,750		<0,500								<1,00	<0,750	<1,00				<1,00	<1,00
LC-Ø05-HF	2018	AFFF	Oslo airport_Leira			Brown trout	Salmo trutta	Whole	9.8	9	<0,500	<0,500	<0,500	<0,500	<0,500	<0,500	<0,500	0.51	<0,500	<0,500	<0,500			<0,750		<0,750	<0,750	5.69			<0,750		<0,500								<1,00	<0,750	<1,00				<1,00	<1,00
LC-Ø06-HF	2018	AFFF	Oslo airport_Leira			Brown trout	Salmo trutta	Whole	11.2	15	<0,500	<0,500	<0,500	<0,500	<0,500	<0,500	<0,500	<0,500	<0,500	<0,500	<0,500			<0,750		<0,750	<0,750	9.34			<0,750		<0,500								<1,00	<0,750	<1,00				<1,00	<1,00
LC-Ø07-HF	2018	AFFF	Oslo airport_Leira			Brown trout	Salmo trutta	Whole	13.5	27	<0,500	<0,500	<0,500	<0,500	<0,500	<0,500	<0,500	<0,500	<0,500	<0,500	<0,500			<0,750		<0,750	<0,750	10.5			<0,750		<0,500								<1,00	<0,750	<1,00				<1,00	<1,00
LC-Ø08-HF	2018	AFFF	Oslo airport_Leira			Brown trout	Salmo trutta	Whole	9.5	10	<0,500	<0,500	<0,500	<0,500	<0,500	<0,500	<0,500	0.508	<0,500	<0,500	<0,500			<0,750		<0,750	<0,750	7.88			<0,750		<0,500								<1,00	<0,750	<1,00				<1,00	<1,00
LC-Ø09-HF	2018	AFFF	Oslo airport_Leira			Brown trout	Salmo trutta	Whole	10	11	<0,500	<0,500	<0,500	<0,500	<0,500	1.07	0.625	0.794	<0,500	<0,500	<0,500			<0,750		<0,750	<0,750	17.9			<0,750		<0,500								<1,00	<0,750	<1,00				<1,00	<1,00
